# Supplementary material for: Production of Membrane Vesicles by Enterococcus faecium Cultured With or Without Subinhibitory Concentrations of Antibiotics and Their Pathological Effects on Epithelial Cells
Source: Front Cell Infect Microbiol. 2019 Aug 14;9:295. doi: 10.3389/fcimb.2019.00295 (PMC6702262; doi:10.3389/fcimb.2019.00295)
Supplement: Supplementary file 2 [file Table_1.XLSX]

## Sheet: MVsBHI
Number	Accession number	Gene name	Description	Mol%	MW	PI	Cellular localization	No. of amino acid	Sequence
1	AMQ96161.1	rplE	50S ribosomal protein L5	5.5429	20177	9.3	Cytoplasmic	179	MNRLKEKYLKEVTPSLMEKFNYSSVMQTPKVEKIVINMGVGDAVSNAKNLDKAVEELTLITGQKPMITKAKKSIAGFRLREGMPIGAKVTLRGERMYEFLDKLVSVSLPRVRDFHGVSKKAFDGRGNYTLGIKEQLIFPEVDYDLVDKVRGMDIVIVTTANSDEESRELLTQLGMPFQK
2	AMQ96173.1	rpsM	30S ribosomal protein S13	5.5245	13526	10.78	Cytoplasmic	121	MARIAGVDIPRDKRVVVSLTYIYGIGNTTAKKILADAGVSEDVRVRELTNEQTDAIRAEVDKLKVEGDLRREVNLNIKRLMEIGSYRGIRHRRGLPVRGQNTKNNARTRKGPARAIAGKKK
3	AMQ96299.1	rplT	50S ribosomal protein L20	5.2829	13613	10.71	Cytoplasmic	119	MARVKGGTVTRKRRKRVLKLAKGYYGSKHTLFKTAKEQVMNSYNYAYRDRRQKKRDFRKLWIARINAAARMNGLSYSKLMHGLKVAEIDINRKMLADLAVNDAAAFTALADQAKEALAK
4	AMQ96155.1	rpsC	30S ribosomal protein S3	4.6306	24333	9.76	Cytoplasmic	218	MGQKVHPIGMRVGIIRDWDAKWYAEKEYAEFLHEDLRIRKFISTKLADAAVSTVEIERATGRVNISIHTAKPGMVIGKGGSEVESLRKELNKLTGKRIHINIVEIKKPDLDAKLVGEGIARQLENRVAFRRAQKQAIQRSMRAGAQGIKTQVSGRLNGADIARSEGYSEGTVPLHTLRADIDYAWEEADTTYGKLGVKVWIYRGEILPTKKNTEKGGK
5	AMQ96166.1	rpsE	30S ribosomal protein S5	3.8795	17467	9.43	Cytoplasmic	166	MVYIDPKHLELEDRVVAINRVTKVVKGGRRLRFAALVVVGDKNGHVGFGTGKAQEVPEAIRKAIEDAKKNLVEVPMVGSTIPHEVIGAFSGGRILMKPAVEGSGVAAGGPVRAVLELAGVADITSKSLGSNTPINVVRATVEGLKQLKRAEEVAELRGKSVEELIG
6	AMQ96151.1	rplW	50S ribosomal protein L23	3.7555	11034	9.8	Cytoplasmic	96	MNLLDVIKRPVITEKSMLAMDDKKYTFEVDTRANKTLVKQAVEAAFDVKVKNVNIVNVRAKFKRMGKYAGYTKKRRKAIVTLTEDSKEIQLFEAAE
7	AMQ98113.1	groEL	molecular chaperone GroEL	3.4349	57149	4.66	Cytoplasmic	541	MAKELKFAEDARAAMLRGVDKLADTVKVTLGPKGRNVVLEKSYGSPLITNDGVTIAKEIELEDHFENMGAKLVSEVASKTNDIAGDGTTTATVLTQAIVREGLKNVTAGANPLGIRRGIELATKAAVEELHNISTVVDSKEAIAQVAAVSSGSDKVGHLIADAMEKVGNDGVITIEESKGIETELDVVEGMQFDRGYLSQYMVTDNDKMEAVLENPYILITDKKISNIQDILPLLEQILQQSRPLLIIADDVDGEALPTLVLNKIRGTFNVVAVKAPGFGDRRKAMLEDIAILTGGTVITDDLGLELKDVTIENLGNASKVVVDKDNTTIVEGSGEKEAIEARVQLIKNQIAETTSDFDREKLQERLAKLAGGVAVVKVGAATETELKELKLRIEDALN…
8	AMQ98144.1	rplA	50S ribosomal protein L1	2.9983	24521	9.27	Cytoplasmic	229	MAKKSKKMQDALKKVDSSKVYPVAEAVALAKETNIAKFDATVEVAYRLNVDPKKADQQIRGAVVLPNGTGKTQTVLVFAKGDKAKEAEAAGADFVGDDDMVQKIQNGWFDFDVVVATPDMMATVGRLGRVLGPKGLMPNPKTGTVTMDVTKAVNEVKAGKVTYRVDKAGNIHVPIGKVSFDDEKLVENFAAIHDVLLKAKPSAAKGQYMKNVTITTTFGPGIHVDQASF
9	AMQ96148.1	rpsJ	30S ribosomal protein S10	2.8077	11687	9.99	Cytoplasmic	102	MAKQKIRIRLKAYEHRILDQSADKIVETAKRTGASVSGPIPLPTERSLYTIIRATHKYKDSREQFEMRTHKRLIDIVNPTPKTVDALMKLDLPSGVNIEIKL
10	AMQ96212.1	rpsD	30S ribosomal protein S4	2.3318	23153	9.75	Cytoplasmic	203	MSRYTGPSWKISRRLGISLSGTGKELARRPYAPGQHGPNSRGKQSEYGMQLTEKQKLRHMYGMNERQFRNLFVKASKIKEGKHGVNFMILLEQRLDNVVYRLGLATTRRQARQLVNHGHILVDGKRVDIPSYHVEVGQVISVREKSQNIVTVKEAVEATVGRPAFVSFDAEKLEGSLTRLPERDELYPEIDEALVVEYYNQSL
11	AMQ98143.1	rplJ	50S ribosomal protein L10	2.079	17763	5.21	Cytoplasmic	167	MSEAIIAKKAAIVDEVSEKFTAAASVVVVDYRGLTVDEVTRLRKQLRDANVEMKVIKNSILSRAAKKAGLEGMDEVFTGPTAVAFSNEDVVAPAKIMDEFAKEAKALEIKGGIIEGKVSSLEEITALAKLPNREGLLSMLLSVLQAPVRNVAYAVKAVADKEDGDAA
12	AMQ98079.1	HMPREF1359_00603	hypothetical protein AX771_11770	2.0734	12442	6.82	Cytoplasmic	117	MVYVKKSETFKEINFLKSQQFISFTKQVDHTHAGVVNGVLPAGSVYPANDGKAEGITINDVDVSNGAQPVGVIIDGHILIERLPVKPSDAAQKAMREIKLYDASGKMIALPAAASGL
13	AMQ96153.1	rpsS	30S ribosomal protein S19	1.9737	10515	10.04	Cytoplasmic	92	MGRSLKKGPFVDEHLMKKVEAQAGVEKKKVIKTWSRRSTVFPSFVGYTIAVYDGRKHVPVYIQEDMVGHKLGEFAPTRTYRGHAADDKKTKR
14	AMQ96758.1	cps	phage capsid protein	1.9113	42551	5.07	Cytoplasmic	386	MTVKNLKGVTAASDQLMKAFKDGNEESFSAAMVSLSKEIQDKILEEATAKNQDQLVLMNRGQRVLTTQETKFYNEVVKNEGFAGVEELVPATVFERVFEDLEQSHPLLQKITFVNTTGVTEWIVSRGVNPAWWGKLCEAVKKVLDNGFDVINMKQFKLSGYIPVCKAMLDLGPVWLDRYVRTVLVESLRIALEQAIVDGTGKDMPVGMMRDMSKQTSGEYAEKKAEPITALDAVTMGGLMARLSKFNIEGVNDPIYRNVNPSDVVLIVNPTDYWSKVFPAKTVLTANGEYVQVLPVPVSDLQSTAVPEGKAVIGVASDYFMGVGSTLKIEASDEYHFVEDERIYLAKQYANGQPKRNDSFIVLDISALGTTTTTTKPTTTTTTTQA
15	AMQ96152.1	rplB	50S ribosomal protein L2	1.9102	30277	10.53	Cytoplasmic	277	MAIKKYKPTSNGRRNMTGSDFAEITTSTPEKSLLQPLKNHAGRNNNGRITVRHQGGGHKRQYRVIDFKRNKDNVVATVQTIEYDPNRSANIALVHYEDGVKAYILAPKGLEVGMKLVSGPEADIKVGNALPLENIPVGTVIHNIEMKPGKGGQLIRSAGTSAQVLGKEGKYVLIRLNSGEVRMILAACRATIGSVGNEQHELINIGKAGRSRWMRKRPTVRGSVMNPNDHPHGGGEGKAPIGRKAPVSPWGQPALGYKTRNKKAKSDKLIVRRRKNK
16	AMQ96134.1	tmpC	hypothetical protein AX771_00205	1.761	37775	4.58	Extracellular	360	MKKAKLFGLGAVALAAGLFLGACGNNGSTDSSGGKSSSDTTTAALITDTGGVDDRSFNQSAWEGLEKWGKDQGLSRGNDGFQYFQSSNESDYIPNIDQALNAGFKTIFGIGYKLKPAIQEQATNNTGTNFVIIDDVIDGLDNVVSATFKDNEASYLAGVAAAYTTETNVVGFIGGVKGEVIDRFDAGFKAGVDAGAKELGKEIKVLNQYAGDFSAPDKGRSIAQGMYAQNADIIFHASGGTGNGVFQEAKSLNESGDKKVWVIGVDRDQSDEGEYTLNGEKKNFTLTSTLKAVGTVVEDLAQKSADGKFPGGEHTVYGLKEDGVGLTEGQLSDEAKKAVDEAKEKIISGDVKVPETPEEN
17	AMQ96147.1	tuf	elongation factor Tu	1.6494	43198	4.79	Cytoplasmic	395	MAKEKFDRSKPHVNIGTIGHVDHGKTTLTAAITTVLSKKNGGQAMAYDQIDGAPEERERGITISTAHVEYETDTRHYAHVDCPGHADYVKNMITGAAQMDGAILVVSAADGPMPQTREHILLSRQVGVPYIVVFLNKVDMVDDEELLELVEMEVRDLLTEYEFPGDDVPVVAGSALKALEGDASYEEKILELMAAVDEYIPTPERDNDKPFMMPVEDVFSITGRGTVATGRVERGQVRVGDEVEVVGIAEETSKTTVTGVEMFRKLLDYAEAGDNIGALLRGVAREDIQRGQVLAKPGTITPHTKFSAEVYVLTKEEGGRHTPFFTNYRPQFYFRTTDVTGVVELPEGTEMVMPGDNVTMEVELIHPIAIENGTKFSIREGGRTVGAGVVTEIKA
18	AMQ96683.1	rplU	50S ribosomal protein L21	1.5764	11094	9.63	Cytoplasmic	102	MYAIIKTGGKQVKVEVGQAIYVEKLDVEAGEKVVFDEVILVGGESTKVGAPTVAGATVEGTVEKHGKQKKVVTFKYKPKKHSHRKQGHRQPYTKVVIDAINA
19	AMQ98074.1	CUS93_13145	phage tail protein	1.4061	18637	4.34	Extracellular	170	MEALKGIDVILLYRLLKKETQEAAWKMAFQTEHENGLSRDSDSTVTKDGNVQSLSPVEYDFSATSIVAKGDSHVDEMKQALLNGDIIEIWEINKAEQGTDDNANKYKATYYQAYVSEFTPSAAAEDNVELNLSFAVNGVGQDGYATLTEDQADVVQYAFKDTVKATSTGA
20	AMQ96149.1	rplC	50S ribosomal protein L3	1.2814	22764	10.16	Cytoplasmic	209	MTKGILGKKVGMTQIFTESGELIPVTVVEATPNVVLQVKTMETDGYEAIQVGYQDMREVLSNKPAKGHVAKANTAPKRFIREFKNVELGEYEVGKEITVDVFQAGDIIDVTGTTKGKGFQGVIKRHGQSRGPMAHGSRYHRRPGSMGPVAPNRVFKNKRLAGRMGGNRVTIQNLEVVRVDAERNVILIKGNVPGAKKSLITIKSAVKAK
21	AMQ96144.1	rpsL	30S ribosomal protein S12	1.0891	15206	11.28	Cytoplasmic	137	MPTINQLVRKPRKSKVEKSNSPALNKGYNSFKKTQTNVNSPQKRGVATRVGTMTPKKPNSALRKYARVRLSNLIEVTAYIPGIGHNLQEHSVVLLRGGRVKDLPGVRYHIVRGALDTAGVNDRKQSRSKYGTKKPKA
22	AMQ96257.1	cshA	DEAD/DEAH box helicase	1.067	56196	9.49	Cytoplasmic	503	MKFKELELSPELLKSVERAGFEEATPIQAETIPLALAGKDVIGQAQTGTGKTAAFGLPMLEKIDPDRHELQGLVIAPTRELAIQTQEELYRLGRDKKVRVQAVYGGADIGRQIRGLKDRPHIVVGTPGRMLDHINRHTLKLGTVQTLVLDEADEMLNMGFLEDIEKIISQVPDQRQTLLFSATMPPAIKNIGVKFMKNPHHVKIKAKEMTADLIDQYYVRAKEYEKFDIMTRLFDVQTPELTIVFGRTKRRVDELARGLEARGYRAEGIHGDLSQQKRMSVLRSFKSGHLDILVATDVAARGLDISGVTHVYNYDIPQDPESYVHRIGRTGRAGKGGMSVTFVTPNEMDYLHVIENLTKKRMTTLRPPTEKEAFKGQLGAAVEQIETKLAENGLDKYLQ…
23	AMQ98405.1	rplM	50S ribosomal protein L13	1	16311	9.95	Cytoplasmic	147	MRTTYMAKPGEVERKWYVVDATDVPLGRLSTVVASVLRGKNKPTFTPHLDTGDFVIVINADKVKLTGKKATDKIYYRHSNYPGGLKSITAGELRAKNSRRLIETSVKGMLPKNTLGRKQFTKLNVYGGAEHPHAAQQPEVLDITNLI
24	AMQ97434.1	rpsB	30S ribosomal protein S2	0.9384	29312	4.93	Cytoplasmic	260	MAVISMKQLLEAGVHFGHQTRRWNPKMKKYIFTERNGIYIIDLQKTVKLVDAAYDYMKSVAEEGGVALFVGTKKQAQEAIKEEATRAGQYFVNHRWLGGTLTNWDTIQKRISRLKQINAMEEDGTFEVLPKKEVAGLNKERERLEKFLGGIADMPRIPDVMYIVDPRKERIAVQEAHKLNIPIVAMVDTNCDPDEIDVVIPSNDDAIRAVKLITSKMADAFIEGNQGEDQVVEEDFTEENTATSIEEIVDVVEGDNSSAE
25	AMQ97404.1	artM	peptide ABC transporter ATP-binding protein	0.8721	27448	4.92	Cytoplasmic	245	MAEKILVEHLVKKYGDNTVLNDINVSINEGDVVCIIGPSGSGKSTFLRCLNRLEEPSDGEIIIDGAHLMDKSTDINLVRQHIGMVFQHFNLFPHLSILENIILAPMDLKKESREEAEKKAIKLLQTVGLEDKKDMYPEMLSGGQKQRVAIARALAMNPDIMLFDEPTSALDPEMVGDVLNVMKKLAEQGMTMVIVTHEMGFAKEVANRVMFIDDGNFLEDGTPQQIFENPQNERTKDFLNKVLNI
26	AMQ96168.1	rplO	50S ribosomal protein L15	0.8391	15471	10.43	Cytoplasmic	146	MKLHELKPAEGSRQVRNRVGRGTSSGNGKTAGRGQKGQKARSGGGVRLGFEGGQTPLFRRLPKRGFTNVNRKDYAVINLDVLNRFEDGAEVTPVALVEAGIVKNEKAGIKVLANGELNKKLTVKAAKFSKAAQEAIEAAGGSIEVI
27	AMQ98211.1	prsA	peptidylprolyl isomerase	0.8234	36850	4.82	Membrane	336	MKKKSIILAATSALAVLTLAACSGDTNKDIATMKGGTITVSDFYDEAKLESSNQSLVQRMIIYKVFNNKYGDKVTDKQVDAEYDKQAKSLGDTFESQLEAAGYTKDTYKEYIRNNLAFEAGLKAHVDITDDDLKTAWKSFHPEVEAQIIKLSSEDEAKDVKKSADDGDDFSKLAKDKSTDTETKEDGGKVKFDSTTTTIPAEVKEAAFKLKDGEISDVITTTNPTSYATEYYVVKMVKNQNKGNDMDKYKDQLKDIATETKLSDNAFTTKVIGEELKDANVKIKDDAFENVLSAFTTTSSSTKDSSETTASTKSSDTKSTDSTKESSTEETTDSSK
28	AMQ97619.1	rplS	50S ribosomal protein L19	0.7852	13196	10.94	Cytoplasmic	115	MNPLIEELTKEQLRSDIPAFRPGDTVRVHAKVVEGTRERIQLFEGVVIKRRGAGISETYTVRKVSNGVGVERTFPLHTPRVAKIEVVRYGKVRRAKLYYLRALHGKAARIKEIRR
29	AMQ96145.1	rpsG	30S ribosomal protein S7	0.7211	17801	9.98	Cytoplasmic	156	MPRKGPVAKRDVLPDPIYNSKLVTRLINRVMVDGKRGIAANIIYNAFDLIKESTGNDPLEVFEQAMKNVQPVLEVKARRVGGSNYQVPVEVRPERRVTLGLRWVVNYARLRGEHTMEERLAKEIMDAANNTGASVKKREDTHKMADANRAFAHYRW
30	AMQ96688.1	manX	PTS mannose transporter subunit EIIAB	0.7176	35640	5.14	Membrane	329	MVGIILASHGQFAEGILQSGSMIFGEQENVKAVILKPSEGPDDLRAKLEEAVASFDNQDEVLFLVDLWGGTPFNQSNTLFEEHKDKWAIVSGLNLPMLIEAYASRFSMESAHEIAAHIIETAKDGVKVKPEELEPAEAPKAAVEDAQPKGALPEGTVVGDGKIKYVLARVDSRLLHGQVATAWTKAVQPNRIIVVSDAVSKDDLRKRLIEQAAPPGVKANVIPISKMIEVAKDPRFGNTKALLLFENPEDVLTAVEGGVDIKELNVGSMAHSVGKVVVSKVLSMGQEDVEAFEKLEQKGVKFDVRKVPNDSRDNMDDILKKAKAELAKA
31	AMQ97250.1	HMPREF1359_02858	penicillin-binding protein	0.6057	73705	4.88	Membrane	679	MKRSDKHGKNRTGAYIAGAVILIAAAGGGYFYYQHYQETQAVEAGEKTVEQFVQALNKGDYNKAAEMTSKKAANKSALSEKEILDKYQNIYGAADVKGLQISNLKVDKKDDSTYSFSYKAKMNTSLGELKDLSYKGTLDRNDGQTTINWQPNLVFPEMEGNDKVSLTTQEAARGNIIDRNGEPLATTGKLKQLGVVPSKLGDGGEKTANIKAIASSFDLTEDAINQAISQSWVQPDYFVPLKIIDGATPELPAGATIQEVDGRYYPLGEAAAQLIGYVGDITAEDIDKNPELSSNGKIGRSGLEMAFDKDLRGTTGGKLSITDADGVEKKVLIEHEVQNGKDIKLTIDAKAQKTAFDSLGGKAGSTVATTPKTGDLLALASSPSYDPNKMTNGISQEDY…
32	AMQ97702.1	tagU	transcriptional regulator	0.5646	35339	5.8	Cytoplasmic	314	MARRRRKSRGKKIFLIILAVLIVLVLAIVGVGAKLYLDLSHSIEKTYESVERTQGERTKPVDLNKQESFSVLLMGIDTGDLGRVDQGRSDTMMVATVSPEDKQTTIVSIPRDTYVDIVGRDTKDKINHAYAFGGAAMAMDTVQKYVDIPIDHYVSINMKGLKELVDAVGGIEVNNDLTFSQDGYDFTIGKITLNGDQALSYSRMRYEDPNGDYGRQERQRKIVEGVAKKVLSLNGVSNYQSVLNALESNMKTDMSFDEMKKIALDYREAFGTIKQDQLQGEGFMQDNISYQKVSDQELDRVKKELKDQMNLENK
33	AMQ96851.1	yhbY	RNA-binding protein	0.5636	11778	9.3	Cytoplasmic	103	MSLRGKQKRFLRSKAHHLQPIFQIGKGGINSAMIVQIEEALEKRELIKVSLLQNTDEIAEEAAQVLEKEIDCEIVQIIGRVIVLYKPSTKEKYQRLSKEVKAI
34	AMQ98511.1	AWT83_10685	phage tail protein	0.5593	20890	5.16	Membrane	190	MMATPDTVGEAPTYSEIVRLPIATKLGIKGNGTALEKWASSKMFRRVSRETKHELALDHVGIPIAVMDELKGLIAESGVTFGKNTAREFPYFAFGFIGNIENGGKKAVWYPKTQLSNVIDEEYATADDETKIDDVTANFISSGLKYNNVMYSSFDSNRDGASLELFNKFIAQPVYDEEQWKTLAKVGGAG
35	AMQ98071.1	HMPREF1359_02353	hypothetical protein AX771_11705	0.5479	65675	5.5	Cytoplasmic	585	MQETTSISKGGIVMAETQHKMVLSTTEPNNGINLVRIRQGDVLTQKFVVEVVEHGKLKTFEGLVPFFINTTKFGENQPVEQKVQEYSPAQARLVYTLSEPDWQWGGENTAHFSFRSLNGDGTWSEQFSTQDFTYRVISGISRSQLRDSGYVWTFEDLLRKFKDYMDQGKNDWEQWLEDNREILENIDPGGTIINILNEAKGDYESLADRLNQKYQVPVGSSQIRETTRFFDYDTMKYVDLVPRNLNTVVNSVNNSKFNFSFITDIHVDNHNLRIDGVGYKDASYLRHWRAIPQFQKLGNKTDVMIYGGDNIDGGLGSLGSDIGIIDEWSARHSMLGTLKRFTNAAVAGQEKPVIICKGNHDACFDPAWRKRKGMLCNADFEEYWNGLYGGVLFPDKNAA…
36	AMQ98510.1	AS238_11080	hypothetical protein AX771_08095	0.5018	63561	5.49	Cytoplasmic	565	MVLSTTEPNNGINLVRIRQGDVLTQKFVVEVVEHGKLKTFEGLVPFFINTTKFGENQPVEQKVQEYSPAQARLVYTLSEPDWQWGGENTAHFSFRSLNGDGTWSEQFSTQDFTYRVISGISRSQLRDSGYVWTFEDLLRKFKDYMDQGKNDWEQWLEDNREILENIDPGGMIINILNEAKGDYESLADRLNQKYQVPVGSSQIRETTRFFDYDTMKYVDLVPRNLNTVVNSVNNSKFNFSFITDIHADNHNLRIDGVGYKDASYLRHWRAIPQFQKLGNKTDVMIYGGDNIDGGLGSLGSDIGIIDEWSARHSMLGTLKRFTNAAVAGQEKPVIICKGNHDACFDPAWRKRKGMLCNADFEEYWNGLYGGVLFPDKNAAIYRFDTCDFYEGGTGDKYTD…
37	AMQ98085.1	HMPREF1359_00610	portal protein	0.5005	62681	4.69	Cytoplasmic	544	MEQNIQLLGQQRFDEEANLVYKVPVSQLPKIDMLDQQTGEVSEFINFKHEDMWKMIVGFIKHHRERQVPRLKELKRYLNADNNIKRRPNKPDGRADNRIASDFANFIVSFKQGVLLGNPISYNGDKVIVERINRFASESNEDYHNQLMSRDAFGLGRAYEWVGRDEYGKETIAKFDAEQTFVIYDNTKDRNSICGVHYFVEKFLDKSFTRIELYTNCGYNYYFTAKDDDLENAVLDEDGEVQSYFDTVQINEWINNEERTSDFEHVMDSIDAYDLSRSEMANFQQDSSEAYLVIKGNPDTADDQEGDNSKLAVFQAMMQARMLVLGDKKIYDNNVAGAEPDAYYLKKEYDVAGMEANDSRTVADILRFTSLIDFTDENIGSNQSGIGFRFKGWGSDNDR…
38	AMQ97058.1	pdhC	dihydrolipoamide acetyltransferase	0.424	57939	4.72	Cytoplasmic	547	MAYQFKLPDIGEGIAEGEIVKWFVKPGDTINEDDTLLEVQNDKSVEEIPSPVTGTVKNVIVPEGTVANVGDVLVEIDAPGHEDNEGDSGVAAESQTPAKPAAEPTVDTESAGSSSEGVFQFKLPDIGEGIAEGEIVKWFVKPGDTINEDDTLLEVQNDKSVEEIPSPVTGTVKNVIVPEGTVANVGDVLVEIDAPGHNSAPSTSAPSAEAPKEKVETSGSASVVEAADPNKRVLAMPSVRQFAREKDVDISQVTATGKGGRVTKEDIENFLAGGPSSAPAKSEAPEAAAPKEAAPAAESKPAAPAKPFKSNLGDLEERVAMTPTRKAIAKAMVNSKHTAPHVTLHDEVEVSKLWDNRKRFKEVAAANGTKLTFLPYVVKALTATVKKYPVLNASIDDAN…
39	AMQ97535.1	acrR2	TetR family transcriptional regulator	0.4172	21810	5.88	Cytoplasmic	188	MRRKVYTKDQILKAAYDVVAKEGFKGFTARNIAKKMGISTQPIYLEFKNMEDLKNTLLDSIFEQLKEDVFPIERTGDKIIDLGLNYIYFAKKHHSLYMASYIDEHGDGKKMHDFSYNYFREIVKEDERYNQLSDEYVDALHTGTWVAVTGLASLMSSNIMHPTEEQIIALIKRTIDSILALDNPEIIR
40	AMQ98527.1	HMPREF1359_02443	hypothetical protein AX771_10795	0.3971	24108	9.19	Membrane	214	MVQSLSTEQIKTKFSSNSSNLSAKDIQKNRLEYFKKNSDLIIGDIIFNDKDRAFLIKKSILMNRAQIIVKYDEIQTFTPIFLGGQIKKHHGITRALVGGALAGPIGALIGAGTGGKEWESINRLGIEIYLKDNRIIKYDLISNETKINSLIGKNSFDQYNHLSAKLESILSNQTSTSVEITSQIDEIRKYKELLDEGIISQKEFNEKKKELLNL
41	AMQ96159.1	rplN	50S ribosomal protein L14	0.396	13066	10.27	Cytoplasmic	122	MIQAESRLKVADNSGAREILTIKVLGGSGRKTANIGDVIVATVKQATPGGVVKKGDVVKAVIVRTKSGARRTDGSYIKFDENAAVIIRDDKSPRGTRIFGPVARELRENNFMKIVSLAPEVL
42	AMQ98016.1	lepB	S26 family signal peptidase	0.3651	21651	5.36	Membrane	189	MKEFLKNWGILILVLAAILLARVYVFTPVTVNGHSMDPTLSDGQRLISSKISNYERMDIITTKEPGDEERMIVKRIIGMPGDTVKMENDQLTINGKKYDEPYLDEFKKEFSEDKLQGEYAYSSGFQAQAESSSTFTSDFEYTVPKGKYLVLGDNRLISKDSRMFGLVDKDMIQGKVVFRYWPLSEIKIM
43	AMQ97452.1	AS238_11750	sulfurtransferase	0.3206	15062	9.78	Membrane	131	MVLWVINIILLLIVLAIILWEVYLRVMAKRSATTLTEEEFREGMRKAQVIDVREKDVFDAGHILGARNIPYTVLKDSLGSIRKDQPVYIYDQKKSLSIRTANKLRKAGYQEIYLLKGGYDGWSGKIKSKKV
44	AMQ98310.1	recA	DNA recombination/repair protein RecA	0.3203	37491	5.11	Cytoplasmic	349	MADDRKAALDAALKKIEKSYGKGSIMKLGEKIDQQISTIPSGSLALDVALGVGGYPRGRIIEVYGPESSGKTTVALHAIAEVQKNGGTAAFIDAEHALDPQYAQKLGVNIDELLLSQPDTGEQGLEIADALVSSGAVDIVVVDSVAALVPRAEIDGEMGDSHVGLQARLMSQALRKLSGSINKTKTIAIFINQIREKVGVMFGNPEITPGGRALKFYATIRLEVRRAEQLKQGTDIVGNRTKIKVVKNKVAPPFKIAEVDVMYGLGISQEGELLDMAVEKDIVDKSGAWYSYKEDRIGQGRENAKIYMANHPEMMAEVSALVRAAYGIGEEVAVPEDEKGQEELPLVEE
45	AMQ96135.1	yufO	heme ABC transporter ATP-binding protein	0.3072	57478	5.88	Cytoplasmic	520	MVQENIVIEMQNITKEFGTFKANDNINLQVKAGEIHALLGENGAGKSTLMNVLSGLLEPTSGKILMRGKEVKITSPTKANQLGIGMVHQHFMLVDAFTVTENIVLGSEPSRAGMLDHKKARKEIQKVSEQYGLSVNPDAYVRDISVGMEQRVEILKTLYRGADVLIFDEPTAVLTPQEIDELIVIMKELVKEGKSIILITHKLDEIKAVADRCTVIRRGKGIGTVNVKDVTSQQLADMMVGRTVSFKTMKKEAKPQEVVLSIENLVVKENRGLEAVKNLNLEVRAGEVLGIAGIDGNGQSELIQALTGLRKAESGHIKLKGEDITNKKPRKITEHGVGHVPEDRHKYGLVLDMTLSENIALQTYHQKPYSKNGMLNYSVMNEHARELIEEYDVRTTNEL…
46	AMQ98400.1	AS238_11210	manganese ABC transporter substrate-binding protein	0.2854	35626	5.29	Membrane	316	MMRKWKAVLGSLGILIALFIFGACSTNSKDKDTVASNEKLKVVVTNSILADITENIAKDKIDLHSIVPIGKDPHEYEPLPEDVQKTSKADLIFYNGVNLETGGNAWFTKLVKNANKEENKDYFAASDGIDVIYLEGQSEKGKEDPHAWLNLENGIIYAKNIEKQLAEKDPDNKKFYKENLDKYIEKLDSLDKEAKSKFASIPNDKKMIVTSEGCFKYFSKAYNVPSAYIWEINTEEEGTPDQIKHLVEKLRTTKVPSLFVESSVDDRPMKTVSKDTNIPIYSTIFTDSIAEKGQDGDSYYAMMKWNLDKIAEGLSK
47	AMQ96108.1	rpsR	30S ribosomal protein S18	0.2811	9106	10.98	Cytoplasmic	78	MAQQRRGGRKRRKVDYIAANHIEYIDYKDIELLKRFISERGKILPRRVTGTGAKNQRKITVAIKRARIMGLLPFVSED
48	AMQ96164.1	rplF	50S ribosomal protein L6	0.2774	19209	9.63	Cytoplasmic	178	MSRIGNKVVVIPEGVTVTQDGNNVTVKGPKGELTRTFSADIKMNIEGNEVTFTRPNDSKEMKTIHGTTRANFNNMVVGVSEGFQKALELIGVGYRAQLQGSKLVLNVGYSHPVEITPPAGVTVEVPANTQVIVKGANKEEVGELAANIRGTRPPEPYKGKGIRYVGEYVRRKEGKTGK
49	AMQ96439.1	AS238_04650	N-acetylmuramoyl-L-alanine amidase	0.2708	76828	4.87	Extracellular	714	MKNKKTIRLLAATWLIAPSVLSTNTVFAVDNQIADQTVTTDTTTSSSATSETTDSFTEDPTGTTNSTTGSTEPTEIDPADPSENEKPAETYSLTIAPSLIGKIQLTASTADSPEQQPLDITESGTVEGLLAETKVTYTITPAEGEQIASVAVNGAKEVNYDAKTFTVGTNNLSITAEFKAGPDTSTEKPTDPSEEVPSTPDPETPNKPDVGNNNNNNGSNNSNNNNNNSNSGNSSNQTNPSGSNNNGNTQREPNHPNNGSSNGGTNNASSRPNTANQSGIENPSSASSDFVVKSPIDAVLPTNTTNVQQAIVREAFKHLGKPYVWGAKGPNTFDCSGLTYYVYMKATGHYIGGWTGEQQYAGTQIPVSQAQPGDLVFWGPSSGVTHHVGIYIGNGQFIH…
50	AMQ98070.1	HMPREF1359_02352	hypothetical protein AX771_11700	0.2702	29539	5.74	Cytoplasmic	260	MLDFQSKPNIFEEMSYEEAVKWLLRQAAIHYDGSDHDAHVLATESNAGFATPETVMQARGRWLRDYKLPQKYPNILDIPPGKYATKAGWGANNPGGIEDDSFVEMMVFADHDLRKLIVAFARYSGEIYIKMTHNSDPVEGYNSLGWRRVYTTSVLFEGELRKGQSVNLPDDTFRYQTLRIHYTDGDGDFIEEIKRQRYARITKANLWNGDAGVTFIEFELTIEARKITMSNGRVLNISSGNVSNPAMSNDVKITKIEGVK
51	AMQ96690.1	manZ	PTS mannose family transporter subunit IID	0.2635	33185	9.26	Membrane	304	MAEEKIKLSKKDRLAVAWRSTFIQGSWNYERMQNGGWAFSMIPAIKKLYKTKEERSAALKRHLEFFNTHPYIASPILGVTLALEEERANGAPVDDVAIQGVKVGMMGPLAGVGDPVFWFTVRPMLGALGASLAMGGNILGPIIFFLGWNIIRWAFMWYTQEFGYKAGSKITDDLSGGLLQDVTKGASILGMFVLAALVQRWVSIKFLPVVSTVKLDKGAYIEWDKLPSGGEGIKSAFEQVNNGLALSPEKVTTLQDNLDQLIPGLAALGLTLLCMWLLKKKVSPIVIILGLFVVGVVGHVIGLL
52	AMQ96437.1	macB	bacitracin ABC transporter ATP-binding protein	0.2596	27619	6.23	Cytoplasmic	250	MNKIVEVQNVTKVYGKNNEKKTQALSGISFDVEKGEFIGIMGASGSGKSTLLNILSTLDKPTDGHIRINQKDVTTLKGNQLADFRANEIGFIFQDFNLLESLTAQENIAVPLSLQGVRPKEIKQRVQKIAERLSISHILESYPSEISGGQKQRVAAARALITQPTILLGDEPTGALDSKSARDLLDTMDELNTKDHVSILLVTHDPFSASYCQRILFIKDGGIHQEVKRGDQSRDSFYREILSILGNLEQ
53	AMQ96764.1	tsh	phage tail protein	0.2542	22138	4.88	Cytoplasmic	202	MAKTKTVVTTFDNVSIKRIAFNFKNAGNAIATNCNGQLDGETEMQTVVKKCGATEVKSKSKPINMTVTITAHVPMEVYRRFNGLKQDGRIKPGIYSYGPDSVGEDFSLAAEIVDDFEENRKLVGMLACTSNTGLTFSIENGADEVAALELETKVMQDEFGKFYHEAIVAELEEDLTDQWMTNLSADVIKKTSVVTTTATQSQ
54	AMQ98432.1	AS238_00635	FMN-binding protein	0.2534	33664	4.67	Membrane	311	MKKKRFVTGFAVLAFSALVLGACGADDNGSSNSSSESSTAQSSTAKSTTESSAKVVAGGDLQDGTYKLEEKNYSNGYRAVFEMVVKDGKITESKYDNVNENGESKTKDAEYNKNMEAKSGTNPEKYIPELNDQFLKAQSASGVEVVTGATHSSESFQNYAQQLIQAAQAGNTDTIEIDNGADLKDGTYKLEEKNYSNGYRVQFEMTVAGGKVTESNFDYIDKDGKSKQDDTEYNENMKAKSGTEPKTYIPTLNDEFVKAMGEEDGSPANVEVVTGATHSSHSFIMYAQQLVNAAEKGDTQTIEVDNIVTEK
55	AMQ96238.1	rpsO	30S ribosomal protein S15	0.2497	10616	10.12	Cytoplasmic	89	MAISKERKNEIINEYARHEGDTGSPEVQIAVLTEEINHLNEHARVHKKDHHSYRGLMKKVGHRRNLLAYLRKTDVQRYRELIKRLGLRR
56	AMQ96165.1	rplR	50S ribosomal protein L18	0.2489	12972	10.18	Cytoplasmic	118	MITKPDKNKTRQKRHRRVRNNISGTAERPRLNVFRSNKNIYAQIIDDVAGVTLASASTLDKEISGGTKTEAAQAVGKLVAERAAEKGIKVVVFDRGGYLYHGRVQALAEAARENGLEF
57	AMQ98404.1	rpsI	30S ribosomal protein S9	0.2406	14336	10.55	Cytoplasmic	130	MAQVQYIGTGRRKNAVARVRLVPGTGKITVNKKDVEEYIPHADLREVINQPFAVTETKGAYDVFVNVNGGGYAGQSGAIRHGIARALLEVDPDFRLALKRAGLLTRDARMVERKKPGLKKARKASQFSKR
58	AMQ97057.1	pdhB	2-oxoisovalerate dehydrogenase	0.2383	35494	4.62	Cytoplasmic	325	MAQKTMIQAITDALALELENDENVVVFGEDVGKNGGVFRATEGLQEKFGEDRVFDTPLAESGIAGLSFGLALEGFRPVPEIQFFGFIFEAMDEVVAQMARTRYRMSGTRNLPITIRSPFGGGVHTPELHSDNLEGLIAQSPGIRVVIPSNPYDAKGLLISSIRSNDPVVFLEHMKLYRSFREEVPDEAYEVPLDKAAVTREGTDVSIITYGAMVREAIKAADNLAKENISVEIIDLRTVAPLDVETIIQSVEKTGRVVVVQEAQRQAGVAAQVVSEISERAILSLEAPIGRVSAPDTVFPFGQAENVWLPNAKDIEDKVKEIAEF
59	AMQ97737.1	smc	hypothetical protein AX771_09720	0.2295	58654	4.81	Cytoplasmic	522	MKERERILDLVKKGILSTEEGLDLLESMATEKDEKQIKKEADKVTASHKEKDQASQLIDKLENGEEEISEPVDPKERERQDQENLEKILDELATEANKTSARLDEVNAQFADNKAARNEKQEALMQLNTKEELGELTEEELAQRQTLEADIKELEASGDTLLEEQLKLEAELKDIRKNQWSEKKETFTDKFELPDDWKDQATDTLNQVGEKMSEAGSQLGKFLKKTFQTVSETVNDNMEWKDVSLRVPGIATTKFEHEFYYEAPAASILDIKAANGNVTLKTWDSNDVKVEAKIKLYGKMGAEPFEAFSERSQIEVNEDHISFQIPNKRVRADLVFYLPKRVYDHAAIKLLNGNIMIETLEAKDIYTKSTNGNIIVDQLTATMLEVEGVNGNIDIRNGN…
60	AMQ98076.1	HMPREF1359_00599	hypothetical protein AX771_11750	0.2073	12703	6.6	Cytoplasmic	108	MRYDTEVTFVIEKDGYYDPELGEHVEPTLDEKIKLANVTDLGTDRSKVLFGDIKQGAKVIRLLRPYTKEWDYVLIFNKLKSKTEKFEIITERNLRLKNTFIVQEVIAK
61	AMQ97765.1	atpD	ATP synthase subunit beta	0.2054	51022	4.66	Cytoplasmic	468	MSSGKIVQVIGPVVDVEFSLDQSLPDINNALVVYKNDENKSKVVLEAALELGDGVIRTIAMESTDGLQRGMEVIDTGKAISVPVGKETLGRVFNVLGDTIDLETPFPEDAERSEIHKKAPAFDELSTSTEILETGIKVIDLLAPYLKGGKVGLFGGAGVGKTVLIQELIHNIAQEHGGISVFTGVGERTREGNDLYYEMKDSGVIEKTAMVFGQMNEPPGARMRVALTGLTIAEYFRDVEGQDVLLFIDNIFRFTQAGSEVSALLGRMPSAVGYQPTLATEMGQLQERITSTKKGSITSIQAIYVPADDYTDPAPATAFAHLDATTNLERKLTEQGIYPAVDPLASSSSALAPEIVGEEHYKVATEVQHVLQRYRELQDIIAILGMDELSDQEKVLVSR…
62	AMQ96515.1	telA	tellurite resistance protein TelA	0.203	45067	4.97	Cytoplasmic	398	MDHKPTETKDVTPVNDTLEDLLNNPFSTPTDTLTTSQQAEIDQLQEQQTAARLIDKLPAERQEQAKQLAAKIDANDAQSVISYGSAAQAKLSEFSQSMLNHVQAQDIGPVGDSLTELMYRLQEANPDELRAGEGNIFQRVFGKVKQSIYEVTAKYQKIGAQIDKISVKLDKEKDGLLKDNLMLEQLYQKNKDYFDALNIYIAAGELKMEELQTTIIPEAMKRAEETGDQMDVQIANDYTQFLDRLDKRTHDLRLARQITIQQAPQIRLIQNTNQALAEKIQASIATAIPLWKNQVVIALTLLRQKDAVTAQRQVSETTNDLLKKNSEMLKISAIETAKENERGIVDIETLQTTQNDLIETIQETLRIQKEGKEKRRHAEVELGHMEEDLKQKLLDLTQ
63	AMQ98006.1	upp	uracil phosphoribosyltransferase	0.199	22917	4.98	Cytoplasmic	209	MGKFQVIDHPLIQHKLTIIRDKNCGTKVFREVVDEIAMLMAYEVSRDMPLEDIVIETPITETTQKTLSGKKVAIIPILRAGIGMVDGILELIPAAKVGHIGLYRDEETLEPHEYFVKLPEDIDARQLFVVDPMLATGGSAIMAIDALKERGASNIKFVCLVAAPEGVKALQEAHPDIDIYTASLDEKLNEHGYIVPGLGDAGDRLFGTK
64	AMQ96482.1	psaA	manganese ABC transporter substrate-binding protein	0.1985	35391	4.75	Membrane	316	MKTKKSLFLILAVSFLVLAGCGKQASDQADEGSKEKLSVVATNSILADMAKEVGTDQIDIHSIVPVGTDPHEYEVLPEDIKKASDADVILYNGLNLETGNSWFDNLMETAKKEEGKDYFAVSKNVEPLYLTSGEEHTKADPHAWLDLSNGIKYVEEIARIFSEKDAENATLYKKNAEAYVEKLKELDTQAKESFASIEENKKLLVTSEGAFKYFSRAYDLPAAYIWEINTESQGTPDQMKAIIDQIRAKEVPVLFVETSVDSRSMERVAKETGLKIYDKLFTDSIAKEGEQGDSYYQMMKWNIETIHEGLSQTKES
65	AMQ98271.1	ftsH	cell division protein FtsH	0.1926	77546	5.25	Membrane	703	MNKKNNGMMKNALYYVLVILAMVMVVYFIFGNNGQRSSDIEYSKFTEQLQAGKIKEFEVQPANGVYKITGEYKEQQTVANSGGLAILGSTDTTTTHFTTIILPNDTTLSQVTELAKENKVATTVKEESSSGIWVSLLLSFLPIVIIIFFFYMMMGQQGGGGGGGGRVMNFGKSKAKEADKKANRVRFSDVAGAEEEKQELVEVVEFLKDPRRFVELGARIPAGVLLEGPPGTGKTLLAKAVAGEAGVPFYSISGSDFVEMFVGVGASRVRDLFETAKKNAPAIIFIDEIDAVGRQRGAGMGGGHDEREQTLNQLLVEMDGFDGNEGVIVIAATNRSDVLDPALLRPGRFDRQILVGRPDVKGREAILRVHARNKPMADDVDLKVVAQQTPGFAGADLEN…
66	AMQ96541.1	metQ	methionine ABC transporter substrate-binding protein	0.1887	30966	4.78	Membrane	282	MKKKIFGFAAALLLTVGLAACGNNSDSKDSANKADDTTLKVGASPTPHAEILEHVKPLLKDEGIDLEIVKFDDYVLPNQSLEEGDIDANYFQHIPYLNKEIKEKGYDFVNAGAVHIEPMGLYSKKVKDVSELKDGATIITSNSESDWGRIITILQDAGLVKVKDGVDLETATFDDIEENPKNLKFNHTIDPSLLASTYQNDEGDLVAINANFAYGAGLNPLEDAVLLEKDNSPYVNIIATRKGDEDSDKIKKLIEVLHRKEVQEWITDKWGGSVKPVKADAK
67	AMQ96843.1	fabG	beta-ketoacyl-ACP reductase	0.1846	26114	7.67	Cytoplasmic	245	MDVKGKNVFITGSTRGIGKAMALAFAKAGANIILNGRGEIPKEKIEEIEAFGVKCVGVSGDISDYEKAGQMIKEAEEKLGSIHVLVNNAGITNDKLVMRMDAEDFKKCLDINLIGTFNMTQHVLKKMMKQREGAIINLSSVSGLIGNIGQANYAASKAGVVGLTKSVAREAATRGITCNAIAPGFITTDMTEVLADKVKEQAEKQIPMQRFGQVEDIAQTAVFLAQNPYITGQVINVDGGLVMHG
68	AMQ96150.1	rplD	50S ribosomal protein L4	0.1782	22530	9.99	Cytoplasmic	207	MPNVALFKQDGSQNGEITLNEEIFGIEPNESVVYDAIVMQRASLRQGTHAVKNRSAVRGGGRKPWRQKGTGRARQGSIRSPQWRGGGVVFGPTPRSYSYKLPKKVRRLAMKSVLSEKVAENNLVAIEGLNFDAPKTKEFKQVLANLSIDSKVLVVLEKGNDFAALSARNLPNVSVVTSDNVSVLDVVSNTKVLATQTALTQIEEVLA
69	AMQ96156.1	rplP	50S ribosomal protein L16	0.1761	16135	10.44	Cytoplasmic	144	MLVPKRVKHRREFRGKMRGEAKGGKEVAFGEYGLQAVDSHWITNRQIEAARIAMTRYMKRGGKVWIKIFPHKSYTAKAIGVRMGSGKGAPEGWVAPVKRGKIMFEIAGVPEEVAREALRLASHKLPMKTKIVKREEMGGESNEG
70	AMQ98633.1	AWT83_15985	hypothetical protein AX771_14680 (plasmid)	0.1734	24119	5.16	Extracellular	214	MENKTLKIVLTAAISVSLIGNIALFWQLKEEQATNTYKIEEVAKNASEKLKKNSSSAQAKIDKLNQTINEKNQEIDQLKQQDGTKAKEEVNEAQSKTAEEFGKLAIDKSLSRNELTEKLKDVATQEVIDKLSPADDDHQHDDYGSYSFTLGDVQTYAQTSSVKEEQNFVVFVDYTIGNPQFKDVKPQKIKGGLTVTEKQVDGQWKVTDFSYFTR
71	AMQ97094.1	yxeA	hypothetical protein AX771_05890	0.1703	13693	6.15	Cytoplasmic	123	MKVIKYLIGLAAISGILLFGLKYYTEGSYGEIPGILDQLNPLVEKGEVYVKTQKPEEVNEYGTARYVQKAADANGKERTVEFNGLSVLKENHYLKISNKGAHIETYEEVPREKVPEKALAIIG
72	AMQ96770.1	AS238_14555	hypothetical protein AX771_03920	0.1668	11053	8.09	Membrane	97	MINLGEWGAIAGSITAIVSLILLVIKPITASFSKITETLSKVSHNLDLLTKDLESSKSDRLMIHEELKKHDERLDTHAEKLVEHTQQIKTLFRERRK
73	AMQ97781.1	eno	enolase	0.1602	46482	4.61	Cytoplasmic	432	MSIITDVYAREILDSRGNPTIEVEVYTESGAFGRGMVPSGASTGEYEAVELRDGDKARYGGKGVTKAVDNVNNIIAEAIIGYDVRDQMAIDKAMIALDGTPNKGKLGANAILGVSIAVARAAADYLEVPLYHYLGGFNTKVLPTPMMNIINGGSHADNSIDFQEFMIMPVGAPTFKEALRMGAEVFHALASILKARGLATSVGDEGGFAPNLGSNEEGFEVIIEAIEKAGYVPGKDVVLAMDAASSEFYDKEKGVYVLADSGEGEKTTDEMIKFYEELVSKYPIISIEDGLDENDWDGFKKLTDVLGDKVQLVGDDLFVTNTQKLSEGIEKGIANSILIKVNQIGTLTETFEAIEMAKEAGYTAVVSHRSGETEDSTISDIAVATNAGQIKTGSLSRTD…
74	AMQ98337.1	AS238_11495	mannosyl-glycoprotein endo-beta-N-acetylglucosamidase	0.1583	46765	4.79	Membrane	422	MKAKNLLFSVILLGNLAVANTTVLAEESTETVATQTSSSSETGIENDTESTLQSATVSENTISTEEPTTETTEQTQTEDSTSAEAQNNPENAEEITNQLTDGQTLTHTHQADLSEFENYTGYAFYARSSANSQQAFIDSIASTAQSLASANDLYASVMIAQAIVESGWGNSTLASAPNYNLFGIKGSYNGQSVTMPTSEYVNGQWITVNAAFRKYPSYKESLQDNVTVLKTTSFQPGVYYYSGAWKSNTNSYKDATAWLTGRYATAPNYGSTLNNVIETYNLTQYDTAPTSTSPMYRLYNRHTGEHLYTLNAGEKNYLPTVGWEYEGIAWQAPNSGQPVYRLYNPYSGDHHYTMAQSEINSLTKIGWRYEGLSFYSGGSKPIYRLFNPNEKTGTHHYTL…
75	AMQ97370.1	fruAB	PTS fructose transporter subunit IIC	0.1556	67578	5.33	Membrane	643	MNIKDLMVKEAMIMDLQATDKKGAIDEMVQKMFDAGRISDIETYKEGILAREAQTSTGLGDGIAMPHAKNSAVKEATVLFAKSQKGVDYEALDGQPTYLFFMIAAPEGANDTHLQALAALSRLLIDADFVGKLKEANTPEEVQDLFQTAEEQKEAEEKAEQETQAAEASAHPERKFVVAVTACPTGIAHTYMAEDALKKKAKEMGVEIKVETNGSEGIKNRLTAEDIARAEGVIVAADKKVEMNRFDGKELINRPVSDGIRKPEELINLALSGTAPVFHGDGKESSSEEGNADGTIGQRIYKDLMNGVSHMLPFVIGGGIAIALSFMIDQFIGVPHDQLSNLGNYNQAASWFNQIGQAAFGFMLPVLAGFIASSIGDRPGLIVGFAAGALANTGGAGFL…
76	AMQ97056.1	pdhA	pyruvate dehydrogenase (acetyl-transferring) E1 component subunit alpha	0.1493	40872	5.45	Cytoplasmic	369	MANKKAPIDFQALLDEVNADFPVYQALDQDGNVVNKDLVPDLSDDELVELMTHMVWSRVLDQRSTALNRQGRLGFFAPTAGQEASQLASAYAFDKEDVLLPGYRDVPQLVKHGLPLSQAFLWSRGHAAGNSYPEELKALPPQIIIGAQYVQAAGVALGLKKRNKKNVVFTYTGDGGSSQGDFYEAINFAGAYHANAVFYIQNNGYAISTPREKQTAAKTLAQKAVAAGIPGIQVDGMDPLAVYTVSKMAREWAISGNGPVLIETLTYRYGPHTLSGDDPTRYRTKDTDDDWQKKDPLIRFRKYLTEKGLWSEEKEEQVIEATKEEIKAAIAEADKVPKQKVSDFLKNMFEVSPQSIKEQIAIYEAKESK
77	AMQ96709.1	ftsZ	cell division protein FtsZ	0.1439	44306	4.69	Cytoplasmic	413	MEFSIDNNINDGAVIKVIGVGGGGGNAVNRMIEENVKGVEFITANTDVQALKNSKAETVIQLGPKYTRGLGAGSQPEVGQKAAEESEQSLREALDGADMIFITAGMGGGTGTGAAPIVAGIAKELGALTVGVVTRPFTFEGPKRGRFAAEGIARLKENVDTLLIISNNRLLEVVDKKTPMLEAFREADNVLRQGVQGISDLITAPGYVNLDFADVKTVMENQGTALMGIGVASGEDRVVEATKKAISSPLLETSIDGAEQVLLNITGGLDMTLFEAQDASDIVANAATGDVNIILGTSINEEMGDEIRVTVIATGIDESKKERKSSRPARQAQMQSPAQKTVLDMDQAKPTSSEEENSFGDWDIRREQNVRPRVDDSNFDNIEKKEFDTFNREETKSHG…
78	AMQ97801.1	atpB	ATP synthase subunit B	0.1361	51058	5.15	Cytoplasmic	458	MIKEYRTIGEVVGPLMAVEKVAGVKYEELIEVRMQNGEIRRGQVLEVQEDKAMVQIFEGTSGINLRDSSVRFLGHPLELGVSEDMIGRVFDGLGRPKDNGPEILPEKHLDINGEVINPVARDYPDEFIQTGISAIDHLNTLVRGQKLPVFSGSGLPHKELAAQIARQATVLDSSDDFAVVFAAIGITFEEAEFFMEDFRQTGAIDRSVMFMNLANDPAIERIATPRMALTAAEYLAYEKGMHVLVIMTDMTNYAEALREISAARREVPGRRGYPGYLYTNLATLFERAGRIRGLKGSVTQIPILTMPEDDKTHPIPDLTGYITEGQIILTRELYKSGIQPPIDVLPSLSRLKDKGTGPGKTREDHAATMNQLFAAYAQGKQAKELAVVLGESALSDVDK…
79	AMQ96175.1	rpoA	DNA-directed RNA polymerase subunit alpha	0.1361	35148	4.99	Cytoplasmic	312	MIEFEKPRIAKIDEEKDYGKFIVEPLERGYGTTLGNSLRRILLSSLPGAAITNIQIDGVLHEFSTIKGVREDVTQIILNIKGLALKMYGQEEKTLEIDITGPATVTAGDIIVDSDVEILNKDMYICSVSEGATFHARLTVKPGRGYVQADENKKEDMPIGVLPVDSIYTPVRRVNYQVENTRVGHREDFDKLTMEIWTDGSIEPLEAMSLSAKIMTEHLDIFVNLTDEAKNAEIMVEKEETQKEKMLEMTIEELDLSVRSYNCLKRAGINTVQELTNKSEPEMIKVRNLGRKSLEEVKAKLHDLGLGLRKED
80	AMQ98300.1	prs	ribose-phosphate pyrophosphokinase	0.1349	35251	8.66	Cytoplasmic	323	MSKHYFDPRLKIFALNSNRPLAEKIAAAVGVELGKSSVTQFSDGEIQVNIEESIRGSHVYVIQSTSSPVNDNLMELLIMIDALKRASAKTINVVMPYYGYARQDRKARAREPITAKLVANMIQKAGATRMLTLDLHAVQIQGFFDIPVDHLMGAPLIANYFLEKGIKGDDVVVVSPDHGGVTRARKLAEFLKSPIAIIDKRRPKANVAEVMNIIGQVKGKTCVLIDDMIDTAGTITLAANALKEAGATSVYASCTHPVLSGPALQRIEDSAIERLVVTDSIYLPEDRKIDKIDEVSVGGLMGDAIKRIHENKPVSPLFETKNK
81	AMQ97470.1	AS238_11085	hypothetical protein AX771_08090	0.1348	29510	5.75	Cytoplasmic	260	MLDFQSKPNIFEEMSYEEAVKWLLRQAAIHYDGSDHDAHVLATESNAGFATPETVMQARGRWLRDYKLPQKYPNILDIPPGKYATKAGWGADNPGGIEDDSFVEMMVFADHDLRKLIVAFARYSGEIYIKMTHNSEPVEGYNSLGWRRVYTASVLFEGELRKGQSVNLPDDTFRYQTLRIHYTDGDGDFVEEVKRQRYARITKANLWNKSAGMTLIEFELTIEARKITMSNGRALDISSGNVSNPAMSNDVKITKIEGVK
82	AMQ98646.1	HMPREF1359_00224	sortase (plasmid)	0.1345	25207	6.33	Membrane	223	MKKWLFGFLGVALIVFCSVFGYVSYQKHEGEVFKQNIEKKMPIDQINEHAKSYKEDATNVNNDMSLGQMLSIQKEAIEMGVNKQAFAQIQIPALGLTLPIFKGANQYTLSLGAATYFYEDAEMRKGNYVLAGHNMEIPGVLFSDIQKLSLGEVMDLVSNDGVYRYKVTRKFIVPEYFKLIDGVPEENSFLSLPKKGEKPLLTLFTCVYTSQGKERYVVQGELQ
83	AMQ96174.1	rpsK	30S ribosomal protein S11	0.1306	13727	11.28	Cytoplasmic	129	MAAKKVNRKRRVKKNIEAGIAHIHSTFNNTIIMITDTHGNALAWSSAGSLGFKGSKKSTPFAAQMAAETATKAAMEHGLKTVEVTVKGPGSGREAAIRSLQATGLEVTAIRDVTPVPHNGARPPKRRRV
84	AMQ98441.1	HMPREF0351_12691	hypothetical protein AX771_14085	0.1303	25583	9.6	Membrane	231	MEPEQLRAIVKENNSLETKLTKRNQQYIFDLKKSLEAANLSEEEKVKALHDILPTLVAEQKGGRTARQLFGTVSERTEAIINKPAEVKNSSTPLLMWLDNTLLLLGLLSIMIAITGLFSRGTTPAYGFSTLVLGSAIGGWVFYMMYKYIYQYEYPGADRSKKPGMGKTLLILGGTTLLWVVLFSATTLLTPVINPVLDPVVVIIIGATALAIRYYLKKKYGIIGSLSVPRR
85	AMQ97111.1	fabI	enoyl-ACP reductase	0.129	25668	5.19	Membrane	240	MGVANKKSIAWGCAEAMLKQGAEIIYTYQNERMKKSLVKLVGEEAFTVECDVSSDESIEKAMNAIGEYAGEIHGLVHAVAYANKEELSGNVSDISRDGYQLAQDISSYSLIAVSKYAQPFLAPNSGIVSMTYLGSERAIPNYNMMGIAKASLEAAIRYLAAEFSPKGIRVNGISAGAIKTLAVTGVKDYQKLIQLSESRTPDQQGVTIEEVGNACAFLISPLSSGIIGDIIYVDKGVHLS
86	AMQ97464.1	asnB	asparagine synthetase B	0.1287	72882	5.39	Cytoplasmic	631	MCGIVGFVNDKDNKKTIINTMMDRIVHRGPNSSGEYIDKHVALGFRRLSIIDLEGGTQPIYNEDRTKIIIFNGEIYNYQPLREELIAAGHVFQTHADTEVLLHGYEEWGTELLQKIRGMFAFAIWDNEKNELFGARDHFGIKPYYYAEMNGTFMFGSEIKSFLPHPDFNKELNKEALKPYMTFQYSPLNGETFFKDVYRLPEGHYYTYKDGKIDIQQYWDADFETKETHSRQEWIEKIDETVQASIEAHTVSDVEVGSFLSSGVDSSYVTSVLKPDHSFSIGFDDKTYNEAIEARKLTELLDLDNTAAVIDGDMSFKAFPLIQYHLDEPDSNPSCVPLYFLANLASQSVRVVQSGEGADELFAGYQTYGFHTNSKFIRVIAQGLKKLPKGTRYNLGRKI…
87	AMQ98797.1	ermB	SAM-dependent methyltransferase (plasmid)	0.1273	28751	9.8	Cytoplasmic	245	MNKNIKYSQNFLTSEKVLNQIIKQLNLKETDTVYEIGTGKGHLTTKLAKISKQVTSIELDSHLFNLSSEKLKLNIRVTLIHQDILQFQFPNKQRYKIVGSIPYHLSTQIIKKVVFESHASDIYLIVEEGFYKRTLDIHRTLGLLLHTQVSIQQLLKLPAECFHPKPKVNSVLIKLTRHTTDVPDKYWKLYTYFVSKWVNREYRQLFTKNQFHQAMKHAKVNNLSTVTYEQVLSIFNSYLLFNGRK
88	AMQ97460.1	feuA	ferrichrome ABC transporter substrate-binding protein	0.1239	35070	4.86	Membrane	318	MKLKTKVFTLSSILLLAGVLSACSPSSDKETATTANSTTSSNSTHTVTDTLGHKVEIPNAPKRIIGSYLEDYLIALGEKPIAQWTVGSGSIQDYLQDDLKDVPTISYDLPYEKVLSFEPDLLLISSSATVEGGKYEQYSKIAPTYVVKNGTDVTWEEQLKDVGKALAKEKEAEKIISDYQKSIKKTREELADKIENKTAAVLWVTNNSAFMVSKNRSSGRIVYDDLEFGVPDLVEEVSKKATSDWSAVSSEKLAELDADYIILVNSDKDAAMFNEPSWKNLKAVTDNHVLQFGPESSWLYNGPIASQEMVNDIKEKLN
89	AMQ98740.1	BU192_01090	hypothetical protein AX771_15245 (plasmid)	0.1209	32459	4.79	Membrane	288	MKKLRVIATIPMIFSFALLLSACGKEEAGAKSNEAHNISFIDSAEQKDSRCWLVVETSSKNKTPIDKNEYVKAVIQTKDGKAKVFKTDMEQLTLEKVSKMSDEEIIEQALNADKQKFNDKKKSDIDSYNATLDSVKTELENEEKQEFQNDQKIADFQDSIPKIQADIEEIDGVQYSEPEWKMVSATIKMDNENKSPSMETVKLSYKYLDSPIWNLNSFGEVSSEGELSYESTSMDLKLSIPVATTKVLDNFYSGYSNDELDQLLLTKVASKDNKVQLDSKGKNVSIVE
90	AMQ98195.1	uspA	universal stress protein UspA	0.1201	17360	4.93	Cytoplasmic	159	MLQQYKKIMVAVDGSDEAELAFKKAVNVAIRNNGELLLAHVIDTRSFQTVSSFDGMLAEQATEMAKQTLADYESNAKKAGLNNVTSVVEYGSPKQIIAREIPEDNQVDLIMLGATGLNAVERLFIGSVSEYVIRNAACDVLVVRTDLENQLPAKDHTKA
91	AMQ96711.1	sepF	cell division protein	0.1188	21973	6.54	Cytoplasmic	199	MPLLNRGAIANFFGLADEEEYEYQDYPETTKKAVQPTKKNTTQNQSTHSVSAANTHEKQKTATSRPVTHESIQPAEKKKVIELHQSPTKTVAKERTASRTSTQPKANLAGKITVMEPRAYSEAMAIAKRIIAGEATLVNFHLVEEKQARRIVDFLTGTVYALDGDIKRVGDEIFLCTPTGMEIDSSTAQSFADANLFDL
92	AMQ97750.1	secA	preprotein translocase subunit SecA	0.117	95832	5.39	Cytoplasmic	844	MANLIRSLIENDKKELKRLDSIAKKVEAYADQMAALTDEQLQAKTAEFKGRYQKGETLDQLLPEAFAVVREAAKRVLGLYPYHVQLMGGIVLHDGNIPEMRTGEGKTLTATMPVYLNALTGEGVHVVTVNEYLATRDSTEMGELYNFLGLTVGLNINSKSSDEKREAYNCDITYSTNNELGFDYLRDNMVVYRHQMVQRPLNYAIVDEVDSILIDEARTPLIISGQAEKSTALYTRADNFVKRLKEEEDYKIDVQSKTISLTEAGIEKAEETFGLDNLYDIENTALTHHLDQALRANYIMLLDIDYVVQDGKVLIVDQFTGRIMDGRRYSDGLHQAIEAKEGVEIEDETKTMATITFQNYFRMYKKLAGMTGTAKTEEEEFREIYNIQVYQIPTNRPVI…
93	AMQ98419.1	rpoC	DNA-directed RNA polymerase subunit beta~	0.1149	136798	6.54	Cytoplasmic	1217	MIDVNKFESMQIGLASPEKIRSWSYGEVKKPETINYRTLKPEREGLFCERIFGPTKDWECACGKYKRIRYKGIVCDRCGVEVTRSKVRRERMGHIELAAPVSHIWYFKGIPSRMGLVLDMSPRALEEIIYFASYVVIEPGNTNLEKKQLLTEREYREKREQYGQEFQAAMGAEAIKQLLDNVDLDAEAAELKEELKSAQGQKRTRAIRRLDILEAFRASGNQPSWMVMDVIPVIPPDLRPMVQLEGGRFATSDLNDLYRRVINRNNRLKRLLDLNAPGIIVQNEKRMLQEAVDALIDNGRRGRPVTGPGNRPLKSLSHMLKGKQGRFRQNLLGKRVDYSGRSVIVVGPFLKMYQCGLPKEMAIELFKPFVMRELVQRELASNIKNAKRKIERQEDEVWD…
94	AMQ97962.1	rnj	Zn-dependent hydrolase	0.1145	62564	5.53	Cytoplasmic	559	MSTIKIIPLGGVRENGKNMYVAEVGEDIFILDCGLKYPENELLGIDVVIPDFTYLEENIDRVAGVFLTHGHADAIGALPYLLSKISVPVFGTELTIELAKLNVSRNEAAKGFKDFHVVDEHTEIDFGETVVSFFRTTHTIPDSVGINLKTKEGSIVYTGDFKFDQTAIPMYQTDYARLAEIGKEGVLALLSESANAENPQPVASEAQIADEVFDTIKYWEGRIIVACVASNLQRVQQVLDAAEKAQRKVVLTGQDFERIIRTAMRLEKLQLPSEDLLVTLKDMKNYDPEELIILETGRMGEPIKSLQKMANGTHRNVKIEEGDLVYITTTPSIAMETIVAKTEDIIYRAGGTVKLISENMRVSGHANPNDLQLMINLMKPTYFVPVQGEYRELAAHADL…
95	AMQ96670.1	nrdD	anaerobic ribonucleoside triphosphate reductase	0.1122	83456	6.09	Cytoplasmic	729	MKVNYEEKTVVTQQPETSQMKVIKRDGRHVDFDEQKINEALIKAEKKIHGSLSPLTYEKIQMIADLVVQEIKSRFAENVKIYEIQNIVEHILLEKNEYELAEEYINYRTKRDFARSKATDINFSIEKLINKDQTVVNENANKDSNVFNTQRDLTAGIVGKSIGLKMLPPHIANAHQKGDIHYHDLDYHPYTPMTNCCLIDFKGMLNNGFKIGNAEVESPKSIQTATAQISQIIANVASSQYGGCSADRTDELLAPFAELNYKKHLKDAEEWIDSPERQKEYAKAKTKKDIFDAMQSLEYEINTLFTSNGQTPFTSLGFGLGENWFEREIQKAILQIRINGLGSEKRTAIFPKLIFTLKKGVNLNPEDPNYDIKQLALECATKRMYPDILNYDKIVELTG…
96	AMQ96516.1	xpaC	5-bromo-4-chloroindolyl phosphate hydrolysis protein	0.1122	25633	6.01	Membrane	220	MIKRNWPWLLALVLLFLFVRNNSFSFVLGLLLIGVVLVLWGLFGSRRKKGKQEEIPALTDELETHYEKSGMTANEISFFRQTMNQTKNEINQLQMNMQQTAKLKAIDLRHDPVKAAKALFKELVKEPNRLHEASQFLYTHLPNLVDLTNKYNEINDHEIKNKQTYEKLEESAQIIDQLSALIAQDYQKFVAEDLDDIDVEISVAKQSLKRDNKYEPEQKD
97	AMQ98283.1	sagA	hypothetical protein AX771_13110	0.1114	55461	4.41	Extracellular	524	MKKSLISAVMVCSMTLTAVASPIAAAADDFDSQIQQQDQKIADLKNQQADAQSQIDALESQVSEINTQAQDLLAKQDTLRQESAQLVKDIADLQERIEKREDTIQKQAREAQVSNTSSNYIDAVLNADSLADAIGRVQAMTTMVKANNDLMEQQKQDKKAVEDKKAENDAKLKELAENQAALESQKGDLLSKQADLNVLKTSLAAEQATAEDKKADLNRQKAEAEAEQARIREQQRLAEQARQQAAQEKAEKEAREQAEAEAQATQASSTAQSSATEESSATQSSMTEESSSATQSSATEESTTPESSTEESTAPESSATEESTTAPESSATEESTTVPESSATEESTTVPESSTTEESTTPAPTTPSTDQSVDTGNGTGSSTPAPTPTPTPEQPKPVT…
98	AMQ96186.1	oppF	peptide ABC transporter substrate-binding protein	0.1071	35720	9.15	Membrane	314	MTELITIKDLKVHYPIRSGFFNRVTDHVYAVDGVDFIIEKGKTYGLVGESGSGKSTTGKAVVGLEKVTAGQIMYEGKDVTKRSNRKKMGYNKDVQMIFQDSMSSLNPKKRVLDIIAEPIRNFERLSDQEEKKKVKGLLDIVGMPEDALYKYPHEFSGGQRQRLGVARAVATNPKLIVADEPVSALDLSVQAQVLNFMKRIQQEYGLSYLFISHDLGVVKHMCDNIAIMYKGRFVEIGTREDIYNDPRHIYTKRLLSAIPQIDVENRESHKENRRRVEQEYIQNQKEYYDATGRVYDLRTITTTHKVALKDGGAS
99	AMQ98577.1	HMPREF1359_00847	ATP-dependent Clp protease ATP-binding subunit (plasmid)	0.105	77792	5.15	Cytoplasmic	704	MANFYGNDPFFNNDMDDVFNQLFRRMDNQNSGRARYLVNGQSLTPDEFAQYRATGKLPQNNKTIEVSKDGKQAVKKGGILEKLGTNLTEQARDGLLDPVIGREKEIQETAEILSRRTKNNAILVGDAGVGKTAVVEGLAQAIVAGKVPETIQDKEIYSIDLSSLEAGTQYRGSFEENIKQLVEEVKAAGNIILFFDEIHQILGTGATGGEDGGKGLADIIKPALSRGELSVIGATTQDEYRNTILKNAALARRFNDVVINEPTAADTLRILQGVKELYEKHHHVVLPDDVLKAAVDYSIQYIPQRTLPDKAIDLIDMTAAHLAAKNSQTDVETLDQRLKKLEAAKEAAIKAEDFTKAADIKKSIEETKQKIKETDQKEKITVTIDDVAQSVERLTGIPV…
100	AMQ97700.1	HMPREF1359_01859	tyrosine protein kinase	0.1044	24831	9.42	Membrane	232	MARTQKQKATQTHAVSLITLTNPSSPIAEQYRTIRTNIQFASAAGQQIKTIVVTSSGPGEGKSTTAANIAVVFAKSGQRVLLVDADLRKPVVYKTFQLNNASGLSTALSSSGSVADVIQRTPVENLSILPSGPKPPNPSELLSSPRMDQVLAEARQLFDVVIFDMPPVVAVTDAQIMSSKTDGTLLVVRENTSRKESLTKAKELLEMVQARVLGVVYNGAEHSKDAGYYYGN
101	AMQ97802.1	ntpA	ATP synthase subunit A	0.1036	65378	4.68	Cytoplasmic	593	MQIGKIIKVSGPLVMAENMSDASIQDMCLVGDLGVIGEIIEMRGDVASIQVYEETSGIGPGEPVRSTGEALSVELGPGIISQMFDGIQRPLDTFMEITQSNFLGRGVQLPALDHEKKWWFEPTVEAGETVSAGDVIGIVEETKVIKHKIMVPNGIKGTIKTIEKGSFTIDETVCVIETENGDKNLTMLQKWPVRRSRPIKEKLNPDAPMITGQRVIDTFFPVTKGGAAAVPGPFGAGKTVVQHQIAKWADVDMVVYVGCGERGNEMTDVLNEFPELIDPNTGESLMERTVLIANTSNMPVAAREASIYTGITIAEYFRDMGYDVAIMADSTSRWAEALREMSGRLEEMPGDEGYPAYLGSRLAEYYERSGRVIALGSEGREGSITAISAVSPSGGDISE…
102	AMQ97671.1	dacA	D-alanyl-D-alanine carboxypeptidase	0.1029	47679	4.83	Membrane	435	MSIKKTRLVLLLASLILCLASFLPAVAVQAEDTFKVNAKAAFAVDAQSGKILYDQDGEKTMGIASITKIIGLYIVLDQVKEGKLSWDDKVSISDYAENLSVTPDLSNVPLHKENTYTVKELFDSAIIQSANASMVALAEKISGSEAKFTERMKEQLKDWGIKDATIVNASGLNNSYLGENRPEGTGENDENQMSAQDVAIVARHLILDFPEILDVSSTTTQMFGENTQSPVEMVNWNWMLPGFVNYKEGVDGLKTGTTELAGACFVGTITKNDQRIITVVLNADGHAENPSARFNETARLMDYCYDNWSEKELGKANASIPSLKTIDVKDGKESTVPVVLKSPVKVWVRNDMDTGKLTITPTLDKKQVTDNEIQAPMDKGTKIGTATITLAEDKLGYLE…
103	AMQ96846.1	fabZ	3-hydroxyacyl-[acyl-carrier-protein] dehydratase FabZ	0.1026	15305	6.75	Cytoplasmic	139	MNIQEIKEIIPHRYPMLLIDRVEEMVEGERIVAKKNVTINEPFFQGHFPEEPVMPGVLIVEAMAQAGAVALLSLEQFKGKTAYFGGLDKAKFRKKVTPGDTLYLEVEILKVKASAGIGKGIAKVDGKKVAEAELTFMIG
104	AMQ98636.1	AWT83_16000	hypothetical protein AX771_14695 (plasmid)	0.1016	23497	9.4	Cytoplasmic	197	MRVKGQNSVDKKSIFQFGKPEERSILDLFPYKSCTEEGVLVTKEDHFQRYYRVVSTDVEGLNEQEKLERMNQLTTVMRTYVPTIKLVSLTTETDLTEQIVQKRQLLDKNRMEQSLGRNLQRLRKYEKKLVEEIQELKRAEQERPDLSFFFIIEGRTIKDLQTRNRQLMRSSGILGLKPLYKKELIKILYRMNNMNDE
105	AMQ97768.1	atpH	ATP synthase F0F1 subunit delta	0.0965	20804	5.19	Cytoplasmic	180	MKLDKYTVGRRYGKALFELAIDSNKAEEIYQDLVSLRQIYEQVPGLGNMLSDVRLEPHEKREIMDKLVSGYDGIVKNFLEVVYAYNRMDDLLFMIEEYERRYDEHQGLLLGSVTTAVPLSDEQRIQLEKNVAKTMNYQSVELKQIVDSSIIGGAIVEANHRVIDGSIRTQLENMRNQLNR
106	AMQ97767.1	atpA	ATP synthase subunit alpha	0.0941	56420	5.01	Cytoplasmic	518	MAIKAEEISALIKEQIENYQNVLSVEEIGTVTYVGDGIARAHGLENAMSGELLEFSNGSYGMAQNLESNDVGIIILGDFESIREGDKVKRTGKIMEVPVGEALIGRVVNPLGQPIDGLGEIVTDKARPVEAMAPGVMQRKSVNEPMQTGLKAIDALVPIGRGQRELVIGDRKTGKTSIAIDTIINQKGQDMICIYVAIGQKDSTVRTQVETLKKYGAMDYTIVVNAGASQPAPLLYIAPYAGTAMGEEFMYNGKHVLIIFDDLSKQAVAYRELSLLLRRPPGREAYPGDVFYLHSRLLERAAKLSDDLGGGSMTALPFVETQAGDISAYIPTNVISITDGQIFLESDLFYAGTRPAVDAGLSVSRVGGSAQIKAMKKVAGTLRLDLASYRELEAFTQFG…
107	AMQ98535.1	HMPREF1359_02617	HNH endonuclease	0.093	19444	9.65	Extracellular	171	MDIEGYEGVYQVSSLGRVKSNRPNYVINKGYVNKEGFIMKPSDNGKGYQIIFLSGKGFRDRRYVHRLVAFHFLKEAYFEGAEVNHKNGDKSNNTVENLEWLSSDDNKKHARKNGLTNLKGPSKLTDLQALAIKRLYTNKLMSSGEIMKLFNVSRHTVLNIASGKTFSFLED
108	AMQ96530.1	AS238_09050	DNA topoisomerase III	0.0928	78840	9.59	Cytoplasmic	690	MKQLILAEKPSVAKDLSKVLGANQKHKNYYEGPKVIVTWALGHLLGLKMPEDLNKEWQSWQMDTLPMIPKKLGIKPLPKTGHQLKAIKQLAQRKDVSEAVIATDAGREGELVARWILEYVHFNKPVKRLWISSQTDKAIKTGFKQLRPAKEYDALYESALARAKADWLVGLNVTRALTVKYADNLSAGRVQTPTLALVRDQEKKIEQFRPQTYFTITLQAGKEQAKMLQKNQFALKTQEEAQKLVQLISTSKGTVTEVQEKLKTESAPLPYDLTEIQREANQRYGYSAKKTLSLVQSLYETHKIVTYPRTDSKYLTNDMKSTMKERLQAVSDFAPEVKQYLKNGAIVQQTKVFQDSKVTDHHALLPTENRARYEKLSNEERKIYQMIVSRFLGLFAQPH…
109	AMQ98284.1	mreC	rod shape-determining protein MreC	0.0928	31308	5.3	Membrane	284	MKKFNPNKNIIITLVIVIIVVTILSVTAAQRANEGKPNFFQSIVNDSVAMVDKTISAPVRWVRNGVASVHNLFSTYAENERLKEKIDSYDDVSQQNKNYEREIEALKKELELNQTLTSYEKVTANVITRSPDSWQDMLIVDKGSKDGIEANMAVMSQKGLIGRVIEVNTASSKIELLSSSNESSNHFPVRVSSANGEAFGLLKNYDEKLHALVVTQLTGDTDIKEGDVVQTSGLGGNSPANLPIGTVIKTKPDSYGLDREVYVKPYAEMYDVSVVTIVQRLAED
110	AMQ96757.1	clpP	peptidase S14	0.0919	24658	4.64	Cytoplasmic	228	MTTMKTFLAVKNEGAVPQIFIQGFIGSSWFFEGNTDKGIKNILDSLGDQEEIEVVINSNGGDVFQGIAIGNLLKSNKAKVNVVINGLAASAASIIAMAGDTIKIYNNAQLMIHRASTYGEGNVDDFRTIADQLESIDKSVKASYKTRFNGTDEALQELLEKESFMDAETALSYGLVDEIIDAENSSGTEAKKEQSVEEILNDVKEKRAEKIAAFTAALNKTFGQGDVK
111	AMQ98077.1	HMPREF1359_00600	hypothetical protein AX771_11755	0.0911	12817	4.62	Cytoplasmic	112	MDETLEEVKRSLEVDNEELDKQLTDFIKRISSQLCVRLGFLESVPAALNYIVVECTIKRFNRKGNEGMSSYGQEGESISYGKLLDDFEEDIFAYLKKQNGDTPPYRSVATFI
112	AMQ97468.1	CUS51_01200	hypothetical protein AX771_08075	0.0904	11132	9.05	Membrane	97	MINLGEWGAIAGSITAIVSLILLVIRPIVASFTKITKTLSQVSYNLELLTKDLESSKSDRLMIHEELKKHDERLDTHAEKLVEHTQQIKTLFRERRK
113	AMQ98259.1	BU184_14325	ABC transporter	0.09	66108	7.66	Membrane	594	MEKKKTLNTRALIRFWKMIKPEHKYFYGLFLCSLFGNLLVVAMPLIMGIGIDDLLSEIRKTGIGQLSFSDIKQALLFPVLLLIGCSVLSSITSFIQERTMAALSEKITLRVRKEITKKFKTLPMSFFDNHQVGDIISRTTTGLNQLSQVLLTGINQFFTSVVTIAAAGLMLFYIESKLTLLVLLLIVGSSIVTTKIANKNKQISEQNQYELGVLNNRMEEILAGNLVVKTFNQQAHAEAAIHEVNKKQYNAFKRAQFMNFAIYPAIRFINQLAFIISAVFGAMLVLSGGVTIGFLQAYLQYINQISEPISTASYVINSIQSAMAAIDRIFEILDETDEIPDLPDARLLEQPKGKIAFKNVQFGYTSDKILMNQVDFSVKPKQTVAIVGPTGAGKTTLVN…
114	AMQ96777.1	AS238_09895	hypothetical protein AX771_03970	0.0888	14639	4.76	Membrane	133	MLDIVPSNTHRSGSLINFAAIFACASVILASPVVVDASSTPKTKNDNQLVITTKNEINTISSNDGKIFDVINTVLKRKAEINIKYDEDLNLYFFVIKTTSELFSSDYDVLDTLDNVLSDYKYMGKSVVATLGE
115	AMQ96713.1	divIVA	cell division protein DivIVA	0.0888	26712	4.6	Cytoplasmic	235	MALTPLDIQNKTFPTKMRGYNQDEVDDFLDLVVRDYEELTQRNRELEKAVKHSEEKLEYFNELKDALNQSIIVAQDTADKVKTSASKESEVIVTSAQNKADELVANAEKRAHQLTTDAEEKARKILTDATEKARQLATETEDLKKKTRVFHQRISLMLESQLEQVKSPEWDEILQPFSSYVTDSHEVIKEVLAKQLDNENDTDVNSDTGVIEAPMTAFDTQAIDISIVPGENENE
116	AMQ98309.1	rny	ribonuclease Y	0.0887	57984	5.35	Cytoplasmic	518	MVFNILLAIIGLIVGLGLGFMVAKSRHEKEIAGAQSSAAGIIDSAKKEAETLKKEALLEAKEENQKYRSEVESELRESKLELKSQENRLIQREQTLNRKDDSLEKRENSLESKEEALSSKQQLIEEREKDVEKMIEDQQKELEKIAGLSKEDARDVIMKSTEEELNHELTLMVKESEQRAKEEADRKAKNLLSLAIQRCAADQVSETTVSVVTLPNDEMKGRIIGREGRNIRTLETLTGIDLIIDDTPEAVVLSGFDPIRREIARMTLEKLIQDGRIHPARIEEMVEKSRKEMDERIREYGEEAAFEVGAHTLHPDLIKIIGRLRFRTSYGQNVLKHSVEVAKLAGILAAELGEDIQLAKRAGLLHDIGKALDHEIEGSHVEIGAELAAKYKENPVVIN…
117	AMQ96298.1	rpmI	50S ribosomal protein L35	0.088	7809	12.66	Cytoplasmic	66	MPKQKTHRGSAKRFKRTGKGGLKRFRAFTSHRFHGKTKKQRRQLRKASMVSSGDFKRIRQQLAKMK
118	AMQ97515.1	CUS02_09675	hypothetical protein AX771_08380	0.0879	13028	6.27	Extracellular	115	MNDFHEAVLTFDVPAGMGQVYKKAIEDDNSRHWIKNEIKDGDGNIVISNIKPVWNGNYCNVDITDGVRGHSKLTITLLSRTLPNLQEQVDWYKRMGAKVISTNYKGENQNGNEKN
119	AMQ98664.1	BU186_14090	sugar ABC transporter substrate-binding protein (plasmid)	0.0876	47826	4.38	Membrane	437	MKKRMLAIAAILALTAGGLAGCGSKEKSSGSSDPGEIKIWVQFSDETPEGKAWAEIVNNFNDEYEGEYKAVTEYIPRSGSGGGYEDKVNAAITTNTLPDVITLDGPNTAAYAHSGVIAPLDDYLKDADMDDVLDSIIQQGTYDGKMYAFGFSESSVGVYYNKSLFKDAGITEDQLPTLEDPWTWTEFQAICQKLTDKYKTPAIDMQMASGDEMLTYAYTPFIWSNGGDVVNADGTKAEDYFNGKKSVEALEFIQELVEKGYTTISPIEKGFETGKYAMMLSGSWTMADLEENYQEIDYGILPYPVSDATGELVSPTGSWQLAMTEKTEKKDASAAFIKFATSTESSRIMSLGNSVLPIRNSTVDLIKDEVSEGMQVLIKQNQLSGHARPVVVAYPQVSR…
120	AMQ96184.1	plsX	phosphate acyltransferase	0.0871	35744	6.15	Cytoplasmic	333	MKIAVDAMGGDHAPQAIVEGVALAQQDFPEVEFLLYGKEAEIKKYLTNEKNITIIHTDEKINSDDEPVKAIRRKKTASMVLAAQAVKNGEADAVFSAGNTGALLAAGLFIVGRIKNIERPGLMSTLPVVGKEGAGFDMLDLGANAENKPEHLLQYGILGSFYARKVRGIGRPRVALLNNGTEATKGSEVTKKAYELLQNETSLNFIGNVEARELLNGVADVVVTDGFTGNAVLKSIEGTAMNMMNLLKSAILNEGIKGKMGAMLLKDGLRSLKAEMDYSKHGGAVLFGLKAPVIKTHGATGPDAVRYTIRQIHTMLETDVVGQLVEQFEKSEE
121	AMQ97230.1	AS238_03490	lysis protein	0.0869	23480	4.4	Extracellular	215	MKKTVIYTSLFAALFLAACQSNTNQGTSGNTSSSSEQRSSQVSDSSTKASTSSSSQTKSSSEASTQSDIKVSAARAIELFQDKYPDTAITSLELDSDWGSYFYKIEGVDDQKEYEARIDAQNEKMETENPETLDRDEQNGQKKKEDGLDVDKLITIEEAAKIAVDKVGSGTATDWDLDKDLGTTYWEVKVKDGNQSTSVKINSQTGEVLSTEQDD
122	AMQ97982.1	msmK	sugar ABC transporter ATP-binding protein	0.0861	41154	6.23	Cytoplasmic	369	MVEMALKNVYKKYDNAENYSVTDFNLSIKDREFIVFVGPSGCGKSTTLRMIAGLEDISEGELNIGGKVMNDVAPKDRDIAMVFQNYALYPHMTVFDNMAFGLKLRKYDKADIKKRVDNAAEILGLTEYLKRKPAALSGGQRQRVALGRAIVRDAKVFLMDEPLSNLDAKLRVAMRAEIAKLHQRLETTTIYVTHDQTEAMTMADRIVIMKDGFIQQIGTPKEVYDTPVNMFVAGFIGSPAMNFFNVTLKNGVITDGHGLKLRIPEGKNKVLVEKGYEGKEVIFGIRPEDIHSEQVALEASPEAVVKSEVVVSELLGAETMLYTKTGSTEFISKVDARDFHKPGEIVDLAFNISKGHFFDKETEQVIKLP
123	AMQ97748.1	ftsE	cell division ATP-binding protein FtsE	0.0844	25684	9.37	Cytoplasmic	228	MIEMKDVMKKYSNGTTAIRNLSIVIEQGEFVYVVGPSGAGKSTFIKLMYREEKASKGTLNVAGHDLIAIKNREVPYLRREIGVVFQDYKLLPRKTVYENVAYAMQVIGRKPRDIKKRVMEVLDLVGLKHKVRVFPSELSGGEQQRVSIARAIVNTPKVLIADEPTGNLDPENSWEIMKLLDRINAQGTTVVMATHNSTIVNTIRHRVIAIENGRIIRDQAEGEYGYDD
124	AMQ97878.1	rnj	ribonuclease J	0.0844	61105	5.67	Cytoplasmic	559	MKLSIKNNETGVFAIGGLGEIGKNTYGVQFQDEIILIDAGIKFPEDDLLGIDYVIPDYSYIIQNLHKVKALVITHGHEDHIGGIPYLLKQANIPIYAGPLALALITNKLDEHGLLRDAELHEINEDTIIRFRKTSVSFFRTTHSIPDALGIVVKTPSGNIVATGDFKFDFTPVGEPANLHKMARIGEEGVLCLLSDSTNAEIPTFTKSEKTIGHSILKIFSKIEGRIIFASFASNIFRLQQAADAAVATGRKIAVFGRSMENAIVNGQRLGYIKVPDGTFVDAHEINRLPANETMILCTGSQGEAMAALSRIANGTHRQIQIQPDDTVIFSSSPIPGNTTSVNHLINLLSEAGAEVIHGKINNIHTSGHGGQEEQKLMLRLMKPKYFIPVHGEFRMLKV…
125	AMQ97113.1	AS238_08425	peptidylprolyl isomerase	0.0844	27430	4.8	Membrane	253	MKKNKVILSISLAAALLFAAGCSANNTTSSSSSTESSKSTSTAESTTASSVDLNALELPQLTKDVAENEDLVEMVTNKGTIKIKLFPEHAPKAVENFMTHAKDGYYNGLTFHRVIKDFMIQGGDPKGDGTGGESIWGEGFETEINNHLYNIRGALSMARSQDPNSNGSQFFIVQNTDDMHDGLLKDDYPQAIIDAYKNGGYPSLDGHYTVFGQVIEGMDVVDAIANIETDSSDKPKEEVKIDKINILQEAKQK
126	AMQ96480.1	fhuC	manganese ABC transporter ATP-binding protein	0.0837	27537	9.5	Cytoplasmic	248	MERTAIVIQDLSAAYQGKTVLKTINLTINPQKITGIIGPNGAGKSTFMKSLLELIPATTGKVTFSGQSVNSVRKKIAYVEQRSELDLSFPIDVLGVVLLGTYPSLRIGQRPGKKEKERARQALKKVGMEEYAKRQISELSGGQLQRVFIARALAQGAEWIFLDEPFVGIDALSERKIFDILQELKNSGKTILIVHHDLHKVEEYFDEVILLNKQLIASGPVQEVFTSKNLQLAYGEIIRHLVKGGEKK
127	AMQ97138.1	ponA	penicillin-binding protein	0.0829	86528	5.03	Membrane	793	MANEQTRSSRRQKQPTPKKSVKKNSGKGSGKSSGTHKKGLFIKILLGILSFFCILFLAGVGLFWYYAKDAPELTDKKLDATVSSKLYTQDGELFEDLGAEKREKISANELPKTLEDAIVSVEDRRFYKHIGVDPIRIIGSALSNFTSGGLQGGSTLTQQLIKLSFFSTSAEDQTLKRKAQEAWMAVRLEQKKSKQEILTYYVNKVYMSNGLYGMETASEMYFGKKLSELSLPQTALLAGMPQAPSAYDPYVYPDQAKKRRDTVLYTMLQNEKISQTEYDQAVNVPVTDGLQELTQSDDNTKIVDNYVKEVINEVQEKTDKNVYTDGLEIYTNLDLDAQKKLYDIVNTDQYVSYPDDEMQVASTLIDTNTGKVKAQIGGRHIAEDVTLGNNLAVNTSRDF…
128	AMQ96406.1	AWT83_06205	hypothetical protein AX771_01760	0.0821	49315	5.32	Membrane	433	MEKKQKIILGATSALTIVILILSLFFVIRSSTKKEPIIPEKKITEKAKEPTDDKQQLVTQAKNLAQSYDYDQAIALLEKDSKNGSTETQQLLQTLKKEKEQLIDWSDPTQISHVFFHSLIVDPQKAFHSQQAQGYKDYMVTVEEFNRSIEQLYQNDFVLVNLNDLIQKDEQGNLSFNGLALPEGKKPLVLSQDDVSYYEYMDNSGFPSRLVVSNNNEIKNVYKEKDKEEIGDFDMVPLIDAFVKKHPDFSYRGAKGTLALTGYNGVLGYRTSKSQYGDNEKTKKEIKEAKKVAEQLKKDGWSFASHTWGHLNMTQASLEDVKKDNELWQQEVAPILGKTNILIYPFGADISDWQPYSAENQKFAYLKSQGFDIFCNVDASTPAWGQLGTDFYRNARINI…
129	AMQ98100.1	CUS93_13650	replication protein	0.082	33208	8.94	Cytoplasmic	283	MADNKRYYYLKLKENFFDSDEMVLLESMPDGYIYSNILLKLYLRSLKHEGKLMFNDRIPFNSTMLATITRHSVGVVEKAVQIFRDLQLIEVLDNGAIYMSDIQSFIGKSSTEADRKRKYRKEIEEAKQNLITSGQMSDKCPDKTTPELEIELEKDIELEKDIENVTPPKKSKAKPIRHKYGEYKNVLLSDEQMEKLKTEFPNDYQERIERLSEYCESSGKTYKNYLATIRSWARKEKSEPKNASGAYKRTGRREKLPEWAIDQEAYQKKKALERANRQSKAPF
130	AMQ96821.1	lytR	LytR family transcriptional regulator	0.0816	45793	4.56	Cytoplasmic	408	MKRWQKVLLTLLGVFVLLIAGLSAYGIRFMGEASQTVNKISKNSNRISSKRSERVSIDDKEPFSVLLLGLDTGGLGRTEQGRSDTMMVVTVNPKQKKSTIISLDRDIYTNIVGYGTVDKLNHAYAFGGVEMAMDSIEQLLDIPIDHYVTINLDGMEDLINAVGGIKVNNKIDFTLDGVHVPVGEQTLNGEKGLAYSRMRHEDPEGDIGRQRRQREVVTKIVNKVLSLDGVSNYRKILKAVENNVTTDLDWDDMLDVATNYTPAFETIKQDQLQGEGQMINDIYYQILGKNDLLSIQNELKKQLNIKTSDTLPNLKNENASMMFFDDSEDGDSTNGDGSNSEGYTDYSSYSENTYDQYQDPNTYYQQTEDTSQYYTPSQDTQSYDPYAGQEQNGYGYDQN…
131	AMQ97701.1	CUS02_07835	tyrosine protein kinase	0.0796	28234	7.85	Membrane	259	MEETISLKEIFETLRKHLVTIIISMFAGLAISGIVTFFILTPKYSSQAQLIVTLPQSDTANVNDVNTNLQMINTYKDMIVSDLVLNEVKDRLETEDNVKMTAGQIKDAISVNQSQNSQMFSIQAISTNAVTAQQIANTTSQVFQENAKDVMNVDKISIISGAVANTTPVSPNNKLNLVIGLVLGMMVGVGLAFLFELLDRTVKDEKYVTDTLGFPILGTVPEMSAKELNAGIRKKGTAPARPKATNDKTAPSRRSRSRV
132	AMQ96313.1	AS238_02045	serine protease	0.0786	44845	4.81	Membrane	429	MDRKNVTPKMKKSKNNSLWRKLGLGLVGGIVGGLLTAGIFYAAMGTGNNSSTATSGNQNSAGETVVENVKVNVDSDITKAVDKVQDAVVSVINLQSQNQSSGFGGLFGQQEESSSSDDSNLEAYSEGSGVIYKKDGNTAYVVTNNHVVDGQQGLEVLMKDGTKVKAELVGTDAYSDLAVLKINSDKVETVASFGDSSALKVGEPAIAIGSPLGSEYANSVTSGIISSLNRQVTSTNESNETVNINAIQTDAAINPGNSGGPLVNIEGQVIGINSSKIASTSESTSNVSVEGMGFAIPSNDVVNIINQLEKDGKVTRPALGITMVDLSAVSTQQQEQILKIPSSVTNGVIVTNVQTATPAEKAGLKQYDVITKIDDKEVSSGVELQSALYKKKVGDSVKI…
133	AMQ97932.1	ezrA	septation ring formation regulator EzrA	0.0764	67711	4.76	Membrane	573	MGNNVIIGIVIAIIIVAIVVFLVSYLMKKKNQDRLDALEKRKEELFDLPVIEEVDDVKKMHLVGQSQNTFREWSQKWNDISTSSFAELESQIFEVENLNESFRFLKGKKAVVEAEATMDQMEKQVTEIREGLKELRETEERNSLAVQQALDVYEELKEKVREDEHEYGPALFELQKQIKVIEKEFTQFVTLNTSGDPVEAREVLDKAEKHTYEVEALMKKIPPLYEELHTTFPEQLEEISDTYEKLMEEQYVFPEEDLAEDIAKVSRRIENSLANLEKTEVETVEFENRETADLIDSLYDILEREMEAQRYVKTNQSTIAEYIKHTTKNNRQLLIELDHTSQSYTLNHNEIGRVRGFQTEVEEMERQNEQMIPQIRQHEIPYSEVRTFYKTVFKVLEDI…
134	AMQ97722.1	yneF	hypothetical protein AX771_09645	0.0751	8402	10.07	Membrane	74	MLSTGIVVLIAIIALLIGAVGGFFLARKYMKDYLEKNPPVNEDMLRSMMMSMGQKPSEKKIRQMMQQMKNQGKK
135	AMQ96277.1	yajC	preprotein translocase subunit YajC	0.0744	14091	4.49	Membrane	126	MGTLPMLVMFIALLAMWFFMSRSQKKQQQERQNLLDSMKPGDSVVTIGGLHGVVSEIDNDKRTVVLDCEGIFLEYDRAAIKTVKPGTVVTNDATTTVETTEEPAETVEVKTETTETLEETEEKEEK
136	AMQ96805.1	mltG	aminodeoxychorismate lyase	0.0743	44200	5.28	Membrane	391	MSGNKQHPSKDKKEASKAATADIIDKRRNLRKKEDKIVRKIILVIALTLLIIGGFLGFTVYRYVDSGLKPLDKSDDQLVQVEIPSGSSNKQIGEILEKDNIIKSGIVFNYYTKFKNLTGFQAGYYQLAPNMTLDEIGKQLQEGGTSEPTKVADGKIAIPEGYDIDQIAERVAKVTGKDKKEFLDLVNDETFFNELYQKFPELLESASKAENTKYRLEGYLFPATYDYYTSTSLKNLVIEMVNKTNTVMQNYYSAIKQKNLTVQEVLTLASLVEKEGVKENDRKNIAQVFFNRIKANMPLQSDISVLYALGEHKELVTYEDTAVDSPYNLYTNTGYGPGPFDNPSEEAIKAVLEPAENDYYYFVADTSTGNVYFAKTYEEHMELVQKYVNNS
137	AMQ96154.1	rplV	50S ribosomal protein L22	0.072	12443	10.22	Cytoplasmic	115	MAEQITSAKATAKTVRTSPRKARLVIDLIRGKSVADAISILKFTPNKSAGIIEKVLMSAVANAENNFDLDVENLVVSEAFVNEGPTMKRFRPRAKGSASPINKRTSHITVVVSEK
138	AMQ96756.1	B4W81_00050	portal protein	0.0717	44902	4.96	Cytoplasmic	392	MGIFQKAVGYFTKKATVPLEEYFCKLQVDFVYRKFAIETCIDLIANAMSKAEFKSYEDGKNKKNDLYYRLNVAPNKKNNATEFRKKLIRRLIFYNEVLIVSPSNNSSEIFIADSWDVTEYALKDDVFSQVQINNIVLDREFLESDVIYIKYADQQIRQLVDAYYQAYGKLISSAMNVYKRSNARRYVLKGNLFRPQDNTTQDQINKMMTSQFKAFMEADNAGAVFQLQNEYTLEDFSGNFQSNSRDIKNLIDDIFEMTAAAFHVPKNLLKGDMSGLSDQVDAFLMFEIIPIAELIQDAFNASLYEVEEYLSGNFVRVDTTMIKITSFKDLVDAIDVGIRNGVFTINEGRERVGNDRSDKAMADEIFITKNNQQVSKGGEANDDNENISSSKE
139	AMQ97432.1	pyrH	UMP kinase	0.0709	25941	5.66	Cytoplasmic	240	MVTPKYQRVVLKLSGEALAGDAGFGIKPPVIKEIIQEIKEVHELGVEMAIVVGGGNIWRGQIGAQMGMERAQADYMGMLATVMNALALQDTLENVGVPTRVQTSIEMRQIAEPYIRRKAERHLEKGRIVIFAGGTGNPYFSTDTTAALRAAEIGADVILMAKNNVDGVYSADPKVDANAVKFEELTHLEVIAKGLQVMDSTASSLSMDNDIPLLVFNLNEHGNIRRAILGENIGTTVRGK
140	AMQ97376.1	engB	GTP-binding protein	0.0706	22146	9.34	Cytoplasmic	195	MKVHQAEIIISAVAPKQYPDTQLPEIALAGRSNVGKSSFINTLIDRKNLARTSGKPGKTQTLNFYLIENALHFVDVPGYGYAKVSKTERAKWGKMIETYLTTRDQLRAVVSLVDLRHKPSQEDIQMYQFLKYYDIPVIVVATKADKIPRGKWNKHESEIKKALDFDRNDTFILFSSVTKQGKEEAWAAIEQAIES
141	AMQ98107.1	BU190_10540	phage antirepressor	0.07	28079	6.45	Cytoplasmic	248	MNTPQIFNFEQNEVRTFLENDIPYFVANDVAKTLGYKNPSDATNKHCKKAVKTWGSDSLGRRQSFKVIPESDVYRLIIKSNLPSAEKFEAWVMEEVLPTIRKTGSYSNVPQSFAQALRLAADLEEKNQLLEQQIAEYEPKISYLDTILSSTDTVATSQIAADYGMSAIALNKLLNELGVQHKVSGQWILYRKHMNQGYTKSHTSEIPKADGGTKVVMNTKWTQKGRVFIYNLLIAEGYYPQMDLEEIG
142	AMQ97261.1	gls20	stress response regulator Gls24	0.0695	20478	4.7	Cytoplasmic	185	MENKNMNTTNGSVLANEKGENRMMNGELTYEDKVIQKIIGYALKDVDGLLTLDGGFFSNMAEKLVNTDNVTAGINTEVGKKQVAVDLDVIVEYGKDIEDIYNQIKELISTEVNNMTHLDVIEVNVNVADIKTQEEYQKDQETVQDKVTEAAKSTGQFASRQTDKAKSAVGKGAQKVKENNEPRVQ
143	AMQ97741.1	pstB	phosphate ABC transporter ATP-binding protein	0.069	28356	6.14	Cytoplasmic	252	MTKEIISSKDLHLYYGKKEALKGIDLSFNQGEITAMIGPSGCGKSTYLRSLNRMNDLIPNVTITGSVLYKDKDIYGPKTDVVELRKEIGMVFQQPNPFPFSIYENVIYGLKLKGEKDKKVLDQVVEESLKAASVWDDVKDKLHKSALSLSGGQQQRVCIARVLAVNPEIILLDEPTSALDPVSTGKIESMLLELRERYTMIIVTHNMSQASRISDKTAFFLDGHLIEYNDTKKIFMNPEKQETEDYISGRFG
144	AMQ98316.1	mscL	mechanosensitive ion channel protein MscL	0.0687	16681	4.56	Membrane	153	MIKEFKEFIMRGDVLDLAVGVVIGSAFTSIVNQVVQGLITPLIGWFVAMITGTSDLEGALSILDWSPTKGVTFAFGNVISAIITFLITGFVLFLVVKAANRAKNLRSKEEQVEVEETPTAEDYLSDIRDLLAKQVAEDNTHPVEQTNLSDTSK
145	AMQ96223.1	ruvA	Holliday junction ATP-dependent DNA helicase RuvA	0.0685	22479	5.69	Cytoplasmic	200	MYEYLTGVVTFINPYYIVVETNGIGYQIALGNPYRYSSKLNQKIKIYVHQVIREDAHLLYGFDSLEEKQLFLRLVSVSGIGPKSALAIMASEDHSGLIQAVESSDVTYLTKFPGVGKKTAQQMILDLKGKFGELSIDTPFSLFDEANTKDATALSEAMEALSALGYSDREIKRVEKQLKEVDNQTTDEYLRQALKLMMKK
146	AMQ96539.1	metN	methionine ABC transporter ATP-binding protein	0.0684	38158	7.68	Cytoplasmic	344	MSLIQLTNVKKTFNGKNGNIQAVNDVSLNVEKGDIYGIVGYSGAGKSTLVRLLNGLELPTSGEVIVNDQDITKLKNKELRTFRKKIGMIFQHFNLLWSRTVLENIQLPLELAGVPKSKRKERAEELLRLVGLEGRGQAYPSQLSGGQKQRVGIARALANDPEILLCDEATSALDPQTTEEVLDLLLAINKKLNLTIVLITHEMNVIRKICNKVAVMELGKVVEEGDVLTVFRQPKKEVTKRFVQQDIEPEADSTELLAELIKENPSGRLATLTFSERNANEPVISQAIRRYNIDVNVVYGKIKQVKEGSFGSLTVLMTGETKELDQAEVFIKEQGVGIEVIHRG
147	AMQ98483.1	AWT83_15000	ammonia monooxygenase	0.0663	30812	9.3	Cytoplasmic	267	MLLSLYDKEKPEYLKEALTSIFEQTVMPKEIVLVYDGPINEKLQVVVTYFQQKDPHLFTVVKLEKNQGLGIALAIGLEHTKNRLVARMDTDDIMEPQRLEKQLEIFQKDPEIAIVGSNIEEFTGTLSNVIGKRIVPEYNNAIRVFSKRRNPFNHMTVMFDKKAILEVGNYQPLSGFEDYYLWARLLKAGYKGYNIQETLVYARTGKDMYARRGGMKYLGSGLMGRYRIWKDGLGSVKDFIIVSCGHIFISLLPNQLRGKFYQTQLRK
148	AMQ97729.1	HMPREF1359_00280	general stress protein	0.0653	21116	4.68	Cytoplasmic	200	MAKKGGFLLGAVVGGTAAAIAALLLAPKSGKELRDELAAQADDLMDMASDYTDMAKEKSTELTGIAKEKAQDLSQQAGDLAGSVKQKVSESADEAGSESDDILLNLKEQSADLSNRFKKTAEDMKKPADELGSIAKDTSEDIMIDVKDAAGKAGHTVNEGMSEAKPVADDTKEMMKMAKEDAKEAKKEIKDTMTDSSTNH
149	AMQ98821.1	vanA	D-alanine--D-alanine ligase (plasmid)	0.0642	37391	5.79	Cytoplasmic	343	MNRIKVAILFGGCSEEHDVSVKSAIEIAANINKEKYEPLYIGITKSGVWKMCEKPCAEWENDNCYSAVLSPDKKMHGLLVKKNHEYEINHVDVAFSALHGKSGEDGSIQGLFELSGIPFVGCDIQSSAICMDKSLTYIVAKNAGIATPAFWVINKDDRPVAATFTYPVFVKPARSGSSFGVKKVNSADELDYAIESARQYDSKILIEQAVSGCEVGCAVLGNSAALAVGEVDQIRLQYGIFRIHQEVEPEKGSENAVITVPADLSAEERGRIQETAKKIYKALGCRGLARVDMFLQDNGRIVLNEVNTLPGFTSYSRYPRMMAAAGIALPELIDRLIVLALKG
150	AMQ98512.1	AS238_12800	portal protein	0.0621	44192	5.39	Cytoplasmic	395	MEKRGYIEDIFGHYTRYGQRYVTDSSIMESSDVYELVQDISNQVALATPIVIGPDGNEVKDHHLLKILKSPNDYLTGFEFTKLETNTLLINGETFPLTDRDQLHLAYGVTTKINERLQEEFEMNGQKIPGQMIRHIKNIGTDSLKGAGIIDLARNTLEGVLSAEKVLTDKYTKGGLLAFMLKLDAHINPNNSAQTKIVKAILDQLEGTQNESDHSVKMIPLGKGYSIETLKSPVDDAAILNYLGVYKKDLGKFLGINVDTYQSLMKTDIEKAMMYLHNKAIKPILKNKSEHYTALFFMPNSGYRVEWKINILDFVPYSTKTNIGYNIVRTGITSPDNVAEMLGFPKQNTPETQAIYISNDLSRIGQKNATDDSLPTNDQDLKGGEGNEEEGNSHD
151	AMQ97926.1	AWT83_00140	preprotein translocase subunit TatB	0.0608	52906	9.33	Cytoplasmic	450	MKRVALYMRVSTEQQAKHGDSLREQKETLYEYIEQHKDLKVVNEYVDGGISGQKINRDEFQKLLQDVKENKIDLILFTKLDRWFRNLRHYLNTQEILEKHNVSWNAVSQQYYDTTTAYGRTFIAQVMSFAELEAQIDSERIKAVMANKIAQGEVVSGKTPLGYSIENKKLVINDDAPIVIDIFNYFLSSGSLRKTVYYLGSQYGIVRDYQSVKNMLTNKKYIGELRNNKNYCPPIIDKKLFYAVQKALPKNLKTNAKRDYIFKGLLKCSDCQGSVAGQTIKARYKKKDGTESIYERTCYRCVKRRNNKLRCTNKRAFYEKNLERYIFEATKQKFEQIQINYSKKQPKIIKKKNSKKNIENKLDRLKKAYLNEVIDLEEYKKDREALMKELNEIEVEPAK…
152	AMQ97726.1	AS238_07635	transglycosylase	0.0605	86366	5.54	Membrane	781	MPRKNTRKKQNRRKKEKWFVPKIIFRVFQSLTVFITVLLLMFAALGIGIGAGYFAYLVEDTQLPTKKALQTELGNITETSKIVYADNTEISKIQTDLMRTTISFDKISPLLKTAIISTEDEYFDKHQGYVPKAVLRALVSEATGIGSSGGSTLTQQLVKQQILTDETTFKRKANEIILSAQVEKYFSKDEIIATYLNVSPFGRNNKGQNIAGVQEAARGIFGVDAKDVTLPQAAYIAGLPQSPITYSPYTNTGALKEDLSAGLARKDFVLFSMYREGQITKEQYEEAKAYDLTKDFLPQQIAEQTDREFLYYTVMNEATRIIAQQLAEKDNADMSDSSVSDAYYQKAQQTIQNKGYTIHSTIDKDVYAALQNGVENYGYMLDDGAGSQVETGNVLMDNR…
153	AMQ96332.1	truA	tRNA pseudouridine synthase A	0.0595	28391	6.41	Cytoplasmic	246	MRNIKLTIEYDGKRYSGWQRLGDDDKTIQGKIEKVLHQMTNEEIEIIGSGRTDAGTHARGQVANFKTNTEIGLAEMIDFMNRYLPRDIVIKRIEEMPERFHSRYNAVGKKYSYYVWNNVIPSAFERNHSFYFPQELDMDKLNAACEKLVGTHDFIGFSALKKSKKSTVRTIDELSIERKGEMLHFTFVGDGFLYKMVRIIMGTLLEIGTGAMPIETIDEIFESKVRQHAGETVPAQGLFLDEVYYR
154	AMQ98102.1	HMPREF1359_02615	topoisomerase	0.0595	28405	5.52	Cytoplasmic	244	MSEGTKRNDNKLFNSLYKITVNDVVEKRNKLTYLSWAWAWAEVSKICEEVDYEIYRDPETHRPYLFDEKTGYMVFTSITVNGVKRDMWLPVMDGANKAMKDKPYTYEVNDYQWNNETKKKEIVGKIEKRVEAATMFDINKTIMRCLVKNLAMFGLGLYIFAGEDMPEDVSMLEPATQRSKKLFLDALQLVANKYDKSIDEAIVALTDAASITADDSKWTKRDLGILKRGVNWLEDQYREETKEK
155	AMQ96568.1	B4W81_01250	sortase	0.0591	26375	4.94	Membrane	237	MKKKGKAKRWLVNILLFLLLLVGLALIFNEQIKDYFVRETGDKYAIANVTKEDLKKNNDKDVSFDFDAVEPMTTEGVMRSQMRGTDLPVIASIAVPSVSINLPVFKGLDNTSLLYGAGTLSPDQEMGKGNYALASHRATNPELLFTPLENLEMGAKIYLTDLENVYTYKTFFKEKVAPTDTQLLNEVEGKEIVTLITCGDMDAVTRLVVQGELESVTSIKDATDDMRSAFNLETKTF
156	AMQ97105.1	artQ	glutamine ABC transporter permease	0.0586	24411	9.04	Membrane	218	MDFSGAFSWMNIRFLLEGLKVTVEVSLFSIIFSFLIGGLTGVIRFANIPFFSKILGVVIDIIRNLPLLLIIFFTYFALPQIGIQMNIFWSAVAALTIFESAMLSEIFRAGLNAVPKGQMEAGLSTGLTYVESMRTIVLPQAFKSMIPAIVSQLISLIKDTSLAVIISLPELSHQARIIYGQNTNYVLPMFIIMTLMYFVVCYALSLLSGYLEKRRYSY
157	AMQ97121.1	fabG	short-chain dehydrogenase	0.0578	28828	6.77	Cytoplasmic	262	MNLEDKVVLVTGSSGGLGAQICYEAAKQGAIVISCARRMAFVEGVRDECRRLSGKEAYAFKVDVSNPESVDELYEKVMEEVGRVDILVNNAGFGIFEDFLTFDLGKAYDMFEVNILGMMVLTQKFAIDMAERRQGHIINIASMAGKMATAKSTVYSATKFAVLGFSNALRLELKPLGVAVTTVNPGPIETNFFDKADPSGSYLEKVGQIVLEPAKLAKMIVRNMRHPKREINQPFILEVASKFYTLFPTIGDYLASGIFNKK
158	AMQ96458.1	cysM	cysteine synthase	0.0576	33149	6.41	Membrane	305	MIISTITEAIGSTPLYRFDNQHYSMPKGSAIYAKLEYLNPGGSIKDRLGSYLIKEGFAQGKINEKTTIIEPTAGNTGIGIALAALTYKLRTVFVVPEKFSLEKQQLMKALGAKIIHSPSEQGIIGAISKSKKLAEEISNSYLPLQFENKDNPAAYYHTLGPEIFHEIKENIHSFVAGIGSGGTFAGTSTFLKEKYPDIRIIGVEPEGSVLNGGDPAPHEIEGIGVEFIPPFLSPLSINQIETISDVEGFNYTRQLAREQGLLVGSSSGAAFAAALREIRRLPPGHRVVTIFPDAADRYLSKNIYL
159	AMQ98020.1	murE	UDP-N-acetylmuramyl peptide synthase	0.0575	50231	5.86	Cytoplasmic	450	MGIRSHFAIAVGKTSQWALKTFFKGGSSLPGKLALKVDPHILDSLAKDYQVVVVTGTNGKTLTTALTVNILRQQFDEVLTNPTGANMVQGIVSTFLQAKPKKGQKKFAVLEIDEASLSKVTEYMKPELFLFTNIFRDQMDRYGEIYTTYKMIVDGAAKSPNATIISNGDSPIFNSIETVNPRKYYGFDHEEDREQMAHYNTDGVLCPNCHHILHYKMITYANLGKYYCPNCDFKRPELDYRLTDMVRMDNVSADFVIDGHEYGIEVGGMYNVYNALAATAVAEYFNVDPDKIKQGLGYDEKVFGRQEVININGKKCTLVLVKNPVGINQVIDMIGLAPYPFSLVALLNANYADGIDVSWIWDGNFENFADMDIPAVISGGDRHTDMTLRLKVAGIPENK…
160	AMQ98073.1	CUS93_13140	hypothetical protein AX771_11730	0.0568	14071	4.99	Cytoplasmic	122	MKLKIKGKEYSFKFGTKFVRELDKVMPFIDGNMEFGMGLSAKVLPELRSYNVNTLSRVLEIANRTEEETITLDEMDDYIDEVKDIEKLFDEVLKELAESNAGKLAVRNLNQKLKEAEKQQAE
161	AMQ97384.1	glmS	glutamine--fructose-6-phosphate aminotransferase	0.0565	65795	5.07	Cytoplasmic	601	MCGIVGMIGLKNVTPGLIDGLEKLEYRGYDSAGIFVSDGTTDYLVKAQGRIQNLKNKINIDTTGNIGIGHTRWATHGQPSEENAHPHTSQSGRFVLVHNGVIENFEELKIAYLANDHFIGETDTEIIAHLIETFAKDTTTQEAFLKALRVIKGSYAFALIDRTAPDVIYVAKNKSPLLIGLGDGFNVIASDAMAMLAHTKEFVEIEDEEMVTVTSEKVIIQNFAGDIVERSSFEAQVDASDIEKGTYPFYMLKEIDEQPIIMRRIAQKYVTEDNRVSLDQKLVDTLSDSDRIYIVACGTSYHAGLAGKQTLEKLTQIPVEVHLASEFGYNTPLLSKKPFFIFLSQSGETADSRQVLVKINRLGYPSLTITNVAGSTLSREASFTLLLHAGPEIAVASTK…
162	AMQ97805.1	ntpE	ATPase V	0.0565	22794	4.66	Cytoplasmic	194	MNAIEKIISQMNEAAEQERAALEQEERMKIDQNFEQKRTQIETEHQKQKEKQIELLEKKYRQLRNRQQVEVRQENLNAKQEFLRRLFADAIAEMENWDESEQIQFIKNSLYSLPLTGKVTFIAGEKSAAYLSQTLLDEWNNELPFMMVLSDETVADQAGFLINDQGVQYNFLFSSLVQDIQGTMSFEIANQLFE
163	AMQ98129.1	AWT83_01495	glycine betaine/L-proline ABC transporter ATP-binding protein	0.0559	44485	5.14	Cytoplasmic	397	MVKVEVKHLTKIFGKKTQAALDMMNDHQPKTEILKKTGATVGVYDVNFDVKEGEIFVIMGLSGSGKSTLIRLLNRLIEPTSGSIYIDGEDVSKLSKEELREVRRHKINMVFQNFGLFPHRTILENTEYGLEVRGVPKEERQEKAEKALENSSLLSFKDQYPSQLSGGMQQRVGLARALANDPEILLMDEAFSALDPLIRREMQDELLDLQANVQKTIIFITHDLNEALRIGDRIALMKDGEIMQIGTGEEILTNPANDYVREFVEEVDRSKVLTAQNIMVPALTTNIESDGPNVALTRMRNEEVSMLMAVDRKRHLKGIITADQALEARKQKRPLIDFLDENVTVIGKDMVVSDIFNIIYDSPTPLAVVEDGKLKGVVIRGSVIEALAETSEVSEHE
164	AMQ96740.1	AS238_14015	hypothetical protein AX771_03765	0.0554	29540	9.51	Extracellular	249	MTEHRSYYAIIPANVRYDKRLKPNTKLLYGEITALCNERGFCWAGNEYFADLYGVNKETISRWVSDLIKFGYLNREIIYKEGTNQIINRYLRINQYPIDEKRNTPIDEKVKDNNTSINNTFNNTKEYIRELPPSKKSKAKPVRHKYGEYKNVLLSDEQMEKLKTEFPNDYQERIERLSEYCESSGKTYKNYLATIRSWARKEKSEPKNASSGYKRTGRREKLPEWAIDQEAYLKKKALERANRQSKAPF
165	AMQ96275.1	AS238_01820	hypothetical protein AX771_00985	0.0552	25181	8.67	Membrane	232	MQSSAELKRQAKESLKGRWGQAVLLNLIPTLIGIATILLIMIPIILFATTIYDGSASVSEATTSGGGSSGGGGGIISSIISALFMSGISWTYLDILRGQKDQIEPFKDAFRGFKGLFIGGVISLAVLISIFTTLWGLLLVIPGIIKSYSYSQSYFIYYDIVQETGQTPKVLDTITASRKLMDGYKGQLFWLDLSFIGWHILALATAGIGYLWLSPYISATKAAFYEQLPKDI
166	AMQ96790.1	rmlB	dTDP-glucose 4,6-dehydratase	0.0549	38447	5.2	Cytoplasmic	342	MKNIIVTGGAGFIGSNFVHYVVNNHPEVHVTVLDKLTYAGNKENLAGLPSDRVELVVGDVADAELVDRLVKEADAVVHYAAESHNDNSLKDPFPFVQTNIIGTYTLLEACRKYDVRYHHVSTDEVYGDLPLREDLPGHGEGEGEKFTAETPYNPSSPYSSTKAGSDLLVKAWVRSFGLRATISNCSNNYGPYQHIEKFIPRQVTSILSGIRPKLYGEGKNVRDWIHTNDHSSAVWLILTKGRIGETYLIGADGEEDNKTVMELILEMMGQPKDAYDHVNDRAGHDLRYAIDSTKLREELGWQPEFTNFRDGLADTIKWYEEHEDWWKKEKEAVEAAYAKNGQ
167	AMQ96196.1	fetB	iron ABC transporter substrate-binding protein	0.0541	34302	4.52	Membrane	317	MKKLVVGILILASFGLAACGNSNNTSQADTKKSSTQTETTLTITDSNGDQIEVPNNPEKVVVFDNGSLDTMDALGVGDKVVGAATSSLPEYLSSYKKVESAGGIKEPDLEKINQLQPDLIIISGRQRDFQKDLSQIAPTIFLSLDAKNPWESFQQNVTALGEIFGKQEEAKTQLEELSSAIDQTKKKAEATDKKALVTLVNEGQLSAYGSGSRFGFIHDLFGFEQADDQIEASTHGQSVSYEYVLEKNPDILFVVDRTKAIGGDDSKDDISANELVAQTNAGKNQQIISLEPDVWYLSGGGLESMKLMIEDVNQAFK
168	AMQ97217.1	AS238_03415	hypothetical protein AX771_06615	0.0538	14556	6.59	Membrane	130	MKKIIYSLLAMSVSILILTSCSTTYTQSASNQKEEVKTSQKATITLQENGQNFSEKEVVFKKGDDLLSILKRNFEVKEDNGFITSLEGHSQDEKNQLYWMFTVDGKSATTGAKEIKLNDGQSVIFNLSKL
169	AMQ96158.1	rpsQ	30S ribosomal protein S17	0.053	10245	9.93	Cytoplasmic	88	MTEGRNQRKVYQGRVVSDKMDKTITVAVETKKNHPIYGKRMNYSKKYKVHDENNTAKVGDIVRIMETRPLSATKRFRLLEVVEEAVII
170	AMQ98706.1	AWT83_16455	multidrug ABC transporter ATP-binding protein (plasmid)	0.0509	24059	9.3	Cytoplasmic	218	MDILEIKNVAYSYANSKEKVLSGVNQKFELGKFYAIVGKSGTGKSTLLSLLAGLDKPQTGKILFKNEDIQNKGYSNHRKNNISLVFQNYNLIDYLSPIENIRLVNKSADESILFELGLDKKQIKRNVMKLSGGQQQRVAIARALVSDAPIILADEPTGNLDSVTAGEIINILKTLAKDRNKCVIVVTHSKEVADSADIILELSGKKLKKVNKMNLEVE
171	AMQ97745.1	pstS	phosphate ABC transporter substrate-binding protein	0.0507	31018	4.77	Membrane	285	MKKLKLFLPIIGLAILLSGCSKWIDRGESITAVGSSALQPLVETVAETYQTENPGKFINVQGGGSGTGLSQVQSGAVDIGNSDLFAEEKSGIDASALVDHRVAVVGITPIVNKDIGVKDISMENLKKLFTGEIKNWSEVGGKDQPVVILNRASGSGTRSTFEKWVLDGETAVQAQEQDSSGMVRQIVADTPGAISYVAFSYVSDDVDTLNVNGVEPTDENVTTNKWTIWAYEHMYTRDHPKKLTKEFLDYILSDEVQDNIVGELGYIPVSHMKVERDWQGNIVKE
172	AMQ98210.1	AS238_07985	hypothetical protein AX771_12500	0.0506	12741	4.95	Cytoplasmic	114	MIKNFFKGLLFGAAAGTVGGLLLAPRSGNETRKKLIEELEEATTLTNDLNNSLNHFKSALIETKETAESVIPAFQEAIKKDIEDFKFQAEPRITQINEQVEKLKADLPEYPEQI
173	AMQ96869.1	pyk	pyruvate kinase	0.0496	63608	4.81	Cytoplasmic	594	MKKTKIVSTLGPASNSVEIISQLIESGANVFRFNFSHGDHEEQLSRMTMVREAVKKTGKDVGILLDTKGAEIRTTVQGTTEADFGRAGYIKFEVGDQTRISMDPEHVGSKEKIAVTYPGLFDDVHVGGHILFDDGLIDMQIIEKDEANRELVVEVKNAGMLGSRKGVNAPGVSISLPGITPKDADDIRFGLDNDIDFIAASFVRKAQDVLDIREILEEKDMTHVQIFPKIESQEGIDNIDEIIKVSDGVMIARGDMGVEIPAELVPMVQKRIIKKCNAAGIPVITATQMLESMQENPRPTRAEASDVANAVFDGTDATMLSGESANGDYPVEAVSTMARIDQEAENALSELGTFQLNEFDKTDVTETIGLSVARAAKNLGVKTIVAATESGYTAKMISK…
174	AMQ97665.1	AS238_12185	peptidase	0.0495	19835	9.52	Membrane	175	MKIKERRPLKKKQTKEKTINRVLLGLIVFLLAVIVISSIFYLRSSRPAVQAKKEAVEIAKKYANLEETDHFYWFTRKKTYFSLTGTNDKGKEIAVIIPKSGEKVKVLDQTKGLTENEAKQTIAAAHPEIQIEKAALGMYDDQPVWEVVGKETNGKLNYYLIGFESGDEVKTIKGI
175	AMQ97321.1	dagK	diacylglycerol kinase	0.0485	34096	5.79	Cytoplasmic	302	MEKLLVFYNKSSGKDEGEKLARWFQDYVKEKQPELYVELAETGPSIDDAELVKKAEAIEADTLVIIGGDGTIHHIVQAFQKTLSQYHVGLLPGGTVNNLARVLEIPLKKEEAADVILEGNVRKIDYGQVNDEVIISTLTIGILADTAVWISQEEKQRYGSWIFIKKFFKLLLKKKKYHLDLETDEEHWKGKSQLLTVTMSNSVGGFTNFDDSATLDDGKFHVTIVPSLDIFRFIFYLPRIMRGKFYTIPGITYFTAKRMKIQAQEKSVGTRTDGDTTDDLPVELSVVSKGLTVYSPKKEEKA
176	AMQ96868.1	pfkA	ATP-dependent 6-phosphofructokinase	0.0482	34191	5.34	Cytoplasmic	320	MKRIGILTSGGDAPGMNAAVRAVVRKGIYEGLEVYGINYGFAGLVAGDIRRLDVADVGDKIQRGGTFLYSARYPEFATEEGQLKGIEQLKKFGIEGLVVIGGDGSYHGAMALTKRGFPAVGIPGTIDNDIPGTDFTIGFDTAINTVLESIDRIRDTATSHVRTFVIEVMGRNAGDIALWSGVAGGADEIIIPEHDFDMASVAKKIQEGRDRGKKHCLIILAEGVMGGNEFAEKLSEFGDYHTRVSILGHVVRGGAPSARDRVLASKFGAYAVELLQEGKGGLCVGIHDNEIVASDIIDTLENNKHKPDLSLYDLNNSLSF
177	AMQ98525.1	B4W81_08985	V-type ATP synthase subunit G	0.0477	13188	6.77	Cytoplasmic	110	MKQVLEALEQIRKAEEENEKRARTLRQQLKTYAEEKEQELEIIQTNSRQQLKQLVEEKEQFEKQELEKEKMKLKAEADKVQATLKDQYQKHQSQAIGAIIERVKETYGRH
178	AMQ97871.1	A5810_000385	hypothetical protein AX771_10475	0.0475	20308	5.78	Membrane	175	MIVGITGLIGVLTGAVVVYIGMILQMRHLENKEQRRRELELKVKEIETLNQLNKKINEILQKRTTLMEEYVSFDAFDDCYITIDDFAYLQSFSAQNSFYLPNYILDELFKNISHRKVILSPDETMKIGGYAYKGGRVILENFTDSLTEMINEKKAQLKTMTRQPIGFFSKDDVWS
179	AMQ96841.1	acpP	acyl carrier protein	0.0472	8558	3.87	Cytoplasmic	74	MVFEKIQEIIAEELGKETEEIKLTTDIQEDLEADSLDLFQIINEIEDEFDVKIETEDGIKTVQDLVTYVEKQTA
180	AMQ96576.1	AS238_10150	hypothetical protein AX771_02780	0.0466	15723	4.83	Extracellular	141	MKKLIVLFILSAGLLTLTGCDLFGGSDQSSDETTDSSVLKAEKADTTNSVYTLKVRKDMDLSAGQLTFTDKKMEWTRTYQTQGTDSSESSEEKTVLTDIKITTKDDEYIISGKENKKETTVIFTKIGNYRLKDEDGNIYSL
181	AMQ97742.1	pstB	phosphate ABC transporter ATP-binding protein	0.0459	30311	6.92	Cytoplasmic	268	MKKYNWNETNVITMPKEKEVALYTDDLHVWYGDNEAIKGVDLEFEKNKITALIGPSGCGKSTYLRSLNRMNDGIANTKITGKIMYQGVDINAPQVDVYEMRKRIGMVFQRPNPFSKSIYDNITFALKQHGEKNKKKLDEIVETSLKQAALWDQVKDSLDKSALALSGGQQQRLCIARAIAMKPDILLLDEPASALDPISTGTVEETLVNLKEDYTIIIVTHNMQQAARISDYTAFFYLGKVMEYDKTNKIFTRPKIQATEDYVSGHFG
182	AMQ97401.1	AS238_11630	carboxylate--amine ligase	0.0459	49549	5.33	Cytoplasmic	421	MMNSIENEEFIPILLGSDMNVYGMARSFNEAYGKICQAYASDQLAPTRYSKIVNVEVIPGFDKDPVFIETMLRLAKERYSDKSKKYLLIACGDGYAELISQHKQELSEYFICPYIDYSLFERLINKVSFYEVCEEYDLPYPKTLIVREEMLVNGHLEQELPFEFPVALKPANSVEYLSVQFEGRKKAFILETREEFDLILGRIYEAGYKSEMIVQDFIPGDDSNMRVLNAYVDEDHQVRMMCLGHPLLEDPTPASIGNYVVIMPDYNEKIYQTIKAFLEKIEYTGFANFDMKYDPRDGEYKLFEINLRQGRSSFFVTLNGLNLARFVTEDRVFNKPFVETTYGTNQSDKARLWMGVPKKIFLEYARENEDKKLAEQMIKENRYGTTVFYEKDRSIKRWL…
183	AMQ98352.1	yadG	ABC transporter	0.0453	35396	5.69	Cytoplasmic	311	MANALEINNLKKIYGSGVEALRGIDLSVKEGDFYALLGPNGAGKSTTIGIITSLVNKTSGKVNVFGYDLDKDLVRAKQQIGLVPQEFNFNPFETVQQIVVNQAGYYGVSRKEAMKRSEKYLKQSNLWEKRNVRARMLSGGMKRRLMIARALMHEPRLLILDEPTAGVDIELRREMWEFLRELNENGTTIILTTHYLEEAEMLCRNIGIIQSGELIENTSMKELLSKLQFETFIFDLAPYDTKPVIEGYACTFEDEQTIAVEVERNQGVNGIFDQLTRQGIKVLSMRNKSNRLEELFLKITEENNHTEEKNV
184	AMQ98420.1	rpoB	DNA-directed RNA polymerase subunit beta	0.0451	134995	4.92	Cytoplasmic	1208	MKSLAGHVVKYGKHRERRSFARISEVLELPNLIEIQTDSYQWFLDEGLREMFEDILPIDDFNGNLSLEFVDYELKEPKYTVAEARAHDANYSAPLHVTLRLTNRETGEIKAQEVFFGDFPLMTEQGTFIINGAERVIVSQLVRSPGVYFHGKVDKNGKEGFGSTVIPNRGAWLEMETDAKDISYVRIDRTRKIPLTVLVRALGFGSDDTIFEIFGDSETLRNTVEKDLHKNASDSRTEEGLKDVYERLRPGEPKTADSSRNLLNARFFDPKRYDLANVGRYKVNKKLDLKTRLLNLTLAETLVDPETGEIIVEKGTVLTHQVMETLAPFIDNGLNSVTYYPSEDGVVTDPMTVQVIKVFSPRDPEREVNVIGNGYPEAAVKTVRPADIIASMSYFLNLM…
185	AMQ97784.1	gap	glyceraldehyde-3-phosphate dehydrogenase	0.0445	35741	5.26	Cytoplasmic	333	MTVKVGINGFGRIGRLAFRRIQDVDGIEVVAINDLTDAKMLAHLLKYDTTQGRFNGTVEVHEGSFNVNGKEVKVLANRNPEELPWGELGVDIVLECTGFFTSKSAAEKHLTAGAKRVVISAPGGNDVPTIVYNTNHETLTGKETVISGASCTTNCLAPMAKTLNDKFGVVEGLMTTIHAYTGDQMTLDGPHPKGDFRRARAAAANIVPNSTGAAKAIGLVIPELNGKLDGAAQRVPVPTGSLTELVTVLEKEVTVDEINAAMKEASNESYGYNTDEIVSSDIVGMTYGSLFDATQTKVMTVGDKQLVKTVAWYDNEMSYTAQLVRTLEYFANL
186	AMQ96560.1	prsA	peptidylprolyl isomerase	0.0443	33391	5.19	Membrane	303	MKKRFLALAIVLGTGLLSGCTNAGEKTAVSYKGGTISEQEVMDSLKKMQGADSAVQQLIVYQVFEDKYGDDVSTKEIDSQYDQTKKQLGDSFDSQLKSAGYTEQTFKDSIKQSLAFQEGLKKHIKLTDEDLKTAWESFHPEVEAQIIQVASEDDAKDVKKAADKGDDFSKLAKDKSTDTTTKEDGGKVKFDSTTTTVPAEVKEAAFKLKDGQVSDVITSTNASTYTTEYYVVKMVKNQNKGNDMDKYKKELKEIATDTKLSDSTFQNKVIGEVLKDANVKIKDKDFENVLSTFTSDSSTASSK
187	AMQ98002.1	yecS	amino acid ABC transporter permease	0.0442	23665	9.07	Membrane	213	MEYLIEVMPQLLVGALTTLKLFLFTLIGSLPLGIVLALGLSLHFKPLRYLLQTYVWVMRGTPLLLQLIFIFYGLPTIGIVFDRFEAALIAFILNYAAYFAEIFRGGIQSIPQGQYEAAQVLQLSPFQTVTKIVIPQVTKIVLPSVGNEVINLVKDSSLIYILGLGDVMRAGKIAMERDATLLPLLGVAIIYLTLTGILTIVMKQVEGKLNYYR
188	AMQ96629.1	potA	spermidine/putrescine ABC transporter ATP-binding protein	0.0435	41142	4.85	Cytoplasmic	361	MGKPIISFDQVVKRYDDETVLKKVSFEIEQGKFYTLLGPSGCGKTTILRIIAGFTEATEGDIYFEGKRLNDLPANKRQVNTVFQDYALFPHMNVFDNVAFGLKIKKMSKSDIEKKVKDALRMVQLPGYEKREISEMSGGQRQRVAIARAIVNEPKVLLLDEPLSALDLKLRTDMQYELRDLQQRLGITFIFVTHDQEEALAMSDEIFVMNKGKIVQSGTPVDIYDEPINHFVADFVGESNIVDGVMIEDNLVEFVGKQFECVDGGMRLNEPVEVVLRPEDLTITTPDKGKLVVTVDTQLFRGVHYEIICYDEQQNEWMVHSTKKAKEGSKVGLAFEPEDIHVMRFNESEEEFDARLDSYEE
189	AMQ97149.1	cshB	DEAD/DEAH box helicase	0.0432	51309	9.6	Cytoplasmic	449	MNNFDIFRFKPFINEALTAKGFKQPTEVQERLIPLIAKGKNIIGQSQTGTGKTHTFLLPLFEKINAEKEEVQVVITAPSRELAAQIYEAATQIAKFSTPEIRVSNFVGGTDKQRQLNRLHHQQPQVVVGTPGRILDMMNEQALKIHTAFAFVVDEADMTLDMGFLNEVDQIASRLPEKLQFLVFSATIPEKLRPFLRKYMENPIIEEIKPKAVISEDIENWLISTKGKDENQMIYQLLTIGHPYLAIVFANTKQHVDEIADYLKNQGLKVAKIHGDITPRERKRVMRQVQNLEYQYVVATDLAARGIDIEGVSHVINAEIPEDLDFFIHRVGRTGRNGLKGTAITLYSPNDEQAIDAIEKLGVSFEPKEIKNGEIVKTYDRNRRAKREKSKDVLDPTLI…
190	AMQ97342.1	tcyP	sodium:dicarboxylate symporter	0.0432	48688	9.44	Membrane	463	MTTLITVLVVLVFAALLYVFYRMQKRHTKFSTRVFTALGVGIVFGGLLQLIFGVDDKVVTQSMEWIGIVGQGYVSFLQMLVMPLVFISIIGAFTKMKVSEKLGKISATVLTSLLGTTAIAALIGIGSTMLFGLQGAKFTQGAAETARISELATRQETVENLSIPQQILSFIPKNVFADLAGSRATSTIGVVIFAAFVGIAYLGVKRKAPKEAAFFSDLVDSLYKIIMRIVTLVLRLTPYGVFALMTNVLATSDFAAIVNLGKFVVASYVALLAVLIVHSLILIGAKVNPINYFKKAFPVLSFAFTSRSSAGALPLNIETQTKALGVDDATANFSASFGLSIGQNGCAGVYPAMLATIVAPAAGVNVFSLEFILMLVAIVTISSFGVAGVGGGATFASLI…
191	AMQ96674.1	dltD	D-alanyl-lipoteichoic acid biosynthesis protein DltD	0.0426	49172	9.41	Membrane	422	MKKKLFAIFGPVVLAVGLLFVFFTSSYQVDISNPETIRRASSSMSVNVLKGDAIKNYALSEKQYIPFFGSSELSRISPFHPSVLAEKYQRNYRPFLLGAPGTQSLSQYMMMRSAGDAMKNKKVVFIISPQWFVKNGVKTDYFNTYYSELQTYDWLFSMKKVTPADRYLARRLLTFSKVKENDTLTAILQTIKKGKLPLPESLNQLRSQWNMLKREDEVFSNIGLKDRQQKIDHESKRLPKQYQETELSILANQIGERETTNNPFGLKNDFYTHRIRAHEPELKQSQKNWDYRFSPEFSDFQLVLDQLAKNHNEVLFIIPPVNEKWSDYTGLSQEMLQGFAKKIKFQLNSQGFNRIADFVNQAGTNYFMEDTIHLGWKGWLAADQQIRPFLEENHITASK…
192	AMQ98082.1	HMPREF1359_00607	phage head morphogenesis protein	0.0426	36645	9.05	Cytoplasmic	317	MKSQDYFIKREKAWQEQQIKDDKKRMNEIKKRLQYAQDAIQKEIDAQWDSFSNGQKITRSEAMKRADEMDVKAFARKAKKYVKEKDFSPTANKELKLYNLTMRVNRLELLKANIGLELIATFNDMDKYFSGELTSAGLKELQRQAGILEMTIAKSGYAKLVEQVINSSFRADGFATFSERLWMYQAELKADLDKLLVRSVTMGRNPKQLAPELSKFLTEEGRENTKFNTQRLMVTETTRVQTGIQEQSYRDADIDQFVFISEPTACRYCLPLNGKVFDLKDMSPGVNCAPMHPFCRCSTAPYVDREAFEKSLKERGL
193	AMQ97769.1	atpF	ATP synthase F0F1 subunit B	0.0423	19157	4.9	Membrane	174	MLNQLAIAEVGNAMLGNVIVVSGSFLILLALLKHFAWGPISDILKKREDKIANDLDSAEQSRINSAKMEQEREQQLLASRSDAADIIKNAKESGELSRQNILKDAQEEAARLKSKAQADITVERDSALNSVKDDVAELSLQIAEKILNKELSPEMHESLINQYIEGLGSSNETR
194	AMQ97492.1	res	DNA invertase Pin	0.0421	21734	9.85	Cytoplasmic	190	MTKYGYARVSTASQSTKEQIQQLLENGVEKKNIFSEKFTGTKRDRPKFNQLLAGLKPGDEIVVTKLDRFARNTREALEIIEPLLDDNVTIKVLNLGTIENTSMGRMVTRTLLSVAEMERDMIVERTQEGKMFARKNNPNFREGRPKATITPKKRHAYELLTSGKSYKEVEAITGFSRSTLFRIKKKIEES
195	AMQ97857.1	rex	redox-sensing transcriptional repressor Rex	0.0421	24363	5.43	Cytoplasmic	218	MKDHIIPKATAKRLPLYYRYLRILNNAGKKKVSSTELSEAVQVDSATIRRDFSYFGELGKRGYGYDVEDLMHFFAKTLNDDQLTNVALIGVGNLGSALLKYKFHQSNSIRISCAFDVNEEIVGRIVDGIPVYPMEDMSEQIKIQQIEVAILTIPAERAQEVVNQLTEAGIKGILNFTAARLNAPSDVLIQNVDLTNELQTLIYFLHSDANAHSENTAE
196	AMQ98534.1	HMPREF1359_02355	phage tail protein	0.0415	29618	4.67	Extracellular	256	MYSFKDTTINLNSSKRFLPTSAMMYDGMYLEDLIEGYQTLTVEGREMLSVEVEQQEIQIGSIITNQKIPSRTLKITYKLEDRDPEKLQFKFKELLNYLYRNEDVEIRFHDELDYYYYGRYTSTDTVPGDSNSIISSFNVFCADPLKYTKECVSDGYIGNPIQFPITPRKIEVTLSMNNSIKITNGEQNITITDAAIKTGDVLVFDFSDEQVTVNGEDCTSMIDLESDFENFYLKQGQKITSNNGKLKIFYRGRQFE
197	AMQ97433.1	tsf	elongation factor Ts	0.0413	32223	4.94	Cytoplasmic	293	MADVTAKMVKELREMTGVGMMDAKKALVEVEGDMEKAVDLLREKGMAKAAKKNDRIAAEGLASVAVKGNTAAIVEVNSETDFVSKNEMFQDLVKEIAELVAENKPADMEAAMKIKTDKGTIESDLIEATQVIGEKISFRRFEVVEKDDNAAFGGYLHMGGRIAVLTVLDGTTDETVARDVAMHVAAINPRYVNESQIPEAELEHEKTVLTEQALNEGKPANIVEKMVEGRLKKFKAEIALVDQPFVKDPDMTVEKYVASKGATVKTFVRFEVGEGIEKREDNFVEEVMSQVKK
198	AMQ97103.1	peb1A	glutamine ABC transporter substrate-binding protein	0.0411	29802	5.13	Membrane	271	MRRLKKIRLIFLLGIAFLALAGCKGNGLANEDILERSKSTNEIIWGVKYDTRLFGMMDIESRTVQGFDVDIAKAITKKILGDNGKTEFVEVTSKTRIPLLKNGNIDAIIATMTITDERKKQVDFSDVYFDAGQALLVKKGSQIKSVDDLNASTTVLAVKGSTSAANIRQHAPDAKILELENYAEAFTALQSGQGDAMTTDNAILLGIADENPEYELVGGTFTNEPYGIAINKGQENFLKAVNQALEEMHADGTYDKIYQKWFPNETEGKVE
199	AMQ96708.1	ftsA	cell division protein FtsA	0.0407	47988	4.52	Membrane	441	MAKTEMYVGLDIGTTSVKVVVAEYIDSQMNIIGVGNAKSEGINRGIIVDIDKTVQAIQRAVRQAEEKAGIQIKGVSVGLPANMLEVENCQGMIAVNGDSKEITDEDVRNVASAALVRSIPPERQIVSILPQDFTVDGFEGIKDPRGMIGVRLEMYGLLFTGPKTIIHNIRKCVENAGLIVNEMVITPLALTESILSDGEKDFGTIVIDMGGGQTTTAVMHDKQLKFTNLDQEGGEFVTKDISIVLNTSFNNAEALKINYGDAYPERTSPDEEFPVDVIGQSEPVKVDERYLSEIISARMEQIFNKAKDALDQIEALELPGGVVLTGGAASLPGVVDLAQEIFGVNVKLYVPNHMGLRNPVFTNVISIVDYSANLSEVYQLAKIAVTGETSAARQMVVEQ…
200	AMQ97070.1	ylbL	peptidase	0.0402	37935	5.03	Membrane	347	MKAKQWLKTVLIIIFGMLIIGFVVVPLPYYVESPGATIDLKELITVNDKEDKGSGSFSLTSVGIRQATGFLALKAKMTPFEELISEEELTGGATNEEYNQMQQYYMDSSQNAAIEQALKLADKPYKMEFKGVYVMSVEKTSNFFGKLSVGDTVTKVDGKSFQSTEAFMDYVKSQKVGQTIEISYLHNGEEKTASGDLIELPTDKKAGIGITLTDHTEIESDTDVRINSGSIGGPSAGLMFTLEIYEQVTGKNLRHGKQIAGTGTINSEGEVGRIGGIDKKVASADKAGVEIFFAPDDTISDDVKKEYPEIKTNYEEAKAAAKKLNSSMKIVPVKTVQEALDYLEKMK
201	AMQ98302.1	purR	transcriptional regulator	0.0399	30285	5.83	Cytoplasmic	272	MKVRRSERLVDMTQYLLNHPHELISLTSFAERYESAKSSISEDLGIIKKTFKERGYGTLETIPGAAGGVLFIPEISYEEAKKYIESLAERLSEQDRLLPGGYVYLSDLLGEPELLRQVGRIIASKYLGEKIDAVMTVATKGVPIAQAVSYYLNAPFVIVRRDSKITEGSTVSVNYVSGSSERIEKMELSKRSLKRGSRVLVVDDFMKGGGTVNGMKSLIEEFESELVGITVFAESKFNGHRAIDDYTSLLYVKDVDTQTKNITVVPGNYFSE
202	AMQ96584.1	AS238_10190	haloacid dehalogenase	0.0399	25043	5.69	Cytoplasmic	223	MKGAIFDLDGLLVDTEKTYRDGWLWGFQQFDIHIPKEIVDAWGGKNWKQSFDILVKAAGSPEKVQEVRAKREEYFYQQLTSGAIHLKPYAKEILADLKERHMKLGIATTTVTKRATDILDHFKLADYLDTFTFGDEVSENKPSPIPYLTALERTGLEASSAFAVEDSLVGATAASRAGLGVVLIPDSSFVRNYTVEEKEKLKLLAEGKDLRTVIEMLNKKTEK
203	AMQ96531.1	AS238_09045	glucosyl transferase family 2	0.0399	35555	5.66	Membrane	315	MKVSIVVPCFNEEKTVPLFFDEVEKFKGAHEFEYLFIDDGSKDGTLAAIKKLASAYPYVRFVSFSRNFGKEAALYAGLQASTGDLVTVMDVDLQDPPELLPEMINRITTSDIDCVGTRRSTREGEPAIRSFFAKKFYQLINKISDTEMVDGARDFRLMTRQMVDAVLELTEYNRFSKGLFSWVGFKTEYISYENRERVAGETSWSFWKLFNYSIDGIVNFSDAPLTIASFIGALSCVGSGIAILFIILRALLFGDPTSGWPSMVSIFLFIGGIQLLCLGIIGKYIGKIFLETKQRPVYIIRETEKVKPNELKPHQ
204	AMQ97428.1	eep	metalloprotease RseP	0.0395	46119	5.02	Membrane	422	MKTILTFIIVFGILVIVHEFGHFFFAKRSGILVREFAIGMGPKIYGHQAKDGTTYTLRLLPIGGYVRMAGNGDDETEMAPGMPLSLLLNSDGIVEKINLSKKIQLTNAIPMELSRYDLEDELTITGYVNGDETEVVTYPVDHDATIIENDGTEIRIAPKDVQFQSAKLWQRMLTNFAGPMNNFILAILLFIILAFMQGGVQVTNTNRVGEIMPNGAAAEAGLKENDEVVSVDGKEIHSWNDLTTVITKNPDKTLDFKIEREGQVQSVDVTPKSVESNGEKVGQLGIKAPMNTGFMDKIIGGTRQAFSGSLEIFKALGSLFTGFSLDKLGGPVMMYQLSSEAANQGVTTVISLMALLSMNLGIVNLLPIPALDGGKLVLNIFEGIRGKPLSQEKEGILTL…
205	AMQ97766.1	atpG	F0F1 ATP synthase subunit gamma	0.0395	33130	4.98	Membrane	300	MGASLNEIKTRIASTKKTSQITRAMQMVSASKLTKSEASSQKFQVYATKVREIVTHLTATQLNDIASENPRGDINYNSMLLSRPVKKTGYIVITADGGLVGGYNSSILKQTMSILEEDHQSPDDYVMIAIGGTGADFFKARGINLAYELRNLSDQPSFDEVRKIVNMATTMYQNEVFDELYVCYNHHINSLTSQFRVEKMLPISDLDPEEATTFEQEYIFEPSKEEILSQLLPQYAESLIYGAIVDAKTAEHAAGMTAMKTATDNAANIIDELTVSYNRARQGAITQEITEIVAGASALE
206	AMQ97441.1	arcA	arginine deiminase	0.0394	46145	5.12	Cytoplasmic	409	MDKPIHVFSEIGKLKTVLLKRPGQEVENLTPDIMDRLLFDDIPYLPIAQEEHDNFAKTLQNEGVETLYLEKLAAEAIDAGNVKEQFLNKMLDESHIASNAVREGLHEFLLSMETQEMVDKIMAGVRTKDIEVRSSSLYDLSADDDYPFYMDPMPNLYFTRDPSASMGNGMTVNKMTFEARRRESMFTEYILKHHPRFANKGIEVWLDRENPDHIEGGDELILSDKVVAVGISQRTNAKALEKLARHLFAKNSGFEKVLAIKIPNNRAMMHLDTVFTMVDHDKFTIHPAIQSKDGKMDVFTIEPDGDDIKITHSDNLHETMKAALGLDDLVLIPTGNGDEIVAPREQWNDGSNTLAIAPGVVVTYNRNYVSNELLRSYGIKVLEINSSELSRGRGGPRCM…
207	AMQ96163.1	rpsH	30S ribosomal protein S8	0.0391	14831	9.15	Cytoplasmic	132	MVMTDPIADFLTRIRNANMVKHESLEVPASKIKRDIAEILKREGFVRDVEYIEDDKQGVIRVFLKFGKNGERVITNLKRISKPGLRAYVKADEVPKVLNGLGIAIISTSEGVVTDKEAREKNIGGEVIAYVW
208	AMQ97059.1	lpdA	dihydrolipoamide dehydrogenase	0.0389	49224	4.99	Cytoplasmic	468	MVVGDFAVELDTVVIGAGPGGYVAAIRAAEMGQKVAIIEREYIGGVCLNVGCIPSKALIAAGHHYQESLDSEMFGVTSENVKLDFAKTQEWKENKVVHTLTSGVGFLLKKHKVETIEGEAFFVDDHTLRVIHPDSAQTYSFNNAIIATGSRPIEIPGFKFGGRVLDSTGGLALKEVPKKFVIIGGGVIGAELGGAYANLGAEVTILEGSPQILPTYEKDLVKLVEDDFKKKGVTVVTNAMAKEAVDNGDSVTVKYAVDGKEESVTADYVMVTVGRRPNTDDMGLEQAGVEVGERGLITVDKQGRTNVPNIYAIGDIVPGAALAHKASYEAKIAAEAISGKKVAVDYKAMPAVAFTDPELASVGMTIKEAKDAGIEAKAYKFPFSGNGRALSLGKTEGFI…
209	AMQ97804.1	ntpC	ATPase V	0.0389	38603	4.75	Membrane	328	MEYHELNPLIRGRELELLSNETFERMIQTNSVEALGEILKSTIYSPYIYDGYEYDFEQNLLKEQSRLFRWLKESAPEPEIVWIYTMRYTFHNLKVLTKAEMTNQNLDHLYIDDGFYSLETLKDAIHTQVSNELPESIMDSIREVRDYFEESTILQGIDVIYDRQFLTEQRRLADKLGYQELLTEVIAFIDLTNITTMARGILQKRTYGFMTTVLSSSGSIEKEVFLNFVDKDMEDYTNFLLETDYADFLRPVIREGNLDLVKLEQLKDDYLSSLYQEAQTQAFGPLPLLAFLNAKEVESKNLRLLVIGKRSHFEPETIRKRVRQVYDA
210	AMQ97820.1	A5836_001478	ABC transporter permease	0.0387	38718	5.27	Membrane	356	MFLALNEIMHSKLRYALVAGVMFLIAYLVFFLTGLAYGLAQDNRTAVDKWEADSIVLSKDANSNLGMSMITKKIAEEVEGGKVAYLAQTPGVVTSKDSTEEGKINVSFFGIDKNQFIMPNLVEGKAFDNDDEAVGDISLKEEYGLAVGDTVKLSGSDKTFKLTGFTDHAKFNVSPVLYTTINAYQEIRFEKEDTSENARINAIVVRGKISNLPEDLEQIKISKFINELPGYNAQVLTFGFMIGFLIVIAAIVIGIFIYVLTMQKINIFGVMKAQGITGGFIARSVVAQTFILSFVGILLGLLGTVGTSLVLPDAVPFQSNWLFFGVISLLMLVVAVLGALFSVRTIVKIDPLKAIG
211	AMQ98142.1	rplL	50S ribosomal protein L7/L12	0.0381	12461	4.52	Cytoplasmic	122	MALNIENIVAELKEATILELNDLVKAIEEEFGVSAAAPVAVAAAGGAAAAEEQTEFTVELTAAGDQKVKVIKAVREATGLGLKEAKAVVDGAPAPVKEGVSKEEAEELKAKLEEVGASVTVK
212	AMQ96177.1	ecfA	energy-coupling factor transporter ATPase	0.0379	31143	4.75	Membrane	279	MEPIIELEKINYKYQPDDLRPALKDVSFTIDKGEWIAIIGHNGSGKSTLAKTINGLLLPESGIVKVGNQILDEENIWTIRQMVGMVFQNPDNQFVGSTVEDDVAFGLENQGIPREEMLVRVKDALEKVRMAEFASREPARLSGGQKQRVAIAGVVALRPDIIILDEATSMLDPEGREEVISTIKKIKEESQLTVISITHDIDEAANANRILVMRQGELVREGTPKEIFSAGPELIDLGLDLPFPEKLKSALKERGVDVPSEYMTEERMVDWLWTSVLNK
213	AMQ98288.1	pknB	serine/threonine protein kinase	0.0371	74904	4.67	Membrane	689	MIELGKKLNGRYQITGNIGSGGMANVFLAHDLILDRDVAVKVLRFDFQNDQTAIRRFQREALAATELVHPNIVSVYDVGEEDNMQYLVMEYVKGMDLKRYIQTHYPVPYETAVNIMQQILSAISLAHNHQIIHRDLKPQNVLIDNEGVVKITDFGIAIALSETSITQTNTMLGSVHYLSPEQARGSMATKQSDIYALGIILYEMLTGSVPFDGESAVTIALKHFQDDLPSIKALDPNVPQALENVILRATAKEPADRYKSAEEMSDDLSTVLSPARANEEKWQPHVMDNETKVITPLTEDAPMPDSFKSMPLPKDKPENETLPEEEEVLPDPKKKGQKKWWLILLAILAVLGIGTAVFFASGGRGEVVVPDVSDLSEASARETLAKAKLEVATKTEEIA…
214	AMQ97703.1	HMPREF1359_01862	hypothetical protein AX771_09520	0.037	28970	5.23	Cytoplasmic	259	MEKPFVKSLTAVAVGAGAIAICLFGYHINNQRQHQQRINYAESAITNQKDTLTSLSKEVDKLYSTKEKIFLNPEITEETITSLSNKLSSVKLSADDYDIKESELPKEAVAIQDEKKAIVTQLDSAESKLKIQTAVNDLFTKNVSNWQQAVDDVIIKEKVTSADVARVRENMSFFKDSPWKTVVMQYLGFADTQIAQVTQLDQLFDTMLKDGQVTATATYDQYLTALSQIEQIRNEKISAAYATKAQTVAQQMGYSNISY
215	AMQ98108.1	HMPREF1359_02529	hypothetical protein AX771_11930	0.0368	10014	4.83	Cytoplasmic	83	MKDYKLDFQSELPIEFVNEFKIEAPDKTRTLFTFNHDMILQEFEDDTVICVARDSEFLTIYSNRKFNQTIPVRSKKVIIYFEE
216	AMQ97402.1	uvrA	ABC-ATPase UvrA	0.0362	103703	5.62	Cytoplasmic	938	MANDKITIHGARAHNLKNIDVTIPRDKFVVVTGLSGSGKSSLAFDTLYAEGQRRYVESLSAYARQFLGQMDKPDVDSIDGLSPAISIDQKTTSKNPRSTVGTVTEINDYLRLLFARVGHPICPNDHIEITSQSVDQMADQVMALPERTKIQVLAPIVVKKKGQHKKIFERIQKEGYVRVRVDGEIYDLSEVPELEKNKKHDIAIVIDRIIVKEGIRSRLFDSLEAALRLADGYALVDVIGEEEMLFSEHYACPYCGFTVGELEPRLFSFNAPFGACPDCDGLGVKLEVDQDLVIPDRTKTLSQGAIVPWNPISSQYYPQMLAQACESFGIDLDTPFEELPEEHQEIILNGTDDLFHFHYENDFGGVRDVETTFEGVLKNIERRYHDTNSDFTREQMRLY…
217	AMQ96146.1	fusA	elongation factor G	0.0357	76663	4.81	Cytoplasmic	695	MTREFSLQNTRNIGIMAHIDAGKTTATERILYYTGKIHKIGETHEGASQMDWMEQEQERGITITSAATTAQWKGHRINIIDTPGHVDFTVEVERSLRVLDGAVTVLDAQSGVEPQTETVWRQATTYGVPRIVFANKMDKIGADFLYSVSTLHDRLQANAHPIQLPIGAEDDFTGIIDLVTMKAEMYTNDLGTEIEETEIPEEYRELAEEWREKLVEAVAETDEELTLKYLEGEEITEAELKEGIRRATVNVEFYPVLCGSAFKNKGVQLLLDAVLDYLPSPLDIPAIKGIDPKTDEEVERPADDSAPFSALAFKVMTDPFVGRLTFFRVYSGVLQSGSYVQNATKGKRERVGRILQMHANSRSEISEVYAGDIAAAVGLKDTTTGDTLCDEKSLVILES…
218	AMQ98635.1	AWT83_15995	ATPase (plasmid)	0.0354	77135	5.71	Cytoplasmic	674	MLEAIKTAFSPQNDQKVLDPLKQLGNREIEILKSKGYDLDFLKQVMPQGGLNFDEEYVTYGNGYSRCVTVYHYTKNPTLFWLANLMNNPHTVATLDVSTDEKQKVIDQINRALDELNDRSDNERKATDRNKSAEEYLELAEYARKLTSNGEISKQVKVRVHVYGNTIQEVDERAQELIKNLKGMDYRAVTYLHKTKRDWQSMFTMFDEQAEWFGNIKGQSLPSLNIGGGFPFHHQTLKDPGGTQYGETMTGGPFVWNATYKNSVRLSTNTLLLGMMGAGKSTVLKMIAEAHLAAGDFIWGFEKGKDFIPFLKEYNGIMVRLDGSDGMINPLEIFATRTYDEASSLYDDGSVKDLKINEAASYQTHLDKVVYQVQLVSPQLKGTMKAEFKTYLNRFYEEY…
219	AMQ96977.1	AS238_14650	hypothetical protein AX771_05200	0.0349	27241	5.3	Membrane	237	MKTRSDVSSNKTKKTNYWKFAFLILLGVVLGSTVFLGSRIFANREPELPEIPALTERQGDPVLTINSNKEKVNQIISFFLSEYQKDSDIEYKFYLENEALLNGTFEVLGFPIDFYLYFDPYVMENGNVQLKARSLSIGTLSLPIKDVMNMIKRNYKLPDWIEVNTDDLTIMLRLDQFRMQNGMYIKADKIDLVNDDIRFSLYLPKDTSDASNNSNTNKTSTSSTESKTKENKKSSDE
220	AMQ97263.1	amaP	hypothetical protein AX771_06885	0.0347	21663	9.32	Membrane	188	MNKGLKIIGVIMSLLLLSVFLAIALINAPYIMPEQLERFRFFTLTNYYMQQYIFWAAVVFAVLAIIILLVVLFYPKSRGTFVMKREDGKLTIDKKAIEGLVRSHLHEEEFIHSPKVRIRSTKNRIHIHVNGDLKRTSSLVGKTGVLMQDIEEEVTKVLGTKETVKVAVTYSGYEEQEDTRDYKHSRVE
221	AMQ98824.1	vanS	histidine kinase (plasmid)	0.0347	41396	5.21	Membrane	364	MYIVAIVVVAIVFVLYIRSMIRGKLGDWILSILENKYDLNHLDAMKLYQYSIRNNIDIFIYVAIVISILILCRVMLSKFAKYFDEINTGIDVLIQNEDKQIELSAEMDVMEQKLNTLKRTLEKREQDAKLAEQRKNDVVMYLAHDIKTPLTSIIGYLSLLDEAPDMPVDQKAKYVHITLDKAYRLEQLIDEFFEITRYNLQTITLTKTHIDLYYMLVQMTDEFYPQLSAHGKQAVIHAPEDLTVSGDPDKLARVFNNILKNAAAYSEDNSIIDITAGLSGDVVSIEFKNTGSIPKDKLAAIFEKFYRLDNARSSDTGGAGLGLAIAKEIIVQHGGQIYAESNDNYTTFRVELPAMPDLVDKRRS
222	AMQ98279.1	AS238_03145	hypothetical protein AX771_13090	0.0346	18842	9.64	Membrane	168	MNSSKKQMKNGNIYLVIALIVVIILFYSSSQTYGQQSQVSRLESWLPNQPFKDTLAGIRFNYGGSMVSIDHLGYAKFLEFFLRKGAHFGTYFILGGSLFLGVFPKLKIWWLTAILAWLSATGYAGLDEFHQMMTGGRTPMFQDVMLDSIGALTAVILCVLFAAFKKRL
223	AMQ97806.1	ntpK	ATP synthase subunit K	0.0344	16040	6.54	Membrane	156	MMDYLISQNGGMVFAVLAMATATIFSGIGSAKGVGMTGEAAAALTTSQPEKFGQALILQLLPGTQGLYGFVIAFLIFINLGNDMSVVQGLNFLGASLPIAFTGLFSGIAQGKVAAAGIQILAKKPEHATKGIIFAAMVETYAILGFVISFLLVLNA
224	AMQ97800.1	ntpD	V-type ATP synthase subunit D	0.0341	24715	5.07	Cytoplasmic	211	MARLNVNPTRMELTRLKKQLTTATRGHKLLKDKQDELMRQFILLIRKNNQLRQEMEESMTEAMSDFVLANASITEPFIEELFVLPAENVDLSIVDKNIMSVKVPVMNFEYDEQLTDTPLEYGYLNSSAELDRSIDRFTTLLPKLLELTEIEKTCQLMASEIEKTRRRVNALEYMTIPQLEETIYYIRMKLEENERAEVTRLIKVKNMGTTD
225	AMQ97112.1	fabZ	3-hydroxyacyl-[acyl-carrier-protein] dehydratase FabZ	0.0339	16173	6.11	Cytoplasmic	146	MSYVLSATEVMELIPNRYPICYIDYVDTLEPGKKIVATKNVTINEDFFQGHFPDNPVMPGALILETLAQAGSILILKSEEFLGKRAYIGGINKAKFRQKVVPGDVLKCHFEITKMKGSVGTALSAAYVDDKKVCECEFTFIVNQNA
226	AMQ97550.1	aroD	dehydroquinase	0.0333	27972	5.45	Cytoplasmic	252	MVRVKGLNIGSGRPKICAPLIGAVREEVLREAVLAREAGADLVEWRVDHYREVFSFDEVAETLVLIHEMLDGLPLLFTFRTLAEGGEQDISIRQYRDLYEHVIHTGLVDMVDIELFKVESLGKRLIEEIKSLNIPLIISSHDFKETPADPVLLYRLNVMEHFGADIGKLAVTPNNERDVLRLMELTRRANAFVSMPIITMSMGNLGKISRLVGGTTGSVMTFGSLSSDSTSAPGQLPVKALKQIIQLLNEPL
227	AMQ96976.1	A5836_002410	lipase	0.0331	33806	5.29	Cytoplasmic	298	MKLTKRHLILVLFPLLIAIIIYAGLAASIPKAGPLMKPVTTVREDPNKKEKLHYIAIGDSLTEGVGDQTKQGGFVPLVANDLKDRYNLTAVETENYGVNGERSDQILKRVKTKEEIRNNIKTADFITLTVGGNDLMKVIQNNLFGLTVNSFKKPLKNYQENVTELLEEFRSLNKTAPIYILGIYNPFYLNFPEITDMQTIVNNWNKGTETVTKKMPNCYFIPINDLLYQGLNQEVGVTEEGTDQTTSTTENLNGIKNNVLYEEDHFHPNNLGYQLMANAVRDQLIETQNQWLEKEDDQ
228	AMQ97810.1	ecsA	sodium ABC transporter ATP-binding protein	0.033	33959	5.57	Cytoplasmic	299	MLEVKDLVKTFGNYTAVDHVSFQIPDGKIMGLIGQNGAGKTTTFRLILDFLTQDQGEVLWNGHHLGEKDYDVIGYLPEERGLYPKVTIQDQLLYFAELRGKSRKEIEPKIDFWMEKFQVKGKKTDKVKSLSKGNQQKVQLIATLIHEPKLIILDEPFSGLDPVNAELLKDGILELKKHGSCVIFSSHNMDNVEKICDHLIMLRNGKMVLNGKVHEIRESFGRTKLFLESGLSQQEVEEIEGVKKVILHEDNTLEITLEDPEAGKEIFTRATQFGYIPMFNQQPPTLEEIFKLKAGEIDA
229	AMQ96863.1	AS238_15750	cell division protein FtsI	0.0322	78806	5.41	Membrane	717	MMKDFMKKILNTSWLEKIRKGAQEPKNKTFRRSHVPFRLNFLFFIIFTLFVALIARLGYLQIVNGEEMEARVKSTSTITVQESTPRGMIYDSTGKALVTNKANQAITYTRGTQVTAKDLLEIATKLNSLIDVPVDENLTDRDKKDFWLADPKHLKEATKRLSAKEKQLGNSEQYSAMVNKVTADEINLNEEQLKIATIFKRMNSAYELNTVYIKNSGVTDQELAVVAERASELPGVSTGTDWTREYNAASSLKSILGSVTTEKQGLPADEAEKYLAKGYSRNDRVGQSYLEKQYEDVLQGTKTQYEVSLDNEGNVSNQKEIFSGEKGSNLMLSMNAEFQSKVEEILKRNYQTLINNGKAQYSPGAYAVAMNPQTGEVLAMTGFSHEQGSKEITENALGT…
230	AMQ96849.1	yqeG	HAD family hydrolase	0.0319	19830	9.33	Cytoplasmic	175	MFSNYKPTWMVEAIYQITPAQLKNLGIKAVLTDLDNTLIAWNNPDGTEELLTWILEMKNAGIPVVVVSNNNSKRVARAIEKFDLLYVARAMKPLARGINIAKKQLDLADDEIVMVGDQIMTDIRGANRAGIRSILVKPIIATDSWKTQFNRFWEKRIMAYLLAKHPDMGWRGGIE
231	AMQ97740.1	phoU	PhoU family transcriptional regulator	0.0314	26041	5.23	Cytoplasmic	225	MLRTQFEEELLNLHNQFYEMGMMVSSAVHKSVRAYIKHDKILAQEVIENDININNMETRLEKKSFEMIALQQPVTTDLRMIITVMKASSDLERMADHAVSVAKSTIRVKGQTRIPEIEKEISDMSDYVKKMVDNVLVAYVKTDEKDARTIANMDQRVNDYFNRIYNATIKNMQENPETVISGTDYLNVASYLERIGDYVTNICEWIVYLATGKITELNTNHNEIF
232	AMQ97180.1	msrR	Cro/Cl family transcriptional regulator	0.0312	44170	9.53	Cytoplasmic	387	MSRMDRYKDIHKKAKPLKRDTGSIFARRERKRTRMENEEDATRIYEREQHSFEHLNQYEQQIYRDAPRAEEQQKNKKFFNRQKKNKPLKPRRKRSWKKIILSILLVLILYSGISFFIGKYVAEHDTSLEAATSETFHGQKATNGAHNILILGSDTRGEDAGRADTIMVLQLDGPSHKPKLISFMRDSFVTIPGVGQNKINSAYAYGGADLVRQTLVENFGIDCQYYAKVDFKSFEKVIDALFMNGVKIDAEKDLNLDGVDIKKGVQKMDGHVLLQYARFRMDEQGDFGRVRRQQQVMNAIFSQLKNPLNLIRAPYAAGKALGYTSTDVTAWFLTKNLFSIARGAGGIDRISVPVDGSWNYGQSDYAGSILEIDNQMNQSAITDFLNK
233	AMQ96771.1	hol	holin	0.0312	8072	7.88	Membrane	74	MNNKTFEVLKWFALVIIPALATFVGLVGKALNWQYTDICVVIITGFGAFLGSVLGVSNRTYKMFSAESEEGGNK
234	AMQ98642.1	HMPREF1359_00229	pilus assembly protein (plasmid)	0.0311	77428	9.01	Membrane	696	MNFKHSWTRRLKYVFPIMMMLGTLFGLKTANVFAEKVIVDPSNPIQNVKNNFIIPKDVPNAKTNITVNGASKVYKYHVDANKGGFTDDYVGLVEGNKNIRYPSFQKEYGETNLVLEGVTTNTKVNIGYGKIGTYNGKKVNIKLVLSNIHLYSDTLPWNLLDNNYTKTHFRDDGYKNTNGAMSKSKKRTVLWISDNLFSGIVYHSTQMNVQLVATYEDGSPVQFSGDTFISFNSLNPAGGKSTDLKGEYAHYDKMNTTDWYVRKDTVLSEFKSFYNNLNVVGGHSGGSSKLTQADNDFNNLHDKLGDPKFGQGTVSFKISEANPTFVIGSSNVQTWFTLSSATIFSVVPDQPEKTGVDKNGNNVNDKMLQVGDTIQYRIKQKVNRLGVDLLAVYDRFELI…
235	AMQ97363.1	aes	lipase	0.0311	38305	6.25	Membrane	337	MKKKILKFIGWFFGIILGIAFAIFLAFQLSPRPGAFLINHMFSNTVQITDKKTFDQAEKNVAKKTDLTYESKYKENTYDIYYPKNSKGPVPVLFWVHGGGFVGGDKSGVKEFATKLVSDANIAVVAMNYELAPDSEYPNQVLQVNELIKDLLAEEKDDKLLDMEQLFFGGDSAGSQIALQYAAIQTNDAYAKQMKIKQLLPKDSLKGTISYCGPVDLKLTAQQHSDDRFMKFFVKTVAWSLIGTKDWKTSEQLKEASVADHVSKEFPPTYITDGNAYSFQEQGQALENRLTELKVPVQSLFYTDTKKEITHEYQFDYTLKESQNCYQQTLDFVNKYK
236	AMQ96169.1	secY	preprotein translocase subunit SecY	0.0309	47499	9.55	Membrane	431	MFRLLKDAFKVKDIRSKILFTVFVLFVFRLGAHITVPGVNAASLQNLSSLPFFNMLNLVSGSAMQNFSIFSMGVSPYITASIVIQLLQMDIVPRFVEWSKQGEVGRKKLNQATRYLTLVLAFIQSVGITAGFNQYAQLGFVNNPNVATYVTIGLILTAGTMFVTWLGEQITEKGIGNGVSMIIFAGIISRLPESIREIYEDYFINIDPSDIWKSAIFVAILLVAVLLIVTFVTFFQQAERKIPIQYTKRVAGAPTSSYLPLKVNAAGVIPVIFASSFIATPNAVLQALSGRFGSENWYKVMMEIFNYNTAPGATIYTILIVAFTFFYAFVQVNPEKLAENLQKQGSYIPSVRPGKGTEEYVSRLLMRLSTVGAVFLGLVALLPIIAQMVWDLPQSIGLG…
237	AMQ96645.1	glnA	glutamine synthetase	0.0307	50568	5.06	Cytoplasmic	446	MVKKQITGEEIKRIIEEENVRFLRLMFTDILGTIKNVEVPVSQIDKVLENKMMFDGSSIEGFVRIEESDMYLYPDLSTWMIFPWESAHGKVARLICDIYNPDGTPFAGDPRGNLKRALKDMRDLGFTSFNLGPEPEFFLFKLDEDGGITTTLNDKGGYFDFAPTDLGENCRRDIVLELESLGFEVEASHHEVAPGQHEIDFKYADVVDACDNIQTFKLVVKTIARKHGLHATFMPKPLFGINGSGMHCNMSLFNDEGNVFYDKDGELELSETAYHFLGGLLKHARAYTAVCNPTVNSYKRLVPGYEAPVYVAWSGRNRSPLVRVPESRGLSTRLELRSVDPSANPYLAMAVLLQAGLDGIRNQITPPAAVDRNIYVMDEEEREAAHIQDLPSTIHNAIK…
238	AMQ96929.1	yoaB	ATPase	0.0306	96459	4.95	Membrane	888	MENKEQAQQAVYKETIDSLMQQTQSSTDGLSTTQAKEKLERDGLNQLKEKPKKPTWKLFLETFKDAMVIVLLIVALIQMVMGDYIEFLVIFAVLMLNSIISVVQTKKAEGSLEALKNLSAPDARVIRDGKEKTIPANELVVGDIVLLDAGDYVPADGRLLDAGSLKVDEGMLTGESTSAEKEVTDITSTVPIGDRTNMVFSGTIVTYGRGKFLVTSTGNNTEIGQVAGLLESTTEQVTPLQRGLDKFSKKLSLAILALSLLILGIQLFRIYLGEGTGDMTADIVSAVMFAVAVAVAAIPEALQSIVTIVLSLGTNKMAKRHAIIRKLPAVETLGSTSIICTDKTGTLTQNKMTVVDYFLGNGDTGDFTNDPSKWTADERRLIEISVLANDASISEDGTK…
239	AMQ97422.1	infB	translation initiation factor IF-2	0.0304	84525	6.4	Cytoplasmic	768	MGNKRIYELAKELKKSSKDVVEKAQQLGIDVKNHMGAITSNDEKKLQQAFKNPSTKQQAAQQASRKPANQQPNDQRKKETTNNQQKNKNNRSYQDRGQGSGQVNQGKKPTTNQNNTGNTSSQNRQGTSQGGNQNRTNNNNKPNNNNRGKFNNNNRNRYNKKGKKGKQQQSTKPAVPPRKFRELPDVLEYTEGMNVADIAKKIHREPAEIIKKLFMLGVMVNQNQALDKDTIELLATDYGMEPQEKVQVDIADIDKFFEAEEVDPDKLVSRPPVVTIMGHVDHGKTTLLDTLRHSRVTSGEAGGITQHIGAYQIDIDGKPITFLDTPGHAAFTSMRARGASITDITILVVAADDGVMPQTVEAINHAKAAGVPIIVAVNKIDKPGANPQHVMQELSEYEL…
240	AMQ96728.1	B1P95_06695	hypothetical protein AX771_03700	0.0304	23521	5.27	Membrane	211	MDGIFGFTGIVLFIIGLIMLIVRFIKKTNKKTPMILLIIGIIFTTVGFSLSSSNEANDNNKQESSSSDTQTTTSNSSNKSLTQFEEFLETNNHDWGAFLDSYYSITPATEQNTAFTKYISGKTYTFEGTVIESMTTRIAIIADKEYDDKSWNDISATPKVSYVIFAKDLNNADTFTKGDKVTFTGEISSRGSNIEKSYAQWDMINSKVSKK
241	AMQ97803.1	ntpF	ATP synthase subunit F	0.0299	11471	5.65	Cytoplasmic	103	MTHKIGVVGDKDSVLPFKLFGFDVRYGTTKQTVRQAIEEMAKNEYGVIYVTEQCAALSPETIERYKEQMIPAIVLIPNHQGSLGIGLEEIQKNVEKAVGQNIL
242	AMQ96865.1	yidA	haloacid dehalogenase	0.0299	30012	5.57	Cytoplasmic	269	MNKKLIAIDLDGTTLNQDSMITSKTKETLKKAINAGHHVSIATGRPFRMSHQFYQQLELTTPMVNFNGALVHIPNQHWDGERETLINREIAFEILSQKKQLNLDFIAAENRDTFFIDSFDFFDEKIFASSRPGEKNLLSPKNLTTNPTSLLVRTDKRFAGAVSAELTRQFGSYVDVRTWGGPTAILEIVSKGIQKAKGVQEIANYLSIDQKDVIAFGDEHNDLELLDYAGWGVAMANGTDQLKGIANDVTPLSNQEDGLAVYLEKLLKL
243	AMQ96691.1	A5836_000101	hypothetical protein AX771_03460	0.0298	14592	9.66	Cytoplasmic	124	MVQSINTKVDLVIDATSFTGLTDYGQIMIGDNGFEFYHARDRRKYIQIPWEEVDYVLASVMLKGKWIPRYAIQTKKNGTYTFSSKEPKKVLRAIREYVDEDRMVQSLSFFDVVKRGIRSMFKRK
244	AMQ98641.1	CUM68_08355	hypothetical protein AX771_14730 (plasmid)	0.0298	17644	9.26	Membrane	154	MKKLIIVVTSLIAMIVILVGCSNEKNKQTNQDNGVLKSGTMWKEEVGGLVYNLKIIDETTWEYSESVWHPDPVQITVKRQKDYKGLERYKIVDSASVREFINKSDSLFIVVPYEKNGVKKIIFLGSSKDEKRTKEKLIHDGSQSNKYKLQKTSE
245	AMQ97775.1	secG	preprotein translocase subunit SecG	0.0295	8436	9.99	Membrane	78	MYNLILGIVIVLSIVMVIAIMMQPSKQNSAASAFTGGADQLFGKQKARGFEAVMQRSTAVMGAIWMILLFVLAYLSSK
246	AMQ98145.1	rplK	50S ribosomal protein L11	0.0288	14838	9.52	Cytoplasmic	140	MAKKVEKIVKLQIPAGKATPAPPVGPALGQAGINIMGFTKEFNARTADQAGLIIPVVISVYEDRSFTFVTKTPPAAVLLKKAAKIEKGSGEPNKNKVAKVSSDQVREIAELKMEDLNAANVEAAMRMVEGTARSMGITVE
247	AMQ97664.1	asnS	asparagine--tRNA ligase	0.0287	49722	5.27	Cytoplasmic	432	MEQIQIIDSKNHVGETVTIGAWVANKRSSGKIAFLQLRDGTAFFQGVVVKSEVSEEVFQTAKNLHQETSVLVTGEIREDSRSKFGYEIGITNVEVVSESHDYPITPKEHGTDFLMDHRHLWLRSSRQHAIMQIRNEIIRATYEFFNQHHFVKIDPPILTGSAPEGTTDLFETNYFDQKAYLSQSGQLYMEAAAMAFGKVFSFGPTFRAEKSKTRRHLIEFWMIEPEMAFTHQEESLEVQEQYVAFLVQNVLDHCEYALDVLGRDKEVLKTYTKLPFPRITYDDAIELLKKNGFDDIEWGEDFGSPHETFIANSFEQPVFILNYPKAIKPFYMKPHPTREDVVICADMIAPEGYGEIIGGSERATDYDFLLEQIRNHGLDEKEYSWYLDLRKYGSVPHSG…
248	AMQ96844.1	fabF	beta-ketoacyl-[acyl-carrier-protein] synthase II	0.0287	43386	5.18	Cytoplasmic	411	MNRVVITGYGVTSPIGNDADSFLNSLKEGTNGIAPITKFDASETGITLAGEVKDFPYDKYFIKKDSKRMDMFSIYGIYAALEAMEMSGLDKEKMNQDRFGVIIGSGIGGLPTIENQVIRLHEKGAKRVSPMFVPMAIANMAAGNIALRVGAKGICTAIVTACASGTNSIGEAFRNIKHGYSDVILAGGTEATICEMGIAGFAALTALSESTDPNRGSIPFDENRNGFVMGEGAGVLVLESLEHAQARGAKIYGEIVGYGANCDAYHMTAPTPDGSGASKAMKLAMEEAGVQPEQVGYINAHGTSTPANDQAEAKAIQIALGENFRDTYVSSTKSMTGHLLGAAGGIEALATLLALEHQFIPPTINVEKQDPEIDLTVVKNESKPASFTYAMSNSLGFGG…
249	AMQ98072.1	HMPREF1359_02356	phage tail protein	0.0287	113048	5.09	Membrane	1039	MEQFSVEALLKATDSGFVKTFKDAQDAVKTFEKNSNSMTTAVGKVMQGTGAAMTKYITTPLIGVGVAAAKVGGDFEEQMSRVKAISGATGKSFDELRQQAVDLGAKTAFSAKESAAGMENLASAGFSAQEIMKAMPGLLDLAAVSGGDVALASENTATALRGFGLEASEAGHVADVFARAAADTNAEVGDMGEALKYVAPVANSMGISLEETAAAIGIMSDAGIKGSQAGTTLRGALSRLARPTKAMQDTMDNLGVSFYDADGKMKPLKTQVELLKKAFEGLTPEQQQNALVTLYGQESLSGMMALIDKGPDSLGKLTKSLKDSDGAADDMARTMQDNMNSSIEQMFGAFESAAIVIQKILAPSIKKVADAISGLVEKFVSAPESTQKLVVAIGAIVAA…
250	AMQ96980.1	lepB	S26 family signal peptidase	0.0285	21299	9.4	Membrane	183	MTKKQRYINRFWLVFKYLLVSVFLAFMLRGFLFIPVPVEGNSMENVLKQGDMVVMEKFSEIRRFDIVVFQLADGTIYIKRVIGLPGENVSYQNDQLKINGKVVKEPYLTKNLKSDHANASYTTDFTLQELTGQSKLPEDNYFVLGDNRRVSKDSRSFGTINKTDILGKARFVYYPLDEIKWIQ
251	AMQ96847.1	accC	acetyl-CoA carboxylase biotin carboxylase subunit	0.0283	50015	4.89	Cytoplasmic	459	MFSKVLIANRGEIAVRIIRACRELGIQTVAIYSEADAEALHTQLADEAICIGPAKAVDSYLNVQEVLSAAIVTKAEAIHPGFGFLSENSRFASMCEECNITFIGPKSATIDAMGNKINARQLMQEANVPVIPGSTGVLSTVEEALEIADRIGYPVMLKAAAGGGGKGIRKVQSKEELPQHFSSAQQEAAAAFGNDDMYLEKIIYPARHIEVQILGDRFGHVIHLGERDCSLQRNNQKVLEESPSVVISQTKREALGDAAVRAAKAVNYENAGTIEFLMDEEGDFYFMEMNTRIQVEHPVTEMVTGIDLVKKQVEIAAGEPLNVCQEEVVFQGHAIECRINAENPAFHFAPSPGKIQNLLLPAGGMGLRVDSAVYPGYTIPPYYDSMIAKIIVHGNTRFE…
252	AMQ98086.1	EFUG_01715	terminase	0.0282	50294	8.12	Cytoplasmic	432	MAKKLSEFLPPKFHSVWRATLNQDILNIVCKGGRGSGKSSDIAHIVTQLLMRYAVNAVGIRYVDNTLEQSLYEQMKWAIEQQGVSHLFKFNKSPLKITYLPRGNYMIFRGAQNPERIKSLKDSKFPFAIGWIEELAEFKTEDEVTTITNSLLRGELDDGLFYKFFYSYNPPKRKQSWVNKKYETSFQPKNTFIHHSTYKDNPFISKEFLSEVEAARARNPRRAEWEYDGKAIGSGVVPFDNLRIEAGSITDEMVANFDNIRQGLDYGYATDPLAFVRWHYDKKRNCIYAIDELYEVKCSNRRAAQWIKSNKYHYQDIIAEVEPKSNAEMRNEHDISKIRQVTKGPDSVEYGEKWLDDLDAIYIDPIRTPNIAKEFENIDYQTDRDGNPKPRLEDKDNHT…
253	AMQ96107.1	ssb	single-stranded DNA-binding protein	0.0279	18441	4.89	Cytoplasmic	170	MINNVVLVGRLTKDPDLRYTASGTAVATFTLAVNRNFTNQSGNREADFINCVIWRKSAETLANYARKGTLLGVTGRIQTRSYDNQQGQRVYVTEVVADNFQLLESRSASENRQQSGGFQSSGQSAGGFGGNNNSNQTSQSSNGMPDFDRDTSDPFGSSSTIDISDDDLPF
254	AMQ97872.1	clpP	ATP-dependent Clp protease proteolytic subunit	0.0279	21664	4.79	Cytoplasmic	197	MNLIPTVIEQSSRGERAYDIYSRLLKDRIIMLSGQVTDDLANSIIAQLLFLDAQDSEKDIYLYINSPGGSVTAGMAIYDTMNFVKADVQTIVMGMAASMGSFLLTAGTKGKRFALPNAEIMIHQPLGGAQGQATEIEIAARHILQTRERLNKILAERTGQPLEVIEKDTDRDNYMTAEQAKAYGLIDEVMENSSSLN
255	AMQ97730.1	AS238_07655	general stress protein	0.0275	15270	8.86	Membrane	146	MSGGEIAGLIAAIAFAILVVFIVRVLLQVSKTLEKVDQTVAEANTTIEIVTKDVDLLSRQVEGLLVKSNELLLDINGKVATIDPLFTAVADLSESVSELNHSSKNIATKVGGIGKTTAKATVAGKVGGTAMKFFKNKKHTETTGGK
256	AMQ96438.1	AS238_04660	permease	0.0272	67911	9.3	Membrane	600	MLWKLSLTGIKSRLRDYLVLFSGLVMASAIFYMFESMASNEAFLKSNTIVAATVIIFRFGSVLLGIITFVYILYANSFLMTMRQKDYAMFMMLGAKGRKIAQMIFSETFLVGIAATLVGSAVGVGLTSIVHRLLVDQLDLNISHFTPFSIHGLLITVLFFAVLFLLAAVVNAFSIVKKPILALIRADQTPTRIKQHKFLFFLEVVLGIAFLGCGYYMMKHVGTYQVFGIGVALVTIVLGTYFIFHSVIIFFLSLLKKSEQISLKKLNNFTLSQLNFRIREYTQMLSMVAMLFALALGALTVGLGFKNEIADLTENNSGYDLVMNNPRAEDQQKIKELSPTLSASYTQKEDAGTIYYNASEFAAQPLIMIKHEDGTPPKITKEKVPAKKMNELTVQEELR…
257	AMQ97551.1	AS238_14580	SAM-dependent methyltransferase	0.0272	44867	5.99	Cytoplasmic	392	MKVKVKKRASNRLKKGYPLIQKEDLAHPQKETTQWVELVDSQNQFIAKGYLGKQNKGIGWVLSQQNIPFDQSFFEEFFVKSKEKRTFFFSDDSTTAFRIFNGEGDGIGGLIVDYYAGYAVFSWYNETLYAHRELLIQAFREIYPEIIGGYEKIRFESVNLPESQFIYGKEAPEPLIVKENGVKFAVYLNEGLMTGIFLDQKEVRGSLAEGFASGKTVLNMFSYTGAFSVAAAMGGAIETTSVDLAKRSLKKTQEQFEVNGLDVDQQKIIVMDVFEYFKYAKRKQFLYDMIVLDPPSFARNKKKVFRVAKDYGELVKDSLDILAEDGILIASTNAANVSIEQFQTMIEEEFHAKNVSFEQLALYRLPKDFQTTDTFLEGNYLKVFVYQIKNNH
258	AMQ97764.1	atpC	ATP synthase F0F1 subunit epsilon	0.0271	15551	7.03	Membrane	140	MDQYLTVNVVTPAGLVYDHHAAIVVARTTAGELGILPKHAPIIVPLTIDEVRVKRTDSDTHVDWIAVNGGIMEVRDNVVSIVADSAERERDIDVSRAERAKQRAERQIEEAKAKQDTNELKRATVALHRAINRIKVSKHS
259	AMQ97783.1	pgk	phosphoglycerate kinase	0.0267	42087	4.91	Cytoplasmic	396	MAKKTVKDIDLKDKKVLVRVDFNVPLKDGVITDGTRIKAALPTINYVLEQGGKAILFSHLGRVKTEEDKEGKSLAPVAKRLGELLGKEVTFVPETRGEQLEEAIRNMNDGDVVVFENTRFEDIDGKKESKNDTELGKYWASLGDVFVNDAFGTAHRAHASNVGIASTGIPTVAGFLMEKEIKFIGEAVEEPKRPMIAILGGAKVSDKIGVIENLIPKADKILIGGGMTYTFYEAKGIKIGNSLVEADKVELAKELIEKAGDKLVLPIDNVCAPEFSNDVETQVIEGDIPDGLMALDIGPASVKLFADTLQGAKTVVWNGPMGVFEMSNFAKGTIGVCEAIANLEGATTIIGGGDSAAAAEQLGFADKFTHISTGGGASLELLEGKELPGLAAINDK
260	AMQ96435.1	AS238_04675	hypothetical protein AX771_01925	0.0264	32461	5.36	Membrane	290	MREKRAFYINGYAGIVGLVVLALVGLFFFYLGMWQAKVWALFLSIFLWLITLLLLSSATVVSPNQAKVILFFGQYLGTIRENGFFLTIPLAQKMTVSLKVRNFNSSVLKVNDLDGNPIEISAVVVFKVVDTAKALFDVAYYQDFVEIQSETAIRHIASQYPYDTFNENDLTLRGNTTAVSDELQKELQERLAVAGVEVIETRLNHLAYATEIASAMLQRQQAKAILSARQTIVEGAVTITQMALEQIEDGQEINFTDDRKVQLINNLLVSIITDKGTQPVINTGDMKDRK
261	AMQ96938.1	tuf	elongation factor Tu	0.0258	43190	4.82	Cytoplasmic	395	MAKEHYDRSKPHVNIGTIGHVDHGKTTLTAAITTVLGKKGLANPQDYASIDAAPEERERGITINTAHVEYETEKRHYAHIDAPGHADYVKNMITGAAQMDGAILVVSATDGPMPQTREHILLSRQVGVKYLIVFLNKVDLVDDEELIDLVEMEVRELLSEYGFPGDDTPVIKGSALKALQGDPDAEAAIMELMDTVDEYIPTPERDTDKPLLLPVEDVFSITGRGTVASGRIDRGAVRVGDEVEIVGIKPETQKAVVTGVEMFRKTLDYGEAGDNVGVLLRGIQRDDIERGQVLAKPGSITPHTKFKAEVYVLTKEEGGRHTPFFNNYRPQFYFRTTDVTGTITLPEDTEMVMPGDNVTIDVDLIHPIAVENGTTFSIREGGRTVGSGIVTEIEA
262	AMQ96308.1	AS238_02020	peptidase	0.0255	12806	6.14	Membrane	116	MYEESELSYFKGGLAVGIGLGLLSGVASTIWYHRKKVLSADQVLENIKSSFLKEGAIEGSWISFEKEPIRKFAVRSSAYRGGLSRIEDGETVYYEFLADAHTGTVLEISRKKGATD
263	AMQ98017.1	AS238_05070	hypothetical protein AX771_11380	0.0255	29837	5.73	Membrane	255	MTFLLDLINGVHKFLGYLDISPKYLNRGYTILSVIPTLYLLRIVYGLWQNQNYLQFFLYGLAFLVLVYFTVLNVFYYFLDKNTKADVTQLFVKYLPDEAFNIQTEESIDNGNSIDKVNTQEVMVSYDEDYQLKLAENMRYLIGNGEIKTNELGRMDGFLVDRNTLYPYYYVKKTGEKEYVLNIGRSYSDMEKVGTIRLDSTEDTLEPVGLFIVGGDFVKDGLRYHEPYRLKLIAKKAQSQEEPVVYSRSQRRRHS
264	AMQ96842.1	fabD	ACP S-malonyltransferase	0.0253	33399	5.15	Cytoplasmic	305	MKTAFLFSGQGAQYQGMGKDLYEEAVVKQTFDEASEILGYDMAELCFTENERLDQTQYTQPAILTVSIAYYRLLKEHGIIPDAALGLSLGEYSALVASNALSFTEAVALVAKRGAYMTEATPAGSGKMVAVMNAPIETIEESCHEASKYGIVSPANYNTPQQIVIGGEEKAVDEAVLLLKEKGFKRMIPLNVSGPFHTAILEPAAKKLAKDLSQIQFSEPSFPIISNTTTEIMKKETIAGLLEQQVMQPVRFYESIHKLKTIGIEQVIEVGPGKVLSGFMKKIDKTIPVLRVENKQTFDETIAIL
265	AMQ98256.1	sdrD	collagen-binding protein	0.0251	112723	4.34	Membrane	1023	MRNKFHKLLSMFLVMLIVINQFGNITVLAESLAEQPERSLTIEVDQEEAALGEQFQLRVRGTPDLLNALVIDKSEDLIEGEVKQLNDYERLITYSSQHSGKYELTARSGDIQSNTVSIEISVPEESTSESFNVPEESTSESFNIPEESLSESFNEARSSEPSITQESQIERQEELLNYDIGISAERPTLPSRHTQTLKGYIQGGAGDILEEYGEMVVRVPRASIGLIEFIRVEVADDSPLKPLAFYQEGTDVVFPFTFDYEGLNEAAQSYTFSITFEVAFFQSGGTEPNNDFQVSLTYAERAANTEFSITPIPSSRPIFSKLYYGSREIDSQGNLGNLLIDGQDVTNSNKFILQVNYEGSRKDGVVVTDVLPQGTTLAPNPTTWSSTGNREPISGGVRI…
266	AMQ97449.1	A5810_000889	hypothetical protein AX771_07960	0.025	5939	10.21	Cytoplasmic	55	MKKFVSGILVGSLATAAAVAGLVASVKKTVIDPIDEKEAMIEENRKKAMRKRVSR
267	AMQ98433.1	apbE	thiamine biosynthesis protein ApbE	0.0247	40856	5.3	Cytoplasmic	367	MRKKLLFSLITLGISFMVLTGCSNSANKTTTESSAATKILKDPYSDEQFLLGTYVRIRVYDEGKESTLKPAFDRVKELGDKITINQKGSEIDEVNEQAGIKPVKVSDDVYTLVKRAYEYSQDSQGGFDMAIGAITQLWRIGFDDARKPSQEEIDQALKLVDYHKIELNDKEKTVYLKEKGMIIDLGAIAKGYITDEVVKVLKKQGVTTAIVDLGGNVYVLGHSPRGENQDWTVGIQDPNMARGSVLGSIKERNKTLVTSGIYERYLEVDGKKYHHLFDPKTGYPFDNDIASVTIITDKSIDGDGLSTAVFSMGVKKGLEYVESELNNGTEAIFVTKDDKVYVTDPIKDTFKLSEDSHYTMGDRSELK
268	AMQ98265.1	yheI	multidrug ABC transporter ATP-binding protein	0.024	62846	6.2	Cytoplasmic	570	MKLILRHAKKYKVAVFISLLSVAVMVAAALWQPKLLQQVLEAIITEDNDEMKTIGIYLISLALLGLAAGVTNTIFSAKVAQGVSADIREEAFRKIQTFSFGNIEQFSAGNLVVRLTNDITQIQNLVMISLQSLFRIPFLFIGAFILAMITMPQLWWIIVALIVTVFLITALSFTRMGKHFMIIQKLIDRVNSIAKENLLGIRVVKSFVQEENQLKSFSKVSEDLTKHNIIVGTLFSVMIPSFMLAANLAVVGAIFFVSDLVKDDPTLIGGIASFMNYLMQIMMAIIIGGMMMMMTSRAAVSLKRIAEILDAEPDLTYLDVPEQELTGSVTFDHVSFRYPGEDTDTLKDISFSIKPGEMVGIVGATGAGKSTLAQLIPRLFDPTEGKVEVGGVDLRQVNE…
269	AMQ97731.1	galU	UTP--glucose-1-phosphate uridylyltransferase	0.024	34653	5.33	Cytoplasmic	312	MKVKKAVIPAAGLGTRFLPATKAMAKEMLPIVDKPTIQFIVEEALKSGIEDILIVTGKAKRPIEDHFDSNIELETNLSEKGKTELLKLVEETTDVNLHFIRQSHPKGLGHAVLQARAFIGNEPFVVMLGDDIMEDEVPLTQQLIDDYERTHASTIAVMQVPHDETSKYGIINPGEVLEDGLYNVKNFVEKPDPSKAPSDLAIIGRYLLTPEIFDVLSEQQPGAGNEIQLTDAIDTLNKTQRVFARKFTGKRYDVGDKFGFMKTSIEYGLTHPEVGAPLREYILSLGKTLEAEGSKIDHNPKGITEIKEEKKK
270	AMQ97235.1	malX	sugar ABC transporter substrate-binding protein	0.024	45158	4.48	Membrane	414	MKQLGLGLISLGILGGLAACGNGNSSAEGEADEGKTLTVSVDSGYKDYINEIKNTFEKENDVKIKLVEKDMFDQLESLALDGPAGKGPDVMMAAYDRIGALGQQGHLAEVKLGNEAAYDETDKAQVTYDGKIYGEPAVIETLVLYYNKDLVDTAPSTFKDLENLSKDSRFAFESEAGKNTGFLAKWTDFYYSYGLIAGYGGYVFGDDGTNPSDIGLNNAGAVEGISYATDWFKNVWPKGMQDIKSAGDFASQQFMSNKTAAIIDGPWQAQTYKENNINYGVAKIPTLNNGQPYQPFGGGKGWVVSNYAKNKDLSQKWLDYVTNQENQEKFFEMVNEIPANQQARETAKAKNDELTTAVIEQYETAQAMPNIPEMGEVWTGAENLMFDAASGSKTPKESA…
271	AMQ96109.1	rplI	50S ribosomal protein L9	0.0239	16852	9.4	Cytoplasmic	150	MKVIFLQDVKGKGKKGDIKEVPAGYAQNYLIKNNLAKEATKSSISQLAGQKKAQEKHEAEILEEAKKLKEFLEKEDTVVELKAKAGEDSRLFGSIPSKQIAEGLNKQYKIKLDKRKIELENPIRSLGYTNVPVKLHHEVTATIKVHVVQE
272	AMQ98403.1	B1P95_02540	manganese ABC transporter ATP-binding protein	0.0239	27673	7.68	Cytoplasmic	246	MLEVKKLNVCYNDFLALNEISLKIQEGALTGIIGPNGAGKSTLLKAMLNIIPHQGEVSINNEDINKKLVKIAYVEQKADIDFTFPIKVKECVSMGTYAGMKVFQRIKNAEWQRVSKALEKVDMGKYSNHQIGELSGGQFQRVLLARCLAQNADFIFLDEPFVGIDLVSERIIMDTLKELKHQGKTVLIVHHDLSKVKKYFDNIILLNRNLIAHGSVESVFNEENLKKAYGDTIFIGETNYIESSKN
273	AMQ96247.1	udk	uridine kinase	0.0237	24111	5.36	Cytoplasmic	209	MTKSKPIIIGVTGGSGSGKTSVSRAIFNNFPDHSIMMLEQDSYYKDQSHLSFEERLNTNYDHPFAFDNDLLIQHVGDLLNYKAIEKPVYDYVAHTRSQATIIQEPKEVIILEGILILEDERLRDLMDIKVYVDTDDDIRIIRRIKRDMEERGRTLDSVIEQYLTVVKPMYHQFIEPTKRYADIIVPEGGENHVAIDLITTKVASFLNHK
274	AMQ96587.1	AS238_10220	DUF305 domain-containing protein	0.0235	17089	9.43	Membrane	147	MKKYWKFLLMIGVSTVVMFGMMYLNVYALDHIFFSRTRVFMALMMGAVMAVIMLLFMWKMYENKKINVMILAASLLVFAGSLFMVRSQTTVNDTAWMKAMIPHHSIAILASKRADLKDPEVKKLAEEIIQAQEEEIDKMKKMIKEME
275	AMQ97116.1	AS238_08440	alpha/beta hydrolase	0.0235	35084	5.55	Membrane	311	MKLWMKILLGVALALIVALVFAGNYFYNYAVVPSEKDFLDEDTPGTTQTSKETDAHKWFSSKENRSDWTITSKDGLKLSAIYLPAETKSEKTALVAHGYMGNAETMTNYAKMFHDMGYNVLVPDARGHGKSEGDYIGFGWPERKDYVQWINKVLENNGKSQEIVLYGVSMGAATVMMTSGEKLPDNVKAIIEDCGYSSVHDELAYQLDDMFSLPAFPLMQVTSLVTKVRAGYFFGEANAVEQLKKNQRPMLFIHGDEDTFVPFEMLDKVYRATKGPKEKYVVKGAEHAEAYKTDPEKYQQVVQQFLSQYVH
276	AMQ98305.1	adcA	zinc ABC transporter substrate-binding protein	0.0235	35055	4.71	Membrane	312	MKKYLLTATVMIGALLFAACGNTNKEADKKEDLTIVTTFYPMYDFTKEIVGDEGNVKLLIPAGTEPHDFEPSAKERAEISDADVFVYNSSDMEFFVDSLKDSVDSKQTLMIEAAKGIDRLESQEADEHEESEEGHGHSHEYDPHVWLDPVLAIKEVRTIAEELGEKYPDKKETFTKNADAYIKKLEALDQKYSDELKDATNRTFVTQHAAFAYLANQYDLKQVAISGVSPDQEPTPSRLAELKEFVKKNNIKVIYFEENASSKVAETLSNETGVKLEVLNPLESLTNEQIKAGENYISVMEKNLKALKESIN
277	AMQ97067.1	AS238_02170	hypothetical protein AX771_05735	0.0234	13595	6.85	Cytoplasmic	112	MQLDNSEFEITKRRGLIVWVYSLKQLKNLKKFGLLHYVSRRMKYVVLYLNEETLEETEERIRKLHFVRNVERSYRPDIEMNFAEKIGNKTVLKDEGFEIEELNTEIRLAEHL
278	AMQ98123.1	AS238_09695	fatty acid-binding protein DegV	0.0234	31626	5.1	Cytoplasmic	286	MKNNKIAILVDSGTDVPEELIKKYEMYMIPLKIIYKDQVYTDKIDITSEEIYQRLPEEIPGTSLPDGESITEIFEQIKKDGYEKVLAVTISSGLSGTYNVVRLIAQQQEELEAYVLDTKNIGIGAGFSAIQAAKWLEEGVEWDQLISNLNELVERTKVFFNVATLEYLQKGGRIGLVASIVGTALKLNPIISCNEEGIYYTVGKARGRKKSLDKTVAYVKEKIGNAKVFNLAVAHGDAKEEAIEMEARLKREFPQANQIYFGQISPALVVHTGPGLLGVGVQVLEG
279	AMQ97400.1	racX	aspartate racemase	0.0234	27922	4.73	Membrane	243	MENFFSILGGMGTMATESFVRLINHRTKATKDQEYLNYVLFNHATVPDRTAYILDRSEENPMPFLLDDIEKQNLLRPNFIVLTCNTAHYFFEELQAATDIPILHMPREAANELVRQHTTGRVAILGTEGSMKAGIYEREVKNLGFETVIPDTALQEKINYLIYHEIKESDYLNQELYYEILEEAVERLNCEKVILGCTELSLMHEFAEDNHYPVIDAQSILADRTIERALAERSEALDTASEK
280	AMQ97733.1	lgt	prolipoprotein diacylglyceryl transferase	0.0232	31755	9.19	Membrane	276	MLAQINRVAFELVGIPIYWYALIIVSGIIIAMWLSSREAVRVGLKADDVTDFMLWGLPISIIGARLYYVLFDLPQYIADPIQIFNIRSGGLAIYGGLIAGAITLYFFTKYHFISLWTFLDIAAPSVLLAQAIGRWGNFMNHEAYGPDTTRSFLESLHLPQFIIDNMYIEGIYRQPTFLYESLWSLIGFILLLFLRKKPHLLKKGEVLLCYLMWYSFGRFFIEGLRTDSLYFLGVIRISQLLSAVLFVGTLILFIWRRKKGNLPDYDRSLGKNQQII
281	AMQ98234.1	pbp2A	penicillin-binding protein	0.0231	79388	5.35	Membrane	723	MDFQSILEKIKAALISFWRWIRPYLGQFHRWRKRIWKKYHVNKLILLIGLICVLVTSIYLFILAKQANVETLKSGLSQSTVIYDKKNEEAGTLYAQKGTYVELNAISPYIQDAVISTEDRNFYEHHGFDIKGIARAAVRMVLSGGTSGGGGSTITQQLAKNAYLTLDQTFDRKAKELFLAIEIEKKYSKEEILTMYLNNAYFGNGVWGVQDASRKYFGVDATNVTLSEAATLAGMLKGPGIYNPIDHPKNANDRKNTVLSVMEENGKITKEQEQAESQTDISAYLNDTYDNSDSGYRYPYYFDAVIDEAVNEYGLDEEDVMNKGYKIYTALDQDYQKQLEATYQNSALFPANASDGAMVQSASVALDPNTGGVQALVGRRGDHVFRGFSFATQMRRSPG…
282	AMQ97762.1	A5810_002189	hypothetical protein AX771_09865	0.0223	6597	9.99	Membrane	58	MSNQRYILLTLIKILVVILLLILLFVAGTMIGYGVIGGGNPFKVFQPSLWIHIRDFFH
283	AMQ98436.1	clpC	ATP-dependent Clp protease ATP-binding subunit ClpC	0.0221	92703	6.31	Cytoplasmic	830	MEELFTERAQAVLEIAQEEAKRLKHQSVSSEHVLLALVVEQNGIAGKVLREMDLNETEIYEEIEHLIGYGGIRSYPKGVFLPYSPRMKQVFALASSEVKKTGSQKVGTEHILMSLLKDESIMATRIMINLGISLSKARQVLKQKMGLAGDSAGKGMNRRRNVNVQDKRQTPQGTPTLDSLARDLTKLAKENKLDPVVGRSREVKRLIQILSRRTKNNPVLVGEPGVGKTAIAEGLAQKIILGEVPEDMQEKRLMMLDMGSLVAGTKYRGEFEDRMKKVIDEIYNDGQVILFIDELHTLIGAGGAEGAIDASNILKPALARGELQTIGATTLDEYQKYIEKDSALERRFARIQVDEPTPEEAEVILQGLRTRYEEHHGVEITDEAVRAAVNLSVRYITSR…
284	AMQ96848.1	accA	acetyl-CoA carboxylase carboxyl transferase subunit alpha	0.0218	29287	5.7	Cytoplasmic	261	MDKTAHDVVQLARAKERWTSLDFFEEIFDSFEECHGDRLFADDEAIVGGIARLDGKPVTVIGIQKGRDLQENIRRNFGSPHPEGYRKALRLMKQAEKFNRPVITLINTAGAYCGVGAEERGEGEAIARNLLEMSDLKVPIIAIIIGEGGSGGALALGLADEVWMLEETIYAVLSPEGFASILWKDGSRAAEAAELMKITAPELRELGIVDRVIPETFNGEQLPRYKVAHIMKKALIERLTELVRLDQHKLLEKRYKRFRQY
285	AMQ98277.1	AS238_03135	hypothetical protein AX771_13080	0.0218	52024	5.04	Membrane	466	MTRSSHRKKSKHVALLSVLGVLLVLISFYTYRSTYYTKHFLPNTEINGINVSNLTVEKANEKLKEAYSDKKLAIKEDGKVWQEVPKSELGYKDDFTSELSPILNEQNGWTWGMTYVSAAEKQEIDPVSQNHQKLDTTVQTLTTKLTDLNKDRTPTTDATIEKAGDSFVIKPEVNGNTIDVDAAVKQLKSAVNSGKDTIELTEFKEKPKVTSEDSSLKEQLASMNAIANVKATYSINGETFQIPSSDIMSWLTYNDGKVDLDTEQVRQYVTDLGTKYNTSTNDTKFKSTKRGEVTVPVGTYSWTIQTDSETEALKKAILAGQDFTRSPIVQGGTTADHPLIEDTYIEVDLENQHMWYYKDGKVALETDIVSGKPTTPTPAGVFYVWNKEEDATLKGTNDD…
286	AMQ96176.1	rplQ	50S ribosomal protein L17	0.0216	14306	9.97	Cytoplasmic	126	MSYRKLGRTSSQRKAMLRDLTTDLLINERIVTTEARAKEVRSTAEKMITLGKRGDLHARRQAAAFVRNEVASVREENEDIVIESALQKLFNDIAPRYAERQGGYTRILKTEPRRGDGAPMVVLELV
287	AMQ97747.1	ftsX	cell division protein FtsX	0.0216	33438	8.94	Membrane	297	MDTMIRTFFRHLLESIKSLKRNGWMTVASVSAVTITLTLVGVFMAVIMNATKLAQDIEGNVDVSVFVDIGTKDEEMKKLEKELNDLDHVKKVEFSSKEQELKKIQNEMGDSWKLFEGDNNPLYDVYVVSATDPSYTKQVAEEAADLKNVSRSDYGGASSDRIFQIAGAVRTWGLVAAALLLFVAMFLISNTIRITILSRQREIQIMRLVGAKNGYIRWPFFLEGGWIGLIGAILPILIITFGYAWFFQLINPSLLRSHYSLIHPQNIVWKINLLMVGIGVIIGSLGSIISMRRFLKF
288	AMQ97732.1	gpsA	glycerol-3-phosphate dehydrogenase	0.0216	37043	5.83	Cytoplasmic	341	MNYRVAVLGPGSWGTALAQVLAENGHDVRIWGHRASQVEEINTQHTNQRYLPDHYLPDSIQAFTNMEDAVKDADAVLFVIPTKAIRSVAKELVPKLNTKPVIIHASKGLEQGTHKRISDILLEEIPAEKRKAVVVLSGPSHAEEVAKHDITTITAASTDAKAAKYVQELFMNNYFRIYTNPDVIGVEMGAALKNIIAIGAGAIHGLGFGDNAKAAIMTRGLAEISRLGVAMGANPLTFIGLSGVGDLVVTCTSVHSRNWRAGNLLGQGQPLEEVLANMGMVVEGVNTTQAAMELAQIMEIEMPITQTIYEVLYEQKEIKTAAKEIMLRDGKKENEFSLTIF
289	AMQ96278.1	aad	bifunctional acetaldehyde-CoA/alcohol dehydrogenase	0.0214	94491	5.76	Cytoplasmic	865	MAKVIEKEKTKTIDVQAMIDDLAEKANAALKEMESFDQEKVDHIVHEMAMAALDQHMPLAKMAVEETGRGVYEDKAIKNMYASEYIWHNIKHDKTVGVINEDVQKGLIEIAEPVGVVCGVTPTTNPTSTTIFKSMIALKTRNPIVFAFHPSAQKSSAEAARVVRDAAIAAGAPENCIQWIEHPSIEATSMLMNHPGIAIVLATGGAGMVKSAYSTGKPALGVGPGNVPAYIEKTAKIKRAVNDLIVSKTFDNGMICASEQAVIVDKEIYAAVKAEFQAHQVYIVKPDELQKLEDAVMNEGKYAVNPSIVGHSAMEIAKLAGISVPKGTKMLIAELEGVGPDYPLSREKLSPVLAMIKANNTDHAFDLCEGMLNLGGLGHTAVIHSENEELHVKFGLRMK…
290	AMQ98431.1	AS238_00640	NADH dehydrogenase	0.0213	71912	7.01	Membrane	644	MAKQNIVVVGAGYAGVSATKYLAKKLKKEDVAITLIDRHSYHTMMTELHEVAGGRVEPEAIQYDLQHLFARQKNVQLVTDTVIGIDKERKIVKTKLGSYPFDQLILGMGGEPNDFGTPGVKAHGFTLWSFEDSVRIREHIEKTVAKAALEPDDELRKAMLTFVVCGSGFTGIEMIGELIDWKNRLAKDYKLDPNEITLMVVEAMPTILNMLDRNDAAKAERYLRKHNVELLLNAPIVEVAADHIKLKDGRNIPTHTLIWTAGVKGTSDAADFGLESARGQRLIANEYMQAKGYEDKNIYIIGDLVFYEEFPGTPTPQIVQAAEQTGHTAAANIVASIKGGEKHKFKGNYQGFMVSIGAKWGVANLFDKIHLSGFLAIVMKHIVNLKYFFDIRSGYYMFQ…
291	AMQ97323.1	AS238_02820	NGG1p interacting factor NIF3	0.0208	42117	5.25	Cytoplasmic	373	MTISGRTFIQKFESYCPQWLAEEGDPVGLHIGTLDKPIQRVMMTLDVRPEVVEEAIKKKIDLLIAKHPPIFRPVKRLVTDQPQEKMYADLLKHDIAVYAAHTNMDIIWDGLNDWFCELLGIEVESYLVKTHEIHYKKLAVYVPVDHAQKMREVLAAAGAGTQGDYTGTSFTSIGHGRFTPEAGAQPAIGKVGKTEQVQEAKVEVILPETIEKQVIQAMRSAHPYEEPAYDLFAIDEPVEMFGLGRVGELPQEISIEAFVEQVKEAFQLDGLRIVQPKNAKSSVKRIAICGGSGEKFYPQAIAQRADVYITGDIYYHTAHDMQSAGLIAIDPGHYIESLCKQRFIEKFESWKQEENWDINFFVSETNTNPFQFN
292	AMQ97979.1	AS238_08680	sugar ABC transporter ATP-binding protein	0.0206	65808	8.31	Cytoplasmic	587	MKVKKLSLQTLRRFIPYLTAYAKDIWLAVILGIINGIATVVMTLQIGQSIDQMIGEGQVRFNRLFHLLILFGGIVLINVVSQWLIQVLSNRLAYLSVAKLRKDAFAHLNRLPLRYYDQNSHGNIVSRFTNDMDNISIAISAAFNQLFSGVAIIILSFIFMMRLSPLLTLVVLCSTPIIFLVSWIVARASQTNFDRQQRIIGDISGFVTERIGNQKIVKAFQQEEASQQQFELLNADLYEKGQRAQFSSSLTNPSSRFVDHLAYLSIGLVGGLLALKSGSSITVGVISSFTIYSSQFSKPFIELSGITTQLQTAFSGLERAFDLIDQPEEKPDLPDAYALEPKNIKGKVSFDHVSFSYDPKQRLIEDFNFTAYPGQTIAIVGKTGAGKSTLVNLLMRFYD…
293	AMQ96427.1	macB	sulfate ABC transporter ATP-binding protein	0.0206	85416	5.4	Cytoplasmic	778	MLQLKDIKKYYKVGETTTKALDGVSVAFRQKEFVAILGPSGSGKTTMLNVIGGLDNYDSGDMVINGKSTKDFKDSDWDAYRNNSIGFIFQSYNLIGHLGIIENVELGMTLSGVSKDEKRKRAEDALHRVGLTNHMHKKPNQLSGGQMQRVAIARALANDPDILLCDEPTGALDTETSIQIMELIQELSKEKLVIMVTHNPELAHQYADRIIEFSDGKILTDSHPHIERPKDDQFNLRRTKMSFWTALKLSFNNIRTKKGRTFLTSFASSIGIIGIAIVLSLSSGFQKQIDNTQAETMAKFPITISKVTTNQTRDDAGLGASKADYPDSKTITAKVSEEDKAQHTNKIDQTYVDYVTDIDPNLSNNIGFTRTTGINLLRDVNGKVQPVSFSNQNPDTESL…
294	AMQ96622.1	AS238_12015	fumarate reductase	0.0206	53986	4.83	Cytoplasmic	504	MKKLVAGLLTAVALLAMSACGADQKNTAQTSSSTKESAEVSSGASEQVYTDPKEMKESYDVVIIGAGGAGMAAAIEAKDAGLNPVILEKMPVAGGNTSKSSSGMNASETKFQKEEGIKDSNDAFYEETLKGGGGTNDKEMLRYFVDHSADAVDWLDQNGIKLDNLTITGGMSEKRTHRPSDGSAIGGYLVEGLLNNVHEREIPIFVNADVTDIKKNGETVNEVTVHVQGEEPKEVTGKAIVVTTGGFGASKEFIEKYRPDLADYITTNQEGSTGDGITMIEKLGGQTVDMDKIQIHPTVQQDEGVLIGEVVRGEGAILVDQEGKRFVNEMDTRDKVSAAITALPEKSAYLIFDQGVRDRATAIEFYDQKGYVTTGKTMEELAEKIDLPKETLAKTVDGW…
295	AMQ97714.1	rpsU	30S ribosomal protein S21	0.0205	6954	11.29	Cytoplasmic	58	MSKTVVRKNESLDDALRRFKRSVSKAGTLQESRKREFYEKPSVRRKKKSEAARKRKKF
296	AMQ96951.1	rsuA	pseudouridine synthase	0.0205	26742	9.62	Cytoplasmic	238	MERLQKVIAHAGITSRRKAEEFILAGRVKVNGQVVRELGIKVGKHDTVEVDEVPIYQEEYGYYLLYKPKGVISAVADDKGRKVVTDLLPMVKERIYPVGRLDYDTSGILLLTNDGDFAQRLTHPKHEVDKVYVAKVKGIATKSMLAPLTKGIKIEGRKTSPAKFQILSVDPKTNHSIVELTIHEGRNHQVKNMLQAVGLPVQKLKREKYGDLTLQGLRPGDYRELNKKEVSSLLNHSK
297	AMQ98326.1	A5814_002601	hypothetical protein AX771_13340	0.0205	42554	6.94	Membrane	385	MQKRVITLLMIIVGASLGISFLPSAWQAIGQQSNGWLNNTFTNSLLGALIFFLLSLLLAKHISAIIKQVEQKLSEVSLTYLLFGAIGAIIGLTLGVVISTPLYNMEIPFVNSVLPILLMIILGYLGLRMGTTRIEEWKKVFGSRSKKIEQETASQVESQLLERKSGENFHKYKILDTSVIIDGRIYDITKTGFLEGTLMIPNFVLYELQYIADSGDSLKRVRGRRGLDILNALQKEEGISVEMYDGDFEDISEVDSKLIKLAKLLDGVIVTNDYNLNKVSEFQNVPVLNINALANAVKPVVIPGETMNVLVVKAGTERQQGVAYLDDGTMVVVEDGQHYMNERIEVVVTSALQTAAGRMIFAKPAHAGRGIDNKKETEKKTKQSK
298	AMQ98449.1	yidC	hypothetical protein AX771_14135	0.0202	30926	10	Membrane	272	MKKYKRLLLMAGIVSLVIVLSGCGTGEVSAQSTGIWDRYIVYYFAEAIKALSFGNAGIGIILFTLIIRVILLPLMHFQTKSMRKTQELQPKLKALQQQYSSRDPETQSKLREEQQRLYAENGVNPYAGCLPLLVQMPILMALWQSISRVPELKQGHFLWLNLGNADPTFILPILAAIFTFASTYLSSMSQIESNASMKIMNFVMPVMILVMGVNLASGLSLYWVVSNAFQVVQTLLINNPFKIRKEREEEARRIRERERALKKAMNPKKKRK
299	AMQ97763.1	murA	UDP-N-acetylglucosamine 1-carboxyvinyltransferase	0.0202	46983	5.17	Cytoplasmic	433	MEEIIVRGGNQLNGTVRIEGAKNAVLPILAASLLAEEGITTLDNVPILSDVFTMNQVIRHLNVDVDFDEQKNQVTIDASRQLEIEAPYEYVSQMRASIVVMGPLLARNGHAKVAMPGGCAIGKRPIDLHLKGFQALGAKIIQKNGYIEAIADELIGNTIYLDFPSVGATQNIMMAAVKAKGTTIIENVAREPEIVDLANILNKMGAQVYGAGTETMCIEGVDHLHAVNHSIVQDRIEAGTFMVAAAMTQGNVLIADAISEHNRPLISKLIEMGAEIIEEEGGVRVIGPKHILPTDVKTMPHPGFPTDMQAQMTAIQLVAEGTSVVTETVFENRFQHLEEMRRMNAHVKIDGNVAIMDGNHELQGAEVYATDLRAAAALVLAGLKANGITRVRNLNYLDR…
300	AMQ96162.1	rpsN	30S ribosomal protein S14	0.02	7159	10.47	Cytoplasmic	61	MAKKSMIAKNKRPAKFSTQAYTRCERCGRPHSVYRKFHLCRICFRELAYKGQIPGVKKASW
301	AMQ97024.1	yuaG	flotillin	0.02	55118	5.12	Membrane	499	MEIPVVFIAIAIAALILLMLLIVFVAKYQTAKPDEALIISGSYLGSKNVHIDESNNKIKIVRGGGAFVLPVFQRSNRISLLSSKLDVSTPEVYTEQGVPVMCDGTSIIKIGSSVEEIATAAEQFLGKTREELENEAREVLEGHLRSILGSMTVEEIYQNRDKFSQSVQEVASVDLAKMGLIIVSFTIKEVRDKNGYLDSLGKPRIAQVKRDADIAEAEALKETRIKKAQAEKESQAAELQRQTEIAESLKEKELKLATYKQEQDVAKAKADQAYNLESARAQQQVIEQEMQIKIVERQKQIELEEKEITRREKQYDSEVKKKADADRYAKEQEAQAQKVKEVTEAEAERFRVEALAEAEANKTRLAGQAEAEAALAKGKAEAEAKQKIANAFKEYGEAA…
302	AMQ96689.1	manY	PTS mannose/fructose/sorbose transporter subunit IIC	0.02	27238	4.58	Membrane	267	MSIISIILVVLVAFLAGMEGILDEFQFHQPLVACTLIGLVTGNLEAGIVLGGTLQMIALGWANIGAAVAPDAALASVASAIILVLGGQGVKGVPSAIAIAVPLAVAGLFLTMIVRTIAVPIVHLMDAAAEEGNIRKVEMWHIIAVCLQGVRIAVPAAALLFIPAQTVQSFLESMPAWLTDGMAIGGGMVVAVGYALVINMMATKEVWPFFVIGFVVAAISQLTLIALGALGVALALIYLNLSKMGGSSNNGGGSNSGDPLGDILNDY
303	AMQ96607.1	AS238_07605	hypothetical protein AX771_02955	0.0198	19200	6.11	Membrane	169	MKKMMFGVAALIVIGITGMTGLLNAAFHMDDISDQEYRISLKKAAAIVKNETKEHNISAIHFAVEKDLENPTNATYEYQFFCEGQVIAVNPSTGKTTVRNDTEKAAEHLFDIEKTEEFKQPQAAMKEAVSYYGKKAKVKEWTLLVKDERPYYKVRLIDGEQDRQVWISA
304	AMQ96512.1	graS	histidine kinase	0.0198	39343	5.95	Membrane	341	MNFFKYLKDQWTLILGWLFFIALTIFVMWLAPNIKVDLSTIAYLALIEGVFLIFYLLGGYLSKRRWWGKLADIQKTSPLQNYLSGGRTEEEKLVEEYINQLIREHQEVMQSAISNQQDQKDYIDSWVHEIKVPLSASKLLVRSIEFDIDDQKYTLLENELSKIDEYVEQVLYYARLDSFSRDYLIQEYGLKGIIQPVIRSQANYFIQKNIRYEIVGEDHTVLTDAKWIAFIFNQLLSNAIKYTPDHGNIIVSIEKEAQGVSLSVKDSGIGIPAEDLKRIFDKGFTGRNGRLSKTHSTGLGLYLAKNLAEKLGIHLTAESTEGKGTTMTLFFPILNFYNEKR
305	AMQ98001.1	glnQ	polar amino acid ABC transporter ATP-binding protein	0.0198	23357	5.7	Cytoplasmic	211	MIELKKVNKAFGEKKIIKDLNLIIPDGKTLAIVGPSGGGKTTLLRILAGLESSDSGEFYLDGVPFNPFELKMKEQVVGVVFQDFQLFPHLNIFENITLAPKMVLKQTKEEYTKKAEELAASLGISDLLNIYPYQLSGGQKQRVAIARALAMNPRVLAYDEPTSALDPELRQQVERLILSLKEDGVTQIIVTHDLVFAENVGDQLLKVSPIH
306	AMQ96398.1	ybjQ	hypothetical protein AX771_01715	0.0198	11201	5.11	Cytoplasmic	106	MITTTTNSVEGKAVVAYKGIVFGEVITGIHAFKDLEAGLRNIFGGRSKSYENELMGAREEALAEMAERAKALGADAIIGVKMDYEVLGSDNGMLMVTCSGTAVSTR
307	AMQ96736.1	rha	antirepressor	0.0197	27365	7.79	Cytoplasmic	232	MQELVILKNKEAVTTSLQVAESFEKKHQHVLRDIDALKKDVSNFGQMFVEGNEPDSYGRNRRVFFISRDGFFLLAMGFTGKKAIYFKQKYIEAFNEMEDVIRKNTVPQTIEDMMIYQLEEMKDVKKDVSMLKDTMRISGQQEFEIKQKGNMKVMGVLGGKESRAYEEISKKVFSKFWSEFKRTFSIPRYGELPRKRFDDAVSFIEMWLPETAIRMEIDQLNRQQRLFGDDNE
308	AMQ98208.1	ecsA	multidrug ABC transporter ATP-binding protein	0.0197	27511	5.25	Cytoplasmic	245	MSLIIDHVTGGYGHLPVLKDISFDVQPGEIVGLIGLNGAGKSTTIKHIIGLLEASKGTIEINHLSLKKNTEEYRKQIGYIPETPSLYEELTLREHIEVTAMAYDIPMDIAMKRAEKLLETFRLSNRLDWFPANFSKGMKQKVMILCAFLIEPSLYIIDEPFLGLDPLAINALLELMVEMKKEGAGILMSTHILATAEKYCDRFVVLHNGEIRADGSLEMLRKEFQLPDSSLDEIYIALTKEQAHE
309	AMQ97770.1	atpE	ATP synthase F0F1 subunit C	0.0192	7295	5.96	Membrane	71	MNYIAAAIAIMGAAIGAGYGNGQVISKTIESMARQPEMSGQFRTTMFIGVALVEAVPILGVVVALILVFGV
310	AMQ97325.1	AS238_02810	hypothetical protein AX771_07255	0.0192	15508	4.26	Membrane	146	MRAIFSSISVVGLFFLLAGCGSADSNTGSVDSIDAGQTVKTSSTKTERQSIFVGTIESITQVEAEEETLQLKLVDVMAKEDPANMGTSFSNDGVILNATAEKISVDINELKIGDKVQFTLVEMPIMTMSIPPQVPGDSIIDVSLNK
311	AMQ98098.1	EfmE980_0690	hypothetical protein AX771_11870	0.019	11516	10	Cytoplasmic	100	MNKKAAMQRIIELTYSEDWQNDKEAASEVMRLGRAMWADKSNKPRPRKIAIWHGDKLLVTGTAEQLASLTGLHEKIVRKRARCGYTDVKKRTFRYVEGSS
312	AMQ98213.1	AS238_15165	hypothetical protein AX771_12515	0.019	106954	5.74	Membrane	906	MKILRIEIAAFGKWRQKSFDFYSGNQLIYGGNEAGKSTIYQFIQAILFGFPSKGRKKKDYTPKDGSAYGGKIWLKHPVYGEFAVERYKQQNRGKSKVWLGDQVGSDELLEKLIAPLTKELFQQVFTFQQEQLMELDHLREKELHDALISLGITGSSQVFQKRQEYYQKAQQLFKKKGQKLLINQKLNEWKELQEKIHQKQEQEAYFGKLIQQEQEYESQQQQLLAQLKEANKQFSLARQQELNFSLYEEWQSLKKNSTTGLPDEQLLLDLESFSKRYQQTNERLEELEATLEKHSGMDQQSARYYFYLEQEQELKDLQQLQFTAEQLNEEWQRLQIETRETNSELKILEQRWHWQKNPLPEEFLYEEEWKHLLAEERRIADLESQISVRLQIAKEQQEM…
313	AMQ97141.1	gpsB	cell division protein DivIVA	0.0189	15792	5.09	Cytoplasmic	139	MANLVYSPKDILQQEFKTKMRGYDPVEVDEFLDNIIKDYETYSKELLALQEENDRLSAKVAQLSKTQGAAQTRVQQTEAPKSAAVTNFDILKRLSNLEREVFGKKLDQQASAVKPAQPNPNNYTNADTSLDDNEKTRQF
314	AMQ96750.1	arpU	autolysin	0.0187	15883	9.3	Cytoplasmic	137	MQLLREVDFKQTRCNARDVLKNFRRLERMAGRSLIDIKSPIITDMPKAPKHGNKAEDAIIQMMDIETERDAILAALMALSLISRQILYYSFCVPDSFSNYRISREVGYSERSIQRMKSEALIEFAEAYKHGKIIAYK
315	AMQ98153.1	AS238_09285	hypothetical protein AX771_12180	0.0187	24168	7.71	Membrane	214	MLLKTLVYKKKDLTTVTETSTLEEALKILETSGYRCVPILDSSGNIFRGNIYKMHIYRHKANGGDMTLPVTHLLKNATKFIYLDTSFFKVFFTIKELPYIAVLDSENHFYGILTHSTLLNMLSQSWSVEQGSYVLTIASTGKQGDLAAIAKIISKHSSIASCITLDIEKDEYIRRTLITLPANTEAKVCETIVNHLEKKNYKVVEIENLQNQEA
316	AMQ97006.1	AS238_12560	proline/glycine betaine ABC transporter ATP-binding protein	0.0187	36716	5.38	Cytoplasmic	321	MTKLIEFKHVQKKYDGKYVIDDLNLAIKKGEIFVLVGPSGSGKTTTLKMINGLSKPSAGDIYFKGKSLNEYNLQKMRWNMGYVLQQIALFPTMTVKQNIEVIPEMLGWEKQKRADRVDELLQKVGLSPDIYRDRMPRELSGGEQQRIGIIRAIAASPDVILMDEPFSALDPISRNSLQELVLSLHEELGTTIVFVTHNMEEAIKLGDRIAFMKDGEIIQCDTPEQLLMNPKNDYVRHFFDEPKQTKEWRVEDLVVNGYFLNEIPENARQQVCFDTPMKEVYSLLSVYPSIVIVEKQRSIGSLTSKEIFAFLSREEEGNENI
317	AMQ97009.1	AS238_12545	ABC transporter substrate-binding protein	0.0187	36990	4.88	Membrane	330	MKKLWLLLPLLLLLSACGTAKETSSKQEIKDLKKVTLVLDYVPNTNHTGIYLAKEKGYYKEAGLNVQIIEPGDNSTSIGLVGADKAQFGVSYQEDVTYAHADGQNIPVKAIATVIKHNTSGFATLSDSNIHSPKDFEGKTYAGWQSPSEEAVLKAVMEKDGGDFSKLTMVGSNGEGPESLGKSSDIQWYFEGWDMIKAKEAGIELNYIPLKELDERLDYYTPVIITNDQLIKSDPELVQSFMDATKKGYQEAIKDPNDSAKLLQKYAKENDRTFLEESQAFLSKNYTDDPENWGLMEEKVWRNYTAFMQENGLIKQDVPSQELFTNQFIK
318	AMQ98484.1	AWT83_14995	2-C-methyl-D-erythritol 4-phosphate cytidylyltransferase	0.0184	33033	7	Cytoplasmic	284	MKKIQQITLKMSQEIVDFCLKNQLLCYFCGGGAIGTVREQGFIPWDDDLDFFMPREDYEKFYQLWVNSEKSKKYPIQKASKNYNDHNSFTTIRDADTTFIKTYQRDLDIVHGITIDIFPLDVAPVSKFSRKIQKLWALVYALFCSQVVPEKHGGIMATGSKILLSIFRSPRTRYKIWSFAEKQMTKYNNEPTGYVTELCVGPKYMGNVYPAKDFESAVWVPFEDTEMPVPVGYDNYLSQVFGDYMQLPPEKDQVSHHEAVYIDPEHPYTMYKGKYYLTKGAEKK
319	AMQ98585.1	ybbL	ABC transporter (plasmid)	0.0184	24554	5.46	Membrane	217	MSDSLFQLEKVGFQANGNQILQDISFTVNKGEVIVFSGPSGSGKSTLLKLIGTLLSPTSGKIYYRGTDLQKIDPVEYRKEVSYFFQNASLFDETVQENLSFPARIREEGFDRERAKKLLERVQIPETYLSKEVKELSGGEKQRVALVRNLMYQPKVLLLDEVTSSLDQENRAIVLDLVRDMMKDQQTTVLAVTHNQEEIDQASRLITIKGGKMEESK
320	AMQ96599.1	AS238_13005	ABC transporter ATP-binding protein	0.0184	32930	5.21	Cytoplasmic	301	MKSLSVQELSKNFGHKQALSDVSFSLSPGKIVGLVGPNGAGKTTIMKAILGLIHYSDGTICIGENEISPSSHKGLEQVGALIEYPGIYPFLTGYDHLKLFSETNDVSAIDTIVNQLKMEKYIHKKAKSYSLGMKQKLGIALALLNHPSIVILDEPMNGLDPQATRDVRKIITDLATQGTSFLISSHLLSELEKMVDELILINQGKIIKQCTMAELNQTAQDFIVISTTNDLAARTILTEAGYTLEDPDKIKLLKENEELLGTVIQLLSAQNIHVTDVQHLTNDLESSLLEILDSVKGEEEK
321	AMQ97736.1	AS238_07685	PspC family transcriptional regulator	0.0181	12021	9.33	Cytoplasmic	105	MKKKLTKSNKNVVLTGTLAGIGEYIGIDPTVIRVLYVFLSLVAFGSPIILYILLALIIPSARSARTNYGHNNAYYEKNNYREQTREQTKKRKEAEKIDDDEWSDF
322	AMQ97122.1	AS238_08470	hypothetical protein AX771_06080	0.0181	16329	7.88	Membrane	144	MKKQSNVILGFVLVLIIVLFAVLNNKNVPVSFGFTSFSAPLILVIIGSALIGALIVFLTASATLWQQKKQIKQLTQEMSEYQTELQKKIEEAKEEQQREFRNERAELEAAYQAELQAKTAQISQLKAPEEQKTQSPKQSFNYFD
323	AMQ97814.1	cvpA	colicin V production protein CvpA	0.0179	20730	6.96	Membrane	182	MLSLLILFLLLIAFFSGARRGFALQIIFAIGYVLSFIAAQHFYKPLASHLELYIPYPAVTPTSKLAFFDQVFAFHLDEAFYAGTAFLIILLIGWLLTRFVGVFVHGLTYVPILRQVDWIAGGILSLIMAYVTIFLILQLLAFVPLDVVQNQFGEHSFARFIVERTPFLTNKMYELWVTNILN
324	AMQ96183.1	dhaK	hypothetical protein AX771_00455	0.0176	60347	4.47	Cytoplasmic	560	MSVTEISASQFQEMVQAGANRLQVNAEYVNSLNVFPVPDGDTGTNMNLSMTSGAKAVVDSTSEKVGELAAMLSKGLLMGARGNSGVILSQLFRGFSKQIPDVVSLNASDLAAAFTHGVETAYKAVMKPVEGTILTVAREAAKAGEKKAKSTDDVVEVMTAVVKGAKRALAKTPDLLPVLKEVGVVDSGGQGLLFVYEGFLSALNGEFQADETYEPSPAEMDDMVNAEHHRSVQGQMATEDIHFGYCTEIMVKIGEGPTVDSTFDYEEFRNYLDGIGDSLLVVNDDEIIKVHVHTENPGEVLNYGQKFGSLVKIKVDNMRLQHETILEHDEEVNEFAKKEIPRIPYGIVAIAAGKGVQELFESLGANYVISGGQTMNPSTEDIVKAIQEVNADKVIVLPN…
325	AMQ97221.1	AS238_03435	hypothetical protein AX771_06635	0.0174	7828	9.34	Cytoplasmic	63	MKKRQKKKNAYKHYIRSIFTGYERMLEDPELEQLTFTYLNEETQLTRDEHQRIHFTTRDLPSK
326	AMQ96276.1	tgt	tRNA-guanine(34) transglycosylase	0.0174	43275	6.39	Cytoplasmic	381	MTQPAIRYRLIKKEKHTGARLGELITPHGTFPTPMFMPVGTLATVKTMSPEELKEMGAGVILSNTYHLWLRPGEDLVEEAGGLHKFMNWDQPILTDSGGFQVFSLSDMRNIEEEGVHFKNHLNGSRMFLSPEKAINIQNKLGSDIMMSFDECPPFDESYDYVKKSVERTSRWAERGLKAHANPDRQGLFGIIQGAGFEDLRRQSAKDLVGMDFPGYSIGGLSVGEPKSEMNRVLEFTTPLIPENKPRYLMGVGAADSLIDGVIRGVDMFDCVLPTRIARNGTCMTSQGRLVVKNAKYAHDFRPIDEKCDCYTCKNYTRAYIRHLIKCDETFGIRLTSYHNLYFLLNLMKQVRQAIMDDNLLEFREAFFEEYGFNKENAKSF
327	AMQ97751.1	hpf	Fis family transcriptional regulator	0.0174	21095	5.1	Cytoplasmic	183	MFRYNVRGENIEVTEAIRDYVEKKVGKLERYFSDAPDATAHVNLKVYTEKTAKVEVTIPLPYLVLRAEETSPDLYASIDLVVDKLERQIRKFKTKINRKSRETGMNTADAAALFNEEDENENDSELDIVRTKRLSLKPMDSEEAVLQMNMLGHNFFIFEDAETNGTSIVYRRKDGKYGLIETD
328	AMQ96839.1	AS238_03650	MarR family transcriptional regulator	0.0173	16866	7.93	Cytoplasmic	146	MEPDLKTVNDYLVSVFNDILTIEESELKKSQFKDLSITEMHTIEAIGMYKKKTTSEVAKELSITVGTLTTAINKLVKKGYVERIRSEDDRRVVKLGLTKKGKLLFRVHQHFHREMVKNILDGMATEEQHALLDALKNLHDFLQDYK
329	AMQ96738.1	AS238_14005	hypothetical protein AX771_03755	0.0173	25713	6.97	Cytoplasmic	223	MSEIKGTTNFEKLFSRKLNKILKKKGNFDYLSWAHAWEIMKKNDPQATVTINEYKHYRVVSGTHQDFLVEEYKPFLMDETGTYVSVSVTVKGHTETELFPVLDYRNQPVVKPNAMQINNSLKRCFVKALALHGLGLYVFQGEDIPTPPRIDTKKLNMLETILEAFNEQMGKDMTKTLIEYVNEQTDKLGLLADNVETIEQLSYEQCALMERAIAAKRKELDKK
330	AMQ97529.1	AWT83_10515	hypothetical protein AX771_08455	0.0173	12453	4.92	Cytoplasmic	109	MNKKIQNLIKKLAHECANDDLGMSVSVVDEKGEVALAQAGNDGLVALSVYQQYEKTKYDLRKNNCNCETHSALRCMFDIDEEDAEFEEWCQEFLSFAEKMDRKKGGIKF
331	AMQ97367.1	gatA	aspartyl/glutamyl-tRNA amidotransferase subunit A	0.0171	52875	4.95	Cytoplasmic	490	MTELHNRSLEELHHMLVSKEITVQDLTKTTFERIKETEPEVEAFITLNEEKALEQAKALDEKGIDESNVLAGIPIGIKDNIVTKDILTTAASKILYNFEPIYDATVMDKIYQADMIPVGKLNMDEFAMGGSTETSYFKKTKNAWDPTKVPGGSSGGSAAAVAAGQIPVSLGSDTGGSIRQPAAFNGIVGMKPTYGRVSRFGLIAFASSLDQIGPMTRTVKDNALALTAISGYDEKDGTSSGVSVPDFAEGLTGDIKGMKIALPKEYLGEGVAPGVKEAVLKAAETFRSLGAVVEEVSLPHSKYGVAVYYIIASSEASSNLQRFDGIRYGYRSENVKSLDDVYVNSRSEGFGEEVKRRIMLGTFSLSAGYYDAYFKKAGQVRTLIKRDFEKVFADYDLII…
332	AMQ97679.1	yidC	OxaA precursor	0.017	34963	9.86	Membrane	316	MNKWKNWLLGSGLVSILLFLSGCVRMDSNGNPDTSGIVYRVLVHPMGQAITYLVENFNWSYGWAVIAMTVIVRIIILPLGISQSKKTMIQSEKMQALKPQVEAAQQKLKAATTREEQMAAQAEMQQVYRENGLSMTGGIGCLPLLIQMPIFSALYFTARYTEGIRESSFYSIDLGSPSMVLVVIAGVAYLLQGYISTIGIPEEQKKTMRTMLIVSPAMIVFMSISAPAGVTLYWVVGGVFSCLQTFITNVMMKPRLKAQVAEELKQNPPKQVVTPRKDVTESAKPANNKQATKQIKQPKNSTNNKGRNAGKQQKRK
333	AMQ98440.1	guaB	IMP dehydrogenase	0.017	52980	6.05	Cytoplasmic	494	MSNWETKFTKKGFTFDDVLLIPAESHVLPNEVDMSVQLAKNIKLNIPIISASMDTVTDSKMAIAMARQGGLGVIHKNMTISQQADEVRKVKRSESGVIIDPFFLTPQHLVADAEELMSKYRISGVPIVETLENRKLVGIITNRDMRFVTDYHMPIADVMTKDNLVTAPVGTSLKDAEKILQKHKIEKLPIVDNEGRLSGLITIKDIEKVIEFPNAAKDEHGRLLVAAAVGVTSDTFERANALLEAGADAIIIDTAHGHSAGVIRKIQEIRSTFADATLIAGNVATAEATKALYDAGVDVVKVGIGPGSICTTRVVAGVGVPQLTAIYDAASVARQYGKAIIADGGIKYSGDIVKALAAGGHAVMLGSMLAGTDESPGEFEIFQGRRFKTYRGMGSLGAM…
334	AMQ97346.1	AWT83_11410	hypothetical protein AX771_07365	0.0168	26257	9.4	Cytoplasmic	223	MNFLVVLKDTLIERSTFLYVQLQENKTLLHFSPEFHLEGLTLGEIYQAEGLSAVLHFFKVELELPVKDYIELSLESWDRAVVELFPEGLMIDTNDGKIHLTAAELQKQMRYQIDDENSFSIFRRQQKILKSFLKVISKKRNLIKTTQLLKKYPGLLHTSIQFPQLITMIHRFIRMQQLPSKKLFLPLTDTFRVVNREDKKKVIVIDFTRNRNVLHQVAMEKAN
335	AMQ97661.1	yccF	hypothetical protein AX771_09260	0.0168	12708	8.86	Membrane	119	MSCLGNVIWFIFGGLIGGLSWLAAGILWCITIIGIPIGMQCFKIASLSFAPFGKEVIYHQSGMSLIVNIIWLIVSGLPIALAHVVSGILLCITIIGIPFAKQSFKLARLALMPFGAEIV
336	AMQ96975.1	AS238_14640	EDD domain protein	0.0166	31039	5.77	Cytoplasmic	280	MTNVKIVTDSSCTMEKNVRDALGIRVMPLSIMIDGTVYPDDDQLDGERFMEMMAKAKNLPKTSQPPIGEFISMYDELGEDGSEVISIHMTKGLSGTVEAARQASNLTKTKVTVIDSDTTDQGLSFQVIRAAELAKEGKTVEKILEEVKKVQDNTKLYIGISTLDNLVKGGRISRTTGLLSSVLNIRVVMNFAHSELIPVTKGRGKKTFDKWFNNLKNELKELPNVRQIGISHADAKELAQEFKEGLQELFPDMHIPVLHTNPVIATHTGKDAFAIMYYVD
337	AMQ96187.1	AS238_05835	peptide ABC transporter permease	0.0165	35780	9.66	Membrane	320	MWKTILRRVLLMIPQVIILSVLIFLLAQAMPGDPFTGLINPNQDPAVIEQMRQAAGLNDPWYVQYFRWIGNALQGDFGQSFLYKRSVADLIGERIINTLYLSILTVVLTYLIAVPLGMLAGRYQNSILDKIVVIYNFFSFAVPLFIFGLIMLFVFGYRLGWFPTSGSQTLGLQGGFITQWIDRLKYILLPSITQAFLATAVTIQYLRSEVIDSKSLDFVRTARSKGVPTNKVFSRHIFRNAALPMASQMGYEITSLIAGSVVIEKIFGYPGVGKLFIDSIGQRDYTVITSLVLILGIATLVGTLLSDIIMSIVDPRIRIQ
338	AMQ97054.1	guaC	guanosine monophosphate reductase	0.0163	35948	7.66	Cytoplasmic	325	MKVFDYEDIQLIPNKCIVNSRSECDTTVTLGKHTFKMPVVPANMQTIIDETIAEFLAENGYFYIMHRFDEAARIPFIKKMKKRGLITSISVGVKKEEYSFIEKLAEESLNPDYITIDIAHGHANSVIDMIQHIKKYLPETFVIAGNVGTPEAVRELENAGADATKVGIGPGKVCITKIKTGFGTGGWQLAALRWCAKAARKPIIADGGIRTHGDIAKSVRFGATMVMIGSLFAGHEESPGETKVENGIVYKEYFGSASEFQKGEKRNVEGKKIWIQHKGSLKDTLVEMQQDLQSSISYAGGRDLEAIRKVDYVIVKNSIFNGDTI
339	AMQ96659.1	AS238_06470	virion core protein	0.0163	45390	5.11	Extracellular	415	MGLIKAATSMVGGGLADQWLEVIEPDNMSDTTVMTKGVKVRKDDKRGSNRKGTEDVLTDGTVVHVYPNMMMLLVDGGKIIDYTAEEGYYTIKNDAAPSMFNGTLKEAIAETFDRFKFGGVTPQKQQVFYINLQEIKGIKFGTSAPLNYFDNFYNAELFLRAHGTYSIHVVDPILFYTNAIPKNKTQVEINDINEQYLAEFLTALQSAINQMSADGQRISYVPSKSLELSKYMDTALDDSWRELRGMEIVSVAVASISYTDDSVKLINMRNEGAMLGDPSVREGYVQGSIARGMEAAGKNEAGAMTGFMGVGMGMNANGSYLSQAAQNNQEQIKQQAEKQNQQTAQGNADTWTCPVCGTENSGKFCSNCGAAKPVENVQPKLQMRCSECNEIVDLSNGIP…
340	AMQ97522.1	CUS02_09640	hypothetical protein AX771_08415	0.016	17898	9.67	Cytoplasmic	151	MATRSKYGNKKHEVDGITFDSKAEARYYMKLKRNGMSFMPLSETYCAMQENVLLQEGYLCNDRKIAPIYYRADFVIYENGQVKKVIDVKGYQDAISMLKMKMFAHRYGFPVTFAKFDSKINKFIEMDCFESARQQRKRQTERRKKKLMEGK
341	AMQ98290.1	rsmB	16S rRNA methyltransferase	0.016	50637	6.88	Cytoplasmic	452	MKKIPKKMKKSVRYMALLTLERVNKGGAYSNLLLNEMIKQSELNQKDVGLFTELIYGTISHQRLLEFYVAPLIAKAKKVDDWVKTLLYLSVYQLEFLDKVPAHAILNEAVEIAKVKGNPGTGKFVNGVLRNYQRQGAPDLQGIADPIERLSVKISLPLWMTKRLVDQIGYEETEKLGLSLYQPSHASARVDTRRLSRDQAITVLQEEEITAEKSQVSPYGIVAKKGHLASSSLFHDGVMTIQDESSMLVAPSMQIEPEHHVLDACAAPGGKTTHIASFLDPSCGGEVVALDVHEHKVKLIEDNAARLGVSSAVYAQKMDAREVSKQFEAEQFDRILVDAPCSGLGLLRRKPDIRYKKQPDELANLPKIQLEILESCAPTLKSSGILTYSTCTILKEENQ…
342	AMQ96522.1	prsA	ribose-phosphate pyrophosphokinase	0.016	36768	5.64	Cytoplasmic	333	MSNKYQDDTLKIFSLNGNRPLAEKIAKVFGTELGKSVVKQFSDGEISINIEESIRGDHVYIVQSTNAPVNDYYMELLIMIDAMKRASAKTINVVLPYYGYARQDRTAKPHEPITAKLIANLIEEAGATRVLTLDLHTVQVQGFFDIPVDNLFTMPLFAHYYRQLGLTGDDIVVVSPKNSGVQRARSLSEYLNSTLAIVDHADDASTEGGYVIGDVQGKTCIMVDDILNTGATLARAANVLKENGAKEVYACASHGLLSDHAKSILDNAPIKDICITDSVFTEENRHPENLTIVTCSELMGEAVKRIHENTPMSPLFRLEEKNSNKQKKEGKKL
343	AMQ97382.1	sppA	signal peptidase	0.016	36796	4.63	Membrane	341	MNKRRWAAVLIAAGLFVVSLVSASLTKPQENDQIEGLNSWLYGDEELAPNVLEEGDSTQKIVKLSVDGTIAAGGSSGLFASEGYNHKNFMEQLKAIEEDPTVKGIFLEVNSPGGGVYESAEIAKKLDTIRKEHDIPMYVSMKNMAASGGYYISAQADKIFATEETVTGSIGVIMSGLNYSGLLEKLGVEDTTVKSGALKDMGSGTRPETKEEEAVLQAYIDSAYSRFVAIVSEGRNKSEEEVKKIADGRIYDGVQAKEVGLVDELGFPEDALKAIRKEQQLEDAELVEYSSTPSGFASTWLGSKLAEFQGLKPSETSQILSVLENLGTAESPKAMYYYGGE
344	AMQ97549.1	AS238_14595	hypothetical protein AX771_08585	0.0158	46251	8.64	Cytoplasmic	417	MEKLYDVIVVGAGTSGMMAAISAAEQGARVLLIEKNKKAGKKLLMTGGGRCNVTNNRPVDDLIAHIPGNGKFLYSTFAQWNNFDIMNFFESQGVHLKEEDHGRMFPVTNKSKTIIEALLNRLKELDVTLLFSTRVEKLIHKEHKIYGIRTEFEEFHAPAIILTTGGRTYPSTGSTGDGYKIVKRVGHTVTPLYATESPLISDEPYIQEKTLQGLSLQDITLRVLNKKGRVLTEHTMDLLFTHFGISGPAALRCSSFVNKELEKTGEPVTLSLDCFPTQTKQELIHILTEKSKATKKNLVNAWHGILPERLLVFFLERLEMDHLTGQQASQKQIQDFVQLCKEFKLSINKTFPIEKSFVTGGGVSLKEIYPKTLESKIIDGLYFAGELLDVNGYTGGFNI…
345	AMQ96943.1	sigA	RNA polymerase subunit sigma	0.0157	41855	5.23	Cytoplasmic	369	MANGTDKKTYEAAVAAFIKENKPKRQVVYDDLSNQLATPFTLNADEMDKLIQKIEDAGISVVDENGDPSIHSLKSAEKKAEQAKTEDLSAPTGVKINDPVRMYLKEIGRVSLLTAEEEVALALKIEEGDQEAKQRLAEANLRLVVSIAKRYVGRGMQFLDLIQEGNMGLMKAVEKFDYRKGFKFSTYATWWIRQAITRAIADQARTIRIPVHMVETINKLIRIQRQLLQDLGREPTPEEIGAEMDLPTEKVREILKIAQEPVSLETPIGEEDDSHLGDFIEDQEATSPAEHAAYELLKEQLEDVLDTLTDREENVLRLRFGLDDGRTRTLEEVGKVFGVTRERIRQIEAKALRKLRHPSRSKQLKDFLE
346	AMQ96264.1	HMPREF1359_01778	phage infection protein	0.0157	98970	4.78	Membrane	901	MQSIKNTLRLYLLDWKRIFKNPIATLLIIAIMIIPSLYAWFNIKALWDPYGNTGELPIAVYSADKPAEFQGKEVAIGEQVIESLHKNKQLGWQFVDSKEQLEDGVRSGKYYAGIYLPKDFSEDLLSFTSGDIKKPKIEYTVNEKINAIAPKITDKGASSIQSQITNEFIKTASSTLLKVFNEIGYDIDTNLVSINKVKDMILSTDENLDTIDGYTKQVLELQSQLPEIKEKLNKANEFVDYIPKVDEMGEKVVALNDKMPELKDQAKIILDLQEKIPEIQNAGKQLAEIDGDFASIQETMNQGIDEAKQGLTIIQQVQDILPDVKNLENQASDLANQTKSGASQLKDAIPSITNSVDVTLKSIGQVATTTGSLIDTVRTAIEVGKLTDDEKKNISNVLN…
347	AMQ96478.1	AS238_06850	peptidoglycan-binding protein LysM	0.0157	32392	4.77	Membrane	298	MYDENEWGENVRMTRRRQQKQAARKRMIMIGAAVAVFLIIAGGVAGLYFHGKNSSEAKSTTITETTTKKTETKQTSESSTKTKETQTSEEKTANGLPEQLQAIVNDYSKKIEEKTPALIEEYQTEIQGNQEGIAGLSAVANQKARELQAISDEGIRKLRAAYQAAENKDGVDLDTLINQLSANYTNHVAKISDIYLQTSASLQAESTSTQDTTSSDSETAESVEASEMQARTTQDTTDSSETNTNSATSQAATTVVLEGEGPNQIAERTGVPVETILSLNGMSMENYFLTPGETLKLN
348	AMQ98639.1	HMPREF1359_00233	hypothetical protein AX771_14715 (plasmid)	0.0157	79839	4.66	Cytoplasmic	684	MYFTIAGNTKTDKELIKKATKEVGKRTSFLPKTIKYSVIETEEQLHVLGKVLEHEGRSSVKLTLTLHDTEGKIEKAGTEYVFGPLDYQISEGFYSTLMDLIRLDVFKETDETMSVEESYRNEKLLQVLEEELESDQRKVNQGSEVEVNEEVPWERPIFPKKESKEKETVYVDEQADIPTQKSIFEEENDVMGQLEVDPFEETMEDEETAEVEVDPVEANEESTWTEGDSQEYIEPLISEEVEKNEIEIQKATVFDYILDQYPPEHEWMKEKNKLFLNELYSKYQLPQTYQAFLESKEELISQGKGTLLEQLESVQSTNWHELAQEDLLATFEERQQETDQEINEYATEQSSNWEKAKEELNKEEQRVIEEEVQKIKERYEKKRDNAYSLCVEKINNFTQ…
349	AMQ97407.1	dnaK	molecular chaperone DnaK	0.0157	65644	4.6	Cytoplasmic	609	MSKIIGIDLGTTNSAVAVLEGNEAKIIANPEGNRTTPSVVSFKNGEIQVGEVAKRQAVTNPNTISSIKRHIGEAGYKVDVEGKSYTPQEISAMILQYIKGFAEDYLGEKVEKAVITVPAYFNDAQRQATKDAGKIAGLEVERIVNEPTAAALAYGLDKTDRDEKILVFDLGGGTFDVSILELGDGVFDVLSTAGDNHLGGDDFDNKIIDYMVAEFKKENSIDLSQDKMALQRLKDAAEKAKKDLSGVSSTQISLPFITAGESGPLHLEMTLTRAKFDELTADLVERTKVPVRQALKDAGLSQSEIDEVILVGGSTRIPAVVEAVRKETGKEPNKSVNPDEVVAMGAAIQGGVITGDVKDVVLLDVTPLSLGIETMGGVFTKLIDRNTTIPTSKSQVFST…
350	AMQ96436.1	AS238_04670	amino acid ABC transporter ATP-binding protein	0.0155	13485	9.38	Cytoplasmic	120	MKKLLIGLLVFIVVVLAGVKIADYVVMGGEEYYVQITTDGTKTVSKSDSGQETVNYRYILPGYTKEGKEKELDFKGQLTRPLRKGAYLKITWNKNKGVTSYEEVEKKDVPKTALEKLIKG
351	AMQ98214.1	AS238_15170	metallophosphoesterase	0.0154	47469	6	Cytoplasmic	406	MVKFIHAADLHMDRSFEGLTTLDKTVQEKLLKTNLTVLSNIIEQAIINNVDFVLLAGDNFHQNRPSLKIQKHFSEQMKRLEKNHIPVFIIFGNHDFYQKERYWFSFPKNVHLFTSETVETKKITIKSGETVSLSGFSYRQPWIQKDKVMEFPSRELTDYHIGLYHGEPGVSQKGNYAPFQPSKMQEKGYDYWALGHIHVPTVLNEKQTIVYPGAPQGHTKKEQASTSILLVELSKGSCQIHPIKVAEVYWKTKEISLRKARTTKEVIVHIRQQLSKVEDGFSLIEIKLKDYDHLNTDVLERIQSGELLDYLLEEFSDRINDFFIWRISLIENTFYTKTPLAASAKLMEQLFQYYQTPQDFQQILNEVYSHQEAARILSELPEYQEETLEKAKQLLNQDF…
352	AMQ97169.1	pyrE	Orotate phosphoribosyltransferase	0.0154	23151	5.06	Cytoplasmic	209	MNVEQSIAKDLLEIEAVFLNPSNPFTWASGIKSPIYCDNRITMSYPKVRKEIAKGLASKIKEAYPEVQVIAGTATAGIPHAAWVAEILDLPMVYIRSKAKDHGKGNQIEGRIFEGQKMVVIEDLISTGGSVLEAAEAAKREGADILGVAAIFTYELPKGKANFEKAEIPLMTLTNYSVLIEAALEDRYIDEQELTLLKEWKKDPENWQI
353	AMQ96671.1	macB	multidrug ABC transporter ATP-binding protein	0.015	28572	9.01	Cytoplasmic	255	MEKMIEVKHLSKSYGSKLSPVKALDNISFTVEEGEFVGIMGPSGAGKTTLMNILSTINLPTMGSVSIQGKEITKMKNSELSDFRRKKLGFIFQEFNLIDTLNAKDNILLPLAVERMTKEEMEKRVRHVAQLLNIEELLKRYPDELSVGQRQRIAAARALVVQPQVIFADEPTGSLDSKSATELLNYLKTMNQKEKATILLVTHDPYTASYCDRILFIKDGVIFSEVVRRGTRREFFEKVIDMQATIGGGGKMNAV
354	AMQ97030.1	lytG	N-acetylmuramoyl-L-alanine amidase	0.015	23481	5.95	Extracellular	205	MAKKKWKKQKRKNIRWPAVVAGVAVILLAFVFSLKNLSSPFTDNQQENEAQSHQQFIERLVPHAQELQDGYGVLPSIILGQAILESNWGKSTLASKYNNLFGIKAYGDQKKVSLETKEFVNEEWITIQGDFKVYDSWEQSMDDHTQLFVQGVDWNPALYEKVITATNYQEAAQALQDAGYATDPGYAQKIIQVIETYQLNQYDRR
355	AMQ97440.1	arcB	ornithine carbamoyltransferase	0.015	38358	5	Cytoplasmic	339	MKESVFQGRSLLAEKDFTKEELQYLIDFSEHLKDLKKRGIPHHYLEGKNIALLFEKTSTRTRSAFTTAAIDLGAHPEYLGANDIQLGKKESTEDTAKVLGRMFDGIEFRGFSQKMVEELAEFSGVPVWNGLTDEWHPTQMIADFLTIQENFGTVEGITVAYCGDGRNNMANSLLVTGAILGANMRIVAPKELQPEEEIVKMAEGFAEKSGAQLMITDDVDKGVDGADVLYSDVWVSMGEEDKFEERIKLLKPYQINMEMVEKTHNTDRLIFLHCLPAFHDTNTVYGEQMKERFGITEMEVTDEVFRSKYARQFDQAENRMHSIKAIMAATLGNLFIPRV
356	AMQ97178.1	cmpD	ABC transporter ATP-binding protein	0.0149	28803	9	Cytoplasmic	256	MTDILTIKNGRKVVNNGMNEEKVLLDEINLTIREGDFITVLGGNGAGKSTLFNTIAGTLQLSQGSISFKDQLITKDSEEKRARFLSRVFQDPKMGTAPRMTVAENLLLAQKRGQKRKFRLRNLKNQKEDFFRLCQEVGNGLEQHLDTPAGELSGGQRQALSLLMATITAPELLLLDEHTAALDPKTAKALMRLTNQRINEQKLTCLMITHRMEDALKYGNRLIVLQKGKIVQDISEKEKQHLTMGDLLQFFEEVVD
357	AMQ96657.1	AS238_06480	hypothetical protein AX771_03255	0.0149	28663	5.48	Membrane	261	MFLFFLLLVSVGWPVATHADTATVNDEAGLFTTDQIQSLEQQAEKLNEKIKGRVLIVTTTSNSEEPRDFADNYLRDAVGNDQNGSVLLLDMGQREIYISTSGNMIDYLTDSRIDSILDDVYDQMTNAAYYNAAKAYLSKSATYVEDGVPGGHYRVDEETGKITRYKVLTTVEIIIAVVLALILSLVFYFVTVSRYQLKSGIYKYPFREKSSIKLTEKTDRLTNSFVTTRRIPKSPPPGSGGGGSTTHSSGGGTFGGGGRSF
358	AMQ97366.1	gatB	glutamyl-tRNA amidotransferase	0.0149	53584	5.21	Cytoplasmic	476	MNFETVIGLEVHVELKTNSKIFSPAPAHFGAEPNSNTNVIDWGYPGVLPVMNKAALEFGMKAALALNCEISKDTHFDRKNYFYPDNPKAYQISQFDQPIGHDGWIEIEVEGKKKKIRIERVHLEEDAGKNMHGIGGYSYVDLNRQGTPLIEIVSEADMRSPEEAYAYLEALRSIIQFTEVSDVKMEEGSMRCDANISLRPYGQEEFGTKAELKNLNSLSFVKKGLAFEEKRQAKVLLSGGEIQQETRRFDETTNKTVLMRVKEGSSDYRYFPEPDIPKFVIDDEWIQKVKASLPEMPASRRERYIREFGLPEYDAMVLTLTKEMSDFFEAVLENGADAKQASNWLMGEVSAYLNSEKLELAETKLTPENLAGMIRLIADGTISSKIAKKVFRELITNGG…
359	AMQ98421.1	AS238_03970	ABC transporter substrate-binding protein	0.0147	33856	4.68	Membrane	322	MKKNIIIGLGAALLLALGGCAQKDNSAEASDGQKTIGVLQLVQHNSLDAAYKGFKEGLAEEGYKEGDNLTIDYQNAQNNQDNLKSMSEKLVKEDPDLLLGIATPAAQSLLNETTTIPMTVTAVTDLEQAHLVTSNEKPGGNVTGTTDMVPIEKQIGLLLNIVPDAKTIGIMYNNGEANSKIQADLAEKELKKAGVKVKVLTANSTNDVQQVTKSLAKDVDGIYIPTDNTFASAASVVGEVAKETKTPVVAGAVDQVKDGGLATVGIDYESLGKQTGIMAAKILDGKNPSELPVETANDLELYVNKDMAKALGINPDSIKEAE
360	AMQ98075.1	EFUG_01728	hypothetical protein AX771_11745	0.0146	14139	9.47	Cytoplasmic	123	MKVSLGYKGVDELLKHLEEAVTLRDVQMVVKTNGAELTKRMQEKARFNGHWEGDVFVHPTGFTRRSIRMWLLEGGFVAQVGPQSDYSPYLEYGTRFMSAQPFVGPAFNVQKAIFMKDMQRLFK
361	AMQ97622.1	AS238_12680	hypothetical protein AX771_09030	0.0146	29191	5	Membrane	263	MRKKMLFIPFALLLSACSSVTQESDNTHLSSSISETVTSPEKSSTKTASTTEQTMATSNNEKKTALDQLKEQQPNVPMPLDVPVSSGYLNIAATHTKQGYSILYYRTDRPLGLNADELNQETPIATYLYQYGFASSQETIQVLQPFEIDTNGQQVDLGSRITGYQQGAAGSSFLEWQEGNWRIRIRGNNIEGQDPLLLAKEIVAYLEENSLPAPEQFGKITVDMGDTTNRAVEVSWQEPKNAYTITHQDPMSALKMAVSMKRL
362	AMQ98324.1	cysE	serine acetyltransferase	0.0144	19268	9.64	Cytoplasmic	178	MSWFTRAIDAAKRNDPAARSTAEIVLTYPGFHALFWHRFSHFLYQHRLFLLAKINAQFWRFLTGVEIHPGATIGTGVFIDHGMGIVIGETAEIEDDVILFHGVTLGGTGKETGKRHPTVKQGAMLSANAQILGPVTIGKNAKIGAGAVVLKDVPDDATAVGVPAKVVRIKGEKVRRSE
363	AMQ96100.1	dnaA	chromosomal replication initiation protein DnaA	0.0142	49975	5.59	Cytoplasmic	444	MVSLDALWNELKATYQKDLSPASYNTWIETANPRTLDQNQLVVEVPSKIHKEYWEKNLATKIVEVGYMLSGNEIIPRFITGEEAEQEEVIEEKNPKVVAPSPLKKAMLNPKYTFDTFVIGKGNQMAHAAALVVAEDPGSIYNPLFFYGGVGLGKTHLMHAIGHQMLQSQPNAKVKYVSSETFANDFINSIQNKTAEEFRQEYRNVDLLLVDDIQFFAEKEATQEEFFHTFNALYNEGKQIVLTSDRLPNEIPKLQERLVSRFAWGLSVDITPPDLETRTAILRKKAAAERLEIPDDTLSYIAGQIDSNIRELEGALVRVQAFAAMNSEDISTSLAADALKTLKSGKGHPQLSILQIQEEVAKYYHIQLKDLKGKKRVKSIVVPRQIAMYLARELTDNSL…
364	AMQ96221.1	treB	PTS beta-glucoside transporter subunit EIIBCA	0.0142	70652	5.4	Membrane	662	MAKYQADAEKLLHDIGGKENIAAVSHCATRMRFVLNDPGKADEKAIEDIPSVKGMFTNAGQFQVIIGNDVSTFYNDFVAVSGVEGVSKEQGKAAAKQNLHPVQRAIAVLAEIFTPLIPAIIVGGLILGFRNVLEGIQFESLGGTIVEHSKFWNGVNAFLWLPGEAIFHFLPVGITWSIAKKMGTTQILGIVLGITLVSPQLLNAYSVASTAAADIPFWDFGFAQVQMIGYQAQVIPAMLAGFMLAYLEIFFRKYIPQSISMIFVPLFSLLPTVLAAHVILGPIGWTVGSWISNIVNTGLTSSISWLFSAVFGFLYAPLVITGLHHMTNAIDMQLIADFGSTNLWPMIALSNIAQGSAVLAIIFLHRGNKKEEQISIPAMISCYLGVTEPAMFGINLKYV…
365	AMQ98120.1	AS238_09710	hypothetical protein AX771_11995	0.0142	50005	5.14	Membrane	438	MRISEKVVRIGLILMVALSIYFSYAIWLSPAGKSSINVDETNTQMIESQSNRKTSEVFLPLHVTWHHSGMIQETNSENLVYRLQLIIDKARFGKLSEVVSGDKSQFEQVKNLNSGFELAYNAPFLLREYKEAFDLDLDVSNLAKESENMYFTRIQFDQGNKKIRFLNYSNHLVYEANISLNWTDINKELTAKDTKWTEMTTEPSTIDTQYATKHSIKLKKYSYILSQQPYTLFRNAFFQKPDSVKNNDESNELIFYGGNETMSIHSETQVVDFRGELPEKKENASVFSESFPYISKLGSSLGNLRYFDRSDNTIDYRIFVEGFPVFGTDSRGQIGVEVGGETNGSVQVNIQTSLNTIQVPIPSDEEVELASTNEIIQQLKAKGADSNKIGSVIVGYTWQ…
366	AMQ97969.1	AS238_08620	hypothetical protein AX771_11090	0.0141	14591	10.76	Membrane	125	MGKLVAVAQSLLDILKWLMEGSNWIFVLPLLLISLFIMFRMVRKKETFLIFIWYAASVGVATLMVELALGSWEACVFALFFAVLYLIIYIPYMKRKSRIGRKGRHTTTFSSTDSLEQSRRTRRRR
367	AMQ96297.1	infC	translation initiation factor IF-3	0.0141	19594	9.96	Cytoplasmic	174	MTIAKDMMVNDGIRARELRLIGSDGEQLGVKTKAEALNIAEQANLDLVLVAPGAKPPVARIMDYGKYRFEQQKKDREARKKQKVINVKEVRLSPTIDLNDFNTKLRNARKFLEKGDKVKASIRFKGRAITHKEIGQKVLNRLAEETADIATVEQKAKMDGRSMFLTLAPKNDSK
368	AMQ96636.1	B1P95_03135	PTS mannose transporter subunit IID	0.0141	29821	9.05	Membrane	273	MKLADGISKDEKKLVRKMFWRSMTMYASVNPVTMGGGGFAYSMMPFINHFYKSEEDRAAALERHTQYFSTTIPCASFVMGIAASMEKENSEKAGFDVESINAIKTSLMGPLAGIGDSLFWGVWRVVTAGLAINLANAGNILAPIIFLVMFNIPNYLMRYYGGVLGYSLGSKYIEKLYANGLIEILTKAASILGLIMVGAMTISMVKFNTVLSFSMKGEELMNVQEILDSIFKGIVPLLVTLSCFKLLDKKVGVIKIIFGMVVLGILLSLLGIA
369	AMQ98438.1	walK	histidine kinase	0.0141	45551	5.97	Membrane	402	MTQDSKRATEKRRRINLTSKEISELLAEGIITIILLLLLNVSILVVISSVINSSPSLTNAIWDSKNIFAERLNTDLFWNGRNFIIPFFFLLDIGVLYWRLIRRYRQMQLRHIISELHYIANGNYDHRIPFELSGDLSRVVTSINGLVDSTVAAIEDERKIEKSKDELITNVSHDIRTPLTSIIGYLGLIEDGQYHSEEDLLKYTHTAYIKAKQMKSLVDDLFEYTKVRQPAVPVNFSAFDMIQLIEQLAADFELEASKKNIQILVQSKVDSLIMDGDTEKLVRVFNNLLTNALKYGKGATKIVIEVERIGSEVVATVKNNGAMIPQQAIDNLFDRFYRVEESRSQATGGTGLGLAIAQSIVALHGGYIYAKSDKQWTSFIMHLPIKKNEKLPIDTQEVI…
370	AMQ98264.1	CUM68_12435	multidrug ABC transporter permease	0.0141	66079	5.24	Membrane	589	MTDLIKASKFFYHYLKRYKLSFFFIFITVIIATYLQVKAPQYIGEAFQELANYVGGLMQGVDDKSKFVSVIWKLLLFYVLASAANFIYSILFTQVVGKSTNRMRIGLFNKLEKLTIRFFDSHQDGEILSRFTSDLDNIQNSLNQALLQVITNAVLLVGILIMMFRQNVELAWATIASTPVAVLIAVLIIRKARKYVDLQQDEVGKLNGYMDEKISGQRVIITNGLQEETIEGFLEHNQSVREATFKGQAYSGLLFPMMQGMSLVNTAIVIFFGGWLALNGDLERSVALGLVVTFVQYSQQYYQPLMQISSGYSMIQLAITGARRLNEIFDEKDEVKPENGKAFDGVEKGLALQHVDFGYSPEKLVLKDVSINVDKGEMVALVGPTGSGKTTIMNLLNRF…
371	AMQ96810.1	ktrA	potassium transporter Trk	0.0141	24720	5.08	Membrane	221	MKQNFAIVGLGRFGGSICRTLIEAGQEVLAIDSNEDRVNEYMNIATHAVVANAQDEMTLRSLGIRNFDHVIVAIGEDIQASILVTLMVKEMGVPNILAKAQNEYHARVLEKIGADRVVHPERDMGIRIAHNLVSKNILDYLELSDKYSLAEIRVSNPKFFNKTLAELNFRQRFDLTVVAIRRVDQTVIASPAADEYVRENDNLLVIGETGDVDILDDKMNQ
372	AMQ97222.1	AS238_03440	hypothetical protein AX771_06640	0.0139	56227	5.4	Cytoplasmic	502	MKKIGFDSEKYIEEQSAYILERVNHYDKLYLEFGGKLVDDKHAKRVLPGFEEDAKIKLLQKLKDQAEILICVYAGDIERNKIRGDYGITYDMDILRLIDELRGYGLLINSVVITRYSGQPATKVFINKLERRNIKVYKHSEIEDYPVNVEKIVSEDGFGKNEYIETTKPIVVVTAPGPGSGKLATCLNQLYHESQKGHAAGYSKFETFPVWNVPLKHPLNIAYEAATVDLKDVNMIDSFHFDAYNKVAVNYNRDVETFPVIKRIIEKITGKESVYQSPTDMGVNRVGFGIVDDTVVQEASKQEIIRRYFQTECDFKKGLIDEEAVNRIKLIMEEVGLRPEDRNVVVPAHDYADKIQAQSPTKDPSAVIAIELPDEVIITGRTSSLMDASAAVILNAVKH…
373	AMQ96707.1	ftsQ	cell division protein FtsQ	0.0138	46031	4.99	Membrane	406	MSKKKEPKKLSHPSSDENNLTPWQKANRKYLAEQEMKNQEPKKEDITLDTPLSDSEEEKTVQEEQQEESQSEKKIEFFEEIKQKKNGGPYNGSFLNRLPNLKSQRHKVLFRRLALIITVLGIPLIFLIYYVSPYSKLQAVAVSGNKTVNSQEIISDTKLSLGENVWGQYFHRSTYIDRLKKAQPRIETANIHFKGMNEFDLDVTEYKEIALIAKNNQYYPVIENGTVLDEKVANPTKNLPILEEFKDSAKIKELTKQYNQLSSELQKAISEIKYTPRASNKNLIQLNMNDGNQVIVNINNLANQMKYYSQVAKDMDEKGVIDMEVGIFSHPYGSTQETEESGQSEETTESEENADQTNESSEEAETQKAQTPGSSSTNGSSDSNDSSETSQIEDNPSTT…
374	AMQ98000.1	fliY	amino acid ABC transporter substrate-binding protein	0.0136	30790	5.05	Membrane	271	MKKTSFLFALIAGLLLFAGCSNKKTSADNWATINEEKKIVIGLDDTFVPMGFRDKDGKLTGFDIDLAKAVFEQYGITVDFQPIDWSMKEFELNNGTIDLIWNGYSKTPAREKKVQFTKPYMENDQVLITPKESGITNFGQMNNKRLGAQNGSSGYDVFTKQPEVLKEIVKNQDAVLYDSFNEALIDLKSRRVDGLLMDKVYADYYLKQRNELEDFNITKGSYESEDFAVGARKSDSTLVKKINEALDQLEKTGEFQKISDKWFGEDVTPRN
375	AMQ97430.1	uppS	UDP pyrophosphate synthase	0.0134	31102	5.75	Cytoplasmic	270	MLRFFPQKNKYIQEKSEFQFNTDGPIPQHIAIIMDGNGRWAQNRRLPRVAGHKEGMETVKKVTKKASRLGVKVLTLYAFSTENWKRPKDEVSFLMQLPVDFFDTFVPELIKENVKVHVMGYENVLPEHTQDAVRRAIEQTKNNTGMVLNFALNYGSRAEIVTAVQEIAEEVAKGEIHAEEIDDELIAKHLMTGFLPKELQDPELMIRTSGEERISNFLLWQIAYSELYFTKALWPDFDGAHLEEAIASYQNRDRRFGGVKKTEDEKGDQS
376	AMQ96989.1	hslU	ATP-dependent protease	0.0134	52558	5.17	Cytoplasmic	466	MYELKQTPRQIVSELDEYIVGQHAAKKSVAVALRNRYRRLQLDEKMQQDITPKNMLMIGPTGVGKTEIARRLAKIVNAPFVKVEATKFTEVGYVGRDVESMVRDLVENAIQIVEKEQYSRVYTSAKKNAEKRLVKILVPGIKKEQKQSTNQFEQMMNLFNASQQNTAEPQEEVTEDIRINRRTVLEQLQKGLLDSREVTIEVEDQKKPAPMMNNGLEQMGIDLNETLGALTPKKKVERTVTVKEALELLIKEESAKLVKDADIHSEAIKLAEESGIIFIDEIDKITSKSQQSGEVSREGVQRDILPIVEGSQVNTKYGIIQTDHVLFIASGAFHLSKPSDLIPELQGRFPIRVELDDLTAEDFVKILTEPNNALVKQYVALIGTENVSVTFTKEAIERI…
377	AMQ97398.1	AS238_11645	hypothetical protein AX771_07675	0.0133	36703	5.5	Cytoplasmic	332	MKMKTYRIRKPKIVVVGGGTGLPVILKSLRNQGADITAVVTVADDGGSSGAIRESIAMAPPGDLRNVLVALSDMPQFYEDIFQYRFKKEDQFLANHTIGNLIIAAVSEMRGSTYEAIQLLAKMMHVDGHVYPSSETPLTLHAVFKDGTTAVGESKIAINRKTIDRVYVCNTNDKSEAKAARKVVSAIMDADMVVLGPGSLFTSILPNLVIPEIGEAMLKTTAETVYICNIMTQKGETEHFTDADHIRVLHKHLNQPFIDTVLVNTEKVPEDYMDPEIYDEYLVQVAHDFNGLRNEGCRVISTDFLELKDGGVFHDGDKVVEELFRLVFGSKY
378	AMQ96141.1	gpmA	phosphoglyceromutase	0.0133	25939	5.08	Cytoplasmic	228	MPKLVFSRHGLSEWNALNQFTGWADVNLAPEGIEEAKEGGRKIKEAGIEFDVAYTSVLTRAIKTCNLILEYSDQLWVPQIKSWRLNERHYGKLQGLNKKETAEKYGDEQVHIWRRSYDTLPPLMEETDEGSAANDRRYAMLDKRDIPGGENLKVTLERALPFWQDEIAPALLDNKTVLVAAHGNSLRALAKHIEGISDEDIMDLEIPTGQPLVYELNDDLTVAKKYYL
379	AMQ97952.1	yutD	transcriptional regulator	0.0131	26345	9.2	Cytoplasmic	225	MSAKQNEQQNVEHKTEIAKKKSSAEQETTVTEELTAALEEIVEEPKAEKVKGELVTLLDDSNFLIGERHYRLVSDYREGFNAEKLGERYSDVLARYDYIVGDWGYEQLRLKGFFQADNRRAHPDQRIDSLEDYLYEYCNFGCAYFVIERIGGKKEKTTQRRKKKKNHNRAYIDEKKGPVASNRKKPVIKNRKTESAKTSEKVKKQEQPKQVEKTKTAFTIRKREE
380	AMQ97743.1	pstA	phosphate ABC transporter permease	0.0131	31561	9.1	Membrane	294	MNAKRSDKIATGVLYVVSGIIVLILAALLLYILVRGIPHISWSFLTEPSKAYQEGGGIGIQLFNSIYLLLITMIISFPISLGAGIYLSEYAGKNWLTDVIRTSIEILSSLPSVVVGLFGFLVFVIQFQYGFSIISGALALTVFNLPLLTRTVEESLQAVHYTQREAGLALGLSRWETVIKVVVPEATPGILTGVILSSGRIFGEAAALIYTAGQSAPALDFTNWNPLSVSSPISIFRQAETLAVHIWKINTEGTMPDGVSVSAGASAVLIIAVLLFNFGARAIGKRLYRKMTSA
381	AMQ98532.1	B4W81_07955	peptidase	0.0131	80309	5.28	Extracellular	711	MLFIITNITSLIPVHVYADAGRDISSNVTSLTVDPTNITDGGNIKVKFSFDEKKQNIQPGDYLWINWPSEGNIRGEGFQKEIPLMIENKNVGTLTVRKDSAQVVFNENIKNLDSVEGWGQFEIQARNVTDTGEENTGPFTVTSGDKTATVNVTKPASGSSSSVFYYKTGDMLPEDTKHIRWFLNINNNGTYVEQPVKISDEIQSGQRLDPSTFEINQIHLGEQKVYRGEEGIQQFLQDFPSATFNFSVTDNYIEITIPKNFVNLRKIMVSYKTIIENPEQINFENHSEAWFKEFNKPAVDGESFNHTVKNISASGGVNGTVRGELKIFKYINDTEIGIPNVTFELRRADEQPIQGQSSILLTSNEQGEASIKGLQVGDYVVKEKEAPNWIDFDPLSSNE…
382	AMQ98114.1	groES	co-chaperone GroES	0.0131	9997	5.09	Cytoplasmic	94	MLKPLGDRVIIEVAKEEEKTVGGIVLASAAKEKPQTGTVVAVGEGRLLENGEKVPAAVKAGDQVMFEKYAGTEVKYEGKEYLIVAGKDIMAIVE
383	AMQ97644.1	AWT83_09510	hypothetical protein AX771_09150	0.013	15581	5.35	Membrane	137	MDQKAFIESIDSTIDRLKKEIRFYNRVIGIGNIIKIVLSASIPILIDQASEHRSLLLIVSIASAIITIIQSGMSAFNYQDKVQTSTELLMKIEKEKLLYITKTSPYNKTDEENFHLIVTTLQTELNDIISDFNQVNN
384	AMQ98313.1	AS238_02895	transcriptional regulator	0.013	31908	4.82	Cytoplasmic	294	MAFETIGEKLRQARLNKKISLDELQQITKIQKRYLEAIDNDDFDQLPGKFYVRAFIRQYAEAVGEDGDHLVDVFDGKSKLTGSVPERPQPETVSTSRKAMHQEESHPSRFWTSLPVILLGLVALAIVVVVGYMTWQDRQADPIIGDTASSLKVEGSVEESSSSEQSTQTKESSTVESTTKSSEEKKMAIATGEDSGSAIAVNITDATKPVTLEFTAVNRVWLGVLVDNAYVYQGTLAANETQSTVLPETATNATITIGAASNATIKANGESVPVNPGENNQSPKNVNLTLQYAE
385	AMQ98134.1	nrdE	ribonucleoside-diphosphate reductase subunit alpha	0.0128	81770	5.28	Cytoplasmic	719	MSLKNLQDVSYFKLNNEINRPVNGQIPLNKDKEALVAFFEENVKPNTMTFPSIMEKINYLIDQEYIEAEFIQLYSPSFIEKLYQFLDEQHFSFKSFMAAYKFYSQYALKTNDGSAYLETYEDRVAFNALYFANGDEELALALADEMIHQRYQPATPSFLNAGRKRRGELVSCFLTQVTDDMNSIGRSINSALQLSRIGGGVGITLSNLREAGAPIKGYEGAASGVVPVMKLFEDSFSYSNQLGQRQGAGVVYLNVFHPDIIAFLSAKKENADEKIRVKTLSLGVIVPDKFYELTRKNEDMYLFSPYSVEKEYGVPFSYVNITAEYDHLVANPNIRKQKIKARDLENEISKLQQESGYPYVINIDTANRENPIDGKIIMSNLCSEILQVQTPSVINGKQE…
386	AMQ98455.1	murF	UDP-N-acetylmuramoyl-tripeptide--D-alanyl-D-alanine ligase	0.0128	49007	5.03	Cytoplasmic	450	MNLTIQEIAQAVGSECSALTKITNVEFDSRKITEGSLFVPLAGTRDGHEFIQQAITNGASASFWSLPVEQAPKNFPVIPVADPLKAMQQLATYYLEKVGAEVVAITGSNGKTTTKDLTASVLSEKYKTYKTQGNYNNNIGLPYTILHMPQDTEKIVLEMGMDHANEITELSLMAQPKAAAITMIGEAHIENLGSREGIANAKMEITDGLVSDGLLVVPADEPLLTPLTATLVQTVTTFGIGNGDVHAEVTAKGKAQTDFVVEGETFTIPLPGSYNVTNALIAYTIGRFFGLSIPEIRQGLAHVSITQNRTEWLTAGNGAAILSDVYNANPTAMGLVLDTFKNLPTKGRRIAVLADMLELGKESLNMHAQMSEHIDPEKFAMIFLYGEQMHALKEELNQK…
387	AMQ96762.1	AS238_04350	hypothetical protein AX771_03875	0.0128	15688	4.77	Cytoplasmic	133	MVIDNSKEKERLNKQISAIKTSLEEHFGLKLFQDSVGEDELPDDFNYFILETGEIEMITEPKYSVGQNLYLTFYSENREDLTGDSLDIISLIQNRSIRFQRMDPNHLKLENQDRYIDQLVFTFRRLLKSDCHG
388	AMQ97534.1	CUS02_09565	peptidoglycan-binding protein LysM	0.0128	32387	4.61	Extracellular	295	MKKIITSLLVFASLLLFTACGKKVTTEDLKANDWLIEATKKDEPNMIASFSDHVVTFSVDTSSMKSTSSNDWEAMGEEFAKSLVDQMNYKFEYTLEGDVMTWKDDKDQDNDAKYTVSKEDKNIILTPEKSNKSDDKEKLVLKPYKKEKTKESRTATSSTSSHEQLSSTTTENTVASSSTLEQADIAQNTPSETSSTYSVESIENYAEAAPSSSIEQVSPTPSSTEQSVPQDYVPANQAQPTAPSSSGTETLTLQPGEGPKQIAERAGITVDQLLALNGMDPNNYMLYPGQELRVK
389	AMQ96955.1	AS238_06285	carboxymethylenebutenolidase	0.0126	27049	6.54	Membrane	245	MKIFRRILIGLVIILGLLGGAGYYYIQQNTYEPSSEAQVLVKEGKNKEDYLFFEGEKKNHGKSPLLIFYPGALVEPESYSIWAQDLAKNGFSVAIVKMPLDLAVMGGNKADKVKEDFPNSDYVIGGHSLGGVMASRYVNKNHSDKHLKGVFFMASYPDKKGTLTESAVPVLSITATKDKVLNQEAYQEAKQYLPERTEYVSINGGNHGGFGSYGEQKGDGEAEISNADQQTVIVNTLENWLKKLK
390	AMQ96667.1	rsmI	16S rRNA methyltransferase	0.0126	32699	5.84	Cytoplasmic	290	MYNQKSFKGNPVYGDLYLVPTPIGNLEDMSYRSVRMLQESDLIASEDTRNTQKLLNHFEIHTPQKSLHEHNYKERVPQLIALLKEGKTIAQVSDAGMPSISDPGHELVLACIKEGISVISIPGPTAGMTALIASGLVPQPFLFYGFLPRKKKEQKETLKKLKEQTVTLIFYESPYRITATLTNFLEIFGNRQVVLCRELTKVHEEYLRGSTEELLAYIEEHPVKGECCLLVEGNLFEMPVTEVDEELGTLKEQVEAKIASGEKPNAAIKAVALKNGLKKQEVYRQYHELD
391	AMQ98487.1	AS238_06215	ATPase	0.0126	88277	5.73	Membrane	797	MFLILEHARLKHVIIFESWRKMEKKKMNGLTQQEVVQKMASGQQNDYQEDASKSTKQIFSDNILTLFNFLNFGIGICLLFVGAYSNMAYLAIIVVNIVIGIYQEIHARNLVRKLSIVSQSEVLVIRDGKEQSISTKELVLGDLVKIGAGEQIPADLQVISGRAEANEALLTGESDLIVKETGAELLSGSFLTSGSVMAEVIRVGADNYAVRLTSEAKTHKAIRSELVDSIRKVSKFTSFVIIPLGIILFLEALFIRDASIKISVIASAAALLGMLPKGLVLLISIALTTGVTKLAKKRILVQDMYSIETLAHVDTLCLDKTGTITEGKMSIQRVEALHPLYEKAIPEIMGTYLAESSDNNITMRAMRDYFELSNRYDVTNKVAFSSDRKWGAMEFPELG…
392	AMQ97624.1	rpsP	30S ribosomal protein S16	0.0125	10349	9.99	Cytoplasmic	91	MAVKIRLKRMGSKKSPFYRIVVADSRSPRDGRFIETVGTYNPLKDPAEVVLKEDLVLDWLSKGAQPSDTVRNILSKEGVMQKHHEAKFSKK
393	AMQ97387.1	dacA	hypothetical protein AX771_07610	0.0125	33065	5.5	Membrane	295	MSFQIGELFNLDYWQQMFSGDLFSLNFLVNILDILVVWYLVYKLIQLLRGTKAIQLLKGVAIFIVIRIVAEIIGLHTLSWLMNQVITYGVIAAIVIFQPEIRRGLEHLGRSSLFKQSKSEQQEDEKMILSFDKAIQYMSKRKIGALITIERHTGLDEYIETGIALDADITGELLINIFIPNTPLHDGAVIVKEGKIAVASAYLPLSESMLIPKEFGTRHRAAVGISEVSDAITIVVSEETGDVSITLDNELMAGLSQQEYLAILRRELIAEEKTKNKKNVIQSFLDGMTKGGDRK
394	AMQ96832.1	AS238_03690	ATP-dependent Clp protease ATP-binding subunit	0.0125	83344	5.12	Cytoplasmic	744	MLCQNCGKNEATIHLYATVNGQRTQLDYCQSCYQKIKNQQNGGLTNMAQNDPFGFGSLDDLFRSMSRQMQQQGNYEQTPPTQFGGNNNFNGGQPPQGNTEGLLGEYGINITEQARQGDIDPVIGRDDEIKRVIEILNRRTKNNPVLIGEPGVGKTAVVEGLAQKIVDGDVPQKLMDKEVIRLDVVSLVQGTGIRGQFEERMQKLIEEIRQAENVILFIDEVHEIVGAGSAGDGNMDAGNILKPALARGELQMVGATTLNEYRIIEKDAALERRMQPVRVDEPTVEETISILKGLQKRYEDYHHVKYTDEAIEAAATLSNRYVQDRFLPDKAIDLLDETGSKKNLTIQIVDPKTIEKKLQEAEEQKVLASREEDFEKAAYYRDQINKLQKMKERQLTEEE…
395	AMQ96768.1	BU181_10185	hypothetical protein AX771_03910	0.0125	78273	5.1	Extracellular	708	MASSLYNLALDFSKELNYTKAIMARQGDKGITVTVKPFLNGLQMDTSGGTFTLKGTTPSNRYVDNVATSVTSEEVTFSLDGTFMSEAGYYKHCYVEYRKDNQILTTQDIIFFSLGVSDISQGQADEYVSQLEELIRKYNETFDAFMAEIKGRVDSLNQQITDLTGQAKTLQDKLDALKEEISKLGNLQVMYSNSIDFGDYDYSENPNLMPYITEPWVGPLLGNGHTVKDSVKRVITHTKTRTANSGDILSLGLGIPCTAEANNRYLITTLRPSTTYTLSVTMSVGSDWTGETNTIGVRLRYLNEQGGIELPINALIPANVERDKMVTHTFTGITKDNVTSITNCYVEIFSLNSEYKGTVSVSYDVKLKAHYPNLLDGPYWLGKVPLGENIADPTVVFPH…
396	AMQ96113.1	ykpA	ABC transporter ATP-binding protein	0.0125	60776	4.78	Cytoplasmic	540	MITVNDVSLHFSDRKLFDDVNIKFTPGNCYGLIGANGAGKSTFLKVLSGDLQPSTGSVTMGPDERMAVLKQNHYDYEDYTVLETVIMGHKRLYEVLKEKDAIYMKEDFTDEDGIRAAELEGEFAELNGWEAEPEAAVLLQGLNIPEELHHQQMSELTGGQKVKVLLAQTLFGKPDVLLLDEPTNGLDIQSINWLEEFLINFENTVIVVSHDRHFLNKVCTHMADLDFGKIKLYVGNYDFWLESSQLAAKLQANANAKKEEQIKELQEFIARFSANASKSKQATSRKKMLEKITLDDIQPSSRRYPFVGFKPEREIGNDLLQVENVSVTIDGKKILDDISFNLSKEDKVAFVAENDITTTTLFKVIMGEITPDTGTVRWGVTTSNSYLPKDTTKEFDTDL…
397	AMQ97425.1	nusA	transcription termination/antitermination protein NusA	0.0125	44257	4.73	Cytoplasmic	391	MSKEMLNALDALEAEKGISKEIVIDALEAALVSAYKRHYGQAQNVEVEFDQKKGKIHVYAVKEVTEEVMDSQLEVSLKDALLINPAYEIGDTIRFEVTPKDFGRIAAQTAKQVILQRVREAERTIIYNEFSAYEKDIMQGIVERQDKRYIYVNLGKIEAVLSKQDQMPNEFYQPHDRIKVYVSRVENTSKGPQVFVSRSHPDLLRRLFEQEVPEVYDGIVEIVSIAREAGDRSKVAVRSNDPNIDAVGTCVGPKGQRVQAIVNELKGENMDIVEWNEDPAVFIANALNPAQVMDVIFDETNPKACTVVVPDYQLSLAIGKRGQNARLAAKLTNHKIDIKSESDMTEFYENQEQQKETEELHDEAIVQSDLTDDEYETIAFNNETVEEKPEA
398	AMQ98273.1	A5836_000540	septum formation initiator	0.0123	16257	7.93	Membrane	141	MTKKSNKIAALDTEYAKKKYAEFQQQQRQLIFRRRRLAAIFVGALVIFAIIGVQIFHDMQRMHQLNELRVEANTEMKEVNADVDQLHQDVSLLKDDEYVAKLARSKFFYSKDGEKVYPILESNTDSSTNETDQSTSSTTAK
399	AMQ96924.1	uspA	universal stress protein UspA	0.0123	16207	4.92	Cytoplasmic	146	MVDTYRNILVAIDGSEKAEKAFLEAITIAKRNQATLHILYVNEVTGNYFGDFAFVTTSLQEELDEVAENQMKEHRNLAIEKGLTDIETYVLYGYPKTLIANFHESKEPIDLIVMGATGLNAVERALVGSTTSYVVNHASCNVMVVK
400	AMQ96188.1	AS238_05830	peptide ABC transporter permease	0.0122	33511	9.69	Membrane	304	MSEKNNTAVQESIPPMGIRMIAREFKKDKIAIFSLGLLVVLLLVIFIGAMLTDQDKVMYVSIFDKYAAPGTVSTQGQKFILGADEGGRDVLGQLIIGARNSVTIGFAITILTSIIGVGLGIISGYYGGIIDNILMRIVDFIMILPIMLIIIVFVSIISRYNVWSFIFIMSAFYWVAKARLFRSKTLSEARRDYVSASKTMGTNDFKIMFREIMPNLSSLIITNLTMNFAANIGIETTLTFLGFGLPANVPSLGTLIGYASNGEVLVNRQWIWLPASILILVLMLSINYVGQAFKRSADARQRLG
401	AMQ98586.1	cds9	hypothetical protein AX771_14390 (plasmid)	0.0122	27761	9.69	Membrane	254	MTNNLEISNLSLLLSSVLLIVALLIDYKEKLGLGNDIFIAGIRAVVQLFLIGYVLSYVLRVDNNFLTLAMVLFIVFNASYNAHTRSEGINRSFKISTTAIGVGTALSLLILVFSGVIDWTPSQIVPITGMIASNAMTAIGVTYRSLNSKFTDQRQQVLEKLALGANKKQASMSIVRESVKTGMAPSIDRTKTVGLVSLPGMMSGLIFAGIDPVQAIRYQIVVMFMLISVTAISSFIASYMAYREFYNNRSQLII
402	AMQ96807.1	AWT83_14935	hypothetical protein AX771_04155	0.0122	27861	9.21	Membrane	243	MNSSWRFFVVVEALLLLFAVWQIVNNTGLLLLVIFGIFNIYLAMRKYPRTKFQNFQLILGSLVIFFSLVNSPALWMMVVLAVLFIGLKGVEISGIDLTKNAFWRKKQIMMVQTEQLKTHNNERKRQQLFGNQRIGNDVYEWDDINIAIISGDTIIDLGNTLLPKDDNIVIVRKGIGRTRILVPLGVAIRLEHATLVGNVLFEEEQFSLKNEQIKICSSDYDENPRRLKIITNTLVGDVEVIRI
403	AMQ98645.1	HMPREF1359_00226	sortase (plasmid)	0.0122	27958	9.04	Membrane	250	MIIRKPKKKRIMGKWIIAFWLLSAVGVLLLMPAEASVAKYQQNQQIAAIDRTGTAAETDSSLDVAKIELGDPVGILTIPSISLKLPIYDGTSDKILENGVGITEGTGDITGGNGKNPLIAGHSGLYKDNLFDDLPSVKKGEKFYIKVDGEQHAYQIDRIEEVQKDELQRNFVTYLEPNPNEDRVTLMTCTPKGINTHRFLVYGKRVTFTKSELKDEENKQQKLSWKWLLGSTVFLSVMIIGSLFVYKKKK
404	AMQ96244.1	rplY	50S ribosomal protein L25/general stress protein Ctc	0.0122	21932	4.62	Cytoplasmic	201	MSVSLEVSKREVRPRSLRNKLRHEGKVPAVVYGYKVESTPISFDGLTLSKLLREHGANTVITMDIDGQKVNTLVHKIQTNTFTNHFEHAEFLSVNMSEETEVETEVVLVGESVGAKSGGVLAQNLYTVVVSATPDKLPERIEVDVTNLELGDSITVADLPKNDDYKFVTDSEEQIAAVVAQSEEESTGEGGEPEVIGSTEE
405	AMQ96958.1	AS238_06305	peptidoglycan-binding protein	0.012	22445	4.32	Membrane	211	MSRKDRHQSTENNETQEPWEQPIYDTDDEVSSRSSQRQQKKGNTLFLSLFLILLVLCIAIPAGAYFWIRNGSSNNATAATSSETSTSVVESSTSTTKEESTETSTVESSTIAEESTVSQDTGVTSESSIAAETTPTSSSEATYQAGDSSSNAAETTPSSSAAAGSTTTVQAGEGPKQVAERAGITTDQLFELNGLDPNNFMLYPGQELRIK
406	AMQ97154.1	ebsA	ebsA protein	0.0118	16814	10.09	Membrane	143	MKKNIRWQPELAHTIIYWSLTLIILFFSLILSLENTGPYWKSNFVLGIFLVFLFLGLRRSFILKSNSVIIRYAAFWKDREISVGQIRSLTPTNTGVQMMLQDEKAPSVFMMRKKDQVVLFDHFEKNGPKSESIPYPYTKKRKS
407	AMQ96624.1	AS238_12030	hypothetical protein AX771_03055	0.0118	22619	10.06	Membrane	210	MKNTKNFTLTAMFLAILILLAVTPLGFIPIGPINATTMHIPVIIASIVLGPRLGAFLGGTFGLISMIRSTVIQTPLSFVFSPFIPVIGTEHGSWKALLIAFIPRILIGVVPYFVYKGLRKLMKQKADSVSLFLAGLSGSLTNTILVMNMIYFLFQQDYAKVIGTNLNAVYSAILAVIFTSGIPEGIVAGLATAAVCNVLLRYFKHPSLTN
408	AMQ98448.1	AS238_00470	RNA-binding protein	0.0118	28476	5.09	Cytoplasmic	252	MPIYEAATIDEAVQLGLADLGLAKDQVEIEILEEGKKGFLGMGRKNARLSIQPSISEKVSETVEQTVEEILEEEPTAEIEVVNETILEEKTEEVSELGDEAALTELAVYLTEISKQLDAPALVKMERESNNMVVFHLETQKQGILIGKHGKTLNALQYLAQVFIHRLARNKLSVVVNVGNYREKRQEIIQRLADRTAEKVKRTGQPVFLEPMPAFERKQIHAALSKDEHVKTHSEGEEPYRYLVVEPAKKYY
409	AMQ98033.1	yheH	multidrug ABC transporter ATP-binding protein	0.0117	70086	5.21	Cytoplasmic	630	MSKTNTRPSHGPAGGPGHGGPGRNLGVKGEKPKNFWGTVRRLFGYMSKRMVAIIAVFVLAIAAVIFQIQTPKVLGKATTEIFKGVMAGAQQMQQGQQVTKFPIDFDKIAQIIATVIVMYLISAVFNFLQQFIMTRVSQRTVYELRHDLEAKMNRVPISYYDTHTNGDIMSRAINDMDNIASTLQQNLTQFVTSAVTLIGVIVMMLSISWQLTLVALLMIPLSLIIVMIVAPKSQVFFADQQKSLGLLNNQVEETYGGHTIVKTFNHTEKDQEVFEKENQNLYAAGWKAQFISAIIMPLMNFVKNLGYVFVAVLGGVKVANGNMTLGDVQAFLQYTTQFSQPITQLASLMNTIQSTVASAERVFEVLDEEEMSNEKSGLPEEKDTPYKVRFENVQFGYTP…
410	AMQ98486.1	AS238_08575	hypothetical protein AX771_04915	0.0115	11105	9.5	Extracellular	91	MKLEDKKVILKKIKRLPDQIDGYTICSFKKDRSIKAYTQNTEKGIIYFLHEEGYDTQTFMFTEKKEFHKQMKKLIEKEFPRSHKLYVNQQF
411	AMQ98260.1	HMPREF0351_12531	muramidase	0.0115	71195	9.27	Extracellular	672	MENIARKERRRLEQTKRFRKAKRGAAIVGTAMVGCSVAAPLVQPVPVQADETPVQFSARINTAAFITEIATYAQPIAQANDLYASVMIAQAVVESGWGSSALSQAPYYNLFGIKGSYQGQTVYMDTLEFLNNQWVNKKEPFRQYPSFAESFNDNAYVLRNTSFGNGYYYAGTWKSNTKSYTDATACLTGRYATDPGYAGKLNNIIATYGLTQYDTPASGNAGGGATTGGNNTGSAGSTGGSSNSGNTNSGSATSTTYTVQSGDSVWGISNKFGITMDQLIQWNNIQNNFIYPGQKLTIKGSQENGSSTNNSGNNTNSSGNAGTSNGGQTTGAKYTVQSGDSVWKISNDHGITMAQLIEWNNIKNNFVYPGQQLIVSNGGSSNAGANTGSNTGNTSGSSS…
412	AMQ98801.1	AWT83_17015	chromosome partitioning protein ParA (plasmid)	0.0115	29015	4.92	Cytoplasmic	262	MARILSVANQKGGVSKTTTSVNLAACLKFVYGKNVLLVDIDPQGNATDNVGFDIDGTNQPTIYEVLKGEADITDAILDYKGIDVLPADIALSSAEREFTQVGSEHRLKRVLQPIKDNYDYIIIDCPPSLGMLTVNAFTVSDEIIIPVEAAYFSLKGLIKLSETIETVKEYTNDKLEVRGVLFTKYNKRYNISKEMTSAATEISRVIGAKIFKTYIRRTITVDEAQAAGSDLINFNKPSTAEDDYKAFTEEYLKEVGDFDGRR
413	AMQ96632.1	potD	spermidine/putrescine ABC transporter substrate-binding protein	0.0115	40951	4.78	Membrane	357	MKKLQSLFLGILIIIAVLLLGVRQLEKTSGMSGAKVLTIYNWGDYIDPSLITKFEKEYGYKVNYETFDSNEAMFTKIQQGGTNYDIAIPSEYMIQKMIKEKLVLPLDHSKIKGLNNIDPRFLDLDFDPDNQYSIPYFWGTLGIVYNDKFFDANQIKHWDDLWKPELKDSLMLIDGAREVMGLSLNSLGYSLNSKNMAQLTEAANKLNHLTPNVKAIVADEIKMYMINEEASVAVTFSGEAADMMWENEHLHYVIPPEGSNLWFDNIVMPKTVKNKEGAYDFINFMLEPENAAQNAEYIGYSIPNEEAKALLPKDISSDEQFYPSDDTISHLEVYKDLGSKYLGIYNDLFLEFKMYRR
414	AMQ98473.1	AS238_09515	hypothetical protein AX771_02630	0.0115	28922	4.5	Cytoplasmic	260	MKNSSNSAEVNVSTSTSEAVQCSQETTSLPEELLGDWQINNKDAGIEISDSKAVFRIGRSQVESKDYYVDVNNKMLLHVYFSFEYDGVKYSEVSIERTGYSEFISKSVGILTMHTKDGQYISLGVKKVSGENNETEAVTEQTMDERIDSSESNETEVDTGKTIDERIDSFIETYTAIPPTWKLVNEDKGITINTDTEISTDAQSLSDLLANLTGISNAVTEQVGKNVPLRLLENGKKDYSVVFKNGQVTDYNEVFKKVIE
415	AMQ98820.1	vanX	peptidase M15 (plasmid)	0.0114	23351	5.41	Extracellular	202	MEIGFTFLDEIVHGVRWDAKYATWDNFTGKPVDGYEVNRIVGTYELAESLLKAKELAATQGYGLLLWDGYRPNRAVNCFMQWAAQPENNLTKESYYPNIDRTEMISKGYVASKSSHSRGSAIDLTLYRLDTGELVPMGSRFDFMDERSHHAANGISCNEAQNRRRLRSIMENSGFEAYSLEWWHYVLRDEPYPNSYFDFPVK
416	AMQ97660.1	ycaM	transporter	0.0112	54070	9.51	Membrane	488	MNNKQLRWFTVALIAFNMVWGMGNVVNNYAQQGVSVVTSWLLILAIYFIPYALIVGQLGSAFKDSKGGVSSWVENTTSNKRLAYYAAWTYWVVHIPYLAQKPQAILIAGGWAVQGNGNIVNTMSVQMVAVISLIIFLAFLYLSTKGLSTLKVIGGLAGTAMFVMSILFILLAVTAPFINPTMEFATPHMNQVKTYIPTFDFSYFTTVSMLVFAVGGAEKISPYVNSTRNPAKEFPKGMIFLAAMVGICAVLGSVAMGMLFASDNIPKDLMANGAYSAFQILGNYYGIGNSLMIIYALTNMIGQISALAFSIDAPLKILLADADPEFVPNWLRKRNRKGTLVNGYLLTGILVGIIILLPIFGIKDMNELVKWLTNLNSVVMPMRYLWVFLAYMMLNKAYK…
417	AMQ96719.1	cshA	RNA helicase	0.0112	48007	9.49	Cytoplasmic	425	MNEFVQVFPENWQKKYEDKGFISPSLIQRAVFQPLSNKQSIVAVSPTGSGKTLAYLWPLLLNVEPGEASALVIFASSQELAIQVADVAREWGKDKELKVQSLVGGANVKRQIEGLKEKPEILIGTPGRILELMKAKKIKAHQVKTMVFDEADQLFDAGNSQIIDQILHQAPTEYQLAFFSATADRSLESIEKITGKTFETIDVTAEDDSRKGLRHYFLRVPIRKKDDYLRRLTHIEDFHGLIFFNQLTELGVMEEKLLYRGVPVGSLASDQNKLLRKAALEQFKKKMVRALLTTDVAARGLDITGLPYVVNAEVPLSEEAYLHRSGRTGRMGNEGIVITLVQDNNLRDLKRLLRPSNITLEEIFLYGGKLQTEQPTKEDAAPAVNKKYAKTFSGKEQNP…
418	AMQ97908.1	BU181_10335	hypothetical protein AX771_10705	0.0112	11368	8.54	Cytoplasmic	99	MKLKDGFYASSHGIGGLMLDMPTKNPKTRKKPKVKVGDMVRCEAEEFIYPFRGYVEHVYNHSAIIRIENTMECDKWLAKSKENLAVARLVDMEVINNEV
419	AMQ96104.1	gyrB	DNA topoisomerase IV subunit B	0.0112	72501	5.54	Cytoplasmic	648	MTEERSLVERAKEYDASQIQVLEGLEAVRKRPGMYIGSTSSEGLHHLVWEIVDNSIDEVLAGFATKIHVIIEKDNSITVIDDGRGIPVDIQAKTGRPAVETVFTVLHAGGKFGGGGYKVSGGLHGVGSSVVNALSTQLDVKVYKEGNVYYQEYRRGAVVDDLKIIEQTDRHGTTVHFTPDPEIFTETTEFDFSKLATRIRELAFLNRGMRISIEDKREEEPVINEYHYDGGIKSYVEYLNANKTVIFPEPVYLEGEQQDIAVEVSMQYTDGYHSNIMSFANNIHTYEGGTHESGFKTALTRVINDYARKQKLMKENDDNLTGEDVREGLTAVISIKHPDPQFEGQTKTKLGNSEVRTVTDRLFSEHFMKFLLENPSVGRQIVEKGLLASRARLAAKRAR…
420	AMQ97104.1	glnP	glutamine ABC transporter permease	0.011	23984	7.82	Membrane	215	MSELIQTYGPIFVDGFKITLFSSVLALVFSLIIGTLMAIFQLSKNKVVSALAKAYVEFFRNIPLLIIVMFFYVVVPIYWFNLDGFQAGTIGLTIYTSAFIAETVRSGIQTVPKGQTEAGLSSGFTYSEIMRYIVLPQAFKIVIPPLGNQFINLVKNSSILAIVAGLDLMYQGDLIASETFNTFDTYIIVGLFYLVITLPLSYLMVYLEKKWAVRS
421	AMQ96307.1	AS238_02015	glycosyl transferase	0.011	36319	5.77	Membrane	315	MEQQEKIAVLIPCYNEEATISTVIADFKRELPEADIYVYDNNSTDRTYELAVQGGAIVKKEPRQGKGNVIRQMFFDIDADYYLMVDGDDTYPAEAVHGLLEKLRSGEADMVIGDRLSNGTYFDENKRPFHDFGNNLVRNTITRMYKTKILDVMTGYRGFNRIFVKSFPIMSSGFQIETELTIHALDKKFKFVEIPIDYRDRPEGSESKLNTFSDGFKVIMMIIKMFKDYKPLLFFGIWTIFFFLFGLVTGIPVIREYMLTSFITRIPSAILSTGLMTLALLSLVTGLILDTVVTNAKKEYELNLYHVYHEYHSRK
422	AMQ97727.1	ccpA	catabolite control protein A	0.011	36430	5.47	Cytoplasmic	333	MEKQTITIYDVAREANVSMATVSRVVNGNPNVKPATRKKVLEVIDRLDYRPNAVARGLASKKTTTVGVIIPDVSNMFFASLARGIDDVATMYKYNIILANSDGNDQKEVNVLNNLLAKQVDGVIFMGHHITDEIRGEFSRSKTPVVLAGSIDPDEQVGSVNIDYVSATKDAVNKLAKSGNKKIAFVSGALIDPINGQNRLKGYKEALSENNLPYSEGLIFEAQYNFKDGLSLVDRIHNSGATAVYVSDDELAIGILDGLLDRGVKVPEEFEIITSNNSLLTEVARPRLTSITQPLYDLGAVSMRLLTKMMNKEEVEEKTIILPYGIEEKGSTK
423	AMQ98637.1	HMPREF1359_00235	hypothetical protein AX771_14705 (plasmid)	0.0109	86639	5.82	Membrane	790	MIIGGIFSGIADWWSGLFGDGDADPKTVTKVLQDYGNYLQYQDVFSWICNTFLWGLIKGLYNLNTLLEKTIYQSFDLKDLLNAAGVNELFQSLISKVLALFCVVTLIYLGLKFFMSKHPPKIKNILVNLFMAMILIFGGSSLIDEGLNISKNFYGDVTAANKADKTGSPAFQIIQNNVIDVSTLLENDPNKVEHIPTDKRNALTAKNFKTANINGIITPDQAKKMSESSDISTVQKDRLKALQYRLELDDNGKEIPVQISDEGLAKYVYTSGYRRYISSPGIILAGESSLAVAYLFILFTIVTCIIELVFKKFYLVIAASTDFETGQRMKSAIEDISQSFLLLAFTILELRIYTLMLSGIGDLHAAGKINGFLYVVALIVLTIALFKGSQSVTKIFGVD…
424	AMQ96601.1	AS238_12995	hypothetical protein AX771_02925	0.0107	24499	9.1	Membrane	228	MENYLSLLGVLIVILGFAFKLDSILIVMVALVVTALTGGLGIQGMLELLGTSFVNNRGMAIFIIIMLATGTLERNGLKESAASLIKRFKKVSAGMIVDIYGIFRMIFAAFNVSFGGVAGFVRPIILPMALGTIESKGLEVHPKHEEELKGMASAMENVCWFFGQVLFIGGAGALLVQSTLKDLGYDVTLGQLALVEVPVAITALVVASVYFYLKEKKLAKKYYPGKGQ
425	AMQ98638.1	HMPREF1359_00234	type IV secretory protein (plasmid)	0.0107	100625	5.86	Membrane	869	MRVRETTRRKDKRFNLEKNRYLSHFYRYTPSGEELPEKHDKRISQKIFYSGLAYLPLNYVVTRIPEAFHRFEIIPGSLQGVNIFQLQEMPQLFHFDSTGFWNPLTPTTSLGTRLVVSTICVVPAVLMGLKMDMWFRPLADGQKGDNRLKTLKEIQQIYPQIPESKGGFPGYGGIPITHYKKYWYIQTDTVNTCIVGTSRSGKGQIEVLATIDNLSRAERQSSMVVNDPKTELYVASKDELEARGYDVYAFNITDPLQSMSDNPLALIVKYWKRGDIDTATQLTNTFTNTIYYDANASDNKYFNENAQKAVNALIFTLLEQADQTGDYSKLTPNNLVELLSEIGGFNYQDPDNEFKQLNALDEFMNQLPPGNIAKKQYGATKIGSDKAKGNILSTAITGL…
426	AMQ97359.1	aroF	3-deoxy-7-phosphoheptulonate synthase	0.0107	37344	5.69	Cytoplasmic	340	MIVIMKKEATEEQIKKVVDHIEKEGFKVSIDQGTERVVIGLKGDTRSLQEGAFTRYEGVENAVRILNTYKLTSREFHPGNTVVDVDGVKIGDGSFVTMAGPCSIEGLDQIRECARMAKAGGAKILRGGAFKPRTSPYAFQGLEEEGLKYIRQAADEFGMKVITEVMDEGHIDMVAEYSDILQIGARNMQNFKLLSAVGKTGKPVGLKRGISGTINEWLNAAEYIAVEDKSPVIFIERGIRTYETATRNTFDLSAVPLMKKLTHFPVIVDPSHGTGIWELVPPMARAGVASGADGMIVEIHPDPANAWSDGPQSLNEKTYSRMMKEVAIMKEAMEKIQTLD
427	AMQ96663.1	tmk	thymidylate kinase	0.0107	24378	5.65	Cytoplasmic	214	MNGLFITIEGPDGAGKTSILNELYPLLKEVAKTEIIQTREPGGIPIAEEIRAVILDPKNDRMDERTEALLYAAARRQHLVEKVLPALAKGKIVLCDRFVDSSLAYQGAGRRIGVTEIARLNEFATEGTTPDFTLYLDVDSDTGLRRIKKNRQNQIDRLDSEGLEFHQRVRHAYLKLAEENPERIHKVDARKSFEEVLQTSYHTIIEQYPQFFEN
428	AMQ97029.1	AS238_02400	peptidase M15	0.0107	30741	5.1	Extracellular	274	MNKFLGFGAVVIMIAAMGYVIFSDDDSHVQAGNQAVERTSTKTTASKEKNSQTTSSKVKDKETKDRTSKQLPDVKTDDWKLVLVGPDHKLEKEIDESTQLASLSNGYLIDKRIAPEYEAFAKAAEAAGFPLVMVSAYRSVSSQQQVFEQNVQDVMSRQGVSEEEATKITKETITEPGYSEHHTGLAVDVVDQNWYNSYPSTVLDASYGDQPGAKWIADNAAQYGFIVRYPKGHEDITKITYEPWHLRYVGKENAEYITKHQLTLEEYLNELNEK
429	AMQ96646.1	fba	fructose-bisphosphate aldolase	0.0107	30732	4.89	Cytoplasmic	289	MPVVSGAEFLKAARKGGYAVGGFNTNNLEWTQAILEAAEAKQAPVLIQTSMGAAKYMGGYKICKDLITDLVEAMNITVPVAIHLDHGDYEAALECIELGYTSVMFDGSHLPFEENLKLAKDVVEKAHAKGISVECEVGSIGGEEDGIIGNGELADIEECKQMVATGIDYLACGIGNIHGQYPENWKGLAFDHLQAIADAVGPDMPLVLHGGSGIPQDQIEKAISMGISKVNVNTEFQLSFAAATRKYIEAGKDKEGKGFDPRKLLAPGKAAIVEDAKSHIDWFGSANKA
430	AMQ97813.1	mutS	DNA mismatch repair protein MutS	0.0106	88378	5.53	Cytoplasmic	786	MNNRILETLEFEKVKQMVRQFVVTAQGKEELAELVPVSEKQTITNWLQETEDGLKVQRLRGGIPIPKLENIRPHMKRIEIGADLNGVELAQVSRVLSTTSELNRFIDDLSDSEIEFARLYMWADQLVTIPVLSRRLKEAIDEDGRVTDDASPELKSIRQNIRRSEQAVREQLDGIVRGKNAKYLSDAIITMRNDRYVIPVKQEYRGVFGGVVHDQSASGQTLFIEPKQVVDLNNRLRQYQIAERNEIQRILSELSAELVPHRQEIIHNAYVIGKMDLMNAKARFGKEVKAIVPGISEDNHVVLKQARHPLIDQEKVVSNDITIGKDYQAIVITGPNTGGKTITLKTLGLLQLMGQAGLPIPAGEESQIGIFEEVFADIGDEQSIEQSLSTFSSHMTNTV…
431	AMQ96664.1	A5810_000354	hypothetical protein AX771_03290	0.0106	11863	4.77	Cytoplasmic	109	MKIILAIIQDKDSNRLSNELIDANIRATKLSSTGGFLKAGNSTFIVGIEDDRVEEALEIIKKTCESRKQFVSTPVTLDISMDGGVPYPVEVEVGGATVFVLPVEGFHQF
432	AMQ98557.1	panC	pantoate--beta-alanine ligase (plasmid)	0.0104	31648	6.37	Cytoplasmic	282	MVIFKTVNDVRSQVKEWKKQGLKVGLVPTMGYLHEGHESLIRKASKENDKVVVSIFVNPTQFGKNEDLGSYPRDLERDIEVCTRGRATAIFNPEVEEMYCDNASTFVNITGLTEGLCGASRPIHFRGVCTVVSKLFNIIPADRAYFGEKDAQQLAVIKRMVRDLNIDIDVVGCPIIREEDGLAKSSRNTYLSLEERSSATILNKSLTLAKEALNNGERDSLKIIEIISKNINTYNLAKIDYVEVVDSLSLQRVNYIEKSVLVAIAVFIGKTRLIDNFTFELQ
433	AMQ96129.1	guaA	GMP synthetase	0.0104	57842	4.9	Cytoplasmic	521	MTNVADMTNVEKIIVLDYGSQYNQLITRRIRDLGVFSELLSHRITAEEVKAMNPKGIILSGGPNSVYDENAFGIDPEIFNLGIPVLGICYGMQLITYKLGGSVEPAKNREYGKALLEVTSDQAVLFKETPKQQTVWMSHGDLVTKVPEGFETVGTSKDCPIASIQDTTRNFYGIQFHAEVRHSEYGIELLRHFAFDVCHCEGNWTMDNFIDMQVEKIREQVGDKKVLLGLSGGVDSSVVGVLLQKAIGDQLTSIFVDHGLLRKGEAEQVMESLGGKFGLNIIKVNARDRFLDKLKGVSDPEQKRKIIGNEFVYVFDDEATKLAGEEGVSFLAQGTLYTDVIESGTETAQTIKSHHNVGGLPEDMQFELIEPLNTLFKDEVRELGTQLGMPDSIVWRQPF…
434	AMQ97381.1	AS238_05385	hypothetical protein AX771_07580	0.0102	25283	9.08	Membrane	219	MSELSNENKEQEKDKQQQPAVGPDSNFSQKVLSSFEREPLTPEEIKKKQRKWKKYTDTRNEPPKANDFPKYFYAGFFIRMFAFLVDLLCIGAITRLTLGIAKNLGWLNFSDSYLSLYGFTALLIYLAYFILLTKFNHGQTIGKMIFGIRVISFDEEELSWSTVLVREGACRFILKFPLLMLGYLPAVFNQKKQHLGDFFTNTSVVTINLIKAFNQEVNS
435	AMQ96789.1	rmlA	glucose-1-phosphate thymidylyltransferase	0.0102	31891	4.86	Cytoplasmic	288	MKGIILAGGSGTRLYPLTKATSKQLMPIYDKPMIYYPMSTLMLAGIKEILIISTPQDTPRFKELFGNGNDLGLQIEYAVQESPDGLAQAFIIGEEFIGDDSVCLVLGDNIYYGGGLSKMLQRAASKDTGATVFGYHVNDPERFGVVEFDENMQALSIEEKPAQPKSNYAVTGLYFYDNEVISIAKGIKPSERGELEITDVNKAYLDKGKLSVELMGRGFAWLDTGTHESLLEASTFIETIEKRQNLKVACLEEIAYRMGYIDKEQLLALAQPLKKNQYGQYLLNLAAE
436	AMQ98491.1	AS238_15270	aminotransferase	0.0101	45764	5.19	Cytoplasmic	405	MREFEKSNKLEGVSYDVRGPVLEEAERMQEEGISILKLNTGNPAPFGFEAPNEVIRDLIMNARDSEGYSDSKGIFSARKAIEQYCQLKHFPNVTINDIYTGNGVSELITMCMQGLLDNGDEVLVPMPDYPLWTASIALAGGTPVHYICDEEAEWYPDIDDIKSKITSRTKAIVIINPNNPTGALYPKELLEEIVEVARQNNLIIYSDEIYDRLVMDGLEHIPIATLAPDLFVVTLNGLSKSHRVAGFRVGWMVLSGDKSHVKGYIEGLNMLSSMRLCSNVLSQQIIQTALGGYQSVDELLLPGGRIYEQREYIYNAINDIPGLSAVKPKAAFYIFPKIDTKRFNILDDEKFVLDFLHEHHILLVHGGGFNWNQPDHFRIVYLPKMDDLKQTAKKMREFL…
437	AMQ96178.1	ecfA	energy-coupling factor transporter ATPase	0.0101	32389	4.79	Membrane	289	MDIRFEQVDFTYQPNTPFEQRALFDINMTIKENSYTALVGHTGSGKSTLLQHLNALVKPTSGTVHIGERDIQPDTDNKNLKPIRKKVGIVFQFPEAQLFEETVAKDIAFGPKNFGVSEEEALVLAKETLEQVGLDESYLERSPFELSGGQMRRVAIAGVLAMRPEVLVLDEPTAGLDPQGRKEMMEMFWRLHKEQQITIVLVTHLMDDVANFADYVYVLEKGRIVNSGEPQEVFQNIEWLKEKQLGVPTATEFAEELMAKGMNFATLPLTAEELADAIVHYAGGNAHDE
438	AMQ98458.1	B4W81_03185	deoxyadenosine kinase	0.0101	25681	4.75	Cytoplasmic	217	MIVLAGTIGAGKSSLTEMMAEHFDSQAFYESIDDNEVLPLFYANPEQYAFLLQIYFLNKRFASIKQAMKDDNNVLDRSIYEDSLLFHLNADLGRATETEVRVYDELLENMMEELPYAAHKKHPDLLVHIRVSFDTMLERIEKRGRSYEQLSFDPSLYDYYKELNRRYDQWYEEYKESPKIQIDGDRYNFVEDPQAKEEVLKMIEEKLAEIRQTKVAI

## Sheet: MVsVAN
Number	Accession number	Gene name	Description	Mol%	MW	PI	Cellular localization	No. of amino acids	Sequence
1	AMQ96166.1	rpsE	30S ribosomal protein S5	19.112	17467	9.43	Cytoplasmic	166	MVYIDPKHLELEDRVVAINRVTKVVKGGRRLRFAALVVVGDKNGHVGFGTGKAQEVPEAIRKAIEDAKKNLVEVPMVGSTIPHEVIGAFSGGRILMKPAVEGSGVAAGGPVRAVLELAGVADITSKSLGSNTPINVVRATVEGLKQLKRAEEVAELRGKSVEELIG
2	AMQ96161.1	rplE	50S ribosomal protein L5	4.7452	20177	9.3	Cytoplasmic	179	MNRLKEKYLKEVTPSLMEKFNYSSVMQTPKVEKIVINMGVGDAVSNAKNLDKAVEELTLITGQKPMITKAKKSIAGFRLREGMPIGAKVTLRGERMYEFLDKLVSVSLPRVRDFHGVSKKAFDGRGNYTLGIKEQLIFPEVDYDLVDKVRGMDIVIVTTANSDEESRELLTQLGMPFQK
3	AMQ96151.1	rplW	50S ribosomal protein L23	4.3109	11034	9.8	Cytoplasmic	96	MNLLDVIKRPVITEKSMLAMDDKKYTFEVDTRANKTLVKQAVEAAFDVKVKNVNIVNVRAKFKRMGKYAGYTKKRRKAIVTLTEDSKEIQLFEAAE
4	AMQ96108.1	rpsR	30S ribosomal protein S18	2.6599	9106	10.98	Cytoplasmic	78	MAQQRRGGRKRRKVDYIAANHIEYIDYKDIELLKRFISERGKILPRRVTGTGAKNQRKITVAIKRARIMGLLPFVSED
5	AMQ96152.1	rplB	50S ribosomal protein L2	2.5494	30277	10.53	Cytoplasmic	277	MAIKKYKPTSNGRRNMTGSDFAEITTSTPEKSLLQPLKNHAGRNNNGRITVRHQGGGHKRQYRVIDFKRNKDNVVATVQTIEYDPNRSANIALVHYEDGVKAYILAPKGLEVGMKLVSGPEADIKVGNALPLENIPVGTVIHNIEMKPGKGGQLIRSAGTSAQVLGKEGKYVLIRLNSGEVRMILAACRATIGSVGNEQHELINIGKAGRSRWMRKRPTVRGSVMNPNDHPHGGGEGKAPIGRKAPVSPWGQPALGYKTRNKKAKSDKLIVRRRKNK
6	AMQ98144.1	rplA	50S ribosomal protein L1	2.1908	24521	9.27	Cytoplasmic	229	MAKKSKKMQDALKKVDSSKVYPVAEAVALAKETNIAKFDATVEVAYRLNVDPKKADQQIRGAVVLPNGTGKTQTVLVFAKGDKAKEAEAAGADFVGDDDMVQKIQNGWFDFDVVVATPDMMATVGRLGRVLGPKGLMPNPKTGTVTMDVTKAVNEVKAGKVTYRVDKAGNIHVPIGKVSFDDEKLVENFAAIHDVLLKAKPSAAKGQYMKNVTITTTFGPGIHVDQASF
7	AMQ96145.1	rpsG	30S ribosomal protein S7	2.0831	17801	9.98	Cytoplasmic	156	MPRKGPVAKRDVLPDPIYNSKLVTRLINRVMVDGKRGIAANIIYNAFDLIKESTGNDPLEVFEQAMKNVQPVLEVKARRVGGSNYQVPVEVRPERRVTLGLRWVVNYARLRGEHTMEERLAKEIMDAANNTGASVKKREDTHKMADANRAFAHYRW
8	AMQ96299.1	rplT	50S ribosomal protein L20	1.9085	13613	10.71	Cytoplasmic	119	MARVKGGTVTRKRRKRVLKLAKGYYGSKHTLFKTAKEQVMNSYNYAYRDRRQKKRDFRKLWIARINAAARMNGLSYSKLMHGLKVAEIDINRKMLADLAVNDAAAFTALADQAKEALAK
9	AMQ96212.1	rpsD	30S ribosomal protein S4	1.7842	23153	9.75	Cytoplasmic	203	MSRYTGPSWKISRRLGISLSGTGKELARRPYAPGQHGPNSRGKQSEYGMQLTEKQKLRHMYGMNERQFRNLFVKASKIKEGKHGVNFMILLEQRLDNVVYRLGLATTRRQARQLVNHGHILVDGKRVDIPSYHVEVGQVISVREKSQNIVTVKEAVEATVGRPAFVSFDAEKLEGSLTRLPERDELYPEIDEALVVEYYNQSL
10	AMQ96173.1	rpsM	30S ribosomal protein S13	1.5565	13526	10.78	Cytoplasmic	121	MARIAGVDIPRDKRVVVSLTYIYGIGNTTAKKILADAGVSEDVRVRELTNEQTDAIRAEVDKLKVEGDLRREVNLNIKRLMEIGSYRGIRHRRGLPVRGQNTKNNARTRKGPARAIAGKKK
11	AMQ96298.1	rpmI	50S ribosomal protein L35	1.5499	7809	12.66	Cytoplasmic	66	MPKQKTHRGSAKRFKRTGKGGLKRFRAFTSHRFHGKTKKQRRQLRKASMVSSGDFKRIRQQLAKMK
12	AMQ98821.1	vanA	D-alanine--D-alanine ligase (plasmid)	1.4554	37391	5.79	Cytoplasmic	343	MNRIKVAILFGGCSEEHDVSVKSAIEIAANINKEKYEPLYIGITKSGVWKMCEKPCAEWENDNCYSAVLSPDKKMHGLLVKKNHEYEINHVDVAFSALHGKSGEDGSIQGLFELSGIPFVGCDIQSSAICMDKSLTYIVAKNAGIATPAFWVINKDDRPVAATFTYPVFVKPARSGSSFGVKKVNSADELDYAIESARQYDSKILIEQAVSGCEVGCAVLGNSAALAVGEVDQIRLQYGIFRIHQEVEPEKGSENAVITVPADLSAEERGRIQETAKKIYKALGCRGLARVDMFLQDNGRIVLNEVNTLPGFTSYSRYPRMMAAAGIALPELIDRLIVLALKG
15	AMQ96683.1	rplU	50S ribosomal protein L21	1.3653	11094	9.63	Cytoplasmic	102	MYAIIKTGGKQVKVEVGQAIYVEKLDVEAGEKVVFDEVILVGGESTKVGAPTVAGATVEGTVEKHGKQKKVVTFKYKPKKHSHRKQGHRQPYTKVVIDAINA
16	AMQ97434.1	rpsB	30S ribosomal protein S2	1.3377	29312	4.93	Cytoplasmic	260	MAVISMKQLLEAGVHFGHQTRRWNPKMKKYIFTERNGIYIIDLQKTVKLVDAAYDYMKSVAEEGGVALFVGTKKQAQEAIKEEATRAGQYFVNHRWLGGTLTNWDTIQKRISRLKQINAMEEDGTFEVLPKKEVAGLNKERERLEKFLGGIADMPRIPDVMYIVDPRKERIAVQEAHKLNIPIVAMVDTNCDPDEIDVVIPSNDDAIRAVKLITSKMADAFIEGNQGEDQVVEEDFTEENTATSIEEIVDVVEGDNSSAE
18	AMQ96163.1	rpsH	30S ribosomal protein S8	1.1576	14831	9.15	Cytoplasmic	132	MVMTDPIADFLTRIRNANMVKHESLEVPASKIKRDIAEILKREGFVRDVEYIEDDKQGVIRVFLKFGKNGERVITNLKRISKPGLRAYVKADEVPKVLNGLGIAIISTSEGVVTDKEAREKNIGGEVIAYVW
19	AMQ96149.1	rplC	50S ribosomal protein L3	0.9332	22764	10.16	Cytoplasmic	209	MTKGILGKKVGMTQIFTESGELIPVTVVEATPNVVLQVKTMETDGYEAIQVGYQDMREVLSNKPAKGHVAKANTAPKRFIREFKNVELGEYEVGKEITVDVFQAGDIIDVTGTTKGKGFQGVIKRHGQSRGPMAHGSRYHRRPGSMGPVAPNRVFKNKRLAGRMGGNRVTIQNLEVVRVDAERNVILIKGNVPGAKKSLITIKSAVKAK
20	AMQ98113.1	groEL	molecular chaperone GroEL	0.9045	57149	4.66	Cytoplasmic	541	MAKELKFAEDARAAMLRGVDKLADTVKVTLGPKGRNVVLEKSYGSPLITNDGVTIAKEIELEDHFENMGAKLVSEVASKTNDIAGDGTTTATVLTQAIVREGLKNVTAGANPLGIRRGIELATKAAVEELHNISTVVDSKEAIAQVAAVSSGSDKVGHLIADAMEKVGNDGVITIEESKGIETELDVVEGMQFDRGYLSQYMVTDNDKMEAVLENPYILITDKKISNIQDILPLLEQILQQSRPLLIIADDVDGEALPTLVLNKIRGTFNVVAVKAPGFGDRRKAMLEDIAILTGGTVITDDLGLELKDVTIENLGNASKVVVDKDNTTIVEGSGEKEAIEARVQLIKNQIAETTSDFDREKLQERLAKLAGGVAVVKVGAATETELKELKLRIEDALN…
21	AMQ96155.1	rpsC	30S ribosomal protein S3	0.8863	24333	9.76	Cytoplasmic	218	MGQKVHPIGMRVGIIRDWDAKWYAEKEYAEFLHEDLRIRKFISTKLADAAVSTVEIERATGRVNISIHTAKPGMVIGKGGSEVESLRKELNKLTGKRIHINIVEIKKPDLDAKLVGEGIARQLENRVAFRRAQKQAIQRSMRAGAQGIKTQVSGRLNGADIARSEGYSEGTVPLHTLRADIDYAWEEADTTYGKLGVKVWIYRGEILPTKKNTEKGGK
23	AMQ97404.1	artM	peptide ABC transporter ATP-binding protein	0.8122	27448	4.92	Cytoplasmic	245	MAEKILVEHLVKKYGDNTVLNDINVSINEGDVVCIIGPSGSGKSTFLRCLNRLEEPSDGEIIIDGAHLMDKSTDINLVRQHIGMVFQHFNLFPHLSILENIILAPMDLKKESREEAEKKAIKLLQTVGLEDKKDMYPEMLSGGQKQRVAIARALAMNPDIMLFDEPTSALDPEMVGDVLNVMKKLAEQGMTMVIVTHEMGFAKEVANRVMFIDDGNFLEDGTPQQIFENPQNERTKDFLNKVLNI
25	AMQ97702.1	tagU	transcriptional regulator	0.7614	35339	5.8	Cytoplasmic	314	MARRRRKSRGKKIFLIILAVLIVLVLAIVGVGAKLYLDLSHSIEKTYESVERTQGERTKPVDLNKQESFSVLLMGIDTGDLGRVDQGRSDTMMVATVSPEDKQTTIVSIPRDTYVDIVGRDTKDKINHAYAFGGAAMAMDTVQKYVDIPIDHYVSINMKGLKELVDAVGGIEVNNDLTFSQDGYDFTIGKITLNGDQALSYSRMRYEDPNGDYGRQERQRKIVEGVAKKVLSLNGVSNYQSVLNALESNMKTDMSFDEMKKIALDYREAFGTIKQDQLQGEGFMQDNISYQKVSDQELDRVKKELKDQMNLENK
26	AMQ97737.1	smc	hypothetical protein AX771_09720	0.7476	58654	4.81	Cytoplasmic	522	MKERERILDLVKKGILSTEEGLDLLESMATEKDEKQIKKEADKVTASHKEKDQASQLIDKLENGEEEISEPVDPKERERQDQENLEKILDELATEANKTSARLDEVNAQFADNKAARNEKQEALMQLNTKEELGELTEEELAQRQTLEADIKELEASGDTLLEEQLKLEAELKDIRKNQWSEKKETFTDKFELPDDWKDQATDTLNQVGEKMSEAGSQLGKFLKKTFQTVSETVNDNMEWKDVSLRVPGIATTKFEHEFYYEAPAASILDIKAANGNVTLKTWDSNDVKVEAKIKLYGKMGAEPFEAFSERSQIEVNEDHISFQIPNKRVRADLVFYLPKRVYDHAAIKLLNGNIMIETLEAKDIYTKSTNGNIIVDQLTATMLEVEGVNGNIDIRNGN…
27	AMQ96144.1	rpsL	30S ribosomal protein S12	0.705	15206	11.28	Cytoplasmic	137	MPTINQLVRKPRKSKVEKSNSPALNKGYNSFKKTQTNVNSPQKRGVATRVGTMTPKKPNSALRKYARVRLSNLIEVTAYIPGIGHNLQEHSVVLLRGGRVKDLPGVRYHIVRGALDTAGVNDRKQSRSKYGTKKPKA
28	AMQ96153.1	rpsS	30S ribosomal protein S19	0.6548	10515	10.04	Cytoplasmic	92	MGRSLKKGPFVDEHLMKKVEAQAGVEKKKVIKTWSRRSTVFPSFVGYTIAVYDGRKHVPVYIQEDMVGHKLGEFAPTRTYRGHAADDKKTKR
29	AMQ97781.1	eno	enolase	0.5967	46482	4.61	Cytoplasmic	432	MSIITDVYAREILDSRGNPTIEVEVYTESGAFGRGMVPSGASTGEYEAVELRDGDKARYGGKGVTKAVDNVNNIIAEAIIGYDVRDQMAIDKAMIALDGTPNKGKLGANAILGVSIAVARAAADYLEVPLYHYLGGFNTKVLPTPMMNIINGGSHADNSIDFQEFMIMPVGAPTFKEALRMGAEVFHALASILKARGLATSVGDEGGFAPNLGSNEEGFEVIIEAIEKAGYVPGKDVVLAMDAASSEFYDKEKGVYVLADSGEGEKTTDEMIKFYEELVSKYPIISIEDGLDENDWDGFKKLTDVLGDKVQLVGDDLFVTNTQKLSEGIEKGIANSILIKVNQIGTLTETFEAIEMAKEAGYTAVVSHRSGETEDSTISDIAVATNAGQIKTGSLSRTD…
30	AMQ97714.1	rpsU	30S ribosomal protein S21	0.5956	6954	11.29	Cytoplasmic	58	MSKTVVRKNESLDDALRRFKRSVSKAGTLQESRKREFYEKPSVRRKKKSEAARKRKKF
31	AMQ98143.1	rplJ	50S ribosomal protein L10	0.5769	17763	5.21	Cytoplasmic	167	MSEAIIAKKAAIVDEVSEKFTAAASVVVVDYRGLTVDEVTRLRKQLRDANVEMKVIKNSILSRAAKKAGLEGMDEVFTGPTAVAFSNEDVVAPAKIMDEFAKEAKALEIKGGIIEGKVSSLEEITALAKLPNREGLLSMLLSVLQAPVRNVAYAVKAVADKEDGDAA
32	AMQ97748.1	ftsE	cell division ATP-binding protein FtsE	0.5106	25684	9.37	Cytoplasmic	228	MIEMKDVMKKYSNGTTAIRNLSIVIEQGEFVYVVGPSGAGKSTFIKLMYREEKASKGTLNVAGHDLIAIKNREVPYLRREIGVVFQDYKLLPRKTVYENVAYAMQVIGRKPRDIKKRVMEVLDLVGLKHKVRVFPSELSGGEQQRVSIARAIVNTPKVLIADEPTGNLDPENSWEIMKLLDRINAQGTTVVMATHNSTIVNTIRHRVIAIENGRIIRDQAEGEYGYDD
33	AMQ96159.1	rplN	50S ribosomal protein L14	0.5072	13066	10.27	Cytoplasmic	122	MIQAESRLKVADNSGAREILTIKVLGGSGRKTANIGDVIVATVKQATPGGVVKKGDVVKAVIVRTKSGARRTDGSYIKFDENAAVIIRDDKSPRGTRIFGPVARELRENNFMKIVSLAPEVL
34	AMQ97619.1	rplS	50S ribosomal protein L19	0.4967	13196	10.94	Cytoplasmic	115	MNPLIEELTKEQLRSDIPAFRPGDTVRVHAKVVEGTRERIQLFEGVVIKRRGAGISETYTVRKVSNGVGVERTFPLHTPRVAKIEVVRYGKVRRAKLYYLRALHGKAARIKEIRR
35	AMQ97094.1	yxeA	hypothetical protein AX771_05890	0.4592	13693	6.15	Cytoplasmic	123	MKVIKYLIGLAAISGILLFGLKYYTEGSYGEIPGILDQLNPLVEKGEVYVKTQKPEEVNEYGTARYVQKAADANGKERTVEFNGLSVLKENHYLKISNKGAHIETYEEVPREKVPEKALAIIG
38	AMQ96174.1	rpsK	30S ribosomal protein S11	0.4509	13727	11.28	Cytoplasmic	129	MAAKKVNRKRRVKKNIEAGIAHIHSTFNNTIIMITDTHGNALAWSSAGSLGFKGSKKSTPFAAQMAAETATKAAMEHGLKTVEVTVKGPGSGREAAIRSLQATGLEVTAIRDVTPVPHNGARPPKRRRV
39	AMQ98079.1	HMPREF1359_00603	hypothetical protein AX771_11770	0.4398	12442	6.82	Cytoplasmic	117	MVYVKKSETFKEINFLKSQQFISFTKQVDHTHAGVVNGVLPAGSVYPANDGKAEGITINDVDVSNGAQPVGVIIDGHILIERLPVKPSDAAQKAMREIKLYDASGKMIALPAAASGL
40	AMQ96843.1	fabG	beta-ketoacyl-ACP reductase	0.4271	26114	7.67	Cytoplasmic	245	MDVKGKNVFITGSTRGIGKAMALAFAKAGANIILNGRGEIPKEKIEEIEAFGVKCVGVSGDISDYEKAGQMIKEAEEKLGSIHVLVNNAGITNDKLVMRMDAEDFKKCLDINLIGTFNMTQHVLKKMMKQREGAIINLSSVSGLIGNIGQANYAASKAGVVGLTKSVAREAATRGITCNAIAPGFITTDMTEVLADKVKEQAEKQIPMQRFGQVEDIAQTAVFLAQNPYITGQVINVDGGLVMHG
41	AMQ97535.1	acrR2	TetR family transcriptional regulator	0.4194	21810	5.88	Cytoplasmic	188	MRRKVYTKDQILKAAYDVVAKEGFKGFTARNIAKKMGISTQPIYLEFKNMEDLKNTLLDSIFEQLKEDVFPIERTGDKIIDLGLNYIYFAKKHHSLYMASYIDEHGDGKKMHDFSYNYFREIVKEDERYNQLSDEYVDALHTGTWVAVTGLASLMSSNIMHPTEEQIIALIKRTIDSILALDNPEIIR
42	AMQ96164.1	rplF	50S ribosomal protein L6	0.3962	19209	9.63	Cytoplasmic	178	MSRIGNKVVVIPEGVTVTQDGNNVTVKGPKGELTRTFSADIKMNIEGNEVTFTRPNDSKEMKTIHGTTRANFNNMVVGVSEGFQKALELIGVGYRAQLQGSKLVLNVGYSHPVEITPPAGVTVEVPANTQVIVKGANKEEVGELAANIRGTRPPEPYKGKGIRYVGEYVRRKEGKTGK
45	AMQ96148.1	rpsJ	30S ribosomal protein S10	0.3824	11687	9.99	Cytoplasmic	102	MAKQKIRIRLKAYEHRILDQSADKIVETAKRTGASVSGPIPLPTERSLYTIIRATHKYKDSREQFEMRTHKRLIDIVNPTPKTVDALMKLDLPSGVNIEIKL
46	AMQ96437.1	macB	bacitracin ABC transporter ATP-binding protein	0.3735	27619	6.23	Cytoplasmic	250	MNKIVEVQNVTKVYGKNNEKKTQALSGISFDVEKGEFIGIMGASGSGKSTLLNILSTLDKPTDGHIRINQKDVTTLKGNQLADFRANEIGFIFQDFNLLESLTAQENIAVPLSLQGVRPKEIKQRVQKIAERLSISHILESYPSEISGGQKQRVAAARALITQPTILLGDEPTGALDSKSARDLLDTMDELNTKDHVSILLVTHDPFSASYCQRILFIKDGGIHQEVKRGDQSRDSFYREILSILGNLEQ
48	AMQ97180.1	msrR	Cro/Cl family transcriptional regulator	0.3608	44170	9.53	Cytoplasmic	387	MSRMDRYKDIHKKAKPLKRDTGSIFARRERKRTRMENEEDATRIYEREQHSFEHLNQYEQQIYRDAPRAEEQQKNKKFFNRQKKNKPLKPRRKRSWKKIILSILLVLILYSGISFFIGKYVAEHDTSLEAATSETFHGQKATNGAHNILILGSDTRGEDAGRADTIMVLQLDGPSHKPKLISFMRDSFVTIPGVGQNKINSAYAYGGADLVRQTLVENFGIDCQYYAKVDFKSFEKVIDALFMNGVKIDAEKDLNLDGVDIKKGVQKMDGHVLLQYARFRMDEQGDFGRVRRQQQVMNAIFSQLKNPLNLIRAPYAAGKALGYTSTDVTAWFLTKNLFSIARGAGGIDRISVPVDGSWNYGQSDYAGSILEIDNQMNQSAITDFLNK
50	AMQ96168.1	rplO	50S ribosomal protein L15	0.3487	15471	10.43	Cytoplasmic	146	MKLHELKPAEGSRQVRNRVGRGTSSGNGKTAGRGQKGQKARSGGGVRLGFEGGQTPLFRRLPKRGFTNVNRKDYAVINLDVLNRFEDGAEVTPVALVEAGIVKNEKAGIKVLANGELNKKLTVKAAKFSKAAQEAIEAAGGSIEVI
51	AMQ98310.1	recA	DNA recombination/repair protein RecA	0.3315	37491	5.11	Cytoplasmic	349	MADDRKAALDAALKKIEKSYGKGSIMKLGEKIDQQISTIPSGSLALDVALGVGGYPRGRIIEVYGPESSGKTTVALHAIAEVQKNGGTAAFIDAEHALDPQYAQKLGVNIDELLLSQPDTGEQGLEIADALVSSGAVDIVVVDSVAALVPRAEIDGEMGDSHVGLQARLMSQALRKLSGSINKTKTIAIFINQIREKVGVMFGNPEITPGGRALKFYATIRLEVRRAEQLKQGTDIVGNRTKIKVVKNKVAPPFKIAEVDVMYGLGISQEGELLDMAVEKDIVDKSGAWYSYKEDRIGQGRENAKIYMANHPEMMAEVSALVRAAYGIGEEVAVPEDEKGQEELPLVEE
52	AMQ98404.1	rpsI	30S ribosomal protein S9	0.3221	14336	10.55	Cytoplasmic	130	MAQVQYIGTGRRKNAVARVRLVPGTGKITVNKKDVEEYIPHADLREVINQPFAVTETKGAYDVFVNVNGGGYAGQSGAIRHGIARALLEVDPDFRLALKRAGLLTRDARMVERKKPGLKKARKASQFSKR
53	AMQ96156.1	rplP	50S ribosomal protein L16	0.3183	16135	10.44	Cytoplasmic	144	MLVPKRVKHRREFRGKMRGEAKGGKEVAFGEYGLQAVDSHWITNRQIEAARIAMTRYMKRGGKVWIKIFPHKSYTAKAIGVRMGSGKGAPEGWVAPVKRGKIMFEIAGVPEEVAREALRLASHKLPMKTKIVKREEMGGESNEG
54	AMQ98300.1	prs	ribose-phosphate pyrophosphokinase	0.3089	35251	8.66	Cytoplasmic	323	MSKHYFDPRLKIFALNSNRPLAEKIAAAVGVELGKSSVTQFSDGEIQVNIEESIRGSHVYVIQSTSSPVNDNLMELLIMIDALKRASAKTINVVMPYYGYARQDRKARAREPITAKLVANMIQKAGATRMLTLDLHAVQIQGFFDIPVDHLMGAPLIANYFLEKGIKGDDVVVVSPDHGGVTRARKLAEFLKSPIAIIDKRRPKANVAEVMNIIGQVKGKTCVLIDDMIDTAGTITLAANALKEAGATSVYASCTHPVLSGPALQRIEDSAIERLVVTDSIYLPEDRKIDKIDEVSVGGLMGDAIKRIHENKPVSPLFETKNK
57	AMQ96758.1	cps	phage capsid protein	0.2536	42551	5.07	Cytoplasmic	386	MTVKNLKGVTAASDQLMKAFKDGNEESFSAAMVSLSKEIQDKILEEATAKNQDQLVLMNRGQRVLTTQETKFYNEVVKNEGFAGVEELVPATVFERVFEDLEQSHPLLQKITFVNTTGVTEWIVSRGVNPAWWGKLCEAVKKVLDNGFDVINMKQFKLSGYIPVCKAMLDLGPVWLDRYVRTVLVESLRIALEQAIVDGTGKDMPVGMMRDMSKQTSGEYAEKKAEPITALDAVTMGGLMARLSKFNIEGVNDPIYRNVNPSDVVLIVNPTDYWSKVFPAKTVLTANGEYVQVLPVPVSDLQSTAVPEGKAVIGVASDYFMGVGSTLKIEASDEYHFVEDERIYLAKQYANGQPKRNDSFIVLDISALGTTTTTTKPTTTTTTTQA
58	AMQ96154.1	rplV	50S ribosomal protein L22	0.2486	12443	10.22	Cytoplasmic	115	MAEQITSAKATAKTVRTSPRKARLVIDLIRGKSVADAISILKFTPNKSAGIIEKVLMSAVANAENNFDLDVENLVVSEAFVNEGPTMKRFRPRAKGSASPINKRTSHITVVVSEK
59	AMQ96147.1	tuf	elongation factor Tu	0.2459	43198	4.79	Cytoplasmic	395	MAKEKFDRSKPHVNIGTIGHVDHGKTTLTAAITTVLSKKNGGQAMAYDQIDGAPEERERGITISTAHVEYETDTRHYAHVDCPGHADYVKNMITGAAQMDGAILVVSAADGPMPQTREHILLSRQVGVPYIVVFLNKVDMVDDEELLELVEMEVRDLLTEYEFPGDDVPVVAGSALKALEGDASYEEKILELMAAVDEYIPTPERDNDKPFMMPVEDVFSITGRGTVATGRVERGQVRVGDEVEVVGIAEETSKTTVTGVEMFRKLLDYAEAGDNIGALLRGVAREDIQRGQVLAKPGTITPHTKFSAEVYVLTKEEGGRHTPFFTNYRPQFYFRTTDVTGVVELPEGTEMVMPGDNVTMEVELIHPIAIENGTKFSIREGGRTVGAGVVTEIKA
60	AMQ97740.1	phoU	PhoU family transcriptional regulator	0.2431	26041	5.23	Cytoplasmic	225	MLRTQFEEELLNLHNQFYEMGMMVSSAVHKSVRAYIKHDKILAQEVIENDININNMETRLEKKSFEMIALQQPVTTDLRMIITVMKASSDLERMADHAVSVAKSTIRVKGQTRIPEIEKEISDMSDYVKKMVDNVLVAYVKTDEKDARTIANMDQRVNDYFNRIYNATIKNMQENPETVISGTDYLNVASYLERIGDYVTNICEWIVYLATGKITELNTNHNEIF
61	AMQ96238.1	rpsO	30S ribosomal protein S15	0.2431	10616	10.12	Cytoplasmic	89	MAISKERKNEIINEYARHEGDTGSPEVQIAVLTEEINHLNEHARVHKKDHHSYRGLMKKVGHRRNLLAYLRKTDVQRYRELIKRLGLRR
62	AMQ97741.1	pstB	phosphate ABC transporter ATP-binding protein	0.2381	28356	6.14	Cytoplasmic	252	MTKEIISSKDLHLYYGKKEALKGIDLSFNQGEITAMIGPSGCGKSTYLRSLNRMNDLIPNVTITGSVLYKDKDIYGPKTDVVELRKEIGMVFQQPNPFPFSIYENVIYGLKLKGEKDKKVLDQVVEESLKAASVWDDVKDKLHKSALSLSGGQQQRVCIARVLAVNPEIILLDEPTSALDPVSTGKIESMLLELRERYTMIIVTHNMSQASRISDKTAFFLDGHLIEYNDTKKIFMNPEKQETEDYISGRFG
64	AMQ96480.1	fhuC	manganese ABC transporter ATP-binding protein	0.2183	27537	9.5	Cytoplasmic	248	MERTAIVIQDLSAAYQGKTVLKTINLTINPQKITGIIGPNGAGKSTFMKSLLELIPATTGKVTFSGQSVNSVRKKIAYVEQRSELDLSFPIDVLGVVLLGTYPSLRIGQRPGKKEKERARQALKKVGMEEYAKRQISELSGGQLQRVFIARALAQGAEWIFLDEPFVGIDALSERKIFDILQELKNSGKTILIVHHDLHKVEEYFDEVILLNKQLIASGPVQEVFTSKNLQLAYGEIIRHLVKGGEKK
66	AMQ98797.1	ermB	SAM-dependent methyltransferase (plasmid)	0.2011	28751	9.8	Cytoplasmic	245	MNKNIKYSQNFLTSEKVLNQIIKQLNLKETDTVYEIGTGKGHLTTKLAKISKQVTSIELDSHLFNLSSEKLKLNIRVTLIHQDILQFQFPNKQRYKIVGSIPYHLSTQIIKKVVFESHASDIYLIVEEGFYKRTLDIHRTLGLLLHTQVSIQQLLKLPAECFHPKPKVNSVLIKLTRHTTDVPDKYWKLYTYFVSKWVNREYRQLFTKNQFHQAMKHAKVNNLSTVTYEQVLSIFNSYLLFNGRK
67	AMQ97161.1	pyrR	bifunctional pyr operon transcriptional regulator/uracil phosphoribosyltransferase	0.1984	20479	4.91	Cytoplasmic	179	MQAKEVVDQVTMKRALTRITYEIIERNHSIQDIVLVGIKTRGIYIASRIAERLKQLEDIDIPVGELDITLYRDDKKENPEEPELHSSDIPVSLEGKEVILIDDVLYTGRTIRAAMDAVMDFGRPRKISLAVLVDRGHRELPIRADYVGKNIPTSRAEEILVEMQELDGQDRIMILKEED
68	AMQ98129.1	AWT83_01495	glycine betaine/L-proline ABC transporter ATP-binding protein	0.1928	44485	5.14	Cytoplasmic	397	MVKVEVKHLTKIFGKKTQAALDMMNDHQPKTEILKKTGATVGVYDVNFDVKEGEIFVIMGLSGSGKSTLIRLLNRLIEPTSGSIYIDGEDVSKLSKEELREVRRHKINMVFQNFGLFPHRTILENTEYGLEVRGVPKEERQEKAEKALENSSLLSFKDQYPSQLSGGMQQRVGLARALANDPEILLMDEAFSALDPLIRREMQDELLDLQANVQKTIIFITHDLNEALRIGDRIALMKDGEIMQIGTGEEILTNPANDYVREFVEEVDRSKVLTAQNIMVPALTTNIESDGPNVALTRMRNEEVSMLMAVDRKRHLKGIITADQALEARKQKRPLIDFLDENVTVIGKDMVVSDIFNIIYDSPTPLAVVEDGKLKGVVIRGSVIEALAETSEVSEHE
69	AMQ96539.1	metN	methionine ABC transporter ATP-binding protein	0.1917	38158	7.68	Cytoplasmic	344	MSLIQLTNVKKTFNGKNGNIQAVNDVSLNVEKGDIYGIVGYSGAGKSTLVRLLNGLELPTSGEVIVNDQDITKLKNKELRTFRKKIGMIFQHFNLLWSRTVLENIQLPLELAGVPKSKRKERAEELLRLVGLEGRGQAYPSQLSGGQKQRVGIARALANDPEILLCDEATSALDPQTTEEVLDLLLAINKKLNLTIVLITHEMNVIRKICNKVAVMELGKVVEEGDVLTVFRQPKKEVTKRFVQQDIEPEADSTELLAELIKENPSGRLATLTFSERNANEPVISQAIRRYNIDVNVVYGKIKQVKEGSFGSLTVLMTGETKELDQAEVFIKEQGVGIEVIHRG
72	AMQ97058.1	pdhC	dihydrolipoamide acetyltransferase	0.1768	57939	4.72	Cytoplasmic	547	MAYQFKLPDIGEGIAEGEIVKWFVKPGDTINEDDTLLEVQNDKSVEEIPSPVTGTVKNVIVPEGTVANVGDVLVEIDAPGHEDNEGDSGVAAESQTPAKPAAEPTVDTESAGSSSEGVFQFKLPDIGEGIAEGEIVKWFVKPGDTINEDDTLLEVQNDKSVEEIPSPVTGTVKNVIVPEGTVANVGDVLVEIDAPGHNSAPSTSAPSAEAPKEKVETSGSASVVEAADPNKRVLAMPSVRQFAREKDVDISQVTATGKGGRVTKEDIENFLAGGPSSAPAKSEAPEAAAPKEAAPAAESKPAAPAKPFKSNLGDLEERVAMTPTRKAIAKAMVNSKHTAPHVTLHDEVEVSKLWDNRKRFKEVAAANGTKLTFLPYVVKALTATVKKYPVLNASIDDAN…
77	AMQ96713.1	divIVA	cell division protein DivIVA	0.1713	26712	4.6	Cytoplasmic	235	MALTPLDIQNKTFPTKMRGYNQDEVDDFLDLVVRDYEELTQRNRELEKAVKHSEEKLEYFNELKDALNQSIIVAQDTADKVKTSASKESEVIVTSAQNKADELVANAEKRAHQLTTDAEEKARKILTDATEKARQLATETEDLKKKTRVFHQRISLMLESQLEQVKSPEWDEILQPFSSYVTDSHEVIKEVLAKQLDNENDTDVNSDTGVIEAPMTAFDTQAIDISIVPGENENE
78	AMQ96165.1	rplR	50S ribosomal protein L18	0.1696	12972	10.18	Cytoplasmic	118	MITKPDKNKTRQKRHRRVRNNISGTAERPRLNVFRSNKNIYAQIIDDVAGVTLASASTLDKEISGGTKTEAAQAVGKLVAERAAEKGIKVVVFDRGGYLYHGRVQALAEAARENGLEF
80	AMQ96868.1	pfkA	ATP-dependent 6-phosphofructokinase	0.1663	34191	5.34	Cytoplasmic	320	MKRIGILTSGGDAPGMNAAVRAVVRKGIYEGLEVYGINYGFAGLVAGDIRRLDVADVGDKIQRGGTFLYSARYPEFATEEGQLKGIEQLKKFGIEGLVVIGGDGSYHGAMALTKRGFPAVGIPGTIDNDIPGTDFTIGFDTAINTVLESIDRIRDTATSHVRTFVIEVMGRNAGDIALWSGVAGGADEIIIPEHDFDMASVAKKIQEGRDRGKKHCLIILAEGVMGGNEFAEKLSEFGDYHTRVSILGHVVRGGAPSARDRVLASKFGAYAVELLQEGKGGLCVGIHDNEIVASDIIDTLENNKHKPDLSLYDLNNSLSF
82	AMQ96150.1	rplD	50S ribosomal protein L4	0.1658	22530	9.99	Cytoplasmic	207	MPNVALFKQDGSQNGEITLNEEIFGIEPNESVVYDAIVMQRASLRQGTHAVKNRSAVRGGGRKPWRQKGTGRARQGSIRSPQWRGGGVVFGPTPRSYSYKLPKKVRRLAMKSVLSEKVAENNLVAIEGLNFDAPKTKEFKQVLANLSIDSKVLVVLEKGNDFAALSARNLPNVSVVTSDNVSVLDVVSNTKVLATQTALTQIEEVLA
84	AMQ96309.1	pepA	glutamyl aminopeptidase	0.1624	39448	5.2	Cytoplasmic	359	MEEKTFQRIKELTELQGTSGFEQDVRAYMESHMEPLVDELQLDGLGGIFGLRHHEEADAPRVMVAAHMDEVGFMLTQIQENGLFKVVPLGGWNPYVVSAQRFTLKTSTGKNYPCISSSVPPHLLRGTSGQKSVEVTDILFDAGFESREEAMSYGVLPGDTIVPYAETIKTANGKNIISKSWDNRYGCTMVLEALEALQNETLGHTLIAGANVQEEVGLRGSKASVNKFKPDLFFAVDCSAADDTVTKNGTFGHLGEGTLMRIQDPGLIMLPRLREYLLDIAETNNIPYQYFVSKGGTDAGAAHTQNEGIPSTVIGVVGRYIHTHQTMFSIRDFEAAREMLIQTLKGLDKSTVNTIVYGK
86	AMQ96257.1	cshA	DEAD/DEAH box helicase	0.1613	56196	9.49	Cytoplasmic	503	MKFKELELSPELLKSVERAGFEEATPIQAETIPLALAGKDVIGQAQTGTGKTAAFGLPMLEKIDPDRHELQGLVIAPTRELAIQTQEELYRLGRDKKVRVQAVYGGADIGRQIRGLKDRPHIVVGTPGRMLDHINRHTLKLGTVQTLVLDEADEMLNMGFLEDIEKIISQVPDQRQTLLFSATMPPAIKNIGVKFMKNPHHVKIKAKEMTADLIDQYYVRAKEYEKFDIMTRLFDVQTPELTIVFGRTKRRVDELARGLEARGYRAEGIHGDLSQQKRMSVLRSFKSGHLDILVATDVAARGLDISGVTHVYNYDIPQDPESYVHRIGRTGRAGKGGMSVTFVTPNEMDYLHVIENLTKKRMTTLRPPTEKEAFKGQLGAAVEQIETKLAENGLDKYLQ…
91	AMQ97784.1	gap	glyceraldehyde-3-phosphate dehydrogenase	0.1536	35741	5.26	Cytoplasmic	333	MTVKVGINGFGRIGRLAFRRIQDVDGIEVVAINDLTDAKMLAHLLKYDTTQGRFNGTVEVHEGSFNVNGKEVKVLANRNPEELPWGELGVDIVLECTGFFTSKSAAEKHLTAGAKRVVISAPGGNDVPTIVYNTNHETLTGKETVISGASCTTNCLAPMAKTLNDKFGVVEGLMTTIHAYTGDQMTLDGPHPKGDFRRARAAAANIVPNSTGAAKAIGLVIPELNGKLDGAAQRVPVPTGSLTELVTVLEKEVTVDEINAAMKEASNESYGYNTDEIVSSDIVGMTYGSLFDATQTKVMTVGDKQLVKTVAWYDNEMSYTAQLVRTLEYFANL
92	AMQ98405.1	rplM	50S ribosomal protein L13	0.1519	16311	9.95	Cytoplasmic	147	MRTTYMAKPGEVERKWYVVDATDVPLGRLSTVVASVLRGKNKPTFTPHLDTGDFVIVINADKVKLTGKKATDKIYYRHSNYPGGLKSITAGELRAKNSRRLIETSVKGMLPKNTLGRKQFTKLNVYGGAEHPHAAQQPEVLDITNLI
94	AMQ96943.1	sigA	RNA polymerase subunit sigma	0.1459	41855	5.23	Cytoplasmic	369	MANGTDKKTYEAAVAAFIKENKPKRQVVYDDLSNQLATPFTLNADEMDKLIQKIEDAGISVVDENGDPSIHSLKSAEKKAEQAKTEDLSAPTGVKINDPVRMYLKEIGRVSLLTAEEEVALALKIEEGDQEAKQRLAEANLRLVVSIAKRYVGRGMQFLDLIQEGNMGLMKAVEKFDYRKGFKFSTYATWWIRQAITRAIADQARTIRIPVHMVETINKLIRIQRQLLQDLGREPTPEEIGAEMDLPTEKVREILKIAQEPVSLETPIGEEDDSHLGDFIEDQEATSPAEHAAYELLKEQLEDVLDTLTDREENVLRLRFGLDDGRTRTLEEVGKVFGVTRERIRQIEAKALRKLRHPSRSKQLKDFLE
95	AMQ97731.1	galU	UTP--glucose-1-phosphate uridylyltransferase	0.1437	34653	5.33	Cytoplasmic	312	MKVKKAVIPAAGLGTRFLPATKAMAKEMLPIVDKPTIQFIVEEALKSGIEDILIVTGKAKRPIEDHFDSNIELETNLSEKGKTELLKLVEETTDVNLHFIRQSHPKGLGHAVLQARAFIGNEPFVVMLGDDIMEDEVPLTQQLIDDYERTHASTIAVMQVPHDETSKYGIINPGEVLEDGLYNVKNFVEKPDPSKAPSDLAIIGRYLLTPEIFDVLSEQQPGAGNEIQLTDAIDTLNKTQRVFARKFTGKRYDVGDKFGFMKTSIEYGLTHPEVGAPLREYILSLGKTLEAEGSKIDHNPKGITEIKEEKKK
96	AMQ96851.1	yhbY	RNA-binding protein	0.1437	11778	9.3	Cytoplasmic	103	MSLRGKQKRFLRSKAHHLQPIFQIGKGGINSAMIVQIEEALEKRELIKVSLLQNTDEIAEEAAQVLEKEIDCEIVQIIGRVIVLYKPSTKEKYQRLSKEVKAI
98	AMQ97742.1	pstB	phosphate ABC transporter ATP-binding protein	0.1376	30311	6.92	Cytoplasmic	268	MKKYNWNETNVITMPKEKEVALYTDDLHVWYGDNEAIKGVDLEFEKNKITALIGPSGCGKSTYLRSLNRMNDGIANTKITGKIMYQGVDINAPQVDVYEMRKRIGMVFQRPNPFSKSIYDNITFALKQHGEKNKKKLDEIVETSLKQAALWDQVKDSLDKSALALSGGQQQRLCIARAIAMKPDILLLDEPASALDPISTGTVEETLVNLKEDYTIIIVTHNMQQAARISDYTAFFYLGKVMEYDKTNKIFTRPKIQATEDYVSGHFG
100	AMQ96790.1	rmlB	dTDP-glucose 4,6-dehydratase	0.1359	38447	5.2	Cytoplasmic	342	MKNIIVTGGAGFIGSNFVHYVVNNHPEVHVTVLDKLTYAGNKENLAGLPSDRVELVVGDVADAELVDRLVKEADAVVHYAAESHNDNSLKDPFPFVQTNIIGTYTLLEACRKYDVRYHHVSTDEVYGDLPLREDLPGHGEGEGEKFTAETPYNPSSPYSSTKAGSDLLVKAWVRSFGLRATISNCSNNYGPYQHIEKFIPRQVTSILSGIRPKLYGEGKNVRDWIHTNDHSSAVWLILTKGRIGETYLIGADGEEDNKTVMELILEMMGQPKDAYDHVNDRAGHDLRYAIDSTKLREELGWQPEFTNFRDGLADTIKWYEEHEDWWKKEKEAVEAAYAKNGQ
103	AMQ96191.1	ftsY	signal recognition particle-docking protein FtsY	0.1304	36611	4.79	Cytoplasmic	332	MGFFDKIKRAFTGEEKTEEVEVQEKYDKGLEKTRKTFGERMNELFANFRTVDEDFFEELEETLIGADVGFETAIRITEALRQEVKLRNAKKSAEVQNAIIEKLVDLYEAEGINEVNELNIQEDGLTVILFVGVNGVGKTTSIGKLAHQFKNEGKKVLMAAADTFRAGAIDQLVVWGERAGVEVVRGNAGGDPAAVVFDALERAKTEQADVLLVDTAGRLQNKVNLMNELEKIKRVIQRELPEAPQETLLVLDATTGQNAMVQAKQFKETTDVTGLVLTKLDGTAKGGIVLAIRNELHLPVKLVGLGEGIDDLEPFDPNDFVVGLFKGLLKEE
105	AMQ97432.1	pyrH	UMP kinase	0.1298	25941	5.66	Cytoplasmic	240	MVTPKYQRVVLKLSGEALAGDAGFGIKPPVIKEIIQEIKEVHELGVEMAIVVGGGNIWRGQIGAQMGMERAQADYMGMLATVMNALALQDTLENVGVPTRVQTSIEMRQIAEPYIRRKAERHLEKGRIVIFAGGTGNPYFSTDTTAALRAAEIGADVILMAKNNVDGVYSADPKVDANAVKFEELTHLEVIAKGLQVMDSTASSLSMDNDIPLLVFNLNEHGNIRRAILGENIGTTVRGK
106	AMQ98330.1	proA	gamma-glutamyl-phosphate reductase	0.126	45609	5.05	Cytoplasmic	415	MTDLMQLGQQAKDSAQQLALMPTNRKNELLVQMAQTIKKNQQAIIEANHKDLEKAVENNISETMQDRLQLTPERINAMATEIEKIASLDDPIGKVDEMWTNTDGLRIGKKRVPLGVTGIIYESRPNVTTDAASLAFKSGNAVILRGGKEAFFSNQLLVQLLQQVLVSAGESPYAIQFVDDTSHETAGQLMRLTEYLDVLIPRGGAKLIQRVKEQATVPIIETGTGNNHVYIDKEAQLSMAVNIIVNAKASRPSVCNAAETLLIHSEIAPFFLPAIEKELVEHGVSLRADARALEYLETAALAEDTDWDTEYLDYILAVKVVDSLDEAIAHINRHNTKHSETIVTDSYAASQRFLNEVDAAAVYVNASTRFTDGSVFGFGAEIGISTQKLHARGPMGLNE…
108	AMQ98706.1	AWT83_16455	multidrug ABC transporter ATP-binding protein (plasmid)	0.1227	24059	9.3	Cytoplasmic	218	MDILEIKNVAYSYANSKEKVLSGVNQKFELGKFYAIVGKSGTGKSTLLSLLAGLDKPQTGKILFKNEDIQNKGYSNHRKNNISLVFQNYNLIDYLSPIENIRLVNKSADESILFELGLDKKQIKRNVMKLSGGQQQRVAIARALVSDAPIILADEPTGNLDSVTAGEIINILKTLAKDRNKCVIVVTHSKEVADSADIILELSGKKLKKVNKMNLEVE
109	AMQ96934.1	AS238_06165	hypothetical protein AX771_04955	0.1227	26847	5.76	Cytoplasmic	234	MKKKQKQKLLNQFRPSLDGVRGQLFRSLEEESLRRYGLPLQVMLDPKNRQILTIGLAGKTNEDTRINVPIDDNFNTVLKRIRSGENGIFERFRDNLLIEIVSYWNDQRLKNDEPTAQAVATPVTEETVSVPEEKTEKPKADTTENTRSTDTNAALSFADFSKAVAEYPKFYTEQNEHEVVINEKNADEPRKLATISMTTENEFVIEKALERKYKVKLTLIPLIEQFAATAITDR
110	AMQ96175.1	rpoA	DNA-directed RNA polymerase subunit alpha	0.1227	35148	4.99	Cytoplasmic	312	MIEFEKPRIAKIDEEKDYGKFIVEPLERGYGTTLGNSLRRILLSSLPGAAITNIQIDGVLHEFSTIKGVREDVTQIILNIKGLALKMYGQEEKTLEIDITGPATVTAGDIIVDSDVEILNKDMYICSVSEGATFHARLTVKPGRGYVQADENKKEDMPIGVLPVDSIYTPVRRVNYQVENTRVGHREDFDKLTMEIWTDGSIEPLEAMSLSAKIMTEHLDIFVNLTDEAKNAEIMVEKEETQKEKMLEMTIEELDLSVRSYNCLKRAGINTVQELTNKSEPEMIKVRNLGRKSLEEVKAKLHDLGLGLRKED
111	AMQ97141.1	gpsB	cell division protein DivIVA	0.1227	15792	5.09	Cytoplasmic	139	MANLVYSPKDILQQEFKTKMRGYDPVEVDEFLDNIIKDYETYSKELLALQEENDRLSAKVAQLSKTQGAAQTRVQQTEAPKSAAVTNFDILKRLSNLEREVFGKKLDQQASAVKPAQPNPNNYTNADTSLDDNEKTRQF
112	AMQ96158.1	rpsQ	30S ribosomal protein S17	0.1227	10245	9.93	Cytoplasmic	88	MTEGRNQRKVYQGRVVSDKMDKTITVAVETKKNHPIYGKRMNYSKKYKVHDENNTAKVGDIVRIMETRPLSATKRFRLLEVVEEAVII
114	AMQ97057.1	pdhB	2-oxoisovalerate dehydrogenase	0.121	35494	4.62	Cytoplasmic	325	MAQKTMIQAITDALALELENDENVVVFGEDVGKNGGVFRATEGLQEKFGEDRVFDTPLAESGIAGLSFGLALEGFRPVPEIQFFGFIFEAMDEVVAQMARTRYRMSGTRNLPITIRSPFGGGVHTPELHSDNLEGLIAQSPGIRVVIPSNPYDAKGLLISSIRSNDPVVFLEHMKLYRSFREEVPDEAYEVPLDKAAVTREGTDVSIITYGAMVREAIKAADNLAKENISVEIIDLRTVAPLDVETIIQSVEKTGRVVVVQEAQRQAGVAAQVVSEISERAILSLEAPIGRVSAPDTVFPFGQAENVWLPNAKDIEDKVKEIAEF
117	AMQ97376.1	engB	GTP-binding protein	0.1149	22146	9.34	Cytoplasmic	195	MKVHQAEIIISAVAPKQYPDTQLPEIALAGRSNVGKSSFINTLIDRKNLARTSGKPGKTQTLNFYLIENALHFVDVPGYGYAKVSKTERAKWGKMIETYLTTRDQLRAVVSLVDLRHKPSQEDIQMYQFLKYYDIPVIVVATKADKIPRGKWNKHESEIKKALDFDRNDTFILFSSVTKQGKEEAWAAIEQAIES
118	AMQ96135.1	yufO	heme ABC transporter ATP-binding protein	0.1127	57478	5.88	Cytoplasmic	520	MVQENIVIEMQNITKEFGTFKANDNINLQVKAGEIHALLGENGAGKSTLMNVLSGLLEPTSGKILMRGKEVKITSPTKANQLGIGMVHQHFMLVDAFTVTENIVLGSEPSRAGMLDHKKARKEIQKVSEQYGLSVNPDAYVRDISVGMEQRVEILKTLYRGADVLIFDEPTAVLTPQEIDELIVIMKELVKEGKSIILITHKLDEIKAVADRCTVIRRGKGIGTVNVKDVTSQQLADMMVGRTVSFKTMKKEAKPQEVVLSIENLVVKENRGLEAVKNLNLEVRAGEVLGIAGIDGNGQSELIQALTGLRKAESGHIKLKGEDITNKKPRKITEHGVGHVPEDRHKYGLVLDMTLSENIALQTYHQKPYSKNGMLNYSVMNEHARELIEEYDVRTTNEL…
120	AMQ98433.1	apbE	thiamine biosynthesis protein ApbE	0.1089	40856	5.3	Cytoplasmic	367	MRKKLLFSLITLGISFMVLTGCSNSANKTTTESSAATKILKDPYSDEQFLLGTYVRIRVYDEGKESTLKPAFDRVKELGDKITINQKGSEIDEVNEQAGIKPVKVSDDVYTLVKRAYEYSQDSQGGFDMAIGAITQLWRIGFDDARKPSQEEIDQALKLVDYHKIELNDKEKTVYLKEKGMIIDLGAIAKGYITDEVVKVLKKQGVTTAIVDLGGNVYVLGHSPRGENQDWTVGIQDPNMARGSVLGSIKERNKTLVTSGIYERYLEVDGKKYHHLFDPKTGYPFDNDIASVTIITDKSIDGDGLSTAVFSMGVKKGLEYVESELNNGTEAIFVTKDDKVYVTDPIKDTFKLSEDSHYTMGDRSELK
121	AMQ97056.1	pdhA	pyruvate dehydrogenase (acetyl-transferring) E1 component subunit alpha	0.1089	40872	5.45	Cytoplasmic	369	MANKKAPIDFQALLDEVNADFPVYQALDQDGNVVNKDLVPDLSDDELVELMTHMVWSRVLDQRSTALNRQGRLGFFAPTAGQEASQLASAYAFDKEDVLLPGYRDVPQLVKHGLPLSQAFLWSRGHAAGNSYPEELKALPPQIIIGAQYVQAAGVALGLKKRNKKNVVFTYTGDGGSSQGDFYEAINFAGAYHANAVFYIQNNGYAISTPREKQTAAKTLAQKAVAAGIPGIQVDGMDPLAVYTVSKMAREWAISGNGPVLIETLTYRYGPHTLSGDDPTRYRTKDTDDDWQKKDPLIRFRKYLTEKGLWSEEKEEQVIEATKEEIKAAIAEADKVPKQKVSDFLKNMFEVSPQSIKEQIAIYEAKESK
122	AMQ97703.1	HMPREF1359_01862	hypothetical protein AX771_09520	0.1089	28970	5.23	Cytoplasmic	259	MEKPFVKSLTAVAVGAGAIAICLFGYHINNQRQHQQRINYAESAITNQKDTLTSLSKEVDKLYSTKEKIFLNPEITEETITSLSNKLSSVKLSADDYDIKESELPKEAVAIQDEKKAIVTQLDSAESKLKIQTAVNDLFTKNVSNWQQAVDDVIIKEKVTSADVARVRENMSFFKDSPWKTVVMQYLGFADTQIAQVTQLDQLFDTMLKDGQVTATATYDQYLTALSQIEQIRNEKISAAYATKAQTVAQQMGYSNISY
124	AMQ96951.1	rsuA	pseudouridine synthase	0.1039	26742	9.62	Cytoplasmic	238	MERLQKVIAHAGITSRRKAEEFILAGRVKVNGQVVRELGIKVGKHDTVEVDEVPIYQEEYGYYLLYKPKGVISAVADDKGRKVVTDLLPMVKERIYPVGRLDYDTSGILLLTNDGDFAQRLTHPKHEVDKVYVAKVKGIATKSMLAPLTKGIKIEGRKTSPAKFQILSVDPKTNHSIVELTIHEGRNHQVKNMLQAVGLPVQKLKREKYGDLTLQGLRPGDYRELNKKEVSSLLNHSK
129	AMQ96842.1	fabD	ACP S-malonyltransferase	0.1011	33399	5.15	Cytoplasmic	305	MKTAFLFSGQGAQYQGMGKDLYEEAVVKQTFDEASEILGYDMAELCFTENERLDQTQYTQPAILTVSIAYYRLLKEHGIIPDAALGLSLGEYSALVASNALSFTEAVALVAKRGAYMTEATPAGSGKMVAVMNAPIETIEESCHEASKYGIVSPANYNTPQQIVIGGEEKAVDEAVLLLKEKGFKRMIPLNVSGPFHTAILEPAAKKLAKDLSQIQFSEPSFPIISNTTTEIMKKETIAGLLEQQVMQPVRFYESIHKLKTIGIEQVIEVGPGKVLSGFMKKIDKTIPVLRVENKQTFDETIAIL
131	AMQ96841.1	acpP	acyl carrier protein	0.0995	8558	3.87	Cytoplasmic	74	MVFEKIQEIIAEELGKETEEIKLTTDIQEDLEADSLDLFQIINEIEDEFDVKIETEDGIKTVQDLVTYVEKQTA
133	AMQ97736.1	AS238_07685	PspC family transcriptional regulator	0.0961	12021	9.33	Cytoplasmic	105	MKKKLTKSNKNVVLTGTLAGIGEYIGIDPTVIRVLYVFLSLVAFGSPIILYILLALIIPSARSARTNYGHNNAYYEKNNYREQTREQTKKRKEAEKIDDDEWSDF
134	AMQ96709.1	ftsZ	cell division protein FtsZ	0.0961	44306	4.69	Cytoplasmic	413	MEFSIDNNINDGAVIKVIGVGGGGGNAVNRMIEENVKGVEFITANTDVQALKNSKAETVIQLGPKYTRGLGAGSQPEVGQKAAEESEQSLREALDGADMIFITAGMGGGTGTGAAPIVAGIAKELGALTVGVVTRPFTFEGPKRGRFAAEGIARLKENVDTLLIISNNRLLEVVDKKTPMLEAFREADNVLRQGVQGISDLITAPGYVNLDFADVKTVMENQGTALMGIGVASGEDRVVEATKKAISSPLLETSIDGAEQVLLNITGGLDMTLFEAQDASDIVANAATGDVNIILGTSINEEMGDEIRVTVIATGIDESKKERKSSRPARQAQMQSPAQKTVLDMDQAKPTSSEEENSFGDWDIRREQNVRPRVDDSNFDNIEKKEFDTFNREETKSHG…
135	AMQ96629.1	potA	spermidine/putrescine ABC transporter ATP-binding protein	0.0956	41142	4.85	Cytoplasmic	361	MGKPIISFDQVVKRYDDETVLKKVSFEIEQGKFYTLLGPSGCGKTTILRIIAGFTEATEGDIYFEGKRLNDLPANKRQVNTVFQDYALFPHMNVFDNVAFGLKIKKMSKSDIEKKVKDALRMVQLPGYEKREISEMSGGQRQRVAIARAIVNEPKVLLLDEPLSALDLKLRTDMQYELRDLQQRLGITFIFVTHDQEEALAMSDEIFVMNKGKIVQSGTPVDIYDEPINHFVADFVGESNIVDGVMIEDNLVEFVGKQFECVDGGMRLNEPVEVVLRPEDLTITTPDKGKLVVTVDTQLFRGVHYEIICYDEQQNEWMVHSTKKAKEGSKVGLAFEPEDIHVMRFNESEEEFDARLDSYEE
139	AMQ97401.1	AS238_11630	carboxylate--amine ligase	0.0901	49549	5.33	Cytoplasmic	421	MMNSIENEEFIPILLGSDMNVYGMARSFNEAYGKICQAYASDQLAPTRYSKIVNVEVIPGFDKDPVFIETMLRLAKERYSDKSKKYLLIACGDGYAELISQHKQELSEYFICPYIDYSLFERLINKVSFYEVCEEYDLPYPKTLIVREEMLVNGHLEQELPFEFPVALKPANSVEYLSVQFEGRKKAFILETREEFDLILGRIYEAGYKSEMIVQDFIPGDDSNMRVLNAYVDEDHQVRMMCLGHPLLEDPTPASIGNYVVIMPDYNEKIYQTIKAFLEKIEYTGFANFDMKYDPRDGEYKLFEINLRQGRSSFFVTLNGLNLARFVTEDRVFNKPFVETTYGTNQSDKARLWMGVPKKIFLEYARENEDKKLAEQMIKENRYGTTVFYEKDRSIKRWL…
140	AMQ98006.1	upp	uracil phosphoribosyltransferase	0.0884	22917	4.98	Cytoplasmic	209	MGKFQVIDHPLIQHKLTIIRDKNCGTKVFREVVDEIAMLMAYEVSRDMPLEDIVIETPITETTQKTLSGKKVAIIPILRAGIGMVDGILELIPAAKVGHIGLYRDEETLEPHEYFVKLPEDIDARQLFVVDPMLATGGSAIMAIDALKERGASNIKFVCLVAAPEGVKALQEAHPDIDIYTASLDEKLNEHGYIVPGLGDAGDRLFGTK
142	AMQ97449.1	A5810_000889	hypothetical protein AX771_07960	0.0862	5939	10.21	Cytoplasmic	55	MKKFVSGILVGSLATAAAVAGLVASVKKTVIDPIDEKEAMIEENRKKAMRKRVSR
143	AMQ96976.1	A5836_002410	lipase	0.0856	33806	5.29	Cytoplasmic	298	MKLTKRHLILVLFPLLIAIIIYAGLAASIPKAGPLMKPVTTVREDPNKKEKLHYIAIGDSLTEGVGDQTKQGGFVPLVANDLKDRYNLTAVETENYGVNGERSDQILKRVKTKEEIRNNIKTADFITLTVGGNDLMKVIQNNLFGLTVNSFKKPLKNYQENVTELLEEFRSLNKTAPIYILGIYNPFYLNFPEITDMQTIVNNWNKGTETVTKKMPNCYFIPINDLLYQGLNQEVGVTEEGTDQTTSTTENLNGIKNNVLYEEDHFHPNNLGYQLMANAVRDQLIETQNQWLEKEDDQ
145	AMQ96515.1	telA	tellurite resistance protein TelA	0.0834	45067	4.97	Cytoplasmic	398	MDHKPTETKDVTPVNDTLEDLLNNPFSTPTDTLTTSQQAEIDQLQEQQTAARLIDKLPAERQEQAKQLAAKIDANDAQSVISYGSAAQAKLSEFSQSMLNHVQAQDIGPVGDSLTELMYRLQEANPDELRAGEGNIFQRVFGKVKQSIYEVTAKYQKIGAQIDKISVKLDKEKDGLLKDNLMLEQLYQKNKDYFDALNIYIAAGELKMEELQTTIIPEAMKRAEETGDQMDVQIANDYTQFLDRLDKRTHDLRLARQITIQQAPQIRLIQNTNQALAEKIQASIATAIPLWKNQVVIALTLLRQKDAVTAQRQVSETTNDLLKKNSEMLKISAIETAKENERGIVDIETLQTTQNDLIETIQETLRIQKEGKEKRRHAEVELGHMEEDLKQKLLDLTQ
150	AMQ96436.1	AS238_04670	amino acid ABC transporter ATP-binding protein	0.0818	13485	9.38	Cytoplasmic	120	MKKLLIGLLVFIVVVLAGVKIADYVVMGGEEYYVQITTDGTKTVSKSDSGQETVNYRYILPGYTKEGKEKELDFKGQLTRPLRKGAYLKITWNKNKGVTSYEEVEKKDVPKTALEKLIKG
151	AMQ97857.1	rex	redox-sensing transcriptional repressor Rex	0.0807	24363	5.43	Cytoplasmic	218	MKDHIIPKATAKRLPLYYRYLRILNNAGKKKVSSTELSEAVQVDSATIRRDFSYFGELGKRGYGYDVEDLMHFFAKTLNDDQLTNVALIGVGNLGSALLKYKFHQSNSIRISCAFDVNEEIVGRIVDGIPVYPMEDMSEQIKIQQIEVAILTIPAERAQEVVNQLTEAGIKGILNFTAARLNAPSDVLIQNVDLTNELQTLIYFLHSDANAHSENTAE
152	AMQ97550.1	aroD	dehydroquinase	0.0807	27972	5.45	Cytoplasmic	252	MVRVKGLNIGSGRPKICAPLIGAVREEVLREAVLAREAGADLVEWRVDHYREVFSFDEVAETLVLIHEMLDGLPLLFTFRTLAEGGEQDISIRQYRDLYEHVIHTGLVDMVDIELFKVESLGKRLIEEIKSLNIPLIISSHDFKETPADPVLLYRLNVMEHFGADIGKLAVTPNNERDVLRLMELTRRANAFVSMPIITMSMGNLGKISRLVGGTTGSVMTFGSLSSDSTSAPGQLPVKALKQIIQLLNEPL
154	AMQ96184.1	plsX	phosphate acyltransferase	0.079	35744	6.15	Cytoplasmic	333	MKIAVDAMGGDHAPQAIVEGVALAQQDFPEVEFLLYGKEAEIKKYLTNEKNITIIHTDEKINSDDEPVKAIRRKKTASMVLAAQAVKNGEADAVFSAGNTGALLAAGLFIVGRIKNIERPGLMSTLPVVGKEGAGFDMLDLGANAENKPEHLLQYGILGSFYARKVRGIGRPRVALLNNGTEATKGSEVTKKAYELLQNETSLNFIGNVEARELLNGVADVVVTDGFTGNAVLKSIEGTAMNMMNLLKSAILNEGIKGKMGAMLLKDGLRSLKAEMDYSKHGGAVLFGLKAPVIKTHGATGPDAVRYTIRQIHTMLETDVVGQLVEQFEKSEE
156	AMQ96645.1	glnA	glutamine synthetase	0.0785	50568	5.06	Cytoplasmic	446	MVKKQITGEEIKRIIEEENVRFLRLMFTDILGTIKNVEVPVSQIDKVLENKMMFDGSSIEGFVRIEESDMYLYPDLSTWMIFPWESAHGKVARLICDIYNPDGTPFAGDPRGNLKRALKDMRDLGFTSFNLGPEPEFFLFKLDEDGGITTTLNDKGGYFDFAPTDLGENCRRDIVLELESLGFEVEASHHEVAPGQHEIDFKYADVVDACDNIQTFKLVVKTIARKHGLHATFMPKPLFGINGSGMHCNMSLFNDEGNVFYDKDGELELSETAYHFLGGLLKHARAYTAVCNPTVNSYKRLVPGYEAPVYVAWSGRNRSPLVRVPESRGLSTRLELRSVDPSANPYLAMAVLLQAGLDGIRNQITPPAAVDRNIYVMDEEEREAAHIQDLPSTIHNAIK…
157	AMQ96990.1	codY	transcriptional repressor CodY	0.0763	29067	5.13	Cytoplasmic	263	MTDLLTKTRKINTLLQQKNTFDMQADLPYDKMAVTLGGILDSNTYIIGSDGVLLGYNERHDVNNERIKTMFVEKQFPESYTDTVAQLMKTEANIPITSDITAFPVESREKYPFGLTTVVPIFGAGERLGTIILSRMEQSFADDDLVLAEYGATVVGMQILYQKSRSIEADVRSATAVQMAINTLSYSELKAVQAIFEALDGDEGRLTASNIADSIGITRSVIVNALRKLESAGIIESRSLGMKGTYLKVLNSRFKDELAKHSY
159	AMQ97872.1	clpP	ATP-dependent Clp protease proteolytic subunit	0.0757	21664	4.79	Cytoplasmic	197	MNLIPTVIEQSSRGERAYDIYSRLLKDRIIMLSGQVTDDLANSIIAQLLFLDAQDSEKDIYLYINSPGGSVTAGMAIYDTMNFVKADVQTIVMGMAASMGSFLLTAGTKGKRFALPNAEIMIHQPLGGAQGQATEIEIAARHILQTRERLNKILAERTGQPLEVIEKDTDRDNYMTAEQAKAYGLIDEVMENSSSLN
160	AMQ97492.1	res	DNA invertase Pin	0.0751	21734	9.85	Cytoplasmic	190	MTKYGYARVSTASQSTKEQIQQLLENGVEKKNIFSEKFTGTKRDRPKFNQLLAGLKPGDEIVVTKLDRFARNTREALEIIEPLLDDNVTIKVLNLGTIENTSMGRMVTRTLLSVAEMERDMIVERTQEGKMFARKNNPNFREGRPKATITPKKRHAYELLTSGKSYKEVEAITGFSRSTLFRIKKKIEES
161	AMQ96848.1	accA	acetyl-CoA carboxylase carboxyl transferase subunit alpha	0.0751	29287	5.7	Cytoplasmic	261	MDKTAHDVVQLARAKERWTSLDFFEEIFDSFEECHGDRLFADDEAIVGGIARLDGKPVTVIGIQKGRDLQENIRRNFGSPHPEGYRKALRLMKQAEKFNRPVITLINTAGAYCGVGAEERGEGEAIARNLLEMSDLKVPIIAIIIGEGGSGGALALGLADEVWMLEETIYAVLSPEGFASILWKDGSRAAEAAELMKITAPELRELGIVDRVIPETFNGEQLPRYKVAHIMKKALIERLTELVRLDQHKLLEKRYKRFRQY
164	AMQ96865.1	yidA	haloacid dehalogenase	0.0729	30012	5.57	Cytoplasmic	269	MNKKLIAIDLDGTTLNQDSMITSKTKETLKKAINAGHHVSIATGRPFRMSHQFYQQLELTTPMVNFNGALVHIPNQHWDGERETLINREIAFEILSQKKQLNLDFIAAENRDTFFIDSFDFFDEKIFASSRPGEKNLLSPKNLTTNPTSLLVRTDKRFAGAVSAELTRQFGSYVDVRTWGGPTAILEIVSKGIQKAKGVQEIANYLSIDQKDVIAFGDEHNDLELLDYAGWGVAMANGTDQLKGIANDVTPLSNQEDGLAVYLEKLLKL
165	AMQ97464.1	asnB	asparagine synthetase B	0.0724	72882	5.39	Cytoplasmic	631	MCGIVGFVNDKDNKKTIINTMMDRIVHRGPNSSGEYIDKHVALGFRRLSIIDLEGGTQPIYNEDRTKIIIFNGEIYNYQPLREELIAAGHVFQTHADTEVLLHGYEEWGTELLQKIRGMFAFAIWDNEKNELFGARDHFGIKPYYYAEMNGTFMFGSEIKSFLPHPDFNKELNKEALKPYMTFQYSPLNGETFFKDVYRLPEGHYYTYKDGKIDIQQYWDADFETKETHSRQEWIEKIDETVQASIEAHTVSDVEVGSFLSSGVDSSYVTSVLKPDHSFSIGFDDKTYNEAIEARKLTELLDLDNTAAVIDGDMSFKAFPLIQYHLDEPDSNPSCVPLYFLANLASQSVRVVQSGEGADELFAGYQTYGFHTNSKFIRVIAQGLKKLPKGTRYNLGRKI…
167	AMQ98020.1	murE	UDP-N-acetylmuramyl peptide synthase	0.0707	50231	5.86	Cytoplasmic	450	MGIRSHFAIAVGKTSQWALKTFFKGGSSLPGKLALKVDPHILDSLAKDYQVVVVTGTNGKTLTTALTVNILRQQFDEVLTNPTGANMVQGIVSTFLQAKPKKGQKKFAVLEIDEASLSKVTEYMKPELFLFTNIFRDQMDRYGEIYTTYKMIVDGAAKSPNATIISNGDSPIFNSIETVNPRKYYGFDHEEDREQMAHYNTDGVLCPNCHHILHYKMITYANLGKYYCPNCDFKRPELDYRLTDMVRMDNVSADFVIDGHEYGIEVGGMYNVYNALAATAVAEYFNVDPDKIKQGLGYDEKVFGRQEVININGKKCTLVLVKNPVGINQVIDMIGLAPYPFSLVALLNANYADGIDVSWIWDGNFENFADMDIPAVISGGDRHTDMTLRLKVAGIPENK…
168	AMQ97805.1	ntpE	ATPase V	0.0707	22794	4.66	Cytoplasmic	194	MNAIEKIISQMNEAAEQERAALEQEERMKIDQNFEQKRTQIETEHQKQKEKQIELLEKKYRQLRNRQQVEVRQENLNAKQEFLRRLFADAIAEMENWDESEQIQFIKNSLYSLPLTGKVTFIAGEKSAAYLSQTLLDEWNNELPFMMVLSDETVADQAGFLINDQGVQYNFLFSSLVQDIQGTMSFEIANQLFE
169	AMQ96517.1	AS238_06165	hypothetical protein AX771_02420	0.0702	10999	10.37	Cytoplasmic	94	MAKGPLITRSELRKRQQAQASESLKKQRKAETAYQQEEKKIASFYRKESKKNKPITKTRISEREKTTKWNSFLMKSLIIVILMLCVVFLAIAFI
170	AMQ96276.1	tgt	tRNA-guanine(34) transglycosylase	0.0691	43275	6.39	Cytoplasmic	381	MTQPAIRYRLIKKEKHTGARLGELITPHGTFPTPMFMPVGTLATVKTMSPEELKEMGAGVILSNTYHLWLRPGEDLVEEAGGLHKFMNWDQPILTDSGGFQVFSLSDMRNIEEEGVHFKNHLNGSRMFLSPEKAINIQNKLGSDIMMSFDECPPFDESYDYVKKSVERTSRWAERGLKAHANPDRQGLFGIIQGAGFEDLRRQSAKDLVGMDFPGYSIGGLSVGEPKSEMNRVLEFTTPLIPENKPRYLMGVGAADSLIDGVIRGVDMFDCVLPTRIARNGTCMTSQGRLVVKNAKYAHDFRPIDEKCDCYTCKNYTRAYIRHLIKCDETFGIRLTSYHNLYFLLNLMKQVRQAIMDDNLLEFREAFFEEYGFNKENAKSF
172	AMQ96162.1	rpsN	30S ribosomal protein S14	0.0691	7159	10.47	Cytoplasmic	61	MAKKSMIAKNKRPAKFSTQAYTRCERCGRPHSVYRKFHLCRICFRELAYKGQIPGVKKASW
173	AMQ96398.1	ybjQ	hypothetical protein AX771_01715	0.0685	11201	5.11	Cytoplasmic	106	MITTTTNSVEGKAVVAYKGIVFGEVITGIHAFKDLEAGLRNIFGGRSKSYENELMGAREEALAEMAERAKALGADAIIGVKMDYEVLGSDNGMLMVTCSGTAVSTR
175	AMQ98822.1	vanH	alpha-keto acid dehydrogenase (plasmid)	0.0674	35772	6.16	Cytoplasmic	322	MNNIGITVYGCEQDEADAFHALSPRFGVMATIINANVSESNAKSAPFNQCISVGHKSEISASILLALKRAGVKYISTRSIGCNHIDTTAAKRMGITVDNVAYSPDSVADYTMMLILMAVRNVKSIVRSVEKHDFRLDSDRGKVLSDMTVGVVGTGQIGKAVIERLRGFGCKVLAYSRSRSIEVNYVPFDELLQNSDIVTLHVPLNTDTHYIISHEQIQRMKQGAFLINTGRGPLVDTYELVKALENGKLGGAALDVLEGEEEFFYSDCTQKPIDNQFLLKLQRMPNVIITPHTAYYTEQALRDTVEKTIKNCLDFERRQEHE
177	AMQ96297.1	infC	translation initiation factor IF-3	0.0663	19594	9.96	Cytoplasmic	174	MTIAKDMMVNDGIRARELRLIGSDGEQLGVKTKAEALNIAEQANLDLVLVAPGAKPPVARIMDYGKYRFEQQKKDREARKKQKVINVKEVRLSPTIDLNDFNTKLRNARKFLEKGDKVKASIRFKGRAITHKEIGQKVLNRLAEETADIATVEQKAKMDGRSMFLTLAPKNDSK
178	AMQ96157.1	rpmC	50S ribosomal protein L29	0.0663	7339	9.77	Cytoplasmic	62	MKVKEIRELTTAEMLDQEKQLKEELFNLRFQLATGQLENTARIKEVRKSIARIKTVLREQAK
179	AMQ97551.1	AS238_14580	SAM-dependent methyltransferase	0.0652	44867	5.99	Cytoplasmic	392	MKVKVKKRASNRLKKGYPLIQKEDLAHPQKETTQWVELVDSQNQFIAKGYLGKQNKGIGWVLSQQNIPFDQSFFEEFFVKSKEKRTFFFSDDSTTAFRIFNGEGDGIGGLIVDYYAGYAVFSWYNETLYAHRELLIQAFREIYPEIIGGYEKIRFESVNLPESQFIYGKEAPEPLIVKENGVKFAVYLNEGLMTGIFLDQKEVRGSLAEGFASGKTVLNMFSYTGAFSVAAAMGGAIETTSVDLAKRSLKKTQEQFEVNGLDVDQQKIIVMDVFEYFKYAKRKQFLYDMIVLDPPSFARNKKKVFRVAKDYGELVKDSLDILAEDGILIASTNAANVSIEQFQTMIEEEFHAKNVSFEQLALYRLPKDFQTTDTFLEGNYLKVFVYQIKNNH
183	AMQ96332.1	truA	tRNA pseudouridine synthase A	0.0646	28391	6.41	Cytoplasmic	246	MRNIKLTIEYDGKRYSGWQRLGDDDKTIQGKIEKVLHQMTNEEIEIIGSGRTDAGTHARGQVANFKTNTEIGLAEMIDFMNRYLPRDIVIKRIEEMPERFHSRYNAVGKKYSYYVWNNVIPSAFERNHSFYFPQELDMDKLNAACEKLVGTHDFIGFSALKKSKKSTVRTIDELSIERKGEMLHFTFVGDGFLYKMVRIIMGTLLEIGTGAMPIETIDEIFESKVRQHAGETVPAQGLFLDEVYYR
184	AMQ97750.1	secA	preprotein translocase subunit SecA	0.0646	95832	5.39	Cytoplasmic	844	MANLIRSLIENDKKELKRLDSIAKKVEAYADQMAALTDEQLQAKTAEFKGRYQKGETLDQLLPEAFAVVREAAKRVLGLYPYHVQLMGGIVLHDGNIPEMRTGEGKTLTATMPVYLNALTGEGVHVVTVNEYLATRDSTEMGELYNFLGLTVGLNINSKSSDEKREAYNCDITYSTNNELGFDYLRDNMVVYRHQMVQRPLNYAIVDEVDSILIDEARTPLIISGQAEKSTALYTRADNFVKRLKEEEDYKIDVQSKTISLTEAGIEKAEETFGLDNLYDIENTALTHHLDQALRANYIMLLDIDYVVQDGKVLIVDQFTGRIMDGRRYSDGLHQAIEAKEGVEIEDETKTMATITFQNYFRMYKKLAGMTGTAKTEEEEFREIYNIQVYQIPTNRPVI…
186	AMQ97121.1	fabG	short-chain dehydrogenase	0.0635	28828	6.77	Cytoplasmic	262	MNLEDKVVLVTGSSGGLGAQICYEAAKQGAIVISCARRMAFVEGVRDECRRLSGKEAYAFKVDVSNPESVDELYEKVMEEVGRVDILVNNAGFGIFEDFLTFDLGKAYDMFEVNILGMMVLTQKFAIDMAERRQGHIINIASMAGKMATAKSTVYSATKFAVLGFSNALRLELKPLGVAVTTVNPGPIETNFFDKADPSGSYLEKVGQIVLEPAKLAKMIVRNMRHPKREINQPFILEVASKFYTLFPTIGDYLASGIFNKK
188	AMQ96599.1	AS238_13005	ABC transporter ATP-binding protein	0.0635	32930	5.21	Cytoplasmic	301	MKSLSVQELSKNFGHKQALSDVSFSLSPGKIVGLVGPNGAGKTTIMKAILGLIHYSDGTICIGENEISPSSHKGLEQVGALIEYPGIYPFLTGYDHLKLFSETNDVSAIDTIVNQLKMEKYIHKKAKSYSLGMKQKLGIALALLNHPSIVILDEPMNGLDPQATRDVRKIITDLATQGTSFLISSHLLSELEKMVDELILINQGKIIKQCTMAELNQTAQDFIVISTTNDLAARTILTEAGYTLEDPDKIKLLKENEELLGTVIQLLSAQNIHVTDVQHLTNDLESSLLEILDSVKGEEEK
191	AMQ97966.1	iadA	beta-aspartyl-peptidase	0.0613	42603	4.85	Cytoplasmic	394	MKIIRQIEVFAPDYLGKMDVLIAGGKILAVEEQLEGGYEGVEVEELSGEGKVLTPGFIDCHFHILGGGGEGGYQNRTPEVTLSQLTTAGVTTVVGCLGTDGEGRDMTALISKAKGLEAEGISTYVYEGSYRLPVKTVTDSIIKDFLTIDKIIGIGEIAVSDHRSSQPSFEEFARAVADARVGGMLSGKAGIINVHLGGGKRKLELLTRIVEETEIPITQFLPTHANRTPELFEACVAFAKRGGTIDFTASEDPDFWEKTDGEVRFSKALKRLIEEDVSLDNFTMTSDGQGSLPYFDENNHFLGLGVGSAKALLVGIKEAVQKESIPLEIALRAITSNPARILKLDKKGKIEIGADADLCILDKETLDIDTVIAKGEIMVQEKEVKVWGTFEKSF
194	AMQ96844.1	fabF	beta-ketoacyl-[acyl-carrier-protein] synthase II	0.0597	43386	5.18	Cytoplasmic	411	MNRVVITGYGVTSPIGNDADSFLNSLKEGTNGIAPITKFDASETGITLAGEVKDFPYDKYFIKKDSKRMDMFSIYGIYAALEAMEMSGLDKEKMNQDRFGVIIGSGIGGLPTIENQVIRLHEKGAKRVSPMFVPMAIANMAAGNIALRVGAKGICTAIVTACASGTNSIGEAFRNIKHGYSDVILAGGTEATICEMGIAGFAALTALSESTDPNRGSIPFDENRNGFVMGEGAGVLVLESLEHAQARGAKIYGEIVGYGANCDAYHMTAPTPDGSGASKAMKLAMEEAGVQPEQVGYINAHGTSTPANDQAEAKAIQIALGENFRDTYVSSTKSMTGHLLGAAGGIEALATLLALEHQFIPPTINVEKQDPEIDLTVVKNESKPASFTYAMSNSLGFGG…
195	AMQ98302.1	purR	transcriptional regulator	0.0591	30285	5.83	Cytoplasmic	272	MKVRRSERLVDMTQYLLNHPHELISLTSFAERYESAKSSISEDLGIIKKTFKERGYGTLETIPGAAGGVLFIPEISYEEAKKYIESLAERLSEQDRLLPGGYVYLSDLLGEPELLRQVGRIIASKYLGEKIDAVMTVATKGVPIAQAVSYYLNAPFVIVRRDSKITEGSTVSVNYVSGSSERIEKMELSKRSLKRGSRVLVVDDFMKGGGTVNGMKSLIEEFESELVGITVFAESKFNGHRAIDDYTSLLYVKDVDTQTKNITVVPGNYFSE
198	AMQ96532.1	ada	cysteine methyltransferase	0.058	17234	8.71	Cytoplasmic	154	MKIHTPIGFLWLDADESGLTAVSFQPISESESANQRILTRTQEQFEEYFAGKRKEFDVPLSIKRGTPFQQNVWKALSTIPYGEIRTYKEVAVAVDSPKAVRAIGQANRTNPLPIVIPCHRVIGQNGKLTGYMGNAIDGVEIKRQLLLLEGYLQN
199	AMQ96699.1	argR	ArgR family transcriptional regulator	0.058	17154	9	Cytoplasmic	149	MRKKDRHRLITRLLSEQDIRKQEEFVEILKSKGISVTQATISRDIKELKLIKVPASDGGYRYSIPAETNEDVNTKLEKLLKDAFVAVDQMEKFVILKTLPGNASAAANLIDKRYKKELFSIINDDDNVLMITRTEDQAVLLKKDFLHYL
200	AMQ98483.1	AWT83_15000	ammonia monooxygenase	0.058	30812	9.3	Cytoplasmic	267	MLLSLYDKEKPEYLKEALTSIFEQTVMPKEIVLVYDGPINEKLQVVVTYFQQKDPHLFTVVKLEKNQGLGIALAIGLEHTKNRLVARMDTDDIMEPQRLEKQLEIFQKDPEIAIVGSNIEEFTGTLSNVIGKRIVPEYNNAIRVFSKRRNPFNHMTVMFDKKAILEVGNYQPLSGFEDYYLWARLLKAGYKGYNIQETLVYARTGKDMYARRGGMKYLGSGLMGRYRIWKDGLGSVKDFIIVSCGHIFISLLPNQLRGKFYQTQLRK
203	AMQ98342.1	ywnA	hypothetical protein AX771_13440	0.0569	17374	6.75	Cytoplasmic	155	MKYSLQFSDAIHVLAYIEMFQDTRSLSSEMIASSIETNAANVRKIMSQLKKSGLIFTKTGKPQPSLAKSPDQISLLDVYRSIEGNTQLIQVDPKTNPNCVVGANIQEALEESYARLQKKAEEEMAKITLDSLIHKIAVLEKEKRPENTGLVERFL
207	AMQ96821.1	lytR	LytR family transcriptional regulator	0.0553	45793	4.56	Cytoplasmic	408	MKRWQKVLLTLLGVFVLLIAGLSAYGIRFMGEASQTVNKISKNSNRISSKRSERVSIDDKEPFSVLLLGLDTGGLGRTEQGRSDTMMVVTVNPKQKKSTIISLDRDIYTNIVGYGTVDKLNHAYAFGGVEMAMDSIEQLLDIPIDHYVTINLDGMEDLINAVGGIKVNNKIDFTLDGVHVPVGEQTLNGEKGLAYSRMRHEDPEGDIGRQRRQREVVTKIVNKVLSLDGVSNYRKILKAVENNVTTDLDWDDMLDVATNYTPAFETIKQDQLQGEGQMINDIYYQILGKNDLLSIQNELKKQLNIKTSDTLPNLKNENASMMFFDDSEDGDSTNGDGSNSEGYTDYSSYSENTYDQYQDPNTYYQQTEDTSQYYTPSQDTQSYDPYAGQEQNGYGYDQN…
208	AMQ98436.1	clpC	ATP-dependent Clp protease ATP-binding subunit ClpC	0.0553	92703	6.31	Cytoplasmic	830	MEELFTERAQAVLEIAQEEAKRLKHQSVSSEHVLLALVVEQNGIAGKVLREMDLNETEIYEEIEHLIGYGGIRSYPKGVFLPYSPRMKQVFALASSEVKKTGSQKVGTEHILMSLLKDESIMATRIMINLGISLSKARQVLKQKMGLAGDSAGKGMNRRRNVNVQDKRQTPQGTPTLDSLARDLTKLAKENKLDPVVGRSREVKRLIQILSRRTKNNPVLVGEPGVGKTAIAEGLAQKIILGEVPEDMQEKRLMMLDMGSLVAGTKYRGEFEDRMKKVIDEIYNDGQVILFIDELHTLIGAGGAEGAIDASNILKPALARGELQTIGATTLDEYQKYIEKDSALERRFARIQVDEPTPEEAEVILQGLRTRYEEHHGVEITDEAVRAAVNLSVRYITSR…
210	AMQ98444.1	soj	sporulation initiation inhibitor Soj	0.053	28045	4.99	Cytoplasmic	255	MAQIISVANQKGGVGKTTTTVNLGACLASLGKKVLLVDMDAQGNATSGVGIRKPDVTRDIYDVLVNELPIDEATLITEHENLSIVPATLQLAGAEIELTSMMARESRLKGSLAEVSSQYDYILIDCPPSLGHLTINSFTASDSILIPVQCEYYALEGLSQLLNTVRLVQKHFNPELEIEGVLLTMYDARTNLGNEVVEEVRKYFREKVYETIIPRNIRLSEAPSHGKPIIDYDPRSRGAEVYQALAKEVVSREEK
217	AMQ96247.1	udk	uridine kinase	0.0508	24111	5.36	Cytoplasmic	209	MTKSKPIIIGVTGGSGSGKTSVSRAIFNNFPDHSIMMLEQDSYYKDQSHLSFEERLNTNYDHPFAFDNDLLIQHVGDLLNYKAIEKPVYDYVAHTRSQATIIQEPKEVIILEGILILEDERLRDLMDIKVYVDTDDDIRIIRRIKRDMEERGRTLDSVIEQYLTVVKPMYHQFIEPTKRYADIIVPEGGENHVAIDLITTKVASFLNHK
218	AMQ98801.1	AWT83_17015	chromosome partitioning protein ParA (plasmid)	0.0508	29015	4.92	Cytoplasmic	262	MARILSVANQKGGVSKTTTSVNLAACLKFVYGKNVLLVDIDPQGNATDNVGFDIDGTNQPTIYEVLKGEADITDAILDYKGIDVLPADIALSSAEREFTQVGSEHRLKRVLQPIKDNYDYIIIDCPPSLGMLTVNAFTVSDEIIIPVEAAYFSLKGLIKLSETIETVKEYTNDKLEVRGVLFTKYNKRYNISKEMTSAATEISRVIGAKIFKTYIRRTITVDEAQAAGSDLINFNKPSTAEDDYKAFTEEYLKEVGDFDGRR
220	AMQ98419.1	rpoC	DNA-directed RNA polymerase subunit beta~	0.0492	136798	6.54	Cytoplasmic	1217	MIDVNKFESMQIGLASPEKIRSWSYGEVKKPETINYRTLKPEREGLFCERIFGPTKDWECACGKYKRIRYKGIVCDRCGVEVTRSKVRRERMGHIELAAPVSHIWYFKGIPSRMGLVLDMSPRALEEIIYFASYVVIEPGNTNLEKKQLLTEREYREKREQYGQEFQAAMGAEAIKQLLDNVDLDAEAAELKEELKSAQGQKRTRAIRRLDILEAFRASGNQPSWMVMDVIPVIPPDLRPMVQLEGGRFATSDLNDLYRRVINRNNRLKRLLDLNAPGIIVQNEKRMLQEAVDALIDNGRRGRPVTGPGNRPLKSLSHMLKGKQGRFRQNLLGKRVDYSGRSVIVVGPFLKMYQCGLPKEMAIELFKPFVMRELVQRELASNIKNAKRKIERQEDEVWD…
223	AMQ97819.1	lolD	hemin ABC transporter ATP-binding protein	0.0486	24916	5.82	Cytoplasmic	222	MKAIEFKEVEKSFQDGDQVVKALKETTMSIDKGEFVAIIGPSGSGKSTFLTLAGGLQTPSSGSVFINDQEFSNQKESERVKLRFKEIGFILQASNLVPFLTVKKQLLLVDKIKHEHRQKEAKELFEQLGVDKLINKYPEELSGGERQRVAIARALYNDPSIILADEPTASLDSEKAREVVDILAKESKDKNKATIMVTHDTRLIDKCDRIFMMEDGVLKEKE
224	AMQ96584.1	AS238_10190	haloacid dehalogenase	0.0481	25043	5.69	Cytoplasmic	223	MKGAIFDLDGLLVDTEKTYRDGWLWGFQQFDIHIPKEIVDAWGGKNWKQSFDILVKAAGSPEKVQEVRAKREEYFYQQLTSGAIHLKPYAKEILADLKERHMKLGIATTTVTKRATDILDHFKLADYLDTFTFGDEVSENKPSPIPYLTALERTGLEASSAFAVEDSLVGATAASRAGLGVVLIPDSSFVRNYTVEEKEKLKLLAEGKDLRTVIEMLNKKTEK
225	AMQ96849.1	yqeG	HAD family hydrolase	0.0481	19830	9.33	Cytoplasmic	175	MFSNYKPTWMVEAIYQITPAQLKNLGIKAVLTDLDNTLIAWNNPDGTEELLTWILEMKNAGIPVVVVSNNNSKRVARAIEKFDLLYVARAMKPLARGINIAKKQLDLADDEIVMVGDQIMTDIRGANRAGIRSILVKPIIATDSWKTQFNRFWEKRIMAYLLAKHPDMGWRGGIE
226	AMQ98491.1	AS238_15270	aminotransferase	0.0481	45764	5.19	Cytoplasmic	405	MREFEKSNKLEGVSYDVRGPVLEEAERMQEEGISILKLNTGNPAPFGFEAPNEVIRDLIMNARDSEGYSDSKGIFSARKAIEQYCQLKHFPNVTINDIYTGNGVSELITMCMQGLLDNGDEVLVPMPDYPLWTASIALAGGTPVHYICDEEAEWYPDIDDIKSKITSRTKAIVIINPNNPTGALYPKELLEEIVEVARQNNLIIYSDEIYDRLVMDGLEHIPIATLAPDLFVVTLNGLSKSHRVAGFRVGWMVLSGDKSHVKGYIEGLNMLSSMRLCSNVLSQQIIQTALGGYQSVDELLLPGGRIYEQREYIYNAINDIPGLSAVKPKAAFYIFPKIDTKRFNILDDEKFVLDFLHEHHILLVHGGGFNWNQPDHFRIVYLPKMDDLKQTAKKMREFL…
228	AMQ98577.1	HMPREF1359_00847	ATP-dependent Clp protease ATP-binding subunit (plasmid)	0.0475	77792	5.15	Cytoplasmic	704	MANFYGNDPFFNNDMDDVFNQLFRRMDNQNSGRARYLVNGQSLTPDEFAQYRATGKLPQNNKTIEVSKDGKQAVKKGGILEKLGTNLTEQARDGLLDPVIGREKEIQETAEILSRRTKNNAILVGDAGVGKTAVVEGLAQAIVAGKVPETIQDKEIYSIDLSSLEAGTQYRGSFEENIKQLVEEVKAAGNIILFFDEIHQILGTGATGGEDGGKGLADIIKPALSRGELSVIGATTQDEYRNTILKNAALARRFNDVVINEPTAADTLRILQGVKELYEKHHHVVLPDDVLKAAVDYSIQYIPQRTLPDKAIDLIDMTAAHLAAKNSQTDVETLDQRLKKLEAAKEAAIKAEDFTKAADIKKSIEETKQKIKETDQKEKITVTIDDVAQSVERLTGIPV…
229	AMQ97982.1	msmK	sugar ABC transporter ATP-binding protein	0.047	41154	6.23	Cytoplasmic	369	MVEMALKNVYKKYDNAENYSVTDFNLSIKDREFIVFVGPSGCGKSTTLRMIAGLEDISEGELNIGGKVMNDVAPKDRDIAMVFQNYALYPHMTVFDNMAFGLKLRKYDKADIKKRVDNAAEILGLTEYLKRKPAALSGGQRQRVALGRAIVRDAKVFLMDEPLSNLDAKLRVAMRAEIAKLHQRLETTTIYVTHDQTEAMTMADRIVIMKDGFIQQIGTPKEVYDTPVNMFVAGFIGSPAMNFFNVTLKNGVITDGHGLKLRIPEGKNKVLVEKGYEGKEVIFGIRPEDIHSEQVALEASPEAVVKSEVVVSELLGAETMLYTKTGSTEFISKVDARDFHKPGEIVDLAFNISKGHFFDKETEQVIKLP
232	AMQ96427.1	macB	sulfate ABC transporter ATP-binding protein	0.0459	85416	5.4	Cytoplasmic	778	MLQLKDIKKYYKVGETTTKALDGVSVAFRQKEFVAILGPSGSGKTTMLNVIGGLDNYDSGDMVINGKSTKDFKDSDWDAYRNNSIGFIFQSYNLIGHLGIIENVELGMTLSGVSKDEKRKRAEDALHRVGLTNHMHKKPNQLSGGQMQRVAIARALANDPDILLCDEPTGALDTETSIQIMELIQELSKEKLVIMVTHNPELAHQYADRIIEFSDGKILTDSHPHIERPKDDQFNLRRTKMSFWTALKLSFNNIRTKKGRTFLTSFASSIGIIGIAIVLSLSSGFQKQIDNTQAETMAKFPITISKVTTNQTRDDAGLGASKADYPDSKTITAKVSEEDKAQHTNKIDQTYVDYVTDIDPNLSNNIGFTRTTGINLLRDVNGKVQPVSFSNQNPDTESL…
235	AMQ97768.1	atpH	ATP synthase F0F1 subunit delta	0.0453	20804	5.19	Cytoplasmic	180	MKLDKYTVGRRYGKALFELAIDSNKAEEIYQDLVSLRQIYEQVPGLGNMLSDVRLEPHEKREIMDKLVSGYDGIVKNFLEVVYAYNRMDDLLFMIEEYERRYDEHQGLLLGSVTTAVPLSDEQRIQLEKNVAKTMNYQSVELKQIVDSSIIGGAIVEANHRVIDGSIRTQLENMRNQLNR
236	AMQ98021.1	cobQ	adenosylcobyric acid synthase	0.0453	26148	4.91	Cytoplasmic	232	MANYELNIAHLYGNLMNTYGDNGNLLMLKYIAEKMGVSCHTEIVSIHEPFDADKYDLVFFGGGQDFEQLIISKDIQKKKDSLINYIENDGVMLAICGGYQLLGHYYMGANGEKIQGISALDHYTLSQENNRFIGDIVIHNEEFNETYYGFENHNGRTFLGEGERPLGKVVQGQGNNGEDQSEGVIYRNVFGSYFHGPILARNENLAARLIRLALEQRYGKELDLPYLEGQTA
237	AMQ98313.1	AS238_02895	transcriptional regulator	0.0448	31908	4.82	Cytoplasmic	294	MAFETIGEKLRQARLNKKISLDELQQITKIQKRYLEAIDNDDFDQLPGKFYVRAFIRQYAEAVGEDGDHLVDVFDGKSKLTGSVPERPQPETVSTSRKAMHQEESHPSRFWTSLPVILLGLVALAIVVVVGYMTWQDRQADPIIGDTASSLKVEGSVEESSSSEQSTQTKESSTVESTTKSSEEKKMAIATGEDSGSAIAVNITDATKPVTLEFTAVNRVWLGVLVDNAYVYQGTLAANETQSTVLPETATNATITIGAASNATIKANGESVPVNPGENNQSPKNVNLTLQYAE
239	AMQ97729.1	HMPREF1359_00280	general stress protein	0.0448	21116	4.68	Cytoplasmic	200	MAKKGGFLLGAVVGGTAAAIAALLLAPKSGKELRDELAAQADDLMDMASDYTDMAKEKSTELTGIAKEKAQDLSQQAGDLAGSVKQKVSESADEAGSESDDILLNLKEQSADLSNRFKKTAEDMKKPADELGSIAKDTSEDIMIDVKDAAGKAGHTVNEGMSEAKPVADDTKEMMKMAKEDAKEAKKEIKDTMTDSSTNH
240	AMQ97850.1	A5810_002276	hypothetical protein AX771_10345	0.0431	10272	5.64	Cytoplasmic	88	MGFTDETVRFGFDDSRKKEVSETLAIVYRALEEKGYNPINQIVGYLLSGDPAYIPRYRDARNLIRRHERDEIMEVIVKDYLSNHGVNL
243	AMQ97664.1	asnS	asparagine--tRNA ligase	0.0431	49722	5.27	Cytoplasmic	432	MEQIQIIDSKNHVGETVTIGAWVANKRSSGKIAFLQLRDGTAFFQGVVVKSEVSEEVFQTAKNLHQETSVLVTGEIREDSRSKFGYEIGITNVEVVSESHDYPITPKEHGTDFLMDHRHLWLRSSRQHAIMQIRNEIIRATYEFFNQHHFVKIDPPILTGSAPEGTTDLFETNYFDQKAYLSQSGQLYMEAAAMAFGKVFSFGPTFRAEKSKTRRHLIEFWMIEPEMAFTHQEESLEVQEQYVAFLVQNVLDHCEYALDVLGRDKEVLKTYTKLPFPRITYDDAIELLKKNGFDDIEWGEDFGSPHETFIANSFEQPVFILNYPKAIKPFYMKPHPTREDVVICADMIAPEGYGEIIGGSERATDYDFLLEQIRNHGLDEKEYSWYLDLRKYGSVPHSG…
245	AMQ98208.1	ecsA	multidrug ABC transporter ATP-binding protein	0.0425	27511	5.25	Cytoplasmic	245	MSLIIDHVTGGYGHLPVLKDISFDVQPGEIVGLIGLNGAGKSTTIKHIIGLLEASKGTIEINHLSLKKNTEEYRKQIGYIPETPSLYEELTLREHIEVTAMAYDIPMDIAMKRAEKLLETFRLSNRLDWFPANFSKGMKQKVMILCAFLIEPSLYIIDEPFLGLDPLAINALLELMVEMKKEGAGILMSTHILATAEKYCDRFVVLHNGEIRADGSLEMLRKEFQLPDSSLDEIYIALTKEQAHE
248	AMQ96764.1	tsh	phage tail protein	0.042	22138	4.88	Cytoplasmic	202	MAKTKTVVTTFDNVSIKRIAFNFKNAGNAIATNCNGQLDGETEMQTVVKKCGATEVKSKSKPINMTVTITAHVPMEVYRRFNGLKQDGRIKPGIYSYGPDSVGEDFSLAAEIVDDFEENRKLVGMLACTSNTGLTFSIENGADEVAALELETKVMQDEFGKFYHEAIVAELEEDLTDQWMTNLSADVIKKTSVVTTTATQSQ
252	AMQ97321.1	dagK	diacylglycerol kinase	0.0414	34096	5.79	Cytoplasmic	302	MEKLLVFYNKSSGKDEGEKLARWFQDYVKEKQPELYVELAETGPSIDDAELVKKAEAIEADTLVIIGGDGTIHHIVQAFQKTLSQYHVGLLPGGTVNNLARVLEIPLKKEEAADVILEGNVRKIDYGQVNDEVIISTLTIGILADTAVWISQEEKQRYGSWIFIKKFFKLLLKKKKYHLDLETDEEHWKGKSQLLTVTMSNSVGGFTNFDDSATLDDGKFHVTIVPSLDIFRFIFYLPRIMRGKFYTIPGITYFTAKRMKIQAQEKSVGTRTDGDTTDDLPVELSVVSKGLTVYSPKKEEKA
254	AMQ96160.1	rplX	50S ribosomal protein L24	0.0409	10931	9.82	Cytoplasmic	102	MFVKKGDKVKVITGKDKNKEGVVLAAFPKKDKVIVEGVNVVKKHQKPSQAAPQGGIVEMEAPIHVSNVMVVDSTGVAGRVGYKEVDGKKVRVSKKTGEVLDK
255	AMQ98195.1	uspA	universal stress protein UspA	0.0392	17360	4.93	Cytoplasmic	159	MLQQYKKIMVAVDGSDEAELAFKKAVNVAIRNNGELLLAHVIDTRSFQTVSSFDGMLAEQATEMAKQTLADYESNAKKAGLNNVTSVVEYGSPKQIIAREIPEDNQVDLIMLGATGLNAVERLFIGSVSEYVIRNAACDVLVVRTDLENQLPAKDHTKA
257	AMQ98001.1	glnQ	polar amino acid ABC transporter ATP-binding protein	0.0392	23357	5.7	Cytoplasmic	211	MIELKKVNKAFGEKKIIKDLNLIIPDGKTLAIVGPSGGGKTTLLRILAGLESSDSGEFYLDGVPFNPFELKMKEQVVGVVFQDFQLFPHLNIFENITLAPKMVLKQTKEEYTKKAEELAASLGISDLLNIYPYQLSGGQKQRVAIARALAMNPRVLAYDEPTSALDPELRQQVERLILSLKEDGVTQIIVTHDLVFAENVGDQLLKVSPIH
258	AMQ97169.1	pyrE	Orotate phosphoribosyltransferase	0.0392	23151	5.06	Cytoplasmic	209	MNVEQSIAKDLLEIEAVFLNPSNPFTWASGIKSPIYCDNRITMSYPKVRKEIAKGLASKIKEAYPEVQVIAGTATAGIPHAAWVAEILDLPMVYIRSKAKDHGKGNQIEGRIFEGQKMVVIEDLISTGGSVLEAAEAAKREGADILGVAAIFTYELPKGKANFEKAEIPLMTLTNYSVLIEAALEDRYIDEQELTLLKEWKKDPENWQI
259	AMQ98070.1	HMPREF1359_02352	hypothetical protein AX771_11700	0.0392	29539	5.74	Cytoplasmic	260	MLDFQSKPNIFEEMSYEEAVKWLLRQAAIHYDGSDHDAHVLATESNAGFATPETVMQARGRWLRDYKLPQKYPNILDIPPGKYATKAGWGANNPGGIEDDSFVEMMVFADHDLRKLIVAFARYSGEIYIKMTHNSDPVEGYNSLGWRRVYTTSVLFEGELRKGQSVNLPDDTFRYQTLRIHYTDGDGDFIEEIKRQRYARITKANLWNGDAGVTFIEFELTIEARKITMSNGRVLNISSGNVSNPAMSNDVKITKIEGVK
261	AMQ97727.1	ccpA	catabolite control protein A	0.0381	36430	5.47	Cytoplasmic	333	MEKQTITIYDVAREANVSMATVSRVVNGNPNVKPATRKKVLEVIDRLDYRPNAVARGLASKKTTTVGVIIPDVSNMFFASLARGIDDVATMYKYNIILANSDGNDQKEVNVLNNLLAKQVDGVIFMGHHITDEIRGEFSRSKTPVVLAGSIDPDEQVGSVNIDYVSATKDAVNKLAKSGNKKIAFVSGALIDPINGQNRLKGYKEALSENNLPYSEGLIFEAQYNFKDGLSLVDRIHNSGATAVYVSDDELAIGILDGLLDRGVKVPEEFEIITSNNSLLTEVARPRLTSITQPLYDLGAVSMRLLTKMMNKEEVEEKTIILPYGIEEKGSTK
262	AMQ96522.1	prsA	ribose-phosphate pyrophosphokinase	0.0376	36768	5.64	Cytoplasmic	333	MSNKYQDDTLKIFSLNGNRPLAEKIAKVFGTELGKSVVKQFSDGEISINIEESIRGDHVYIVQSTNAPVNDYYMELLIMIDAMKRASAKTINVVLPYYGYARQDRTAKPHEPITAKLIANLIEEAGATRVLTLDLHTVQVQGFFDIPVDNLFTMPLFAHYYRQLGLTGDDIVVVSPKNSGVQRARSLSEYLNSTLAIVDHADDASTEGGYVIGDVQGKTCIMVDDILNTGATLARAANVLKENGAKEVYACASHGLLSDHAKSILDNAPIKDICITDSVFTEENRHPENLTIVTCSELMGEAVKRIHENTPMSPLFRLEEKNSNKQKKEGKKL
263	AMQ96646.1	fba	fructose-bisphosphate aldolase	0.037	30732	4.89	Cytoplasmic	289	MPVVSGAEFLKAARKGGYAVGGFNTNNLEWTQAILEAAEAKQAPVLIQTSMGAAKYMGGYKICKDLITDLVEAMNITVPVAIHLDHGDYEAALECIELGYTSVMFDGSHLPFEENLKLAKDVVEKAHAKGISVECEVGSIGGEEDGIIGNGELADIEECKQMVATGIDYLACGIGNIHGQYPENWKGLAFDHLQAIADAVGPDMPLVLHGGSGIPQDQIEKAISMGISKVNVNTEFQLSFAAATRKYIEAGKDKEGKGFDPRKLLAPGKAAIVEDAKSHIDWFGSANKA
265	AMQ98197.1	ackA	acetate kinase	0.0365	43966	5.15	Cytoplasmic	394	MSKTIAINAGSSSLKWQLYQMPEETVVAKGIVERIGLQDSIFTIKYGDNQKFEQIMDIENHEVAVKMLLDQLIELQILSSYDEITGVGHRVVHGGETYGDSVVIDEKVMDRIAELAEFAPLHNPANLMGIKAFKKILPDILSVAVFDTSFHSTMPKQNYLYSLPVSYYEDFKVRKYGFHGTSHRYVSERAAKLLNKPIEELKIITCHLGNGVSITAVDGGKSMDTSMGFTPLAGVTMGTRSGDIDPAVLPYLMEKLEIDIDEMINVLNKKSGLLGLTGLSSDMRDLEKNYEKEHIRLAYDIFVDRIRKYIGGYVTTMNGVDAIVFTAGIGENDGHVRSEIIKGMSWFGCEIDPALNELRGEEVDISTKESKVRVLVIPTDEELMIARDVERLRG
268	AMQ97765.1	atpD	ATP synthase subunit beta	0.0359	51022	4.66	Cytoplasmic	468	MSSGKIVQVIGPVVDVEFSLDQSLPDINNALVVYKNDENKSKVVLEAALELGDGVIRTIAMESTDGLQRGMEVIDTGKAISVPVGKETLGRVFNVLGDTIDLETPFPEDAERSEIHKKAPAFDELSTSTEILETGIKVIDLLAPYLKGGKVGLFGGAGVGKTVLIQELIHNIAQEHGGISVFTGVGERTREGNDLYYEMKDSGVIEKTAMVFGQMNEPPGARMRVALTGLTIAEYFRDVEGQDVLLFIDNIFRFTQAGSEVSALLGRMPSAVGYQPTLATEMGQLQERITSTKKGSITSIQAIYVPADDYTDPAPATAFAHLDATTNLERKLTEQGIYPAVDPLASSSSALAPEIVGEEHYKVATEVQHVLQRYRELQDIIAILGMDELSDQEKVLVSR…
270	AMQ98490.1	ylqF	ribosome biogenesis GTPase YlqF	0.0348	32507	9.24	Cytoplasmic	286	MTIQWFPGHMAKARREVSEKMKYVDIVFELVDARLPLSSRNPMLDQIIQQKPRLVLLNKADLADPQQTKLWQEYFRKQGHLALAITAQESKGIKGLVPAAKEALKEKRARDAARGIKPRAIRAMVLGIPNVGKSTLMNRLVGKKIAQTGNKPGVTKGQQWLRLGNELELLDTPGILWPKFEDEEIGKKLALTGAIKDQLVHLDDLAIYGLDFFARYYSGRISDRYGLSIEQEEKLAPELLMDITAKRGYKEDYDRGSELVVHDIRQGKLGRYTLDRCEEMEQKSDD
272	AMQ98076.1	HMPREF1359_00599	hypothetical protein AX771_11750	0.0337	12703	6.6	Cytoplasmic	108	MRYDTEVTFVIEKDGYYDPELGEHVEPTLDEKIKLANVTDLGTDRSKVLFGDIKQGAKVIRLLRPYTKEWDYVLIFNKLKSKTEKFEIITERNLRLKNTFIVQEVIAK
274	AMQ98484.1	AWT83_14995	2-C-methyl-D-erythritol 4-phosphate cytidylyltransferase	0.0337	33033	7	Cytoplasmic	284	MKKIQQITLKMSQEIVDFCLKNQLLCYFCGGGAIGTVREQGFIPWDDDLDFFMPREDYEKFYQLWVNSEKSKKYPIQKASKNYNDHNSFTTIRDADTTFIKTYQRDLDIVHGITIDIFPLDVAPVSKFSRKIQKLWALVYALFCSQVVPEKHGGIMATGSKILLSIFRSPRTRYKIWSFAEKQMTKYNNEPTGYVTELCVGPKYMGNVYPAKDFESAVWVPFEDTEMPVPVGYDNYLSQVFGDYMQLPPEKDQVSHHEAVYIDPEHPYTMYKGKYYLTKGAEKK
277	AMQ97462.1	rpmG	50S ribosomal protein L33	0.0332	6006	9.95	Cytoplasmic	49	MRVNITLECTSCKERNYLTSKNKRNNPDRLEKQKYCPRERKVTLHRETK
281	AMQ98403.1	B1P95_02540	manganese ABC transporter ATP-binding protein	0.032	27673	7.68	Cytoplasmic	246	MLEVKKLNVCYNDFLALNEISLKIQEGALTGIIGPNGAGKSTLLKAMLNIIPHQGEVSINNEDINKKLVKIAYVEQKADIDFTFPIKVKECVSMGTYAGMKVFQRIKNAEWQRVSKALEKVDMGKYSNHQIGELSGGQFQRVLLARCLAQNADFIFLDEPFVGIDLVSERIIMDTLKELKHQGKTVLIVHHDLSKVKKYFDNIILLNRNLIAHGSVESVFNEENLKKAYGDTIFIGETNYIESSKN
282	AMQ97783.1	pgk	phosphoglycerate kinase	0.0315	42087	4.91	Cytoplasmic	396	MAKKTVKDIDLKDKKVLVRVDFNVPLKDGVITDGTRIKAALPTINYVLEQGGKAILFSHLGRVKTEEDKEGKSLAPVAKRLGELLGKEVTFVPETRGEQLEEAIRNMNDGDVVVFENTRFEDIDGKKESKNDTELGKYWASLGDVFVNDAFGTAHRAHASNVGIASTGIPTVAGFLMEKEIKFIGEAVEEPKRPMIAILGGAKVSDKIGVIENLIPKADKILIGGGMTYTFYEAKGIKIGNSLVEADKVELAKELIEKAGDKLVLPIDNVCAPEFSNDVETQVIEGDIPDGLMALDIGPASVKLFADTLQGAKTVVWNGPMGVFEMSNFAKGTIGVCEAIANLEGATTIIGGGDSAAAAEQLGFADKFTHISTGGGASLELLEGKELPGLAAINDK
284	AMQ97067.1	AS238_02170	hypothetical protein AX771_05735	0.0315	13595	6.85	Cytoplasmic	112	MQLDNSEFEITKRRGLIVWVYSLKQLKNLKKFGLLHYVSRRMKYVVLYLNEETLEETEERIRKLHFVRNVERSYRPDIEMNFAEKIGNKTVLKDEGFEIEELNTEIRLAEHL
286	AMQ96530.1	AS238_09050	DNA topoisomerase III	0.0315	78840	9.59	Cytoplasmic	690	MKQLILAEKPSVAKDLSKVLGANQKHKNYYEGPKVIVTWALGHLLGLKMPEDLNKEWQSWQMDTLPMIPKKLGIKPLPKTGHQLKAIKQLAQRKDVSEAVIATDAGREGELVARWILEYVHFNKPVKRLWISSQTDKAIKTGFKQLRPAKEYDALYESALARAKADWLVGLNVTRALTVKYADNLSAGRVQTPTLALVRDQEKKIEQFRPQTYFTITLQAGKEQAKMLQKNQFALKTQEEAQKLVQLISTSKGTVTEVQEKLKTESAPLPYDLTEIQREANQRYGYSAKKTLSLVQSLYETHKIVTYPRTDSKYLTNDMKSTMKERLQAVSDFAPEVKQYLKNGAIVQQTKVFQDSKVTDHHALLPTENRARYEKLSNEERKIYQMIVSRFLGLFAQPH…
288	AMQ98564.1	A5836_002689	DeoR family transcriptional regulator (plasmid)	0.0309	28542	5.9	Cytoplasmic	255	MNKKRRLEKILDMLKIDGTITIKEIIDELDISDMTARRDLDALEADGLLTRTHGGAQLLSSKKPLEKTHIEKKSLNTKEKIDIAKKACSLIKDGDTIFIGPGTTLEQLALELKGRKGYKIRVITNSLPVFLILNDSETIDLLLLGGEYREITGAFVGSMASTNLKAIRFAKAFVSANAVTHNSIATYSDKEGVIQQLALNNAVEKFLLVDSTKFDRYDFFNFYNLDQLDTIITDNQISPQHLEEFSQYTTILKAD
290	AMQ97066.1	AS238_02180	hypothetical protein AX771_05725	0.0304	43291	4.7	Cytoplasmic	374	MKRLGLFWLILLLVIVAFYMEPVLFPPKLEVKENSDQQISNQMTTWKYQELKATGFSTYIGKPIDQLEKDFGQAYDRLTSGFGFETRYYENKASHLTFEANIQDSRVTTVKVLQTGPADIAPFYLGMTMQDLTKITTIYTNFTFEYHDTEVGIELMEEDMNYRPLIAFDNDTFAILFFDQTTNGLFSVVYLDKDSLLKLLPYQVFGEGLPHYQADKSADWESINRVKERKSTTLLNMLRREDELPIYNQTLAFQNHSQLLLHDFLTRPEEILSEERMADWQKSLGSAQTTVKFSLTNDELEKLISKQKLENTSGLFIHPAIDATFSFLYWYSDPYNHDRFMDPGTDSVGIAFSKENMLVLLQEENGESSDSSDR
291	AMQ98810.1	B4W81_16615	hypothetical protein AX771_15640 (plasmid)	0.0298	6705	9.67	Cytoplasmic	59	MPIAIGNKRLPVTLDEKRQKELQQLKQKYGKSESRIMCIALDLLIAQEKAGFEVPALKK
293	AMQ96142.1	hin	resolvase	0.0293	22052	6.13	Cytoplasmic	193	MKIIGYARTTINDVDLTTQVDQLSDFGCQEIFHETYEVEQNDSTAVHLESVIADMQQGDALVICQLHRLGKSTRQLTELTQLFKDRGLHLISLDEGIDTREMGKIYFQLMENLANMECALIKERTLVGLDEARKKGKIGGRPKIDAKTIKKIRRLYYEKKETIQFISSKCGVSVGTCYKYINLPEKEIEQLCI
295	AMQ96183.1	dhaK	hypothetical protein AX771_00455	0.0293	60347	4.47	Cytoplasmic	560	MSVTEISASQFQEMVQAGANRLQVNAEYVNSLNVFPVPDGDTGTNMNLSMTSGAKAVVDSTSEKVGELAAMLSKGLLMGARGNSGVILSQLFRGFSKQIPDVVSLNASDLAAAFTHGVETAYKAVMKPVEGTILTVAREAAKAGEKKAKSTDDVVEVMTAVVKGAKRALAKTPDLLPVLKEVGVVDSGGQGLLFVYEGFLSALNGEFQADETYEPSPAEMDDMVNAEHHRSVQGQMATEDIHFGYCTEIMVKIGEGPTVDSTFDYEEFRNYLDGIGDSLLVVNDDEIIKVHVHTENPGEVLNYGQKFGSLVKIKVDNMRLQHETILEHDEEVNEFAKKEIPRIPYGIVAIAAGKGVQELFESLGANYVISGGQTMNPSTEDIVKAIQEVNADKVIVLPN…
299	AMQ96691.1	A5836_000101	hypothetical protein AX771_03460	0.0287	14592	9.66	Cytoplasmic	124	MVQSINTKVDLVIDATSFTGLTDYGQIMIGDNGFEFYHARDRRKYIQIPWEEVDYVLASVMLKGKWIPRYAIQTKKNGTYTFSSKEPKKVLRAIREYVDEDRMVQSLSFFDVVKRGIRSMFKRK
301	AMQ97440.1	arcB	ornithine carbamoyltransferase	0.0282	38358	5	Cytoplasmic	339	MKESVFQGRSLLAEKDFTKEELQYLIDFSEHLKDLKKRGIPHHYLEGKNIALLFEKTSTRTRSAFTTAAIDLGAHPEYLGANDIQLGKKESTEDTAKVLGRMFDGIEFRGFSQKMVEELAEFSGVPVWNGLTDEWHPTQMIADFLTIQENFGTVEGITVAYCGDGRNNMANSLLVTGAILGANMRIVAPKELQPEEEIVKMAEGFAEKSGAQLMITDDVDKGVDGADVLYSDVWVSMGEEDKFEERIKLLKPYQINMEMVEKTHNTDRLIFLHCLPAFHDTNTVYGEQMKERFGITEMEVTDEVFRSKYARQFDQAENRMHSIKAIMAATLGNLFIPRV
302	AMQ97880.1	AWT83_01095	hypothetical protein AX771_10535	0.0282	14885	4.71	Cytoplasmic	132	MDKGNSVTFALENISLNKIHFELTDNFSYGDLEFNIELGYKEDEAEYLEKKLVSLRAHIVGGMEGAPVDILLFSVIRVSTNEQPYKKLVEESMGELAKPILNKASNLISNLYSEVGVMPTVIDLYQLYSQQK
304	AMQ96181.1	rpmB	50S ribosomal protein L28	0.0282	7015	11.48	Cytoplasmic	62	MAKVCYFTGRKTKSGNNRSHAMNSTKRTVKPNLQKVRVMVDGKPKKVWVSTRALKSGKVERV
305	AMQ97430.1	uppS	UDP pyrophosphate synthase	0.0276	31102	5.75	Cytoplasmic	270	MLRFFPQKNKYIQEKSEFQFNTDGPIPQHIAIIMDGNGRWAQNRRLPRVAGHKEGMETVKKVTKKASRLGVKVLTLYAFSTENWKRPKDEVSFLMQLPVDFFDTFVPELIKENVKVHVMGYENVLPEHTQDAVRRAIEQTKNNTGMVLNFALNYGSRAEIVTAVQEIAEEVAKGEIHAEEIDDELIAKHLMTGFLPKELQDPELMIRTSGEERISNFLLWQIAYSELYFTKALWPDFDGAHLEEAIASYQNRDRRFGGVKKTEDEKGDQS
306	AMQ96225.1	dhaS	TetR family transcriptional regulator	0.0276	23049	5.14	Cytoplasmic	192	MSDTTRTKQLIKNVLIDLCQTQSFRKISVQKIANEAKINRQTFYYHFTDKYDLLRWVYCEDALHYLDPQCLSLDNWEEQALKMLKAIAEKKEFYANTVLSDPEILQKEFSQLIQKSFIKIFEQMDEERQLSARDKLFYARFFSYGCSGVLVNWITNEYEETPMEIAMQLFRLAKDTELYSYRLYAKEELEEQ
308	AMQ97213.1	AS238_15655	fatty acid-binding protein DegV	0.0276	31083	5.34	Cytoplasmic	282	MKLAVVTDSSAYLPERIKNHPDLFVIPIPLIMDGKIYNEGIDIEADEYYGLLKNSKDFPTTSQPVVGEVLGLYEELKEKGYDTILSIHLSSGISGFVNTLFAMKDDISGVTVIPYDSKITSMPMGHMVEAALDLNDEGQSLDEILAHIDRIRDNTYAYLIVDDLNNLVRGGRLTNGAALIGSLLKIKPILTFSEGKIVLFEKIRSSKKAFARAEEIIGRRNNEIQPPVKLYVIHANNLEVAIAEKEKLQKKYPNAEIEIGHFGPVIGTHLGEKAIGIAISAQ
309	AMQ96789.1	rmlA	glucose-1-phosphate thymidylyltransferase	0.0271	31891	4.86	Cytoplasmic	288	MKGIILAGGSGTRLYPLTKATSKQLMPIYDKPMIYYPMSTLMLAGIKEILIISTPQDTPRFKELFGNGNDLGLQIEYAVQESPDGLAQAFIIGEEFIGDDSVCLVLGDNIYYGGGLSKMLQRAASKDTGATVFGYHVNDPERFGVVEFDENMQALSIEEKPAQPKSNYAVTGLYFYDNEVISIAKGIKPSERGELEITDVNKAYLDKGKLSVELMGRGFAWLDTGTHESLLEASTFIETIEKRQNLKVACLEEIAYRMGYIDKEQLLALAQPLKKNQYGQYLLNLAAE
310	AMQ96846.1	fabZ	3-hydroxyacyl-[acyl-carrier-protein] dehydratase FabZ	0.0271	15305	6.75	Cytoplasmic	139	MNIQEIKEIIPHRYPMLLIDRVEEMVEGERIVAKKNVTINEPFFQGHFPEEPVMPGVLIVEAMAQAGAVALLSLEQFKGKTAYFGGLDKAKFRKKVTPGDTLYLEVEILKVKASAGIGKGIAKVDGKKVAEAELTFMIG
313	AMQ97433.1	tsf	elongation factor Ts	0.0265	32223	4.94	Cytoplasmic	293	MADVTAKMVKELREMTGVGMMDAKKALVEVEGDMEKAVDLLREKGMAKAAKKNDRIAAEGLASVAVKGNTAAIVEVNSETDFVSKNEMFQDLVKEIAELVAENKPADMEAAMKIKTDKGTIESDLIEATQVIGEKISFRRFEVVEKDDNAAFGGYLHMGGRIAVLTVLDGTTDETVARDVAMHVAAINPRYVNESQIPEAELEHEKTVLTEQALNEGKPANIVEKMVEGRLKKFKAEIALVDQPFVKDPDMTVEKYVASKGATVKTFVRFEVGEGIEKREDNFVEEVMSQVKK
314	AMQ97802.1	ntpA	ATP synthase subunit A	0.0265	65378	4.68	Cytoplasmic	593	MQIGKIIKVSGPLVMAENMSDASIQDMCLVGDLGVIGEIIEMRGDVASIQVYEETSGIGPGEPVRSTGEALSVELGPGIISQMFDGIQRPLDTFMEITQSNFLGRGVQLPALDHEKKWWFEPTVEAGETVSAGDVIGIVEETKVIKHKIMVPNGIKGTIKTIEKGSFTIDETVCVIETENGDKNLTMLQKWPVRRSRPIKEKLNPDAPMITGQRVIDTFFPVTKGGAAAVPGPFGAGKTVVQHQIAKWADVDMVVYVGCGERGNEMTDVLNEFPELIDPNTGESLMERTVLIANTSNMPVAAREASIYTGITIAEYFRDMGYDVAIMADSTSRWAEALREMSGRLEEMPGDEGYPAYLGSRLAEYYERSGRVIALGSEGREGSITAISAVSPSGGDISE…
316	AMQ97970.1	galU	UTP--glucose-1-phosphate uridylyltransferase	0.026	32704	5.2	Cytoplasmic	293	MKVKKAVIPAAGLGTRFLPATKAMAKEMLPIVDKPTIQFIVEEALDSGIEDILIVTGKEKRPIEDHFDANIELENNLREKEKTELLALVEETTQVNLHFIRQSHPRGLGDAVLQAKAFIGNEPFVVMLGDDLMKDDIPLTQQLMMDYEETQASAVAVMRVPENETSKYGIIDPKTDSEKGRCRVKGFVEKPEMGKAPSNLAIIGRYLLTPKIFEILETQEPGAGNEIQLTDALQTLNQTEAVYAREFKGKRYDVGDKLGYMKTNIEYGLQHSEIGTSLSAYIIQLSKKLRTES
318	AMQ97422.1	infB	translation initiation factor IF-2	0.0254	84525	6.4	Cytoplasmic	768	MGNKRIYELAKELKKSSKDVVEKAQQLGIDVKNHMGAITSNDEKKLQQAFKNPSTKQQAAQQASRKPANQQPNDQRKKETTNNQQKNKNNRSYQDRGQGSGQVNQGKKPTTNQNNTGNTSSQNRQGTSQGGNQNRTNNNNKPNNNNRGKFNNNNRNRYNKKGKKGKQQQSTKPAVPPRKFRELPDVLEYTEGMNVADIAKKIHREPAEIIKKLFMLGVMVNQNQALDKDTIELLATDYGMEPQEKVQVDIADIDKFFEAEEVDPDKLVSRPPVVTIMGHVDHGKTTLLDTLRHSRVTSGEAGGITQHIGAYQIDIDGKPITFLDTPGHAAFTSMRARGASITDITILVVAADDGVMPQTVEAINHAKAAGVPIIVAVNKIDKPGANPQHVMQELSEYEL…
321	AMQ97453.1	glcK	glucokinase	0.0254	33762	4.73	Cytoplasmic	320	MDKKIIGIDLGGTTAKFAILTPEGEIQQKWSIDTNILDDGKHIVPEIIESINHRLNLYNMKAEDFIGIGMGTPGSVDSEAGTVIGAYNLNWTEVQFVKKLIEAGTGIKFAIDNDANVAALGERWKGAGENDPDVVFVTLGTGVGGGIVAGGNLIHGVSGAGGEIGHITVDPEGFECTCGKRGCLETVSSATGVVRLGRFLAEEYAGDSKLKAMLDNGEEVTSKDIFEMAQEDDPFALMVVDRVCFYLGLACGNLGNTLNPSSIVLGGGVSAAGEFLRSRVEKYFKEFTFPQVRESTKIKLAELGNEAGVIGAASLALKFA
322	AMQ96146.1	fusA	elongation factor G	0.0254	76663	4.81	Cytoplasmic	695	MTREFSLQNTRNIGIMAHIDAGKTTATERILYYTGKIHKIGETHEGASQMDWMEQEQERGITITSAATTAQWKGHRINIIDTPGHVDFTVEVERSLRVLDGAVTVLDAQSGVEPQTETVWRQATTYGVPRIVFANKMDKIGADFLYSVSTLHDRLQANAHPIQLPIGAEDDFTGIIDLVTMKAEMYTNDLGTEIEETEIPEEYRELAEEWREKLVEAVAETDEELTLKYLEGEEITEAELKEGIRRATVNVEFYPVLCGSAFKNKGVQLLLDAVLDYLPSPLDIPAIKGIDPKTDEEVERPADDSAPFSALAFKVMTDPFVGRLTFFRVYSGVLQSGSYVQNATKGKRERVGRILQMHANSRSEISEVYAGDIAAAVGLKDTTTGDTLCDEKSLVILES…
323	AMQ97112.1	fabZ	3-hydroxyacyl-[acyl-carrier-protein] dehydratase FabZ	0.0254	16173	6.11	Cytoplasmic	146	MSYVLSATEVMELIPNRYPICYIDYVDTLEPGKKIVATKNVTINEDFFQGHFPDNPVMPGALILETLAQAGSILILKSEEFLGKRAYIGGINKAKFRQKVVPGDVLKCHFEITKMKGSVGTALSAAYVDDKKVCECEFTFIVNQNA
325	AMQ97149.1	cshB	DEAD/DEAH box helicase	0.0249	51309	9.6	Cytoplasmic	449	MNNFDIFRFKPFINEALTAKGFKQPTEVQERLIPLIAKGKNIIGQSQTGTGKTHTFLLPLFEKINAEKEEVQVVITAPSRELAAQIYEAATQIAKFSTPEIRVSNFVGGTDKQRQLNRLHHQQPQVVVGTPGRILDMMNEQALKIHTAFAFVVDEADMTLDMGFLNEVDQIASRLPEKLQFLVFSATIPEKLRPFLRKYMENPIIEEIKPKAVISEDIENWLISTKGKDENQMIYQLLTIGHPYLAIVFANTKQHVDEIADYLKNQGLKVAKIHGDITPRERKRVMRQVQNLEYQYVVATDLAARGIDIEGVSHVINAEIPEDLDFFIHRVGRTGRNGLKGTAITLYSPNDEQAIDAIEKLGVSFEPKEIKNGEIVKTYDRNRRAKREKSKDVLDPTLI…
327	AMQ96141.1	gpmA	phosphoglyceromutase	0.0243	25939	5.08	Cytoplasmic	228	MPKLVFSRHGLSEWNALNQFTGWADVNLAPEGIEEAKEGGRKIKEAGIEFDVAYTSVLTRAIKTCNLILEYSDQLWVPQIKSWRLNERHYGKLQGLNKKETAEKYGDEQVHIWRRSYDTLPPLMEETDEGSAANDRRYAMLDKRDIPGGENLKVTLERALPFWQDEIAPALLDNKTVLVAAHGNSLRALAKHIEGISDEDIMDLEIPTGQPLVYELNDDLTVAKKYYL
328	AMQ96840.1	fabH	3-oxoacyl-ACP synthase	0.0243	35026	6.22	Cytoplasmic	320	MEQFGMITATASVLPEKIITNNDLSKMMDTSDEWISSRTGIRERRCVTNQETSDLCILVAEKLIKQKNLNPKDLDFILVATMSPDYTTPSVAAQVQGKLGATHAIAFDISAACSGFVYALSMAEKMIRCGSTKGLVIGGETLSKLIDWSDRTTAVLFGDGAGGILLEANPQKKLLKEKLAADGTRSSSLTAGYQQNKNPFYSEDSEGSYYLQMTGRDIFDFAVRDVANNIQEVMKDKPVDYLLLHQANLRIIEKIARKVKMPQEKFLTNMDKYGNTSAASIPILLDEAVSSGKITLGKQQKVIFTGYGGGLTWGSILMEL
330	AMQ98512.1	AS238_12800	portal protein	0.0238	44192	5.39	Cytoplasmic	395	MEKRGYIEDIFGHYTRYGQRYVTDSSIMESSDVYELVQDISNQVALATPIVIGPDGNEVKDHHLLKILKSPNDYLTGFEFTKLETNTLLINGETFPLTDRDQLHLAYGVTTKINERLQEEFEMNGQKIPGQMIRHIKNIGTDSLKGAGIIDLARNTLEGVLSAEKVLTDKYTKGGLLAFMLKLDAHINPNNSAQTKIVKAILDQLEGTQNESDHSVKMIPLGKGYSIETLKSPVDDAAILNYLGVYKKDLGKFLGINVDTYQSLMKTDIEKAMMYLHNKAIKPILKNKSEHYTALFFMPNSGYRVEWKINILDFVPYSTKTNIGYNIVRTGITSPDNVAEMLGFPKQNTPETQAIYISNDLSRIGQKNATDDSLPTNDQDLKGGEGNEEEGNSHD
331	AMQ96729.1	B1P95_06690	hypothetical protein AX771_03705	0.0238	17366	8.91	Cytoplasmic	153	MEKEILIKSPGKTLIKVTDDSISIIRKGFINLVNQGIKGEKTIPFKNISAVQLKKPGMSNGYIQFTLLGGNESRGGILAATKDENTVMFTKKYWNEMENLKKYIEKQQSILDNNSKETQISSADEIKKYKELLDEGIINQEEFDFKKKELLGL
334	AMQ96105.1	gyrA	DNA gyrase subunit A	0.0232	91733	5.52	Cytoplasmic	823	MSEEIRENIHDVNLTSEMKDSFIDYAMSVIVARALPDVRDGLKPVHRRILYGMNELGVTPDKAHKKSARIVGDVMGKYHPHGDRAIYESMVRMAQPFSYRYMLVDGHGNFGSVDGDGAAAMRYTEARMSKIATEMLRDINKNTVDFQSNYDDTEKEPVVLPARFPNLLVNGTTGIAVGMATNIPPHNLSEVVAAIDLLMDNPDVTTNELMEVLPGPDFPTGGLVMGKSGIRRAYETGKGSITVRAKVEITEMPNGKERIIVTELPYMVNKAKLIERISELHRDKRIEGITDLRDESSREGMRIVIDIRRDASASVILNNLYKLTSLQNSFGFNMLAIEKGVPKVLSLKQILENYIEHQREVITRRTVFEKEKAEARAHILEGLRIALDHIDEIIAIIRG…
335	AMQ96795.1	AWT83_15040	teichoic acid ABC transporter ATP-binding protein	0.0227	46074	5.05	Cytoplasmic	406	MTEYAIRLKDITKSYNMYAKPSDRFREALNPFKKSYHDVFYALKNVNVEIKKGEMIGFVGENGSGKSTMLKIITGVLTPTSGTMEIEGKISALLELGSGFNPEYSGYENIYLNGMVLGFSREEVDEMVDDIIEFADIGDHIYQPVKTYSSGMFVRLAFAVAINVNPDILIVDEALAVGDLEFQLKCMEKFTEIKNSGKTILFVSHDISSIRRFCDRSYWLKNGKVVEYGDTMEVTTNYENFLKKKSVKTVDRNKNQVERFAAPDIVDVTKAELLDKDKNPVDMLEQGEKLYVKVTYEVKDDTIKNPVLGIALRTVDNFYVCGLNTLLDGIKIPWKKGENIFYLEYEKLGLLAGEYYFDVAVFEENATVPLVYKTKYMNLFVSGSYIGEGIVVLDHKWEE…
337	AMQ96107.1	ssb	single-stranded DNA-binding protein	0.0221	18441	4.89	Cytoplasmic	170	MINNVVLVGRLTKDPDLRYTASGTAVATFTLAVNRNFTNQSGNREADFINCVIWRKSAETLANYARKGTLLGVTGRIQTRSYDNQQGQRVYVTEVVADNFQLLESRSASENRQQSGGFQSSGQSAGGFGGNNNSNQTSQSSNGMPDFDRDTSDPFGSSSTIDISDDDLPF
340	AMQ96548.1	AS238_08960	DNA-binding protein	0.0215	28535	7.66	Cytoplasmic	244	MIKRPPINYLERKKILGTKIKAIRKSKKLTQPAFGLMINNGQLIDKKTIYEWEKGTYLPIPERLSRIADLRNMSIEELVCGNVEEYILGIILYRDSIVLDGITFPDKNLFQHLRQQFPPVHSNLDTWLDRYSKLEPEMQEFIANKTCNKVKNEKISLFNILKIEELFINAIVEEFDNNILFLTSSIEELLERMVDEWLPIQLKDMSYPEEAVREITDNINKLEQTISSIGKKYTKKKMKGGDTI
342	AMQ97178.1	cmpD	ABC transporter ATP-binding protein	0.0215	28803	9	Cytoplasmic	256	MTDILTIKNGRKVVNNGMNEEKVLLDEINLTIREGDFITVLGGNGAGKSTLFNTIAGTLQLSQGSISFKDQLITKDSEEKRARFLSRVFQDPKMGTAPRMTVAENLLLAQKRGQKRKFRLRNLKNQKEDFFRLCQEVGNGLEQHLDTPAGELSGGQRQALSLLMATITAPELLLLDEHTAALDPKTAKALMRLTNQRINEQKLTCLMITHRMEDALKYGNRLIVLQKGKIVQDISEKEKQHLTMGDLLQFFEEVVD
343	AMQ97601.1	AWT83_10105	MarR family transcriptional regulator	0.021	19391	8.65	Cytoplasmic	169	MVQGIERGVYVVDKIQFNQVIEEFIKVNNLMTHIQKRPIRITNDLKLSTSMIHLIDVIGNYPETSITELADRLGVTKGAVSQQIPTLEKMNLISISQKKGNKKTKLVSLTKYGRKVYESHNYLHEELYSSINEALESFSPDQISTIKQILEKVSYTINEYQVSLTRKED
345	AMQ98329.1	proB	gamma-glutamyl kinase	0.021	29288	5.5	Cytoplasmic	268	MRKEIKNAKRIIVKVGTSTLIYPNGNINLAAIDQLAFVLSDLRNRGKEVILVSSGAVGVGMHKLHLSERPTLIPEQQAAAAVGQAELMNIYNQRFSVYNQQTAQILVTRDVVDYPESRKNVRNTLEQLLIMDTIPIVNENDTVAVDELDHLTKFGDNDQLSAIMAKLVAADLLIVLSDIDGFYSDNPTTNPEAQMYRYIDKIDEKILAQAGGAGSTFGTGGMQSKLKAASRIFEANSAMILANGKNPAIIFDILAGKEVGTLFKEDLK
346	AMQ97076.1	rpsT	30S ribosomal protein S20	0.021	9185	9.99	Cytoplasmic	84	MPNIESAIKRVRTSENANVKNSSQTSAMRTAIKKFEDAVASGADNVDALYKEAVKAIDMAESKGLIHKNKANRDKSRLSKKIAK
347	AMQ98598.1	rpiR2	RpiR family transcriptional regulator (plasmid)	0.0204	30353	6.92	Cytoplasmic	272	MSYIYLIKENYPFLTKSEKKVADFILNSGKTIIYSTMSDIKKNTKVGDATIIRFCQKIGFSGFSDLKIEIAKEDFSQKKEHPTSVKYYDEIANSLTEALYSTIRLLDEEKLNEAIKMITQSKNIYIFGVGSSGNTSLDLENMFLRVGVQAKAVLDPHFQAQVASLLTVNDLVIIFSLSGKTKDTYDSLKIAKKNGAKIIAITNYIHSPIGKSADLVLQTAIEEFLNGGSLAGKISQLYICDLLVHGYEQNNNIDSVELREKVLRSIIDKSIE
350	AMQ96256.1	WP_002293424.1	D-alanine--D-alanine ligase	0.0204	40221	4.85	Cytoplasmic	358	MKITLLYGGRSAEHEVSILSAFSVLNAIYYNYYQVQLVFITKEGQWVKGPLLTEKPASKDVLHLSWDPSGQTEEGFTGKVINPGEIKEEGAIVFPVLHGPNGEDGTIQGFLETLNMPYVGAGVLTSACAMDKIMTKYILQAAGVPQVPYVPVLKNQWKENPKKVFDQCEGSLLYPMFVKPANMGSSVGITKAENREELQNALATAYQYDSRAIVEQGIEAREIEVAVLGNEDVRTTLPGEVVKDVAFYDYEAKYINNKIEMQIPAEVPEEVYQKAQEYAKLAYTMLGGSGLSRCDFFLTNKNELFLNELNSMPGFTEFSMYPLLWENMGLKYGDLIEELIQLGMNRYHQRQSFFEKNE
351	AMQ97261.1	gls20	stress response regulator Gls24	0.0199	20478	4.7	Cytoplasmic	185	MENKNMNTTNGSVLANEKGENRMMNGELTYEDKVIQKIIGYALKDVDGLLTLDGGFFSNMAEKLVNTDNVTAGINTEVGKKQVAVDLDVIVEYGKDIEDIYNQIKELISTEVNNMTHLDVIEVNVNVADIKTQEEYQKDQETVQDKVTEAAKSTGQFASRQTDKAKSAVGKGAQKVKENNEPRVQ
352	AMQ98761.1	BU192_05740	hypothetical protein AX771_15385 (plasmid)	0.0199	9790	8.53	Cytoplasmic	84	MYNVGDQIDEIVKIGNVKLVKSKYYISETEIIFNTESGCILIWKLPFPKDETTLKKINTLKIRYCIHEIIDKNTYVINQVKVMG
354	AMQ96975.1	AS238_14640	EDD domain protein	0.0199	31039	5.77	Cytoplasmic	280	MTNVKIVTDSSCTMEKNVRDALGIRVMPLSIMIDGTVYPDDDQLDGERFMEMMAKAKNLPKTSQPPIGEFISMYDELGEDGSEVISIHMTKGLSGTVEAARQASNLTKTKVTVIDSDTTDQGLSFQVIRAAELAKEGKTVEKILEEVKKVQDNTKLYIGISTLDNLVKGGRISRTTGLLSSVLNIRVVMNFAHSELIPVTKGRGKKTFDKWFNNLKNELKELPNVRQIGISHADAKELAQEFKEGLQELFPDMHIPVLHTNPVIATHTGKDAFAIMYYVD
355	AMQ98790.1	aphA	aminoglycoside phosphotransferase (plasmid)	0.0199	30954	4.54	Cytoplasmic	264	MAKMRISPELKKLIEKYRCVKDTEGMSPAKVYKLVGENENLYLKMTDSRYKGTTYDVEREKDMMLWLEGKLPVPKVLHFERHDGWSNLLMSEADGVLCSEEYEDEQSPEKIIELYAECIRLFHSIDISDCPYTNSLDSRLAELDYLLNNDLADVDCENWEEDTPFKDPRELYDFLKTEKPEEELVFSHGDLGDSNIFVKDGKVSGFIDLGRSGRADKWYDIAFCVRSIREDIGEEQYVELFFDLLGIKPDWEKIKYYILLDELF
358	AMQ98123.1	AS238_09695	fatty acid-binding protein DegV	0.0193	31626	5.1	Cytoplasmic	286	MKNNKIAILVDSGTDVPEELIKKYEMYMIPLKIIYKDQVYTDKIDITSEEIYQRLPEEIPGTSLPDGESITEIFEQIKKDGYEKVLAVTISSGLSGTYNVVRLIAQQQEELEAYVLDTKNIGIGAGFSAIQAAKWLEEGVEWDQLISNLNELVERTKVFFNVATLEYLQKGGRIGLVASIVGTALKLNPIISCNEEGIYYTVGKARGRKKSLDKTVAYVKEKIGNAKVFNLAVAHGDAKEEAIEMEARLKREFPQANQIYFGQISPALVVHTGPGLLGVGVQVLEG
359	AMQ98604.1	AS238_14190	cytoplasmic protein (plasmid)	0.0193	20726	6.86	Cytoplasmic	172	MRTYKNKEELKKEINRTYTKYILEFETIPEELKDKRVEEVDRTPAENLAYQVGWTNLILKWENDERNGLSVKTPSDQFKWNQLGELYKWFTNTYAHLPLKELEEILNRNIDDINMMIDSMSDEDLFTAHKRKWADEATKTAVWEVYKFIHVNTVAPFGTFRTKIRKWKRLAL
362	AMQ98100.1	CUS93_13650	replication protein	0.0182	33208	8.94	Cytoplasmic	283	MADNKRYYYLKLKENFFDSDEMVLLESMPDGYIYSNILLKLYLRSLKHEGKLMFNDRIPFNSTMLATITRHSVGVVEKAVQIFRDLQLIEVLDNGAIYMSDIQSFIGKSSTEADRKRKYRKEIEEAKQNLITSGQMSDKCPDKTTPELEIELEKDIELEKDIENVTPPKKSKAKPIRHKYGEYKNVLLSDEQMEKLKTEFPNDYQERIERLSEYCESSGKTYKNYLATIRSWARKEKSEPKNASGAYKRTGRREKLPEWAIDQEAYQKKKALERANRQSKAPF
363	AMQ97767.1	atpA	ATP synthase subunit alpha	0.0182	56420	5.01	Cytoplasmic	518	MAIKAEEISALIKEQIENYQNVLSVEEIGTVTYVGDGIARAHGLENAMSGELLEFSNGSYGMAQNLESNDVGIIILGDFESIREGDKVKRTGKIMEVPVGEALIGRVVNPLGQPIDGLGEIVTDKARPVEAMAPGVMQRKSVNEPMQTGLKAIDALVPIGRGQRELVIGDRKTGKTSIAIDTIINQKGQDMICIYVAIGQKDSTVRTQVETLKKYGAMDYTIVVNAGASQPAPLLYIAPYAGTAMGEEFMYNGKHVLIIFDDLSKQAVAYRELSLLLRRPPGREAYPGDVFYLHSRLLERAAKLSDDLGGGSMTALPFVETQAGDISAYIPTNVISITDGQIFLESDLFYAGTRPAVDAGLSVSRVGGSAQIKAMKKVAGTLRLDLASYRELEAFTQFG…
364	AMQ96685.1	rpmA	50S ribosomal protein L27	0.0182	10421	10.28	Cytoplasmic	97	MLLSMNLQLFAHKKGGGSTSNGRDSESKRLGAKRADGQTVTGGSILYRQRGTKIYPGVNVGIGGDDTLFAKVDGVVRFERKGRNKKQVSVYPVAQEA
365	AMQ97810.1	ecsA	sodium ABC transporter ATP-binding protein	0.0177	33959	5.57	Cytoplasmic	299	MLEVKDLVKTFGNYTAVDHVSFQIPDGKIMGLIGQNGAGKTTTFRLILDFLTQDQGEVLWNGHHLGEKDYDVIGYLPEERGLYPKVTIQDQLLYFAELRGKSRKEIEPKIDFWMEKFQVKGKKTDKVKSLSKGNQQKVQLIATLIHEPKLIILDEPFSGLDPVNAELLKDGILELKKHGSCVIFSSHNMDNVEKICDHLIMLRNGKMVLNGKVHEIRESFGRTKLFLESGLSQQEVEEIEGVKKVILHEDNTLEITLEDPEAGKEIFTRATQFGYIPMFNQQPPTLEEIFKLKAGEIDA
366	AMQ98309.1	rny	ribonuclease Y	0.0177	57984	5.35	Cytoplasmic	518	MVFNILLAIIGLIVGLGLGFMVAKSRHEKEIAGAQSSAAGIIDSAKKEAETLKKEALLEAKEENQKYRSEVESELRESKLELKSQENRLIQREQTLNRKDDSLEKRENSLESKEEALSSKQQLIEEREKDVEKMIEDQQKELEKIAGLSKEDARDVIMKSTEEELNHELTLMVKESEQRAKEEADRKAKNLLSLAIQRCAADQVSETTVSVVTLPNDEMKGRIIGREGRNIRTLETLTGIDLIIDDTPEAVVLSGFDPIRREIARMTLEKLIQDGRIHPARIEEMVEKSRKEMDERIREYGEEAAFEVGAHTLHPDLIKIIGRLRFRTSYGQNVLKHSVEVAKLAGILAAELGEDIQLAKRAGLLHDIGKALDHEIEGSHVEIGAELAAKYKENPVVIN…
369	AMQ96223.1	ruvA	Holliday junction ATP-dependent DNA helicase RuvA	0.0177	22479	5.69	Cytoplasmic	200	MYEYLTGVVTFINPYYIVVETNGIGYQIALGNPYRYSSKLNQKIKIYVHQVIREDAHLLYGFDSLEEKQLFLRLVSVSGIGPKSALAIMASEDHSGLIQAVESSDVTYLTKFPGVGKKTAQQMILDLKGKFGELSIDTPFSLFDEANTKDATALSEAMEALSALGYSDREIKRVEKQLKEVDNQTTDEYLRQALKLMMKK
373	AMQ97397.1	whiA	sporulation regulator WhiA	0.0171	35466	8.86	Cytoplasmic	311	MSFAADVKKELTGLEVHREHAKAELAALLRMNGSLGIVNQQFILNVQTENAAIARRIYSLLKDHYQVRSELLVRKKMKLKKNNVYIVRLKQGTKDVLMDLDIMDGMMFNGHVSDEIMGNSQKMRSYLRGAFMASGSVNNPETSRYHLEIFSIYEQHNQDICDMLNYYGLHARTLERRNGYISYLKGAEKIADFLTLIGATNSMLRFEDVRIVRDMRNSVNRLVNCETANLNKTIDAASKQIENIELIEAKVGLHALPEKLQEIAELRLQHPEVSLKELGEMIPSGAISKSGINHRIRKINEFAEKLREEAV
375	AMQ96278.1	aad	bifunctional acetaldehyde-CoA/alcohol dehydrogenase	0.0171	94491	5.76	Cytoplasmic	865	MAKVIEKEKTKTIDVQAMIDDLAEKANAALKEMESFDQEKVDHIVHEMAMAALDQHMPLAKMAVEETGRGVYEDKAIKNMYASEYIWHNIKHDKTVGVINEDVQKGLIEIAEPVGVVCGVTPTTNPTSTTIFKSMIALKTRNPIVFAFHPSAQKSSAEAARVVRDAAIAAGAPENCIQWIEHPSIEATSMLMNHPGIAIVLATGGAGMVKSAYSTGKPALGVGPGNVPAYIEKTAKIKRAVNDLIVSKTFDNGMICASEQAVIVDKEIYAAVKAEFQAHQVYIVKPDELQKLEDAVMNEGKYAVNPSIVGHSAMEIAKLAGISVPKGTKMLIAELEGVGPDYPLSREKLSPVLAMIKANNTDHAFDLCEGMLNLGGLGHTAVIHSENEELHVKFGLRMK…
376	AMQ98352.1	yadG	ABC transporter	0.0171	35396	5.69	Cytoplasmic	311	MANALEINNLKKIYGSGVEALRGIDLSVKEGDFYALLGPNGAGKSTTIGIITSLVNKTSGKVNVFGYDLDKDLVRAKQQIGLVPQEFNFNPFETVQQIVVNQAGYYGVSRKEAMKRSEKYLKQSNLWEKRNVRARMLSGGMKRRLMIARALMHEPRLLILDEPTAGVDIELRREMWEFLRELNENGTTIILTTHYLEEAEMLCRNIGIIQSGELIENTSMKELLSKLQFETFIFDLAPYDTKPVIEGYACTFEDEQTIAVEVERNQGVNGIFDQLTRQGIKVLSMRNKSNRLEELFLKITEENNHTEEKNV
378	AMQ97006.1	AS238_12560	proline/glycine betaine ABC transporter ATP-binding protein	0.0166	36716	5.38	Cytoplasmic	321	MTKLIEFKHVQKKYDGKYVIDDLNLAIKKGEIFVLVGPSGSGKTTTLKMINGLSKPSAGDIYFKGKSLNEYNLQKMRWNMGYVLQQIALFPTMTVKQNIEVIPEMLGWEKQKRADRVDELLQKVGLSPDIYRDRMPRELSGGEQQRIGIIRAIAASPDVILMDEPFSALDPISRNSLQELVLSLHEELGTTIVFVTHNMEEAIKLGDRIAFMKDGEIIQCDTPEQLLMNPKNDYVRHFFDEPKQTKEWRVEDLVVNGYFLNEIPENARQQVCFDTPMKEVYSLLSVYPSIVIVEKQRSIGSLTSKEIFAFLSREEEGNENI
379	AMQ98636.1	AWT83_16000	hypothetical protein AX771_14695 (plasmid)	0.0166	23497	9.4	Cytoplasmic	197	MRVKGQNSVDKKSIFQFGKPEERSILDLFPYKSCTEEGVLVTKEDHFQRYYRVVSTDVEGLNEQEKLERMNQLTTVMRTYVPTIKLVSLTTETDLTEQIVQKRQLLDKNRMEQSLGRNLQRLRKYEKKLVEEIQELKRAEQERPDLSFFFIIEGRTIKDLQTRNRQLMRSSGILGLKPLYKKELIKILYRMNNMNDE
380	AMQ97398.1	AS238_11645	hypothetical protein AX771_07675	0.0166	36703	5.5	Cytoplasmic	332	MKMKTYRIRKPKIVVVGGGTGLPVILKSLRNQGADITAVVTVADDGGSSGAIRESIAMAPPGDLRNVLVALSDMPQFYEDIFQYRFKKEDQFLANHTIGNLIIAAVSEMRGSTYEAIQLLAKMMHVDGHVYPSSETPLTLHAVFKDGTTAVGESKIAINRKTIDRVYVCNTNDKSEAKAARKVVSAIMDADMVVLGPGSLFTSILPNLVIPEIGEAMLKTTAETVYICNIMTQKGETEHFTDADHIRVLHKHLNQPFIDTVLVNTEKVPEDYMDPEIYDEYLVQVAHDFNGLRNEGCRVISTDFLELKDGGVFHDGDKVVEELFRLVFGSKY
383	AMQ97117.1	gap	glyceraldehyde-3-phosphate dehydrogenase	0.0166	36134	4.92	Cytoplasmic	336	MTVKVGINGFGRIGRLAFRRIKEVSDDIEVVAINDLTSPTMLAQLLQFDSTHGTYPGTVTATEDSIVVDGEATRVYAEPDASKIPWAKENGVDIVLECTGFYTSEEKAKAHLDAGVKRVVISAPAGAMKTIVYNVNDDTLDENDKIISAGSCTTNCLAPMAYFLNNEFGIEVGTMTTVHAYTSTQMLLDGPVKGGNLRAARSAADNTIPHSTGAAKAIGLVIPELQGKLQGHAQRVPVVDGSLTELVSVLKTKVTADQVNEAIKKHTVDNPSFGYDDRQIVSSDVIGTTQGSIFDPTQTEVTTAGDFQLVKTVAWYDNEYGFTCQMIRLLEKFANL
386	AMQ97335.1	murC	UDP-N-acetylmuramate--alanine ligase	0.016	49570	5.22	Cytoplasmic	444	MENQNKLYHFVGIKGSGMSSLALVLHEQGLNVQGSDIEKYFFTQRDLEKANITILPFNADNVKPGMTIIAGNAFPDSHEEIQRAKELGLEVIRYHDFIGHFIQNYTSIAVTGSHGKTSTTGLLSHVLSGVRPTSYLIGDGTGHGDPQAEFFSFEACEYRRHFLAYSPDYAIMTNIDFDHPDYYTSIDDVFTAFQTMAGQVKKAIFAYGDDAYLRKLKANVPIYYYGVTENDDIQARNIERTTSGSAFDVYHGDEFVGHFTVPAFGKHNILNALGVIAVAYFEKLDLKEVAEEMLTFPGVKRRFSEKIVADMTVVDDYAHHPAEIKATIDGARQKYPDKEIIAVFQPHTFTRTIALMDEFAEALDLADKVYLCDIFGSAREEQGNVKIEDLGAKIKKGGE…
387	AMQ96757.1	clpP	peptidase S14	0.016	24658	4.64	Cytoplasmic	228	MTTMKTFLAVKNEGAVPQIFIQGFIGSSWFFEGNTDKGIKNILDSLGDQEEIEVVINSNGGDVFQGIAIGNLLKSNKAKVNVVINGLAASAASIIAMAGDTIKIYNNAQLMIHRASTYGEGNVDDFRTIADQLESIDKSVKASYKTRFNGTDEALQELLEKESFMDAETALSYGLVDEIIDAENSSGTEAKKEQSVEEILNDVKEKRAEKIAAFTAALNKTFGQGDVK
389	AMQ98510.1	AS238_11080	hypothetical protein AX771_08095	0.016	63561	5.49	Cytoplasmic	565	MVLSTTEPNNGINLVRIRQGDVLTQKFVVEVVEHGKLKTFEGLVPFFINTTKFGENQPVEQKVQEYSPAQARLVYTLSEPDWQWGGENTAHFSFRSLNGDGTWSEQFSTQDFTYRVISGISRSQLRDSGYVWTFEDLLRKFKDYMDQGKNDWEQWLEDNREILENIDPGGMIINILNEAKGDYESLADRLNQKYQVPVGSSQIRETTRFFDYDTMKYVDLVPRNLNTVVNSVNNSKFNFSFITDIHADNHNLRIDGVGYKDASYLRHWRAIPQFQKLGNKTDVMIYGGDNIDGGLGSLGSDIGIIDEWSARHSMLGTLKRFTNAAVAGQEKPVIICKGNHDACFDPAWRKRKGMLCNADFEEYWNGLYGGVLFPDKNAAIYRFDTCDFYEGGTGDKYTD…
394	AMQ97801.1	atpB	ATP synthase subunit B	0.0155	51058	5.15	Cytoplasmic	458	MIKEYRTIGEVVGPLMAVEKVAGVKYEELIEVRMQNGEIRRGQVLEVQEDKAMVQIFEGTSGINLRDSSVRFLGHPLELGVSEDMIGRVFDGLGRPKDNGPEILPEKHLDINGEVINPVARDYPDEFIQTGISAIDHLNTLVRGQKLPVFSGSGLPHKELAAQIARQATVLDSSDDFAVVFAAIGITFEEAEFFMEDFRQTGAIDRSVMFMNLANDPAIERIATPRMALTAAEYLAYEKGMHVLVIMTDMTNYAEALREISAARREVPGRRGYPGYLYTNLATLFERAGRIRGLKGSVTQIPILTMPEDDKTHPIPDLTGYITEGQIILTRELYKSGIQPPIDVLPSLSRLKDKGTGPGKTREDHAATMNQLFAAYAQGKQAKELAVVLGESALSDVDK…
395	AMQ98437.1	vanR	PhoB family transcriptional regulator	0.0149	25857	5.25	Cytoplasmic	229	MKILIADDDKEIVELLSIYVHNEGYEAVKAYDGKEALSKIRTIPDIELLILDIMMPEMDGMQVVKELRKESQIPIIMLTAKTTDMDKIKGLVAGADDYVTKPFNPLEVMARVKSLLRRTKMQIAPDQPDVLEVNALIINKDSHEVKTIDGKEIQLTALEFGILYLLASHPNRVFSADEIFERVWKQESIVSAKTVMVHVSHLRDKIEEATGGEKVIQTVWGVGYKIDAR
397	AMQ98210.1	AS238_07985	hypothetical protein AX771_12500	0.0149	12741	4.95	Cytoplasmic	114	MIKNFFKGLLFGAAAGTVGGLLLAPRSGNETRKKLIEELEEATTLTNDLNNSLNHFKSALIETKETAESVIPAFQEAIKKDIEDFKFQAEPRITQINEQVEKLKADLPEYPEQI
398	AMQ97346.1	AWT83_11410	hypothetical protein AX771_07365	0.0149	26257	9.4	Cytoplasmic	223	MNFLVVLKDTLIERSTFLYVQLQENKTLLHFSPEFHLEGLTLGEIYQAEGLSAVLHFFKVELELPVKDYIELSLESWDRAVVELFPEGLMIDTNDGKIHLTAAELQKQMRYQIDDENSFSIFRRQQKILKSFLKVISKKRNLIKTTQLLKKYPGLLHTSIQFPQLITMIHRFIRMQQLPSKKLFLPLTDTFRVVNREDKKKVIVIDFTRNRNVLHQVAMEKAN
403	AMQ97274.1	AS238_08240	hypothetical protein AX771_06940	0.0144	13308	4.97	Cytoplasmic	116	MEITMSKNAVETLIEKVGENTKIALALINDSDPFLRDKGAFAKGSFFQIIPFVSEFGEYATKIEHPLLDIYTSKLEQNYFGKRLNMDFNKQLDSFSLENEIAVLDYNIKLKNCFFS
404	AMQ98495.1	holA	DNA polymerase III subunit delta	0.0144	40715	5.37	Cytoplasmic	348	MVSNLSIQAELQKIRKEKLASCYLILGTEKFLQDQVRTEIVKKIQLEGEDDLNFLSFDMENASLDEVVAEAETLPFFGDQRLVFVENPYFLTGEKVNNGIEQNTDLLTAYLKEPLESTVLVFFAPYEKLDERKKVTKQLKKTAIIINVQQLNEKEVRQYLMNTLENSSIKMERSAIDLFLRLTDLDLSKMMRELQKLVLYGQNQQQITVREVEELVPKTLEHNIFDMTQYILKGKTEQALRLYEDLVMQGEETIKINAILLSQLRLFLQTKFLVKIGYQQANIAETLKIHPYRVKLAMQEVKKFDEHLLVQLFDQLVEMDYQIKTGQIEKELSFQLFVLRTGQLLRNR
405	AMQ96457.1	metB	cystathionine gamma-synthase	0.0144	41621	5.35	Cytoplasmic	381	MHIQTKLIHGGISEDPTTGAVSVPIYQTSTYRQDGVGQPKQYEYSRSGNPTRFALEELIADLEGGVRGFAFSSGLSGIHAVFSLFQAGDHILLGDDVYGGTFRLFDKVLTKNGLEYTIIDTSNLDKIEQSIKPNTKALYLETPSNPLLKITDLEKSATLAHQHGLIVIADNTFATPYFQRPLDLGSDIVVHSGTKYLGGHSDVVAGLVTSNHKDLADQIGFYQNAIGAVLGPQDSWLLQRGIKTLSVRMEEHQKNAFVVADFLFSHPAVEKVYYPGLPDHELHGVAKQQMSGFSGMISFTLKNEESAIPFVESLQLFTLAESLGGVESLVEIPSVMTHASIPKEKREEAGIKDGLIRLSVGIEYGQDLINDLAQAFDRIKN
406	AMQ96670.1	nrdD	anaerobic ribonucleoside triphosphate reductase	0.0144	83456	6.09	Cytoplasmic	729	MKVNYEEKTVVTQQPETSQMKVIKRDGRHVDFDEQKINEALIKAEKKIHGSLSPLTYEKIQMIADLVVQEIKSRFAENVKIYEIQNIVEHILLEKNEYELAEEYINYRTKRDFARSKATDINFSIEKLINKDQTVVNENANKDSNVFNTQRDLTAGIVGKSIGLKMLPPHIANAHQKGDIHYHDLDYHPYTPMTNCCLIDFKGMLNNGFKIGNAEVESPKSIQTATAQISQIIANVASSQYGGCSADRTDELLAPFAELNYKKHLKDAEEWIDSPERQKEYAKAKTKKDIFDAMQSLEYEINTLFTSNGQTPFTSLGFGLGENWFEREIQKAILQIRINGLGSEKRTAIFPKLIFTLKKGVNLNPEDPNYDIKQLALECATKRMYPDILNYDKIVELTG…
407	AMQ97251.1	psr	transcriptional regulator	0.0138	27941	7.6	Cytoplasmic	251	MKVSQKIILSILLLLTLVVGYFSIEFIHGFSSAKQSSTVKKVEPKSVPTTLNVALIGSDARSKDENGRSDSLLVAQYNQKTQQAKLISIMRDSYVDIPGYGMNKINAAYSYGGVDLLNQTLKENFKFEAPYYASITFQDFIDCVNELFPGGVKIDAEKSLDLDGVYINKGEQVMDGNTLLQYARFREDKEGDFGRIRRQQQVIKAISQQLKDVTSIFKLPKAVGKLLGSIQTNLPESVLLDCGMDFLKDIC
408	AMQ98102.1	HMPREF1359_02615	topoisomerase	0.0138	28405	5.52	Cytoplasmic	244	MSEGTKRNDNKLFNSLYKITVNDVVEKRNKLTYLSWAWAWAEVSKICEEVDYEIYRDPETHRPYLFDEKTGYMVFTSITVNGVKRDMWLPVMDGANKAMKDKPYTYEVNDYQWNNETKKKEIVGKIEKRVEAATMFDINKTIMRCLVKNLAMFGLGLYIFAGEDMPEDVSMLEPATQRSKKLFLDALQLVANKYDKSIDEAIVALTDAASITADDSKWTKRDLGILKRGVNWLEDQYREETKEK
410	AMQ97323.1	AS238_02820	NGG1p interacting factor NIF3	0.0138	42117	5.25	Cytoplasmic	373	MTISGRTFIQKFESYCPQWLAEEGDPVGLHIGTLDKPIQRVMMTLDVRPEVVEEAIKKKIDLLIAKHPPIFRPVKRLVTDQPQEKMYADLLKHDIAVYAAHTNMDIIWDGLNDWFCELLGIEVESYLVKTHEIHYKKLAVYVPVDHAQKMREVLAAAGAGTQGDYTGTSFTSIGHGRFTPEAGAQPAIGKVGKTEQVQEAKVEVILPETIEKQVIQAMRSAHPYEEPAYDLFAIDEPVEMFGLGRVGELPQEISIEAFVEQVKEAFQLDGLRIVQPKNAKSSVKRIAICGGSGEKFYPQAIAQRADVYITGDIYYHTAHDMQSAGLIAIDPGHYIESLCKQRFIEKFESWKQEENWDINFFVSETNTNPFQFN
411	AMQ96671.1	macB	multidrug ABC transporter ATP-binding protein	0.0138	28572	9.01	Cytoplasmic	255	MEKMIEVKHLSKSYGSKLSPVKALDNISFTVEEGEFVGIMGPSGAGKTTLMNILSTINLPTMGSVSIQGKEITKMKNSELSDFRRKKLGFIFQEFNLIDTLNAKDNILLPLAVERMTKEEMEKRVRHVAQLLNIEELLKRYPDELSVGQRQRIAAARALVVQPQVIFADEPTGSLDSKSATELLNYLKTMNQKEKATILLVTHDPYTASYCDRILFIKDGVIFSEVVRRGTRREFFEKVIDMQATIGGGGKMNAV
412	AMQ98793.1	ORF Y	methyltransferase (plasmid)	0.0138	28207	5.92	Cytoplasmic	244	MKENKYDDNIFFQKYSQMSRSQKGLAGAGEWETLKKMLPDFKGKRVLDLGCGYGWHCIYAMENGASSVVGVDISHKMLEVAKGKTHFPQIEYECCAIEDVDFPEESFDVILSSLAFHYVADYENLIKKIYRMLKAGGNLVFTVEHPVFTAHGTQDWYYNEKGEILHFPVDNYYYEGKRTAMFLEEKVTKYHRTLTTYLNTLLSNSFIINQIVEPQPPENMMDIPGMADEMRRPMMLIVSAKKKM
415	AMQ96933.1	AWT83_14090	3-hydroxy-3-methylglutaryl-CoA reductase	0.0138	43491	5.71	Cytoplasmic	401	MEKNVLTQETALIFQEQTLSEELSDHMIENQVSEVEIPMGIAQNFQINGKKKWIPMATEEPSVIAAASNGAKICGNICAETPQRLMRGQIVLSGKSEYQAVINAVNHRKEELILCANESYPSIVKRGGGVQDISTREFMGSFHAYLSIDFLVDVKDAMGANMINSILESVANKLREWFPEEEILFSILSNFATESLASACCEIPFERLGRNKEIGEQIAKKIQQAGEYAKLDPYRAATHNKGIMNGIEAVVAATGNDTRAVSASIHAYAARNGLYQGLTDWQIKGDKLVGKLTVPLAVATVGGASNILPKAKASLAMLDIDSAKELAQVIAAVGLAQNLAALRALVTEGIQKGHMGLQARSLAISIGAIGEEIEQVAKKLREAEKMNQQTAIQILEKIR…
417	AMQ98644.1	HMPREF1359_00227	hypothetical protein AX771_14745 (plasmid)	0.0133	28809	4.61	Cytoplasmic	253	MRNRKWLFVCAAALFSFTAYTQLTFADRQESTDSTEQIIQTSDSSTIQSSDETVDSSTVDSSEELKIAEDDQIVKQTIHVQKIISSEQLDNQGQKLEKQEGVNGAKFSVYDVSDILQKMDVKDLTTDQIESQLKDRVKKLFSDQLKLVSNGETKTIDQQTGVFEFSIEVQANQKQAYYIVNESSPENISNSEDILLLTPVSDKNDEFLKDVWIYPKSEASQPKEEVKKIVSTGVKKNFFENCWDFVTHLFSRD
420	AMQ96272.1	opuBA	glycine/betaine ABC transporter ATP-binding protein	0.0133	43986	5.44	Cytoplasmic	391	MIEFQNVSKIYKGGKVAVEDVNLSFEKGEFICFIGTSGSGKTTTMRMINRMTDPTQGKILIDGKSIQEIDPVELRRQIGYVIQSIGLMPHMTIRENITLVQKLLKVSQEERNKTAEKMIDLVELPREMLDRYPHELSGGQQQRIGVVRALAANQDIILMDEPFGALDPITRDSLQDLVKDLQERLGKTIVFVTHDMDEAIKLASRIAIMSEGRVIQFDTPENILRHPANDFVEELIGEDRLLQAKPNATRVGEVMLNTAITITPEKSLQEAIKLMREKRVDTLLVTDNSNVLKGFIDVETLNKKRGKVSSVGDILNKHVFYVKESAYLRDTLQRILKRGLKYVPVVDEQNKVVGILTRASLVDIVYDVIWGEDPATTDVAESATPEESKEV
421	AMQ97231.1	cfa	cyclopropane-fatty-acyl-phospholipid synthase	0.0133	44824	5.35	Cytoplasmic	388	MLEKTLYNQLFSRSFSLPVEVNYWDGTTKQYGDTDTPPQIKINIHEEIPMKEITSNASLALGEAYMDHRIEIEGSIQALINDAYQQANSFLRGKDYLKWLPKKEKHTKQKNKEDIHAHYDLGNDFYKLWLDPTLTYSCAYFNTPEDTLEQAQINKVHHILDKLFIKEGETLLDIGCGWGTLMFTATKEYNVKATGITLSEEQYDLITKRIKEEHLEDKCRVLLMDYRELKGETFDHITSVGMFEHVGSENLEGYFKVVKDLLKPKGTALIHGISRQQGGATNAWINKYIFPGGYVPGVTELVDNITKNDLQLIDLESLRRDYQLTLEHWTKNFHQVQDQVTKEMGDSFYRMWDLYLQACAASFESSNIDVIQYLLVQPGNNDIPMHRA
423	AMQ96176.1	rplQ	50S ribosomal protein L17	0.0133	14306	9.97	Cytoplasmic	126	MSYRKLGRTSSQRKAMLRDLTTDLLINERIVTTEARAKEVRSTAEKMITLGKRGDLHARRQAAAFVRNEVASVREENEDIVIESALQKLFNDIAPRYAERQGGYTRILKTEPRRGDGAPMVVLELV
424	AMQ97763.1	murA	UDP-N-acetylglucosamine 1-carboxyvinyltransferase	0.0127	46983	5.17	Cytoplasmic	433	MEEIIVRGGNQLNGTVRIEGAKNAVLPILAASLLAEEGITTLDNVPILSDVFTMNQVIRHLNVDVDFDEQKNQVTIDASRQLEIEAPYEYVSQMRASIVVMGPLLARNGHAKVAMPGGCAIGKRPIDLHLKGFQALGAKIIQKNGYIEAIADELIGNTIYLDFPSVGATQNIMMAAVKAKGTTIIENVAREPEIVDLANILNKMGAQVYGAGTETMCIEGVDHLHAVNHSIVQDRIEAGTFMVAAAMTQGNVLIADAISEHNRPLISKLIEMGAEIIEEEGGVRVIGPKHILPTDVKTMPHPGFPTDMQAQMTAIQLVAEGTSVVTETVFENRFQHLEEMRRMNAHVKIDGNVAIMDGNHELQGAEVYATDLRAAAALVLAGLKANGITRVRNLNYLDR…
426	AMQ98322.1	mrnC	Mini-ribonuclease 3	0.0127	15132	6.2	Cytoplasmic	131	MRDYTQLNGLALAYVGDAIYEIYVRDHLIDQGETKPNKLHRAATNYVSANAQAFLIQQMLEEHLLTEEEELYYRRGRNAKSHTSAKNADVTTYRVATGFEALMGYLHLTKQTERMEELIRWCIQKVGEKNG
429	AMQ97513.1	CUS02_09685	endonuclease	0.0127	14970	9.34	Cytoplasmic	126	MKYCQFDGCTNKIAKGIYCTEHKQSSKSRKKKQQAKSVYHHENKPFYRTQAWKDMRQFIYEREGGHCQRCGQFIFGKRAHVHHIVPIKDNELLKLDPNNLMLLCSKCHPIVENETEDKKVFPSYFN
433	AMQ96869.1	pyk	pyruvate kinase	0.0122	63608	4.81	Cytoplasmic	594	MKKTKIVSTLGPASNSVEIISQLIESGANVFRFNFSHGDHEEQLSRMTMVREAVKKTGKDVGILLDTKGAEIRTTVQGTTEADFGRAGYIKFEVGDQTRISMDPEHVGSKEKIAVTYPGLFDDVHVGGHILFDDGLIDMQIIEKDEANRELVVEVKNAGMLGSRKGVNAPGVSISLPGITPKDADDIRFGLDNDIDFIAASFVRKAQDVLDIREILEEKDMTHVQIFPKIESQEGIDNIDEIIKVSDGVMIARGDMGVEIPAELVPMVQKRIIKKCNAAGIPVITATQMLESMQENPRPTRAEASDVANAVFDGTDATMLSGESANGDYPVEAVSTMARIDQEAENALSELGTFQLNEFDKTDVTETIGLSVARAAKNLGVKTIVAATESGYTAKMISK…
435	AMQ97407.1	dnaK	molecular chaperone DnaK	0.0122	65644	4.6	Cytoplasmic	609	MSKIIGIDLGTTNSAVAVLEGNEAKIIANPEGNRTTPSVVSFKNGEIQVGEVAKRQAVTNPNTISSIKRHIGEAGYKVDVEGKSYTPQEISAMILQYIKGFAEDYLGEKVEKAVITVPAYFNDAQRQATKDAGKIAGLEVERIVNEPTAAALAYGLDKTDRDEKILVFDLGGGTFDVSILELGDGVFDVLSTAGDNHLGGDDFDNKIIDYMVAEFKKENSIDLSQDKMALQRLKDAAEKAKKDLSGVSSTQISLPFITAGESGPLHLEMTLTRAKFDELTADLVERTKVPVRQALKDAGLSQSEIDEVILVGGSTRIPAVVEAVRKETGKEPNKSVNPDEVVAMGAAIQGGVITGDVKDVVLLDVTPLSLGIETMGGVFTKLIDRNTTIPTSKSQVFST…
438	AMQ96694.1	asp	hypothetical protein AX771_03475	0.0122	15590	4.18	Cytoplasmic	141	MADEKNLILNANQDLGEIVIAPEVIEVIIGIAASKVEGVYGMRGTFASNVTELLGRAAHGKGVYLANEEDGLKVDLYCYLEYGVSVPKVAMEMQERVSQQVLFMTDIDLSEVNIHVVAVVPEKLEQPTIEELFEDEEEENE
439	AMQ97384.1	glmS	glutamine--fructose-6-phosphate aminotransferase	0.0122	65795	5.07	Cytoplasmic	601	MCGIVGMIGLKNVTPGLIDGLEKLEYRGYDSAGIFVSDGTTDYLVKAQGRIQNLKNKINIDTTGNIGIGHTRWATHGQPSEENAHPHTSQSGRFVLVHNGVIENFEELKIAYLANDHFIGETDTEIIAHLIETFAKDTTTQEAFLKALRVIKGSYAFALIDRTAPDVIYVAKNKSPLLIGLGDGFNVIASDAMAMLAHTKEFVEIEDEEMVTVTSEKVIIQNFAGDIVERSSFEAQVDASDIEKGTYPFYMLKEIDEQPIIMRRIAQKYVTEDNRVSLDQKLVDTLSDSDRIYIVACGTSYHAGLAGKQTLEKLTQIPVEVHLASEFGYNTPLLSKKPFFIFLSQSGETADSRQVLVKINRLGYPSLTITNVAGSTLSREASFTLLLHAGPEIAVASTK…
442	AMQ98769.1	BU192_05700	ATPase (plasmid)	0.0122	32259	4.76	Cytoplasmic	284	MMKSNFLGYVIAINMFKGGVGKSTLTQLMADILSARGFKVLVIDVDPQGTVTKKFQRQYDLKVVGKMTLFEAVINMSFLDCISPVKENLDIVLGSEQMSRFTKVLRDMWRSTGFTDEGEEVFWNLFNYMIGNDNLRDQYDFILFDTIPTVSEFTDNVYVASDFLVIPTQTEQDSIDNLHSTVTNYQTAVKEVNGDLEILGIVPYLVDTKLKTGLELLSELQEEYGDLVYSHIVSERGVIKRWGREGLNKSIPHSKTAYSMYVDIVEETLVRLEKATGENILERV
443	AMQ96924.1	uspA	universal stress protein UspA	0.0116	16207	4.92	Cytoplasmic	146	MVDTYRNILVAIDGSEKAEKAFLEAITIAKRNQATLHILYVNEVTGNYFGDFAFVTTSLQEELDEVAENQMKEHRNLAIEKGLTDIETYVLYGYPKTLIANFHESKEPIDLIVMGATGLNAVERALVGSTTSYVVNHASCNVMVVK
447	AMQ96947.1	xerD	recombinase XerD	0.0111	34319	9.03	Cytoplasmic	295	MKEQINDYLHYLNIERGLSANTRQSYERDLEQYLHFLQEQKIASWQDVDRFLVIRFLEKLHEEKKATATVTRMISSLRRFHQFLRQERITDHDPMQHIDTPKKAQKLPSTLTLTEVEKLIEAPDTTKTLGIRDRAILEVMYATGMRVSELIGLKLGDLHLSLGLVQTVGKGDKERIIPLGDYAIQWLERYLDEARPLLVKDASEMHVFVNNHGKGLSRQGIWKNLKQLVREAGIYKEVTPHTLRHSFATHLLENGADLRTVQELLGHADISTTQIYTHITKKRMTDVYKQHFPRA
451	AMQ96839.1	AS238_03650	MarR family transcriptional regulator	0.0111	16866	7.93	Cytoplasmic	146	MEPDLKTVNDYLVSVFNDILTIEESELKKSQFKDLSITEMHTIEAIGMYKKKTTSEVAKELSITVGTLTTAINKLVKKGYVERIRSEDDRRVVKLGLTKKGKLLFRVHQHFHREMVKNILDGMATEEQHALLDALKNLHDFLQDYK
452	AMQ97936.1	ansA	L-asparaginase	0.0111	34676	5.42	Cytoplasmic	322	MKKILVLHTGGTIAMKENMLTGGVSPDVANPLLDAEITIPKHVELLVEDIFNLPSPHIMPSHMLVLKERILSAYASGISGVVITHGTDTLEETAFFLDTTIGNKLPIVLTGAMRSSNELGSDGLYNFESAIRVASCEEALDKGVLVVMNDEIHSARYVTKTHTTNVATFRTPTLGPIGLVTKNRILFLQELLETKRLDISAVDGTIPIVKAYAGMQGDLLEAIAHTKVDGLVIEALGAGNLPPQALAALEKLLVQKIPVVLVSRCFNGIAEPVYDYEGGGKELEKMGIIFCNSINSQKARLKLLIAVNYGLSGEELISFIQN
455	AMQ97772.1	smpB	SsrA-binding protein	0.0105	17851	10.2	Cytoplasmic	154	MPKGEGKLIAQNKKARHDYSIIDTMEAGMVLQGTEIKSIRNSRINLKDGFIRVRNGEAFLHNVHISPYEQGNIFNHDPLRTRKLLLHKKQIIRLENELKNTGITVVPLKVYIRNGYAKVLIGLAKGKKSYDKREDLKRKDIDRQIDRTLKNFSR
457	AMQ97054.1	guaC	guanosine monophosphate reductase	0.0105	35948	7.66	Cytoplasmic	325	MKVFDYEDIQLIPNKCIVNSRSECDTTVTLGKHTFKMPVVPANMQTIIDETIAEFLAENGYFYIMHRFDEAARIPFIKKMKKRGLITSISVGVKKEEYSFIEKLAEESLNPDYITIDIAHGHANSVIDMIQHIKKYLPETFVIAGNVGTPEAVRELENAGADATKVGIGPGKVCITKIKTGFGTGGWQLAALRWCAKAARKPIIADGGIRTHGDIAKSVRFGATMVMIGSLFAGHEESPGETKVENGIVYKEYFGSASEFQKGEKRNVEGKKIWIQHKGSLKDTLVEMQQDLQSSISYAGGRDLEAIRKVDYVIVKNSIFNGDTI
458	AMQ98406.1	dps	DNA starvation/stationary phase protection protein	0.0105	17882	4.59	Cytoplasmic	155	MKFQQTKEVLNQLVADLSQMSVVVHQTHWYMRGPGFLTLHPMMDEFMDDLNAQLDEVSERLITLDGSPYSTLREFADNTKIPDEIGRWDRTIPERLETLVAGYRYLADLYQKGIEVSGEEGDDPTQDIFIEFKTATEKRIWMIQAHLGKAPEIDA
460	AMQ97485.1	prgP	chromosome partitioning protein ParA	0.0105	36300	5.33	Cytoplasmic	317	MENLRTAFKTSDKLGKVVMLTGRKGGIGKTTDNDLLAIVSSQLFEKDVLLIDYDQQRNTTSNIGSTYQITSFDRSMSAAIKKGDWVSGITQVSPHLYIMAGSPGSEELNEYLSEKYPDRRKRSLAFIKPLEELRKNFDYIFIDCPPSTDNVVRAFLTAADYIIAMQELKRYAMEGTEDFINKVLVPIVTNFEESHLQIIGILPVLFSVRRSSQHANYQKTIDKYGESNIFKSIVKGSDRLEMYGENGIQLNDYVDRRWWAIFADIFTELEERIEYYEQHGDIEGFDYTPKYADSMANHILPLGKEIKLNGIITNEQR
17	AMQ96134.1	tmpC	hypothetical protein AX771_00205	1.2946	37775	4.58	Extracellular	360	MKKAKLFGLGAVALAAGLFLGACGNNGSTDSSGGKSSSDTTTAALITDTGGVDDRSFNQSAWEGLEKWGKDQGLSRGNDGFQYFQSSNESDYIPNIDQALNAGFKTIFGIGYKLKPAIQEQATNNTGTNFVIIDDVIDGLDNVVSATFKDNEASYLAGVAAAYTTETNVVGFIGGVKGEVIDRFDAGFKAGVDAGAKELGKEIKVLNQYAGDFSAPDKGRSIAQGMYAQNADIIFHASGGTGNGVFQEAKSLNESGDKKVWVIGVDRDQSDEGEYTLNGEKKNFTLTSTLKAVGTVVEDLAQKSADGKFPGGEHTVYGLKEDGVGLTEGQLSDEAKKAVDEAKEKIISGDVKVPETPEEN
71	AMQ98820.1	vanX	peptidase M15 (plasmid)	0.1868	23351	5.41	Extracellular	202	MEIGFTFLDEIVHGVRWDAKYATWDNFTGKPVDGYEVNRIVGTYELAESLLKAKELAATQGYGLLLWDGYRPNRAVNCFMQWAAQPENNLTKESYYPNIDRTEMISKGYVASKSSHSRGSAIDLTLYRLDTGELVPMGSRFDFMDERSHHAANGISCNEAQNRRRLRSIMENSGFEAYSLEWWHYVLRDEPYPNSYFDFPVK
90	AMQ97230.1	AS238_03490	lysis protein	0.1536	23480	4.4	Extracellular	215	MKKTVIYTSLFAALFLAACQSNTNQGTSGNTSSSSEQRSSQVSDSSTKASTSSSSQTKSSSEASTQSDIKVSAARAIELFQDKYPDTAITSLELDSDWGSYFYKIEGVDDQKEYEARIDAQNEKMETENPETLDRDEQNGQKKKEDGLDVDKLITIEEAAKIAVDKVGSGTATDWDLDKDLGTTYWEVKVKDGNQSTSVKINSQTGEVLSTEQDD
104	AMQ96439.1	AS238_04650	N-acetylmuramoyl-L-alanine amidase	0.1304	76828	4.87	Extracellular	714	MKNKKTIRLLAATWLIAPSVLSTNTVFAVDNQIADQTVTTDTTTSSSATSETTDSFTEDPTGTTNSTTGSTEPTEIDPADPSENEKPAETYSLTIAPSLIGKIQLTASTADSPEQQPLDITESGTVEGLLAETKVTYTITPAEGEQIASVAVNGAKEVNYDAKTFTVGTNNLSITAEFKAGPDTSTEKPTDPSEEVPSTPDPETPNKPDVGNNNNNNGSNNSNNNNNNSNSGNSSNQTNPSGSNNNGNTQREPNHPNNGSSNGGTNNASSRPNTANQSGIENPSSASSDFVVKSPIDAVLPTNTTNVQQAIVREAFKHLGKPYVWGAKGPNTFDCSGLTYYVYMKATGHYIGGWTGEQQYAGTQIPVSQAQPGDLVFWGPSSGVTHHVGIYIGNGQFIH…
115	AMQ98283.1	sagA	hypothetical protein AX771_13110	0.1199	55461	4.41	Extracellular	524	MKKSLISAVMVCSMTLTAVASPIAAAADDFDSQIQQQDQKIADLKNQQADAQSQIDALESQVSEINTQAQDLLAKQDTLRQESAQLVKDIADLQERIEKREDTIQKQAREAQVSNTSSNYIDAVLNADSLADAIGRVQAMTTMVKANNDLMEQQKQDKKAVEDKKAENDAKLKELAENQAALESQKGDLLSKQADLNVLKTSLAAEQATAEDKKADLNRQKAEAEAEQARIREQQRLAEQARQQAAQEKAEKEAREQAEAEAQATQASSTAQSSATEESSATQSSMTEESSSATQSSATEESTTPESSTEESTAPESSATEESTTAPESSATEESTTVPESSATEESTTVPESSTTEESTTPAPTTPSTDQSVDTGNGTGSSTPAPTPTPTPEQPKPVT…
126	AMQ96659.1	AS238_06470	virion core protein	0.1033	45390	5.11	Extracellular	415	MGLIKAATSMVGGGLADQWLEVIEPDNMSDTTVMTKGVKVRKDDKRGSNRKGTEDVLTDGTVVHVYPNMMMLLVDGGKIIDYTAEEGYYTIKNDAAPSMFNGTLKEAIAETFDRFKFGGVTPQKQQVFYINLQEIKGIKFGTSAPLNYFDNFYNAELFLRAHGTYSIHVVDPILFYTNAIPKNKTQVEINDINEQYLAEFLTALQSAINQMSADGQRISYVPSKSLELSKYMDTALDDSWRELRGMEIVSVAVASISYTDDSVKLINMRNEGAMLGDPSVREGYVQGSIARGMEAAGKNEAGAMTGFMGVGMGMNANGSYLSQAAQNNQEQIKQQAEKQNQQTAQGNADTWTCPVCGTENSGKFCSNCGAAKPVENVQPKLQMRCSECNEIVDLSNGIP…
166	AMQ98074.1	CUS93_13145	phage tail protein	0.0718	18637	4.34	Extracellular	170	MEALKGIDVILLYRLLKKETQEAAWKMAFQTEHENGLSRDSDSTVTKDGNVQSLSPVEYDFSATSIVAKGDSHVDEMKQALLNGDIIEIWEINKAEQGTDDNANKYKATYYQAYVSEFTPSAAAEDNVELNLSFAVNGVGQDGYATLTEDQADVVQYAFKDTVKATSTGA
180	AMQ98633.1	AWT83_15985	hypothetical protein AX771_14680 (plasmid)	0.0652	24119	5.16	Extracellular	214	MENKTLKIVLTAAISVSLIGNIALFWQLKEEQATNTYKIEEVAKNASEKLKKNSSSAQAKIDKLNQTINEKNQEIDQLKQQDGTKAKEEVNEAQSKTAEEFGKLAIDKSLSRNELTEKLKDVATQEVIDKLSPADDDHQHDDYGSYSFTLGDVQTYAQTSSVKEEQNFVVFVDYTIGNPQFKDVKPQKIKGGLTVTEKQVDGQWKVTDFSYFTR
181	AMQ97533.1	CUS02_09570	hypothetical protein AX771_08480	0.0652	7460	10.9	Extracellular	66	MKIGMRKPSIKKSISARTTGKAKRAVKKAVIPGYGKKGTGWIKNPKKAAYNKVYKKTTFSFWDLFK
182	AMQ96576.1	AS238_10150	hypothetical protein AX771_02780	0.0652	15723	4.83	Extracellular	141	MKKLIVLFILSAGLLTLTGCDLFGGSDQSSDETTDSSVLKAEKADTTNSVYTLKVRKDMDLSAGQLTFTDKKMEWTRTYQTQGTDSSESSEEKTVLTDIKITTKDDEYIISGKENKKETTVIFTKIGNYRLKDEDGNIYSL
205	AMQ97757.1	A5810_002182	hypothetical protein AX771_09830	0.0564	8292	10.26	Extracellular	70	MKWKEKVDEAAEKLYDLVKSEKYNIEVNIPKKGGKAVQVKSKRPTNHTKKWMAKTANNNKRSISRHFHRF
211	AMQ98819.1	vanZ	protein vanZ (plasmid)	0.053	18415	9.87	Extracellular	161	MGKILSRGLLALYLVTLIWLVLFKLQYNILSVFNYHQRSLNLTPFTATGNFREMIDNVIIFIPFGLLLNVNFKEIGFLPKFAFVLVLSLTFEIIQFIFAIGATDITDVITNTVGGFLGLKLYGLSNKHMNQKKLDRVIIFVGILLLVLLLVYRTHLRINYV
214	AMQ97030.1	lytG	N-acetylmuramoyl-L-alanine amidase	0.0519	23481	5.95	Extracellular	205	MAKKKWKKQKRKNIRWPAVVAGVAVILLAFVFSLKNLSSPFTDNQQENEAQSHQQFIERLVPHAQELQDGYGVLPSIILGQAILESNWGKSTLASKYNNLFGIKAYGDQKKVSLETKEFVNEEWITIQGDFKVYDSWEQSMDDHTQLFVQGVDWNPALYEKVITATNYQEAAQALQDAGYATDPGYAQKIIQVIETYQLNQYDRR
230	AMQ97029.1	AS238_02400	peptidase M15	0.047	30741	5.1	Extracellular	274	MNKFLGFGAVVIMIAAMGYVIFSDDDSHVQAGNQAVERTSTKTTASKEKNSQTTSSKVKDKETKDRTSKQLPDVKTDDWKLVLVGPDHKLEKEIDESTQLASLSNGYLIDKRIAPEYEAFAKAAEAAGFPLVMVSAYRSVSSQQQVFEQNVQDVMSRQGVSEEEATKITKETITEPGYSEHHTGLAVDVVDQNWYNSYPSTVLDASYGDQPGAKWIADNAAQYGFIVRYPKGHEDITKITYEPWHLRYVGKENAEYITKHQLTLEEYLNELNEK
338	AMQ97073.1	AS238_02140	esterase	0.0221	8643	9.61	Extracellular	72	MIVQLKKDYSSDHAFFITPPAVDETKQKYRNNKLIKEYISVLTEVAKRHDCEVSIFIRNFLNKWIRRIFIMG
344	AMQ97695.1	HMPREF1359_01850	glycosyl transferase	0.021	39265	8.54	Extracellular	333	MKNPMFSIIVPIYCVEKYLKDCLDSIRDQTFKNFEAILVDDGSPDECPEICDYYSQIDGRLKVIHKKNGGIIDARKIGVTSAMGEYIVFLDGDDWLANTYLEKYAEVITKYNPDIICSGYFASRSNKIRKRELSCSFGYYDKNKIINLIYPKLIEDEHGEYFSPQLWAKAFRTTLYKEQQQVSGQVSVGEDHACTKPCIYHANSIYMMEKCLYYYRINENSITKKPQPYYWEGPKAIGEHFEKQIDMNKYDFQDQVYRNVTHNLFNVAVSQFNKQDKYLNIKKDIIQNLSDEYYTRAICKCKYKDNWKGISAKFALKNKWVFLIYIYNKLIKR
349	AMQ97696.1	HMPREF1359_01852	glycosyl transferase	0.0204	40890	9.28	Extracellular	355	MANNDDGLYRFRGMLIKNLVDQGNEVIVSLPKGKNIPKLIELGCQIIETPIDRRGINPKTDFKLFFNYCNILKKIKPDMVIAYTIKPNIYGGLACRLRKVSYALNITGLGTAFQKKGVLKSLIVFLYRLAAKKSKVIFFENFENMKTFQTLQIAKQSKYKLLNGAGVDVEHFSYLEYPKDEQVHFLFIGRIMKEKGVDELFEAMKNLYSEEKNCVLDVLGYFEEDYGIKIEKYEKEGWLKYHGYQSDIRPFVERAHCFVLPSWHEGMANTNLESAASGRPIITSDIPGCKEAVIESKSGYLCERKNSCSLYNSMNKFLKLSYEQRINMGKMGRNYMIKKFNKKKVVDETIKSLFS
357	AMQ96786.1	wbbL	glycosyl transferase family 2	0.0193	31329	8.69	Extracellular	266	MNNKLNQPILISIVTANSDKIFRTLDNFISTVKDETAVKIRIFDNNSLPEYKKRLTEYRKYPYIDIYFHDENSGFGYGHNHNLIASDSRYGIICNPDILVDEETVTALVLLLKEHPECAMLAPKILNEDGTTQHLIREQLAVFDYVLRFVPFKWVKKKFDKRLAVFECRGLPTDANSYVRMISGSFMVADIDKFKEIKGFDERFFMYFEDNDLCLSFEKAGYKLLYTPFYAVIHFYGKGAHRNAKLFRVFLTSMMKFFNKWGWRFF
370	AMQ96797.1	HMPREF1359_03105	glycosyl transferase family 2	0.0177	81276	5.5	Extracellular	712	MQKKEIAVFIDQITRERATGDLLIVGWAIDEVTKEIPTIKVEKENVIAEATHVVRLDINHLYNLDVKTQSGFKVRLSGKMRGKAILDFQTARHQNGIAVKLNGKYPYDDGIESSWERKKRLLKKGINYARTHGVKKAIRRVKLELKPGSIDYAEWISRHEKPDLKEQRKEVQGFAYRPLISILMPVYNVEIKWLEKCIDSVLDQTYDHWELCISDDASTDPAIRKCLESYQAKDDRIKVVFRQENGHISLATNSALEMAEGEFIALLDNDDELPPFALYEVAKVLNVHPELDLIYSDEDKIDADGNRFDPHFKADWSPDTLMGNNYISHLGVYRTSIVKELGGFRKGYEGSQDYDLVLRVTEQIPAEHIYHIDRVLYHWRTIPGSTASNGEAKSYIYDS…
374	AMQ98486.1	AS238_08575	hypothetical protein AX771_04915	0.0171	11105	9.5	Extracellular	91	MKLEDKKVILKKIKRLPDQIDGYTICSFKKDRSIKAYTQNTEKGIIYFLHEEGYDTQTFMFTEKKEFHKQMKKLIEKEFPRSHKLYVNQQF
402	AMQ97515.1	CUS02_09675	hypothetical protein AX771_08380	0.0144	13028	6.27	Extracellular	115	MNDFHEAVLTFDVPAGMGQVYKKAIEDDNSRHWIKNEIKDGDGNIVISNIKPVWNGNYCNVDITDGVRGHSKLTITLLSRTLPNLQEQVDWYKRMGAKVISTNYKGENQNGNEKN
13	AMQ98824.1	vanS	histidine kinase (plasmid)	1.4477	41396	5.21	Membrane	364	MYIVAIVVVAIVFVLYIRSMIRGKLGDWILSILENKYDLNHLDAMKLYQYSIRNNIDIFIYVAIVISILILCRVMLSKFAKYFDEINTGIDVLIQNEDKQIELSAEMDVMEQKLNTLKRTLEKREQDAKLAEQRKNDVVMYLAHDIKTPLTSIIGYLSLLDEAPDMPVDQKAKYVHITLDKAYRLEQLIDEFFEITRYNLQTITLTKTHIDLYYMLVQMTDEFYPQLSAHGKQAVIHAPEDLTVSGDPDKLARVFNNILKNAAAYSEDNSIIDITAGLSGDVVSIEFKNTGSIPKDKLAAIFEKFYRLDNARSSDTGGAGLGLAIAKEIIVQHGGQIYAESNDNYTTFRVELPAMPDLVDKRRS
14	AMQ98211.1	prsA	peptidylprolyl isomerase	1.4001	36850	4.82	Membrane	336	MKKKSIILAATSALAVLTLAACSGDTNKDIATMKGGTITVSDFYDEAKLESSNQSLVQRMIIYKVFNNKYGDKVTDKQVDAEYDKQAKSLGDTFESQLEAAGYTKDTYKEYIRNNLAFEAGLKAHVDITDDDLKTAWKSFHPEVEAQIIKLSSEDEAKDVKKSADDGDDFSKLAKDKSTDTETKEDGGKVKFDSTTTTIPAEVKEAAFKLKDGEISDVITTTNPTSYATEYYVVKMVKNQNKGNDMDKYKDQLKDIATETKLSDNAFTTKVIGEELKDANVKIKDDAFENVLSAFTTTSSSTKDSSETTASTKSSDTKSTDSTKESSTEETTDSSK
22	AMQ97250.1	HMPREF1359_02858	penicillin-binding protein	0.8426	73705	4.88	Membrane	679	MKRSDKHGKNRTGAYIAGAVILIAAAGGGYFYYQHYQETQAVEAGEKTVEQFVQALNKGDYNKAAEMTSKKAANKSALSEKEILDKYQNIYGAADVKGLQISNLKVDKKDDSTYSFSYKAKMNTSLGELKDLSYKGTLDRNDGQTTINWQPNLVFPEMEGNDKVSLTTQEAARGNIIDRNGEPLATTGKLKQLGVVPSKLGDGGEKTANIKAIASSFDLTEDAINQAISQSWVQPDYFVPLKIIDGATPELPAGATIQEVDGRYYPLGEAAAQLIGYVGDITAEDIDKNPELSSNGKIGRSGLEMAFDKDLRGTTGGKLSITDADGVEKKVLIEHEVQNGKDIKLTIDAKAQKTAFDSLGGKAGSTVATTPKTGDLLALASSPSYDPNKMTNGISQEDY…
24	AMQ98016.1	lepB	S26 family signal peptidase	0.799	21651	5.36	Membrane	189	MKEFLKNWGILILVLAAILLARVYVFTPVTVNGHSMDPTLSDGQRLISSKISNYERMDIITTKEPGDEERMIVKRIIGMPGDTVKMENDQLTINGKKYDEPYLDEFKKEFSEDKLQGEYAYSSGFQAQAESSSTFTSDFEYTVPKGKYLVLGDNRLISKDSRMFGLVDKDMIQGKVVFRYWPLSEIKIM
36	AMQ96688.1	manX	PTS mannose transporter subunit EIIAB	0.4553	35640	5.14	Membrane	329	MVGIILASHGQFAEGILQSGSMIFGEQENVKAVILKPSEGPDDLRAKLEEAVASFDNQDEVLFLVDLWGGTPFNQSNTLFEEHKDKWAIVSGLNLPMLIEAYASRFSMESAHEIAAHIIETAKDGVKVKPEELEPAEAPKAAVEDAQPKGALPEGTVVGDGKIKYVLARVDSRLLHGQVATAWTKAVQPNRIIVVSDAVSKDDLRKRLIEQAAPPGVKANVIPISKMIEVAKDPRFGNTKALLLFENPEDVLTAVEGGVDIKELNVGSMAHSVGKVVVSKVLSMGQEDVEAFEKLEQKGVKFDVRKVPNDSRDNMDDILKKAKAELAKA
37	AMQ98400.1	AS238_11210	manganese ABC transporter substrate-binding protein	0.4553	35626	5.29	Membrane	316	MMRKWKAVLGSLGILIALFIFGACSTNSKDKDTVASNEKLKVVVTNSILADITENIAKDKIDLHSIVPIGKDPHEYEPLPEDVQKTSKADLIFYNGVNLETGGNAWFTKLVKNANKEENKDYFAASDGIDVIYLEGQSEKGKEDPHAWLNLENGIIYAKNIEKQLAEKDPDNKKFYKENLDKYIEKLDSLDKEAKSKFASIPNDKKMIVTSEGCFKYFSKAYNVPSAYIWEINTEEEGTPDQIKHLVEKLRTTKVPSLFVESSVDDRPMKTVSKDTNIPIYSTIFTDSIAEKGQDGDSYYAMMKWNLDKIAEGLSK
43	AMQ98527.1	HMPREF1359_02443	hypothetical protein AX771_10795	0.3873	24108	9.19	Membrane	214	MVQSLSTEQIKTKFSSNSSNLSAKDIQKNRLEYFKKNSDLIIGDIIFNDKDRAFLIKKSILMNRAQIIVKYDEIQTFTPIFLGGQIKKHHGITRALVGGALAGPIGALIGAGTGGKEWESINRLGIEIYLKDNRIIKYDLISNETKINSLIGKNSFDQYNHLSAKLESILSNQTSTSVEITSQIDEIRKYKELLDEGIISQKEFNEKKKELLNL
44	AMQ97671.1	dacA	D-alanyl-D-alanine carboxypeptidase	0.3835	47679	4.83	Membrane	435	MSIKKTRLVLLLASLILCLASFLPAVAVQAEDTFKVNAKAAFAVDAQSGKILYDQDGEKTMGIASITKIIGLYIVLDQVKEGKLSWDDKVSISDYAENLSVTPDLSNVPLHKENTYTVKELFDSAIIQSANASMVALAEKISGSEAKFTERMKEQLKDWGIKDATIVNASGLNNSYLGENRPEGTGENDENQMSAQDVAIVARHLILDFPEILDVSSTTTQMFGENTQSPVEMVNWNWMLPGFVNYKEGVDGLKTGTTELAGACFVGTITKNDQRIITVVLNADGHAENPSARFNETARLMDYCYDNWSEKELGKANASIPSLKTIDVKDGKESTVPVVLKSPVKVWVRNDMDTGKLTITPTLDKKQVTDNEIQAPMDKGTKIGTATITLAEDKLGYLE…
47	AMQ97452.1	AS238_11750	sulfurtransferase	0.3658	15062	9.78	Membrane	131	MVLWVINIILLLIVLAIILWEVYLRVMAKRSATTLTEEEFREGMRKAQVIDVREKDVFDAGHILGARNIPYTVLKDSLGSIRKDQPVYIYDQKKSLSIRTANKLRKAGYQEIYLLKGGYDGWSGKIKSKKV
49	AMQ96313.1	AS238_02045	serine protease	0.3487	44845	4.81	Membrane	429	MDRKNVTPKMKKSKNNSLWRKLGLGLVGGIVGGLLTAGIFYAAMGTGNNSSTATSGNQNSAGETVVENVKVNVDSDITKAVDKVQDAVVSVINLQSQNQSSGFGGLFGQQEESSSSDDSNLEAYSEGSGVIYKKDGNTAYVVTNNHVVDGQQGLEVLMKDGTKVKAELVGTDAYSDLAVLKINSDKVETVASFGDSSALKVGEPAIAIGSPLGSEYANSVTSGIISSLNRQVTSTNESNETVNINAIQTDAAINPGNSGGPLVNIEGQVIGINSSKIASTSESTSNVSVEGMGFAIPSNDVVNIINQLEKDGKVTRPALGITMVDLSAVSTQQQEQILKIPSSVTNGVIVTNVQTATPAEKAGLKQYDVITKIDDKEVSSGVELQSALYKKKVGDSVKI…
55	AMQ96516.1	xpaC	5-bromo-4-chloroindolyl phosphate hydrolysis protein	0.2912	25633	6.01	Membrane	220	MIKRNWPWLLALVLLFLFVRNNSFSFVLGLLLIGVVLVLWGLFGSRRKKGKQEEIPALTDELETHYEKSGMTANEISFFRQTMNQTKNEINQLQMNMQQTAKLKAIDLRHDPVKAAKALFKELVKEPNRLHEASQFLYTHLPNLVDLTNKYNEINDHEIKNKQTYEKLEESAQIIDQLSALIAQDYQKFVAEDLDDIDVEISVAKQSLKRDNKYEPEQKD
56	AMQ97722.1	yneF	hypothetical protein AX771_09645	0.2591	8402	10.07	Membrane	74	MLSTGIVVLIAIIALLIGAVGGFFLARKYMKDYLEKNPPVNEDMLRSMMMSMGQKPSEKKIRQMMQQMKNQGKK
63	AMQ97460.1	feuA	ferrichrome ABC transporter substrate-binding protein	0.2254	35070	4.86	Membrane	318	MKLKTKVFTLSSILLLAGVLSACSPSSDKETATTANSTTSSNSTHTVTDTLGHKVEIPNAPKRIIGSYLEDYLIALGEKPIAQWTVGSGSIQDYLQDDLKDVPTISYDLPYEKVLSFEPDLLLISSSATVEGGKYEQYSKIAPTYVVKNGTDVTWEEQLKDVGKALAKEKEAEKIISDYQKSIKKTREELADKIENKTAAVLWVTNNSAFMVSKNRSSGRIVYDDLEFGVPDLVEEVSKKATSDWSAVSSEKLAELDADYIILVNSDKDAAMFNEPSWKNLKAVTDNHVLQFGPESSWLYNGPIASQEMVNDIKEKLN
65	AMQ97111.1	fabI	enoyl-ACP reductase	0.216	25668	5.19	Membrane	240	MGVANKKSIAWGCAEAMLKQGAEIIYTYQNERMKKSLVKLVGEEAFTVECDVSSDESIEKAMNAIGEYAGEIHGLVHAVAYANKEELSGNVSDISRDGYQLAQDISSYSLIAVSKYAQPFLAPNSGIVSMTYLGSERAIPNYNMMGIAKASLEAAIRYLAAEFSPKGIRVNGISAGAIKTLAVTGVKDYQKLIQLSESRTPDQQGVTIEEVGNACAFLISPLSSGIIGDIIYVDKGVHLS
70	AMQ97113.1	AS238_08425	peptidylprolyl isomerase	0.1901	27430	4.8	Membrane	253	MKKNKVILSISLAAALLFAAGCSANNTTSSSSSTESSKSTSTAESTTASSVDLNALELPQLTKDVAENEDLVEMVTNKGTIKIKLFPEHAPKAVENFMTHAKDGYYNGLTFHRVIKDFMIQGGDPKGDGTGGESIWGEGFETEINNHLYNIRGALSMARSQDPNSNGSQFFIVQNTDDMHDGLLKDDYPQAIIDAYKNGGYPSLDGHYTVFGQVIEGMDVVDAIANIETDSSDKPKEEVKIDKINILQEAKQK
73	AMQ96690.1	manZ	PTS mannose family transporter subunit IID	0.1757	33185	9.26	Membrane	304	MAEEKIKLSKKDRLAVAWRSTFIQGSWNYERMQNGGWAFSMIPAIKKLYKTKEERSAALKRHLEFFNTHPYIASPILGVTLALEEERANGAPVDDVAIQGVKVGMMGPLAGVGDPVFWFTVRPMLGALGASLAMGGNILGPIIFFLGWNIIRWAFMWYTQEFGYKAGSKITDDLSGGLLQDVTKGASILGMFVLAALVQRWVSIKFLPVVSTVKLDKGAYIEWDKLPSGGEGIKSAFEQVNNGLALSPEKVTTLQDNLDQLIPGLAALGLTLLCMWLLKKKVSPIVIILGLFVVGVVGHVIGLL
74	AMQ97350.1	AS238_11150	ABC transporter substrate-binding protein	0.1757	46809	4.39	Membrane	428	MNIRKLIAGVVCLAAASGFLTGCGSASSTADKEEKVTVWAWDETFNIKAVNEAKKVYENEETEIEVVTMSQDDIVQKLNTALASGNTEGLPNIVLIEDYRIQGYLTSYPDAFANLSAIVKEDHFAPYKFAVNKVGDKIYGVPFDSGVTANFYRTDLMAEAGYTEEDMENLKWDEYIQVARDVKEKTGKKIAEVNPSDLGRVRMIMQQAGEWYTSEDGETVTIQDNASLKYGLELFATLLKEDLVEQTSDWNAGVTAIQSGAVASSPTGAWYSSTIQGAENQSGKWKIAPIPALPENLQKAQASNLGGAGWYVIKGVAGEDSAKDFLEATFASNEELMGTLAKEIGLVSTMLSANEQEAYQEASEFYSGQKIFDDFSTWTSEIPEVNYGHETYAIEAVVA…
75	AMQ98284.1	mreC	rod shape-determining protein MreC	0.1718	31308	5.3	Membrane	284	MKKFNPNKNIIITLVIVIIVVTILSVTAAQRANEGKPNFFQSIVNDSVAMVDKTISAPVRWVRNGVASVHNLFSTYAENERLKEKIDSYDDVSQQNKNYEREIEALKKELELNQTLTSYEKVTANVITRSPDSWQDMLIVDKGSKDGIEANMAVMSQKGLIGRVIEVNTASSKIELLSSSNESSNHFPVRVSSANGEAFGLLKNYDEKLHALVVTQLTGDTDIKEGDVVQTSGLGGNSPANLPIGTVIKTKPDSYGLDREVYVKPYAEMYDVSVVTIVQRLAED
76	AMQ97138.1	ponA	penicillin-binding protein	0.1713	86528	5.03	Membrane	793	MANEQTRSSRRQKQPTPKKSVKKNSGKGSGKSSGTHKKGLFIKILLGILSFFCILFLAGVGLFWYYAKDAPELTDKKLDATVSSKLYTQDGELFEDLGAEKREKISANELPKTLEDAIVSVEDRRFYKHIGVDPIRIIGSALSNFTSGGLQGGSTLTQQLIKLSFFSTSAEDQTLKRKAQEAWMAVRLEQKKSKQEILTYYVNKVYMSNGLYGMETASEMYFGKKLSELSLPQTALLAGMPQAPSAYDPYVYPDQAKKRRDTVLYTMLQNEKISQTEYDQAVNVPVTDGLQELTQSDDNTKIVDNYVKEVINEVQEKTDKNVYTDGLEIYTNLDLDAQKKLYDIVNTDQYVSYPDDEMQVASTLIDTNTGKVKAQIGGRHIAEDVTLGNNLAVNTSRDF…
79	AMQ96977.1	AS238_14650	hypothetical protein AX771_05200	0.1663	27241	5.3	Membrane	237	MKTRSDVSSNKTKKTNYWKFAFLILLGVVLGSTVFLGSRIFANREPELPEIPALTERQGDPVLTINSNKEKVNQIISFFLSEYQKDSDIEYKFYLENEALLNGTFEVLGFPIDFYLYFDPYVMENGNVQLKARSLSIGTLSLPIKDVMNMIKRNYKLPDWIEVNTDDLTIMLRLDQFRMQNGMYIKADKIDLVNDDIRFSLYLPKDTSDASNNSNTNKTSTSSTESKTKENKKSSDE
81	AMQ97700.1	HMPREF1359_01859	tyrosine protein kinase	0.1658	24831	9.42	Membrane	232	MARTQKQKATQTHAVSLITLTNPSSPIAEQYRTIRTNIQFASAAGQQIKTIVVTSSGPGEGKSTTAANIAVVFAKSGQRVLLVDADLRKPVVYKTFQLNNASGLSTALSSSGSVADVIQRTPVENLSILPSGPKPPNPSELLSSPRMDQVLAEARQLFDVVIFDMPPVVAVTDAQIMSSKTDGTLLVVRENTSRKESLTKAKELLEMVQARVLGVVYNGAEHSKDAGYYYGN
83	AMQ97103.1	peb1A	glutamine ABC transporter substrate-binding protein	0.1641	29802	5.13	Membrane	271	MRRLKKIRLIFLLGIAFLALAGCKGNGLANEDILERSKSTNEIIWGVKYDTRLFGMMDIESRTVQGFDVDIAKAITKKILGDNGKTEFVEVTSKTRIPLLKNGNIDAIIATMTITDERKKQVDFSDVYFDAGQALLVKKGSQIKSVDDLNASTTVLAVKGSTSAANIRQHAPDAKILELENYAEAFTALQSGQGDAMTTDNAILLGIADENPEYELVGGTFTNEPYGIAINKGQENFLKAVNQALEEMHADGTYDKIYQKWFPNETEGKVE
85	AMQ98740.1	BU192_01090	hypothetical protein AX771_15245 (plasmid)	0.1613	32459	4.79	Membrane	288	MKKLRVIATIPMIFSFALLLSACGKEEAGAKSNEAHNISFIDSAEQKDSRCWLVVETSSKNKTPIDKNEYVKAVIQTKDGKAKVFKTDMEQLTLEKVSKMSDEEIIEQALNADKQKFNDKKKSDIDSYNATLDSVKTELENEEKQEFQNDQKIADFQDSIPKIQADIEEIDGVQYSEPEWKMVSATIKMDNENKSPSMETVKLSYKYLDSPIWNLNSFGEVSSEGELSYESTSMDLKLSIPVATTKVLDNFYSGYSNDELDQLLLTKVASKDNKVQLDSKGKNVSIVE
87	AMQ98441.1	HMPREF0351_12691	hypothetical protein AX771_14085	0.1586	25583	9.6	Membrane	231	MEPEQLRAIVKENNSLETKLTKRNQQYIFDLKKSLEAANLSEEEKVKALHDILPTLVAEQKGGRTARQLFGTVSERTEAIINKPAEVKNSSTPLLMWLDNTLLLLGLLSIMIAITGLFSRGTTPAYGFSTLVLGSAIGGWVFYMMYKYIYQYEYPGADRSKKPGMGKTLLILGGTTLLWVVLFSATTLLTPVINPVLDPVVVIIIGATALAIRYYLKKKYGIIGSLSVPRR
88	AMQ98511.1	AWT83_10685	phage tail protein	0.1564	20890	5.16	Membrane	190	MMATPDTVGEAPTYSEIVRLPIATKLGIKGNGTALEKWASSKMFRRVSRETKHELALDHVGIPIAVMDELKGLIAESGVTFGKNTAREFPYFAFGFIGNIENGGKKAVWYPKTQLSNVIDEEYATADDETKIDDVTANFISSGLKYNNVMYSSFDSNRDGASLELFNKFIAQPVYDEEQWKTLAKVGGAG
89	AMQ96482.1	psaA	manganese ABC transporter substrate-binding protein	0.1564	35391	4.75	Membrane	316	MKTKKSLFLILAVSFLVLAGCGKQASDQADEGSKEKLSVVATNSILADMAKEVGTDQIDIHSIVPVGTDPHEYEVLPEDIKKASDADVILYNGLNLETGNSWFDNLMETAKKEEGKDYFAVSKNVEPLYLTSGEEHTKADPHAWLDLSNGIKYVEEIARIFSEKDAENATLYKKNAEAYVEKLKELDTQAKESFASIEENKKLLVTSEGAFKYFSRAYDLPAAYIWEINTESQGTPDQMKAIIDQIRAKEVPVLFVETSVDSRSMERVAKETGLKIYDKLFTDSIAKEGEQGDSYYQMMKWNIETIHEGLSQTKES
93	AMQ96568.1	B4W81_01250	sortase	0.1492	26375	4.94	Membrane	237	MKKKGKAKRWLVNILLFLLLLVGLALIFNEQIKDYFVRETGDKYAIANVTKEDLKKNNDKDVSFDFDAVEPMTTEGVMRSQMRGTDLPVIASIAVPSVSINLPVFKGLDNTSLLYGAGTLSPDQEMGKGNYALASHRATNPELLFTPLENLEMGAKIYLTDLENVYTYKTFFKEKVAPTDTQLLNEVEGKEIVTLITCGDMDAVTRLVVQGELESVTSIKDATDDMRSAFNLETKTF
97	AMQ97070.1	ylbL	peptidase	0.1387	37935	5.03	Membrane	347	MKAKQWLKTVLIIIFGMLIIGFVVVPLPYYVESPGATIDLKELITVNDKEDKGSGSFSLTSVGIRQATGFLALKAKMTPFEELISEEELTGGATNEEYNQMQQYYMDSSQNAAIEQALKLADKPYKMEFKGVYVMSVEKTSNFFGKLSVGDTVTKVDGKSFQSTEAFMDYVKSQKVGQTIEISYLHNGEEKTASGDLIELPTDKKAGIGITLTDHTEIESDTDVRINSGSIGGPSAGLMFTLEIYEQVTGKNLRHGKQIAGTGTINSEGEVGRIGGIDKKVASADKAGVEIFFAPDDTISDDVKKEYPEIKTNYEEAKAAAKKLNSSMKIVPVKTVQEALDYLEKMK
99	AMQ96701.1	A5810_000307	hypothetical protein AX771_03520	0.1359	4287	10.46	Membrane	38	MREKKQTSTFAKVTKFVIWTMLILTIGSVVLTAVMSVM
101	AMQ96674.1	dltD	D-alanyl-lipoteichoic acid biosynthesis protein DltD	0.1343	49172	9.41	Membrane	422	MKKKLFAIFGPVVLAVGLLFVFFTSSYQVDISNPETIRRASSSMSVNVLKGDAIKNYALSEKQYIPFFGSSELSRISPFHPSVLAEKYQRNYRPFLLGAPGTQSLSQYMMMRSAGDAMKNKKVVFIISPQWFVKNGVKTDYFNTYYSELQTYDWLFSMKKVTPADRYLARRLLTFSKVKENDTLTAILQTIKKGKLPLPESLNQLRSQWNMLKREDEVFSNIGLKDRQQKIDHESKRLPKQYQETELSILANQIGERETTNNPFGLKNDFYTHRIRAHEPELKQSQKNWDYRFSPEFSDFQLVLDQLAKNHNEVLFIIPPVNEKWSDYTGLSQEMLQGFAKKIKFQLNSQGFNRIADFVNQAGTNYFMEDTIHLGWKGWLAADQQIRPFLEENHITASK…
102	AMQ98432.1	AS238_00635	FMN-binding protein	0.1326	33664	4.67	Membrane	311	MKKKRFVTGFAVLAFSALVLGACGADDNGSSNSSSESSTAQSSTAKSTTESSAKVVAGGDLQDGTYKLEEKNYSNGYRAVFEMVVKDGKITESKYDNVNENGESKTKDAEYNKNMEAKSGTNPEKYIPELNDQFLKAQSASGVEVVTGATHSSESFQNYAQQLIQAAQAGNTDTIEIDNGADLKDGTYKLEEKNYSNGYRVQFEMTVAGGKVTESNFDYIDKDGKSKQDDTEYNENMKAKSGTEPKTYIPTLNDEFVKAMGEEDGSPANVEVVTGATHSSHSFIMYAQQLVNAAEKGDTQTIEVDNIVTEK
107	AMQ98234.1	pbp2A	penicillin-binding protein	0.1238	79388	5.35	Membrane	723	MDFQSILEKIKAALISFWRWIRPYLGQFHRWRKRIWKKYHVNKLILLIGLICVLVTSIYLFILAKQANVETLKSGLSQSTVIYDKKNEEAGTLYAQKGTYVELNAISPYIQDAVISTEDRNFYEHHGFDIKGIARAAVRMVLSGGTSGGGGSTITQQLAKNAYLTLDQTFDRKAKELFLAIEIEKKYSKEEILTMYLNNAYFGNGVWGVQDASRKYFGVDATNVTLSEAATLAGMLKGPGIYNPIDHPKNANDRKNTVLSVMEENGKITKEQEQAESQTDISAYLNDTYDNSDSGYRYPYYFDAVIDEAVNEYGLDEEDVMNKGYKIYTALDQDYQKQLEATYQNSALFPANASDGAMVQSASVALDPNTGGVQALVGRRGDHVFRGFSFATQMRRSPG…
113	AMQ98271.1	ftsH	cell division protein FtsH	0.121	77546	5.25	Membrane	703	MNKKNNGMMKNALYYVLVILAMVMVVYFIFGNNGQRSSDIEYSKFTEQLQAGKIKEFEVQPANGVYKITGEYKEQQTVANSGGLAILGSTDTTTTHFTTIILPNDTTLSQVTELAKENKVATTVKEESSSGIWVSLLLSFLPIVIIIFFFYMMMGQQGGGGGGGGRVMNFGKSKAKEADKKANRVRFSDVAGAEEEKQELVEVVEFLKDPRRFVELGARIPAGVLLEGPPGTGKTLLAKAVAGEAGVPFYSISGSDFVEMFVGVGASRVRDLFETAKKNAPAIIFIDEIDAVGRQRGAGMGGGHDEREQTLNQLLVEMDGFDGNEGVIVIAATNRSDVLDPALLRPGRFDRQILVGRPDVKGREAILRVHARNKPMADDVDLKVVAQQTPGFAGADLEN…
116	AMQ97747.1	ftsX	cell division protein FtsX	0.1171	33438	8.94	Membrane	297	MDTMIRTFFRHLLESIKSLKRNGWMTVASVSAVTITLTLVGVFMAVIMNATKLAQDIEGNVDVSVFVDIGTKDEEMKKLEKELNDLDHVKKVEFSSKEQELKKIQNEMGDSWKLFEGDNNPLYDVYVVSATDPSYTKQVAEEAADLKNVSRSDYGGASSDRIFQIAGAVRTWGLVAAALLLFVAMFLISNTIRITILSRQREIQIMRLVGAKNGYIRWPFFLEGGWIGLIGAILPILIITFGYAWFFQLINPSLLRSHYSLIHPQNIVWKINLLMVGIGVIIGSLGSIISMRRFLKF
119	AMQ97665.1	AS238_12185	peptidase	0.11	19835	9.52	Membrane	175	MKIKERRPLKKKQTKEKTINRVLLGLIVFLLAVIVISSIFYLRSSRPAVQAKKEAVEIAKKYANLEETDHFYWFTRKKTYFSLTGTNDKGKEIAVIIPKSGEKVKVLDQTKGLTENEAKQTIAAAHPEIQIEKAALGMYDDQPVWEVVGKETNGKLNYYLIGFESGDEVKTIKGI
123	AMQ97116.1	AS238_08440	alpha/beta hydrolase	0.1083	35084	5.55	Membrane	311	MKLWMKILLGVALALIVALVFAGNYFYNYAVVPSEKDFLDEDTPGTTQTSKETDAHKWFSSKENRSDWTITSKDGLKLSAIYLPAETKSEKTALVAHGYMGNAETMTNYAKMFHDMGYNVLVPDARGHGKSEGDYIGFGWPERKDYVQWINKVLENNGKSQEIVLYGVSMGAATVMMTSGEKLPDNVKAIIEDCGYSSVHDELAYQLDDMFSLPAFPLMQVTSLVTKVRAGYFFGEANAVEQLKKNQRPMLFIHGDEDTFVPFEMLDKVYRATKGPKEKYVVKGAEHAEAYKTDPEKYQQVVQQFLSQYVH
125	AMQ98017.1	AS238_05070	hypothetical protein AX771_11380	0.1039	29837	5.73	Membrane	255	MTFLLDLINGVHKFLGYLDISPKYLNRGYTILSVIPTLYLLRIVYGLWQNQNYLQFFLYGLAFLVLVYFTVLNVFYYFLDKNTKADVTQLFVKYLPDEAFNIQTEESIDNGNSIDKVNTQEVMVSYDEDYQLKLAENMRYLIGNGEIKTNELGRMDGFLVDRNTLYPYYYVKKTGEKEYVLNIGRSYSDMEKVGTIRLDSTEDTLEPVGLFIVGGDFVKDGLRYHEPYRLKLIAKKAQSQEEPVVYSRSQRRRHS
127	AMQ97217.1	AS238_03415	hypothetical protein AX771_06615	0.1028	14556	6.59	Membrane	130	MKKIIYSLLAMSVSILILTSCSTTYTQSASNQKEEVKTSQKATITLQENGQNFSEKEVVFKKGDDLLSILKRNFEVKEDNGFITSLEGHSQDEKNQLYWMFTVDGKSATTGAKEIKLNDGQSVIFNLSKL
128	AMQ97775.1	secG	preprotein translocase subunit SecG	0.1017	8436	9.99	Membrane	78	MYNLILGIVIVLSIVMVIAIMMQPSKQNSAASAFTGGADQLFGKQKARGFEAVMQRSTAVMGAIWMILLFVLAYLSSK
130	AMQ98288.1	pknB	serine/threonine protein kinase	0.0995	74904	4.67	Membrane	689	MIELGKKLNGRYQITGNIGSGGMANVFLAHDLILDRDVAVKVLRFDFQNDQTAIRRFQREALAATELVHPNIVSVYDVGEEDNMQYLVMEYVKGMDLKRYIQTHYPVPYETAVNIMQQILSAISLAHNHQIIHRDLKPQNVLIDNEGVVKITDFGIAIALSETSITQTNTMLGSVHYLSPEQARGSMATKQSDIYALGIILYEMLTGSVPFDGESAVTIALKHFQDDLPSIKALDPNVPQALENVILRATAKEPADRYKSAEEMSDDLSTVLSPARANEEKWQPHVMDNETKVITPLTEDAPMPDSFKSMPLPKDKPENETLPEEEEVLPDPKKKGQKKWWLILLAILAVLGIGTAVFFASGGRGEVVVPDVSDLSEASARETLAKAKLEVATKTEEIA…
132	AMQ98000.1	fliY	amino acid ABC transporter substrate-binding protein	0.0989	30790	5.05	Membrane	271	MKKTSFLFALIAGLLLFAGCSNKKTSADNWATINEEKKIVIGLDDTFVPMGFRDKDGKLTGFDIDLAKAVFEQYGITVDFQPIDWSMKEFELNNGTIDLIWNGYSKTPAREKKVQFTKPYMENDQVLITPKESGITNFGQMNNKRLGAQNGSSGYDVFTKQPEVLKEIVKNQDAVLYDSFNEALIDLKSRRVDGLLMDKVYADYYLKQRNELEDFNITKGSYESEDFAVGARKSDSTLVKKINEALDQLEKTGEFQKISDKWFGEDVTPRN
136	AMQ97730.1	AS238_07655	general stress protein	0.095	15270	8.86	Membrane	146	MSGGEIAGLIAAIAFAILVVFIVRVLLQVSKTLEKVDQTVAEANTTIEIVTKDVDLLSRQVEGLLVKSNELLLDINGKVATIDPLFTAVADLSESVSELNHSSKNIATKVGGIGKTTAKATVAGKVGGTAMKFFKNKKHTETTGGK
137	AMQ96657.1	AS238_06480	hypothetical protein AX771_03255	0.0934	28663	5.48	Membrane	261	MFLFFLLLVSVGWPVATHADTATVNDEAGLFTTDQIQSLEQQAEKLNEKIKGRVLIVTTTSNSEEPRDFADNYLRDAVGNDQNGSVLLLDMGQREIYISTSGNMIDYLTDSRIDSILDDVYDQMTNAAYYNAAKAYLSKSATYVEDGVPGGHYRVDEETGKITRYKVLTTVEIIIAVVLALILSLVFYFVTVSRYQLKSGIYKYPFREKSSIKLTEKTDRLTNSFVTTRRIPKSPPPGSGGGGSTTHSSGGGTFGGGGRSF
138	AMQ96186.1	oppF	peptide ABC transporter substrate-binding protein	0.0912	35720	9.15	Membrane	314	MTELITIKDLKVHYPIRSGFFNRVTDHVYAVDGVDFIIEKGKTYGLVGESGSGKSTTGKAVVGLEKVTAGQIMYEGKDVTKRSNRKKMGYNKDVQMIFQDSMSSLNPKKRVLDIIAEPIRNFERLSDQEEKKKVKGLLDIVGMPEDALYKYPHEFSGGQRQRLGVARAVATNPKLIVADEPVSALDLSVQAQVLNFMKRIQQEYGLSYLFISHDLGVVKHMCDNIAIMYKGRFVEIGTREDIYNDPRHIYTKRLLSAIPQIDVENRESHKENRRRVEQEYIQNQKEYYDATGRVYDLRTITTTHKVALKDGGAS
141	AMQ97806.1	ntpK	ATP synthase subunit K	0.0884	16040	6.54	Membrane	156	MMDYLISQNGGMVFAVLAMATATIFSGIGSAKGVGMTGEAAAALTTSQPEKFGQALILQLLPGTQGLYGFVIAFLIFINLGNDMSVVQGLNFLGASLPIAFTGLFSGIAQGKVAAAGIQILAKKPEHATKGIIFAAMVETYAILGFVISFLLVLNA
144	AMQ96863.1	AS238_15750	cell division protein FtsI	0.0856	78806	5.41	Membrane	717	MMKDFMKKILNTSWLEKIRKGAQEPKNKTFRRSHVPFRLNFLFFIIFTLFVALIARLGYLQIVNGEEMEARVKSTSTITVQESTPRGMIYDSTGKALVTNKANQAITYTRGTQVTAKDLLEIATKLNSLIDVPVDENLTDRDKKDFWLADPKHLKEATKRLSAKEKQLGNSEQYSAMVNKVTADEINLNEEQLKIATIFKRMNSAYELNTVYIKNSGVTDQELAVVAERASELPGVSTGTDWTREYNAASSLKSILGSVTTEKQGLPADEAEKYLAKGYSRNDRVGQSYLEKQYEDVLQGTKTQYEVSLDNEGNVSNQKEIFSGEKGSNLMLSMNAEFQSKVEEILKRNYQTLINNGKAQYSPGAYAVAMNPQTGEVLAMTGFSHEQGSKEITENALGT…
146	AMQ97154.1	ebsA	ebsA protein	0.0834	16814	10.09	Membrane	143	MKKNIRWQPELAHTIIYWSLTLIILFFSLILSLENTGPYWKSNFVLGIFLVFLFLGLRRSFILKSNSVIIRYAAFWKDREISVGQIRSLTPTNTGVQMMLQDEKAPSVFMMRKKDQVVLFDHFEKNGPKSESIPYPYTKKRKS
147	AMQ97745.1	pstS	phosphate ABC transporter substrate-binding protein	0.0829	31018	4.77	Membrane	285	MKKLKLFLPIIGLAILLSGCSKWIDRGESITAVGSSALQPLVETVAETYQTENPGKFINVQGGGSGTGLSQVQSGAVDIGNSDLFAEEKSGIDASALVDHRVAVVGITPIVNKDIGVKDISMENLKKLFTGEIKNWSEVGGKDQPVVILNRASGSGTRSTFEKWVLDGETAVQAQEQDSSGMVRQIVADTPGAISYVAFSYVSDDVDTLNVNGVEPTDENVTTNKWTIWAYEHMYTRDHPKKLTKEFLDYILSDEVQDNIVGELGYIPVSHMKVERDWQGNIVKE
148	AMQ96541.1	metQ	methionine ABC transporter substrate-binding protein	0.0829	30966	4.78	Membrane	282	MKKKIFGFAAALLLTVGLAACGNNSDSKDSANKADDTTLKVGASPTPHAEILEHVKPLLKDEGIDLEIVKFDDYVLPNQSLEEGDIDANYFQHIPYLNKEIKEKGYDFVNAGAVHIEPMGLYSKKVKDVSELKDGATIITSNSESDWGRIITILQDAGLVKVKDGVDLETATFDDIEENPKNLKFNHTIDPSLLASTYQNDEGDLVAINANFAYGAGLNPLEDAVLLEKDNSPYVNIIATRKGDEDSDKIKKLIEVLHRKEVQEWITDKWGGSVKPVKADAK
149	AMQ97363.1	aes	lipase	0.0823	38305	6.25	Membrane	337	MKKKILKFIGWFFGIILGIAFAIFLAFQLSPRPGAFLINHMFSNTVQITDKKTFDQAEKNVAKKTDLTYESKYKENTYDIYYPKNSKGPVPVLFWVHGGGFVGGDKSGVKEFATKLVSDANIAVVAMNYELAPDSEYPNQVLQVNELIKDLLAEEKDDKLLDMEQLFFGGDSAGSQIALQYAAIQTNDAYAKQMKIKQLLPKDSLKGTISYCGPVDLKLTAQQHSDDRFMKFFVKTVAWSLIGTKDWKTSEQLKEASVADHVSKEFPPTYITDGNAYSFQEQGQALENRLTELKVPVQSLFYTDTKKEITHEYQFDYTLKESQNCYQQTLDFVNKYK
153	AMQ97701.1	CUS02_07835	tyrosine protein kinase	0.0796	28234	7.85	Membrane	259	MEETISLKEIFETLRKHLVTIIISMFAGLAISGIVTFFILTPKYSSQAQLIVTLPQSDTANVNDVNTNLQMINTYKDMIVSDLVLNEVKDRLETEDNVKMTAGQIKDAISVNQSQNSQMFSIQAISTNAVTAQQIANTTSQVFQENAKDVMNVDKISIISGAVANTTPVSPNNKLNLVIGLVLGMMVGVGLAFLFELLDRTVKDEKYVTDTLGFPILGTVPEMSAKELNAGIRKKGTAPARPKATNDKTAPSRRSRSRV
155	AMQ98337.1	AS238_11495	mannosyl-glycoprotein endo-beta-N-acetylglucosamidase	0.079	46765	4.79	Membrane	422	MKAKNLLFSVILLGNLAVANTTVLAEESTETVATQTSSSSETGIENDTESTLQSATVSENTISTEEPTTETTEQTQTEDSTSAEAQNNPENAEEITNQLTDGQTLTHTHQADLSEFENYTGYAFYARSSANSQQAFIDSIASTAQSLASANDLYASVMIAQAIVESGWGNSTLASAPNYNLFGIKGSYNGQSVTMPTSEYVNGQWITVNAAFRKYPSYKESLQDNVTVLKTTSFQPGVYYYSGAWKSNTNSYKDATAWLTGRYATAPNYGSTLNNVIETYNLTQYDTAPTSTSPMYRLYNRHTGEHLYTLNAGEKNYLPTVGWEYEGIAWQAPNSGQPVYRLYNPYSGDHHYTMAQSEINSLTKIGWRYEGLSFYSGGSKPIYRLFNPNEKTGTHHYTL…
158	AMQ96277.1	yajC	preprotein translocase subunit YajC	0.0763	14091	4.49	Membrane	126	MGTLPMLVMFIALLAMWFFMSRSQKKQQQERQNLLDSMKPGDSVVTIGGLHGVVSEIDNDKRTVVLDCEGIFLEYDRAAIKTVKPGTVVTNDATTTVETTEEPAETVEVKTETTETLEETEEKEEK
162	AMQ96632.1	potD	spermidine/putrescine ABC transporter substrate-binding protein	0.0746	40951	4.78	Membrane	357	MKKLQSLFLGILIIIAVLLLGVRQLEKTSGMSGAKVLTIYNWGDYIDPSLITKFEKEYGYKVNYETFDSNEAMFTKIQQGGTNYDIAIPSEYMIQKMIKEKLVLPLDHSKIKGLNNIDPRFLDLDFDPDNQYSIPYFWGTLGIVYNDKFFDANQIKHWDDLWKPELKDSLMLIDGAREVMGLSLNSLGYSLNSKNMAQLTEAANKLNHLTPNVKAIVADEIKMYMINEEASVAVTFSGEAADMMWENEHLHYVIPPEGSNLWFDNIVMPKTVKNKEGAYDFINFMLEPENAAQNAEYIGYSIPNEEAKALLPKDISSDEQFYPSDDTISHLEVYKDLGSKYLGIYNDLFLEFKMYRR
163	AMQ97370.1	fruAB	PTS fructose transporter subunit IIC	0.0746	67578	5.33	Membrane	643	MNIKDLMVKEAMIMDLQATDKKGAIDEMVQKMFDAGRISDIETYKEGILAREAQTSTGLGDGIAMPHAKNSAVKEATVLFAKSQKGVDYEALDGQPTYLFFMIAAPEGANDTHLQALAALSRLLIDADFVGKLKEANTPEEVQDLFQTAEEQKEAEEKAEQETQAAEASAHPERKFVVAVTACPTGIAHTYMAEDALKKKAKEMGVEIKVETNGSEGIKNRLTAEDIARAEGVIVAADKKVEMNRFDGKELINRPVSDGIRKPEELINLALSGTAPVFHGDGKESSSEEGNADGTIGQRIYKDLMNGVSHMLPFVIGGGIAIALSFMIDQFIGVPHDQLSNLGNYNQAASWFNQIGQAAFGFMLPVLAGFIASSIGDRPGLIVGFAAGALANTGGAGFL…
171	AMQ97468.1	CUS51_01200	hypothetical protein AX771_08075	0.0691	11132	9.05	Membrane	97	MINLGEWGAIAGSITAIVSLILLVIRPIVASFTKITKTLSQVSYNLELLTKDLESSKSDRLMIHEELKKHDERLDTHAEKLVEHTQQIKTLFRERRK
174	AMQ96728.1	B1P95_06695	hypothetical protein AX771_03700	0.0674	23521	5.27	Membrane	211	MDGIFGFTGIVLFIIGLIMLIVRFIKKTNKKTPMILLIIGIIFTTVGFSLSSSNEANDNNKQESSSSDTQTTTSNSSNKSLTQFEEFLETNNHDWGAFLDSYYSITPATEQNTAFTKYISGKTYTFEGTVIESMTTRIAIIADKEYDDKSWNDISATPKVSYVIFAKDLNNADTFTKGDKVTFTGEISSRGSNIEKSYAQWDMINSKVSKK
176	AMQ96805.1	mltG	aminodeoxychorismate lyase	0.0669	44200	5.28	Membrane	391	MSGNKQHPSKDKKEASKAATADIIDKRRNLRKKEDKIVRKIILVIALTLLIIGGFLGFTVYRYVDSGLKPLDKSDDQLVQVEIPSGSSNKQIGEILEKDNIIKSGIVFNYYTKFKNLTGFQAGYYQLAPNMTLDEIGKQLQEGGTSEPTKVADGKIAIPEGYDIDQIAERVAKVTGKDKKEFLDLVNDETFFNELYQKFPELLESASKAENTKYRLEGYLFPATYDYYTSTSLKNLVIEMVNKTNTVMQNYYSAIKQKNLTVQEVLTLASLVEKEGVKENDRKNIAQVFFNRIKANMPLQSDISVLYALGEHKELVTYEDTAVDSPYNLYTNTGYGPGPFDNPSEEAIKAVLEPAENDYYYFVADTSTGNVYFAKTYEEHMELVQKYVNNS
185	AMQ97105.1	artQ	glutamine ABC transporter permease	0.0641	24411	9.04	Membrane	218	MDFSGAFSWMNIRFLLEGLKVTVEVSLFSIIFSFLIGGLTGVIRFANIPFFSKILGVVIDIIRNLPLLLIIFFTYFALPQIGIQMNIFWSAVAALTIFESAMLSEIFRAGLNAVPKGQMEAGLSTGLTYVESMRTIVLPQAFKSMIPAIVSQLISLIKDTSLAVIISLPELSHQARIIYGQNTNYVLPMFIIMTLMYFVVCYALSLLSGYLEKRRYSY
187	AMQ97871.1	A5810_000385	hypothetical protein AX771_10475	0.0635	20308	5.78	Membrane	175	MIVGITGLIGVLTGAVVVYIGMILQMRHLENKEQRRRELELKVKEIETLNQLNKKINEILQKRTTLMEEYVSFDAFDDCYITIDDFAYLQSFSAQNSFYLPNYILDELFKNISHRKVILSPDETMKIGGYAYKGGRVILENFTDSLTEMINEKKAQLKTMTRQPIGFFSKDDVWS
189	AMQ96560.1	prsA	peptidylprolyl isomerase	0.0624	33391	5.19	Membrane	303	MKKRFLALAIVLGTGLLSGCTNAGEKTAVSYKGGTISEQEVMDSLKKMQGADSAVQQLIVYQVFEDKYGDDVSTKEIDSQYDQTKKQLGDSFDSQLKSAGYTEQTFKDSIKQSLAFQEGLKKHIKLTDEDLKTAWESFHPEVEAQIIQVASEDDAKDVKKAADKGDDFSKLAKDKSTDTTTKEDGGKVKFDSTTTTVPAEVKEAAFKLKDGQVSDVITSTNASTYTTEYYVVKMVKNQNKGNDMDKYKKELKEIATDTKLSDSTFQNKVIGEVLKDANVKIKDKDFENVLSTFTSDSSTASSK
190	AMQ97122.1	AS238_08470	hypothetical protein AX771_06080	0.0624	16329	7.88	Membrane	144	MKKQSNVILGFVLVLIIVLFAVLNNKNVPVSFGFTSFSAPLILVIIGSALIGALIVFLTASATLWQQKKQIKQLTQEMSEYQTELQKKIEEAKEEQQREFRNERAELEAAYQAELQAKTAQISQLKAPEEQKTQSPKQSFNYFD
192	AMQ98316.1	mscL	mechanosensitive ion channel protein MscL	0.0608	16681	4.56	Membrane	153	MIKEFKEFIMRGDVLDLAVGVVIGSAFTSIVNQVVQGLITPLIGWFVAMITGTSDLEGALSILDWSPTKGVTFAFGNVISAIITFLITGFVLFLVVKAANRAKNLRSKEEQVEVEETPTAEDYLSDIRDLLAKQVAEDNTHPVEQTNLSDTSK
193	AMQ96196.1	fetB	iron ABC transporter substrate-binding protein	0.0602	34302	4.52	Membrane	317	MKKLVVGILILASFGLAACGNSNNTSQADTKKSSTQTETTLTITDSNGDQIEVPNNPEKVVVFDNGSLDTMDALGVGDKVVGAATSSLPEYLSSYKKVESAGGIKEPDLEKINQLQPDLIIISGRQRDFQKDLSQIAPTIFLSLDAKNPWESFQQNVTALGEIFGKQEEAKTQLEELSSAIDQTKKKAEATDKKALVTLVNEGQLSAYGSGSRFGFIHDLFGFEQADDQIEASTHGQSVSYEYVLEKNPDILFVVDRTKAIGGDDSKDDISANELVAQTNAGKNQQIISLEPDVWYLSGGGLESMKLMIEDVNQAFK
196	AMQ97679.1	yidC	OxaA precursor	0.0586	34963	9.86	Membrane	316	MNKWKNWLLGSGLVSILLFLSGCVRMDSNGNPDTSGIVYRVLVHPMGQAITYLVENFNWSYGWAVIAMTVIVRIIILPLGISQSKKTMIQSEKMQALKPQVEAAQQKLKAATTREEQMAAQAEMQQVYRENGLSMTGGIGCLPLLIQMPIFSALYFTARYTEGIRESSFYSIDLGSPSMVLVVIAGVAYLLQGYISTIGIPEEQKKTMRTMLIVSPAMIVFMSISAPAGVTLYWVVGGVFSCLQTFITNVMMKPRLKAQVAEELKQNPPKQVVTPRKDVTESAKPANNKQATKQIKQPKNSTNNKGRNAGKQQKRK
197	AMQ96771.1	hol	holin	0.0586	8072	7.88	Membrane	74	MNNKTFEVLKWFALVIIPALATFVGLVGKALNWQYTDICVVIITGFGAFLGSVLGVSNRTYKMFSAESEEGGNK
201	AMQ96835.1	B1P95_04310	glycosyl transferase family 1	0.0575	40166	7.1	Membrane	348	MKVLLYFESEKMLAKSGIGRALDHQKRALTEVGISYTLDEKEDYDILHINTYGINSHNMVNKARREGKKVVYHAHSTEEDFRNSFIGSNQLSPIVKKYLVGLYQKADYLITPTPYSKQLLESYGIRVPIQAISNGIDLEKYHPDPMKEQKFREYFKLSPDQKVIICVGLFFERKGIIDFVEIAKKMPEYTFIWFGHVPMYSIPRNIRKIVKEDHPENVLFPGYIRGEIIEGAYSGADLFFFPSYEETEGIVVLEALASKQNVLVRDIPVYNGWLEDSKNCYMGKTNEEFIRLIQQITNQELPSTTQAGYQTAKERSINKIGEELKNVYESVLNEKVSSKLKKVNQVKD
202	AMQ96531.1	AS238_09045	glucosyl transferase family 2	0.0575	35555	5.66	Membrane	315	MKVSIVVPCFNEEKTVPLFFDEVEKFKGAHEFEYLFIDDGSKDGTLAAIKKLASAYPYVRFVSFSRNFGKEAALYAGLQASTGDLVTVMDVDLQDPPELLPEMINRITTSDIDCVGTRRSTREGEPAIRSFFAKKFYQLINKISDTEMVDGARDFRLMTRQMVDAVLELTEYNRFSKGLFSWVGFKTEYISYENRERVAGETSWSFWKLFNYSIDGIVNFSDAPLTIASFIGALSCVGSGIAILFIILRALLFGDPTSGWPSMVSIFLFIGGIQLLCLGIIGKYIGKIFLETKQRPVYIIRETEKVKPNELKPHQ
204	AMQ97159.1	lspA	signal peptidase II	0.0564	17590	8.61	Membrane	154	MLIIYWIFSALLVGVDQLVKWWITDNLALGETKNLIPGILSLNHIRNTGAAWSMLEGKMWFFTIVTLIAVVVILTLMIKNREKGNRWFMIGLSLILAGAIGNFIDRIRLGYVVDMFQTDFMSFPIFNVADVTLVCGVICMLIYIILDEKDQRKK
206	AMQ96955.1	AS238_06285	carboxymethylenebutenolidase	0.0558	27049	6.54	Membrane	245	MKIFRRILIGLVIILGLLGGAGYYYIQQNTYEPSSEAQVLVKEGKNKEDYLFFEGEKKNHGKSPLLIFYPGALVEPESYSIWAQDLAKNGFSVAIVKMPLDLAVMGGNKADKVKEDFPNSDYVIGGHSLGGVMASRYVNKNHSDKHLKGVFFMASYPDKKGTLTESAVPVLSITATKDKVLNQEAYQEAKQYLPERTEYVSINGGNHGGFGSYGEQKGDGEAEISNADQQTVIVNTLENWLKKLK
209	AMQ97726.1	AS238_07635	transglycosylase	0.053	86366	5.54	Membrane	781	MPRKNTRKKQNRRKKEKWFVPKIIFRVFQSLTVFITVLLLMFAALGIGIGAGYFAYLVEDTQLPTKKALQTELGNITETSKIVYADNTEISKIQTDLMRTTISFDKISPLLKTAIISTEDEYFDKHQGYVPKAVLRALVSEATGIGSSGGSTLTQQLVKQQILTDETTFKRKANEIILSAQVEKYFSKDEIIATYLNVSPFGRNNKGQNIAGVQEAARGIFGVDAKDVTLPQAAYIAGLPQSPITYSPYTNTGALKEDLSAGLARKDFVLFSMYREGQITKEQYEEAKAYDLTKDFLPQQIAEQTDREFLYYTVMNEATRIIAQQLAEKDNADMSDSSVSDAYYQKAQQTIQNKGYTIHSTIDKDVYAALQNGVENYGYMLDDGAGSQVETGNVLMDNR…
212	AMQ98664.1	BU186_14090	sugar ABC transporter substrate-binding protein (plasmid)	0.0525	47826	4.38	Membrane	437	MKKRMLAIAAILALTAGGLAGCGSKEKSSGSSDPGEIKIWVQFSDETPEGKAWAEIVNNFNDEYEGEYKAVTEYIPRSGSGGGYEDKVNAAITTNTLPDVITLDGPNTAAYAHSGVIAPLDDYLKDADMDDVLDSIIQQGTYDGKMYAFGFSESSVGVYYNKSLFKDAGITEDQLPTLEDPWTWTEFQAICQKLTDKYKTPAIDMQMASGDEMLTYAYTPFIWSNGGDVVNADGTKAEDYFNGKKSVEALEFIQELVEKGYTTISPIEKGFETGKYAMMLSGSWTMADLEENYQEIDYGILPYPVSDATGELVSPTGSWQLAMTEKTEKKDASAAFIKFATSTESSRIMSLGNSVLPIRNSTVDLIKDEVSEGMQVLIKQNQLSGHARPVVVAYPQVSR…
213	AMQ96188.1	AS238_05830	peptide ABC transporter permease	0.0519	33511	9.69	Membrane	304	MSEKNNTAVQESIPPMGIRMIAREFKKDKIAIFSLGLLVVLLLVIFIGAMLTDQDKVMYVSIFDKYAAPGTVSTQGQKFILGADEGGRDVLGQLIIGARNSVTIGFAITILTSIIGVGLGIISGYYGGIIDNILMRIVDFIMILPIMLIIIVFVSIISRYNVWSFIFIMSAFYWVAKARLFRSKTLSEARRDYVSASKTMGTNDFKIMFREIMPNLSSLIITNLTMNFAANIGIETTLTFLGFGLPANVPSLGTLIGYASNGEVLVNRQWIWLPASILILVLMLSINYVGQAFKRSADARQRLG
215	AMQ97925.1	AWT83_00130	peptidase S24	0.0514	28615	5.32	Membrane	250	MNEKLFPQRLKELRAEKGITLEELAKKIGTTKTTLSRYENGERSPKLQLVGLLANYFQVEMSWLSGQSDQRNSLNILPIYTQLSSPRQQKVYNFAKNELEEQNRSNVIQGNFGKAVDEDEKQEVSYVGLLSAGHGCPNYDKERPFGTVTMRESQIPSHYDLAFMVNGNSMYPTFENGEIVFIKQTPNVMNGQIGAVEINGEAFLKKMYVENRRLRLVSLNCECDENGNRLYPDFYADEYDDLYVIGRVIV
216	AMQ98279.1	AS238_03145	hypothetical protein AX771_13090	0.0514	18842	9.64	Membrane	168	MNSSKKQMKNGNIYLVIALIVVIILFYSSSQTYGQQSQVSRLESWLPNQPFKDTLAGIRFNYGGSMVSIDHLGYAKFLEFFLRKGAHFGTYFILGGSLFLGVFPKLKIWWLTAILAWLSATGYAGLDEFHQMMTGGRTPMFQDVMLDSIGALTAVILCVLFAAFKKRL
219	AMQ97769.1	atpF	ATP synthase F0F1 subunit B	0.0503	19157	4.9	Membrane	174	MLNQLAIAEVGNAMLGNVIVVSGSFLILLALLKHFAWGPISDILKKREDKIANDLDSAEQSRINSAKMEQEREQQLLASRSDAADIIKNAKESGELSRQNILKDAQEEAARLKSKAQADITVERDSALNSVKDDVAELSLQIAEKILNKELSPEMHESLINQYIEGLGSSNETR
221	AMQ96136.1	AS238_00240	branched-chain amino acid ABC transporter permease	0.0492	39898	8.53	Membrane	377	MNDRSEKFRNLLVPVLSVVLGLILGAILMAAFGFQPIQGYSSMLDAALGSQRGIGETLRQATPLIFTALGFSVANSAGFFNIGLSGQALCGWIVSVWVALAFPDLPKVVLLPLCVILGALAGAMAAAVPGLLRAFFGTSEVIVTIMMNYILLYVSTFALHEVMPESYRSSLDSSNMISQNASLRLPWLTQAFGGSRVNSGLFLAIIALIFVWLLMKKTTLGFEIRSVGLNPFASEYAGMSSKRTIVLSMVISGALAGLGGVVEGLGTYQNFFVQTTSLSIGFDGMAVSLLGSGSAIGILLSAILFSILKIGGLGMQTGAGVPFEIVNVSIALIIFFVGINFLIRFVMAKVFQGKKQEEIVATIESKPTNQNHEGGEL
222	AMQ98305.1	adcA	zinc ABC transporter substrate-binding protein	0.0486	35055	4.71	Membrane	312	MKKYLLTATVMIGALLFAACGNTNKEADKKEDLTIVTTFYPMYDFTKEIVGDEGNVKLLIPAGTEPHDFEPSAKERAEISDADVFVYNSSDMEFFVDSLKDSVDSKQTLMIEAAKGIDRLESQEADEHEESEEGHGHSHEYDPHVWLDPVLAIKEVRTIAEELGEKYPDKKETFTKNADAYIKKLEALDQKYSDELKDATNRTFVTQHAAFAYLANQYDLKQVAISGVSPDQEPTPSRLAELKEFVKKNNIKVIYFEENASSKVAETLSNETGVKLEVLNPLESLTNEQIKAGENYISVMEKNLKALKESIN
227	AMQ96187.1	AS238_05835	peptide ABC transporter permease	0.0475	35780	9.66	Membrane	320	MWKTILRRVLLMIPQVIILSVLIFLLAQAMPGDPFTGLINPNQDPAVIEQMRQAAGLNDPWYVQYFRWIGNALQGDFGQSFLYKRSVADLIGERIINTLYLSILTVVLTYLIAVPLGMLAGRYQNSILDKIVVIYNFFSFAVPLFIFGLIMLFVFGYRLGWFPTSGSQTLGLQGGFITQWIDRLKYILLPSITQAFLATAVTIQYLRSEVIDSKSLDFVRTARSKGVPTNKVFSRHIFRNAALPMASQMGYEITSLIAGSVVIEKIFGYPGVGKLFIDSIGQRDYTVITSLVLILGIATLVGTLLSDIIMSIVDPRIRIQ
231	AMQ98277.1	AS238_03135	hypothetical protein AX771_13080	0.047	52024	5.04	Membrane	466	MTRSSHRKKSKHVALLSVLGVLLVLISFYTYRSTYYTKHFLPNTEINGINVSNLTVEKANEKLKEAYSDKKLAIKEDGKVWQEVPKSELGYKDDFTSELSPILNEQNGWTWGMTYVSAAEKQEIDPVSQNHQKLDTTVQTLTTKLTDLNKDRTPTTDATIEKAGDSFVIKPEVNGNTIDVDAAVKQLKSAVNSGKDTIELTEFKEKPKVTSEDSSLKEQLASMNAIANVKATYSINGETFQIPSSDIMSWLTYNDGKVDLDTEQVRQYVTDLGTKYNTSTNDTKFKSTKRGEVTVPVGTYSWTIQTDSETEALKKAILAGQDFTRSPIVQGGTTADHPLIEDTYIEVDLENQHMWYYKDGKVALETDIVSGKPTTPTPAGVFYVWNKEEDATLKGTNDD…
233	AMQ97743.1	pstA	phosphate ABC transporter permease	0.0453	31561	9.1	Membrane	294	MNAKRSDKIATGVLYVVSGIIVLILAALLLYILVRGIPHISWSFLTEPSKAYQEGGGIGIQLFNSIYLLLITMIISFPISLGAGIYLSEYAGKNWLTDVIRTSIEILSSLPSVVVGLFGFLVFVIQFQYGFSIISGALALTVFNLPLLTRTVEESLQAVHYTQREAGLALGLSRWETVIKVVVPEATPGILTGVILSSGRIFGEAAALIYTAGQSAPALDFTNWNPLSVSSPISIFRQAETLAVHIWKINTEGTMPDGVSVSAGASAVLIIAVLLFNFGARAIGKRLYRKMTSA
234	AMQ96929.1	yoaB	ATPase	0.0453	96459	4.95	Membrane	888	MENKEQAQQAVYKETIDSLMQQTQSSTDGLSTTQAKEKLERDGLNQLKEKPKKPTWKLFLETFKDAMVIVLLIVALIQMVMGDYIEFLVIFAVLMLNSIISVVQTKKAEGSLEALKNLSAPDARVIRDGKEKTIPANELVVGDIVLLDAGDYVPADGRLLDAGSLKVDEGMLTGESTSAEKEVTDITSTVPIGDRTNMVFSGTIVTYGRGKFLVTSTGNNTEIGQVAGLLESTTEQVTPLQRGLDKFSKKLSLAILALSLLILGIQLFRIYLGEGTGDMTADIVSAVMFAVAVAVAAIPEALQSIVTIVLSLGTNKMAKRHAIIRKLPAVETLGSTSIICTDKTGTLTQNKMTVVDYFLGNGDTGDFTNDPSKWTADERRLIEISVLANDASISEDGTK…
238	AMQ97670.1	HMPREF0351_11903	hypothetical protein AX771_09310	0.0448	4570	9.98	Membrane	40	MHLIMIFSLLSIISLFAFSASRLLDAETQPIPVKVRKNDR
241	AMQ97263.1	amaP	hypothetical protein AX771_06885	0.0431	21663	9.32	Membrane	188	MNKGLKIIGVIMSLLLLSVFLAIALINAPYIMPEQLERFRFFTLTNYYMQQYIFWAAVVFAVLAIIILLVVLFYPKSRGTFVMKREDGKLTIDKKAIEGLVRSHLHEEEFIHSPKVRIRSTKNRIHIHVNGDLKRTSSLVGKTGVLMQDIEEEVTKVLGTKETVKVAVTYSGYEEQEDTRDYKHSRVE
242	AMQ97766.1	atpG	F0F1 ATP synthase subunit gamma	0.0431	33130	4.98	Membrane	300	MGASLNEIKTRIASTKKTSQITRAMQMVSASKLTKSEASSQKFQVYATKVREIVTHLTATQLNDIASENPRGDINYNSMLLSRPVKKTGYIVITADGGLVGGYNSSILKQTMSILEEDHQSPDDYVMIAIGGTGADFFKARGINLAYELRNLSDQPSFDEVRKIVNMATTMYQNEVFDELYVCYNHHINSLTSQFRVEKMLPISDLDPEEATTFEQEYIFEPSKEEILSQLLPQYAESLIYGAIVDAKTAEHAAGMTAMKTATDNAANIIDELTVSYNRARQGAITQEITEIVAGASALE
244	AMQ97820.1	A5836_001478	ABC transporter permease	0.0431	38718	5.27	Membrane	356	MFLALNEIMHSKLRYALVAGVMFLIAYLVFFLTGLAYGLAQDNRTAVDKWEADSIVLSKDANSNLGMSMITKKIAEEVEGGKVAYLAQTPGVVTSKDSTEEGKINVSFFGIDKNQFIMPNLVEGKAFDNDDEAVGDISLKEEYGLAVGDTVKLSGSDKTFKLTGFTDHAKFNVSPVLYTTINAYQEIRFEKEDTSENARINAIVVRGKISNLPEDLEQIKISKFINELPGYNAQVLTFGFMIGFLIVIAAIVIGIFIYVLTMQKINIFGVMKAQGITGGFIARSVVAQTFILSFVGILLGLLGTVGTSLVLPDAVPFQSNWLFFGVISLLMLVVAVLGALFSVRTIVKIDPLKAIG
246	AMQ96458.1	cysM	cysteine synthase	0.0425	33149	6.41	Membrane	305	MIISTITEAIGSTPLYRFDNQHYSMPKGSAIYAKLEYLNPGGSIKDRLGSYLIKEGFAQGKINEKTTIIEPTAGNTGIGIALAALTYKLRTVFVVPEKFSLEKQQLMKALGAKIIHSPSEQGIIGAISKSKKLAEEISNSYLPLQFENKDNPAAYYHTLGPEIFHEIKENIHSFVAGIGSGGTFAGTSTFLKEKYPDIRIIGVEPEGSVLNGGDPAPHEIEGIGVEFIPPFLSPLSINQIETISDVEGFNYTRQLAREQGLLVGSSSGAAFAAALREIRRLPPGHRVVTIFPDAADRYLSKNIYL
247	AMQ96231.1	AS238_09475	ABC transporter	0.0425	27429	5.72	Membrane	246	MNEKIIEIKHLRKSFGENEVLKDISVTVNKGEVVTIIGSSGSGKSTFLRCINLLEKPTGGEIIYNGENVLAPKYNLPKYRTNLGMVFQSFNLFNNMNVLENCMSGQTTVLKRDKETAKKVAIENLEKVGMDRYIEAKPAQLSGGQKQRVAIARALSMNPDVLLFDEPTSALDPEMVGEVLNTIKDLAHTGLTMLIVTHEMEFAKDVSDRVIFMDKGVIAEEGTPEDIFVHPKEERTKEFLSRILNA
249	AMQ97400.1	racX	aspartate racemase	0.042	27922	4.73	Membrane	243	MENFFSILGGMGTMATESFVRLINHRTKATKDQEYLNYVLFNHATVPDRTAYILDRSEENPMPFLLDDIEKQNLLRPNFIVLTCNTAHYFFEELQAATDIPILHMPREAANELVRQHTTGRVAILGTEGSMKAGIYEREVKNLGFETVIPDTALQEKINYLIYHEIKESDYLNQELYYEILEEAVERLNCEKVILGCTELSLMHEFAEDNHYPVIDAQSILADRTIERALAERSEALDTASEK
250	AMQ96958.1	AS238_06305	peptidoglycan-binding protein	0.0414	22445	4.32	Membrane	211	MSRKDRHQSTENNETQEPWEQPIYDTDDEVSSRSSQRQQKKGNTLFLSLFLILLVLCIAIPAGAYFWIRNGSSNNATAATSSETSTSVVESSTSTTKEESTETSTVESSTIAEESTVSQDTGVTSESSIAAETTPTSSSEATYQAGDSSSNAAETTPSSSAAAGSTTTVQAGEGPKQVAERAGITTDQLFELNGLDPNNFMLYPGQELRIK
251	AMQ98438.1	walK	histidine kinase	0.0414	45551	5.97	Membrane	402	MTQDSKRATEKRRRINLTSKEISELLAEGIITIILLLLLNVSILVVISSVINSSPSLTNAIWDSKNIFAERLNTDLFWNGRNFIIPFFFLLDIGVLYWRLIRRYRQMQLRHIISELHYIANGNYDHRIPFELSGDLSRVVTSINGLVDSTVAAIEDERKIEKSKDELITNVSHDIRTPLTSIIGYLGLIEDGQYHSEEDLLKYTHTAYIKAKQMKSLVDDLFEYTKVRQPAVPVNFSAFDMIQLIEQLAADFELEASKKNIQILVQSKVDSLIMDGDTEKLVRVFNNLLTNALKYGKGATKIVIEVERIGSEVVATVKNNGAMIPQQAIDNLFDRFYRVEESRSQATGGTGLGLAIAQSIVALHGGYIYAKSDKQWTSFIMHLPIKKNEKLPIDTQEVI…
253	AMQ97428.1	eep	metalloprotease RseP	0.0409	46119	5.02	Membrane	422	MKTILTFIIVFGILVIVHEFGHFFFAKRSGILVREFAIGMGPKIYGHQAKDGTTYTLRLLPIGGYVRMAGNGDDETEMAPGMPLSLLLNSDGIVEKINLSKKIQLTNAIPMELSRYDLEDELTITGYVNGDETEVVTYPVDHDATIIENDGTEIRIAPKDVQFQSAKLWQRMLTNFAGPMNNFILAILLFIILAFMQGGVQVTNTNRVGEIMPNGAAAEAGLKENDEVVSVDGKEIHSWNDLTTVITKNPDKTLDFKIEREGQVQSVDVTPKSVESNGEKVGQLGIKAPMNTGFMDKIIGGTRQAFSGSLEIFKALGSLFTGFSLDKLGGPVMMYQLSSEAANQGVTTVISLMALLSMNLGIVNLLPIPALDGGKLVLNIFEGIRGKPLSQEKEGILTL…
256	AMQ96850.1	yqeH	ribosome biogenesis GTPase YqeH	0.0392	41268	6.33	Membrane	369	MTEELQCIGCGAVIQTNKPGELGYTPQTALEKGLASGEVYCQRCFRLRHYNEIQDVSLTDDDFLRLLNELGQKDALIVNVVDIFDFNGSLIPGLHRFVGDNPVLLVGNKVDILPKSLKKTKLTQWMKERAYEAGIRPVDVLLTSAKKSHEMTELLEKIEEYRDGRDVYIVGVTNVGKSTLINQIIKNTAGVQDVITTSQFPGTTLDKIEIPLDDGHFLIDTPGIIHRHQMAHYLGKKDLRIIAPLKEIKPKVYQLNEGQTLFLGGLARFDFISGNRASFIAYVSNDVNIHRTKLEKADEFYQKHVGGLLQPPRPDEVEAFPELVRFEFSVKEKTDIVFAGLGWITVTAPVVIAGWAPKGVDVLKRKALI
260	AMQ98002.1	yecS	amino acid ABC transporter permease	0.0387	23665	9.07	Membrane	213	MEYLIEVMPQLLVGALTTLKLFLFTLIGSLPLGIVLALGLSLHFKPLRYLLQTYVWVMRGTPLLLQLIFIFYGLPTIGIVFDRFEAALIAFILNYAAYFAEIFRGGIQSIPQGQYEAAQVLQLSPFQTVTKIVIPQVTKIVLPSVGNEVINLVKDSSLIYILGLGDVMRAGKIAMERDATLLPLLGVAIIYLTLTGILTIVMKQVEGKLNYYR
264	AMQ96658.1	AS238_06475	ATP-binding protein	0.0365	44056	5.06	Membrane	394	MDVLTHKCPNCGGPLTFDPKDQKFHCEYCLNIYTEEEVSQYEQKQKEARMAGEESKEEPSPTEDFTFTAQEQLADMNEAERKAVDEAGGFSDTADESADNTAAIDLFLCPNCGAEIVTDATTAATYCYYCHNPVVLSGRLSGEFLPNKVLPFAVEKEEAINRFLAWTKKKWFVPKAFFNKDQIDKLTGVYFPYWATDAEVDGAMQANGTVIRIWRIGDIEYTETKQFAVSRAGKLSFKELVKNALSKNTQQKMVEGVQPFPLDKAIDFKSQYLAGFQAEKRDIEYEAIKSQIQSELKDYSEKLLKDTANGYTTLTGVRTSASITNEVNNYVLLPVWLVTYRSNDSSKKVYYYAMNGQTGKVSGVLPISQKKLGLTALGIFAGLAILFLIGGYLI
266	AMQ97957.1	A5810_000434	peptidase	0.0359	25225	7.88	Membrane	235	MYGYGMYGFLDPTFLLVILGLVISGIASAYVNSTFRKYDQVRSKNNVTGTQAAQYILQSQQINNVGVQQIAGDLTDNYNSGNKMLSLSQATAQSTSVAAIGVAAHECGHAVQDASGYVPLKIRAALVPAANFGSMISFPLIMVGVLLSWNSTLINIGIFAFSLALLFQLVTLPVEFNASRRAIQILSEGGLLTEEEVPMARHVLFAAALTYVAAALSTFLQLLRLILLFGGNRRD
267	AMQ96275.1	AS238_01820	hypothetical protein AX771_00985	0.0359	25181	8.67	Membrane	232	MQSSAELKRQAKESLKGRWGQAVLLNLIPTLIGIATILLIMIPIILFATTIYDGSASVSEATTSGGGSSGGGGGIISSIISALFMSGISWTYLDILRGQKDQIEPFKDAFRGFKGLFIGGVISLAVLISIFTTLWGLLLVIPGIIKSYSYSQSYFIYYDIVQETGQTPKVLDTITASRKLMDGYKGQLFWLDLSFIGWHILALATAGIGYLWLSPYISATKAAFYEQLPKDI
269	AMQ97733.1	lgt	prolipoprotein diacylglyceryl transferase	0.0354	31755	9.19	Membrane	276	MLAQINRVAFELVGIPIYWYALIIVSGIIIAMWLSSREAVRVGLKADDVTDFMLWGLPISIIGARLYYVLFDLPQYIADPIQIFNIRSGGLAIYGGLIAGAITLYFFTKYHFISLWTFLDIAAPSVLLAQAIGRWGNFMNHEAYGPDTTRSFLESLHLPQFIIDNMYIEGIYRQPTFLYESLWSLIGFILLLFLRKKPHLLKKGEVLLCYLMWYSFGRFFIEGLRTDSLYFLGVIRISQLLSAVLFVGTLILFIWRRKKGNLPDYDRSLGKNQQII
271	AMQ98259.1	BU184_14325	ABC transporter	0.0343	66108	7.66	Membrane	594	MEKKKTLNTRALIRFWKMIKPEHKYFYGLFLCSLFGNLLVVAMPLIMGIGIDDLLSEIRKTGIGQLSFSDIKQALLFPVLLLIGCSVLSSITSFIQERTMAALSEKITLRVRKEITKKFKTLPMSFFDNHQVGDIISRTTTGLNQLSQVLLTGINQFFTSVVTIAAAGLMLFYIESKLTLLVLLLIVGSSIVTTKIANKNKQISEQNQYELGVLNNRMEEILAGNLVVKTFNQQAHAEAAIHEVNKKQYNAFKRAQFMNFAIYPAIRFINQLAFIISAVFGAMLVLSGGVTIGFLQAYLQYINQISEPISTASYVINSIQSAMAAIDRIFEILDETDEIPDLPDARLLEQPKGKIAFKNVQFGYTSDKILMNQVDFSVKPKQTVAIVGPTGAGKTTLVN…
273	AMQ97387.1	dacA	hypothetical protein AX771_07610	0.0337	33065	5.5	Membrane	295	MSFQIGELFNLDYWQQMFSGDLFSLNFLVNILDILVVWYLVYKLIQLLRGTKAIQLLKGVAIFIVIRIVAEIIGLHTLSWLMNQVITYGVIAAIVIFQPEIRRGLEHLGRSSLFKQSKSEQQEDEKMILSFDKAIQYMSKRKIGALITIERHTGLDEYIETGIALDADITGELLINIFIPNTPLHDGAVIVKEGKIAVASAYLPLSESMLIPKEFGTRHRAAVGISEVSDAITIVVSEETGDVSITLDNELMAGLSQQEYLAILRRELIAEEKTKNKKNVIQSFLDGMTKGGDRK
275	AMQ96169.1	secY	preprotein translocase subunit SecY	0.0332	47499	9.55	Membrane	431	MFRLLKDAFKVKDIRSKILFTVFVLFVFRLGAHITVPGVNAASLQNLSSLPFFNMLNLVSGSAMQNFSIFSMGVSPYITASIVIQLLQMDIVPRFVEWSKQGEVGRKKLNQATRYLTLVLAFIQSVGITAGFNQYAQLGFVNNPNVATYVTIGLILTAGTMFVTWLGEQITEKGIGNGVSMIIFAGIISRLPESIREIYEDYFINIDPSDIWKSAIFVAILLVAVLLIVTFVTFFQQAERKIPIQYTKRVAGAPTSSYLPLKVNAAGVIPVIFASSFIATPNAVLQALSGRFGSENWYKVMMEIFNYNTAPGATIYTILIVAFTFFYAFVQVNPEKLAENLQKQGSYIPSVRPGKGTEEYVSRLLMRLSTVGAVFLGLVALLPIIAQMVWDLPQSIGLG…
276	AMQ97109.1	mscS	mechanosensitive ion channel protein MscS	0.0332	33844	5.84	Membrane	306	MFSLLATAGTTDSSGETLTDQAVSKVNAFQRFWDGIDWDAILAAFIQKSLYLIFLIVLFWILHRVGKYLIDKSFNQYSKKAILNESRLKTLHSLLNTIFHYTLGFFFIYAILSAIGVPIGSLLAGAGIAGVAIGLGAQGFMSDVITGFFIIMEQQMDVGDYIKLANLTIEGTVVSVGIRTLQLKATDGTVHFIPNRNITTISNLSRANMQVLLDIRIVPEEGYDKIYEIIDRVNRTLAEKYQEELQTEPSIFGLVDLGNSNFAIRTVCYALNGKQYALKEEFLSSYVKELTASGFTIPNSPIAVGK
278	AMQ96672.1	AS238_06395	D-alanyl-lipoteichoic acid biosynthesis protein	0.0326	6082	9.82	Membrane	49	MNKWRSNPKLNYWGKFIIRTIFYSAVLLFLIYLYHYKNIQGGTFIYNEF
279	AMQ97342.1	tcyP	sodium:dicarboxylate symporter	0.032	48688	9.44	Membrane	463	MTTLITVLVVLVFAALLYVFYRMQKRHTKFSTRVFTALGVGIVFGGLLQLIFGVDDKVVTQSMEWIGIVGQGYVSFLQMLVMPLVFISIIGAFTKMKVSEKLGKISATVLTSLLGTTAIAALIGIGSTMLFGLQGAKFTQGAAETARISELATRQETVENLSIPQQILSFIPKNVFADLAGSRATSTIGVVIFAAFVGIAYLGVKRKAPKEAAFFSDLVDSLYKIIMRIVTLVLRLTPYGVFALMTNVLATSDFAAIVNLGKFVVASYVALLAVLIVHSLILIGAKVNPINYFKKAFPVLSFAFTSRSSAGALPLNIETQTKALGVDDATANFSASFGLSIGQNGCAGVYPAMLATIVAPAAGVNVFSLEFILMLVAIVTISSFGVAGVGGGATFASLI…
280	AMQ98151.1	secE	preprotein translocase subunit SecE	0.032	6618	9.78	Membrane	56	MKFLKSVKDEIKQVTWPSRKQLRKDTLVVIETSIIFGLMFYVMDTAIQSLFGWILK
283	AMQ97556.1	AS238_10250	hypothetical protein AX771_08635	0.0315	13390	7.98	Membrane	116	MIFFSIGILFLIIGSLFRILPSKGNLPFYGYHSPLAAKTDAHWRLAQKTSGNWFFLMGLLMALIGYYLKTSGHTNYFLIEMLLLVFPIMPIFIMTEKKLQKYDLETGGNDNEYFND
285	AMQ96807.1	AWT83_14935	hypothetical protein AX771_04155	0.0315	27861	9.21	Membrane	243	MNSSWRFFVVVEALLLLFAVWQIVNNTGLLLLVIFGIFNIYLAMRKYPRTKFQNFQLILGSLVIFFSLVNSPALWMMVVLAVLFIGLKGVEISGIDLTKNAFWRKKQIMMVQTEQLKTHNNERKRQQLFGNQRIGNDVYEWDDINIAIISGDTIIDLGNTLLPKDDNIVIVRKGIGRTRILVPLGVAIRLEHATLVGNVLFEEEQFSLKNEQIKICSSDYDENPRRLKIITNTLVGDVEVIRI
287	AMQ96348.1	AS238_10335	hypothetical protein AX771_01435	0.0309	13684	6.56	Membrane	121	MTTELMQFLLPYFEKLVLGLDIFAICLLVWGVCLSIKDFLKYLFVHTKVQSDRVSENNAIKKMLGGYILLSLEILVSAGIIESIIKPTLQDIFQLAALVVIRTIISYFLNKEIGPVDVQNK
289	AMQ98312.1	pgsA	CDP-diacylglycerol--glycerol-3-phosphate 3-phosphatidyltransferase	0.0309	20859	8.48	Membrane	192	MNLPNKLTVLRICMIPIFILVVGLPLDWGQFNVGDTTLAVTQLVGAVIFALASITDWLDGKIARARGLVTNFGKFADPLADKMLVMTAFIMLVDQGKAPGWVVAIIVCRELAVTGLRLLLVEHGEVMAAAWPGKVKTATQMVAIILLFINNIPFSLIGIPVDQIMLYACLIFTIYSGVDYFIKNSGVFKGSM
292	AMQ97009.1	AS238_12545	ABC transporter substrate-binding protein	0.0298	36990	4.88	Membrane	330	MKKLWLLLPLLLLLSACGTAKETSSKQEIKDLKKVTLVLDYVPNTNHTGIYLAKEKGYYKEAGLNVQIIEPGDNSTSIGLVGADKAQFGVSYQEDVTYAHADGQNIPVKAIATVIKHNTSGFATLSDSNIHSPKDFEGKTYAGWQSPSEEAVLKAVMEKDGGDFSKLTMVGSNGEGPESLGKSSDIQWYFEGWDMIKAKEAGIELNYIPLKELDERLDYYTPVIITNDQLIKSDPELVQSFMDATKKGYQEAIKDPNDSAKLLQKYAKENDRTFLEESQAFLSKNYTDDPENWGLMEEKVWRNYTAFMQENGLIKQDVPSQELFTNQFIK
294	AMQ97262.1	AS238_08300	hypothetical protein AX771_06880	0.0293	6824	9.6	Membrane	62	MKELFSAYKLPIIFGGLGLLLAVLWLTIGFFKTLLIIIMTAIGAGIGFYLKQSGIVDQFFKS
296	AMQ97176.1	AS238_13655	ABC transporter substrate-binding protein	0.0293	37131	4.92	Membrane	349	MKNKRLITVVVIILVYLAGAFIYGKASGEKESTSTNQTKKTTVVGVLQYVSHPALDEIYRGIKDGLKEEGLKEGENLEIKFQNGQADQSKLATMSQQLVQSDPDALIGIATPAAQSLANTTSSIPVVLGAVTDPVGAGLVASLEKPGGNVTGVSDQPPVTSQIKLASDLLPNAKKVGILYASSEDNSKYQVAQAEEAAKKEGLESVKYAVPSTNEIAQTVQVMSRQVDFIYVPLDNTIANAMQTVVKEANKANIPVIPSVDTMVEQGGLATIGINQYQLGLQSGKMAAELASGKEKPETTPVYTFDQGDTVINQSQADRLGIIVPQSMKEKAKIITDDSQQETSKEDDK
297	AMQ97969.1	AS238_08620	hypothetical protein AX771_11090	0.0287	14591	10.76	Membrane	125	MGKLVAVAQSLLDILKWLMEGSNWIFVLPLLLISLFIMFRMVRKKETFLIFIWYAASVGVATLMVELALGSWEACVFALFFAVLYLIIYIPYMKRKSRIGRKGRHTTTFSSTDSLEQSRRTRRRR
298	AMQ96777.1	AS238_09895	hypothetical protein AX771_03970	0.0287	14639	4.76	Membrane	133	MLDIVPSNTHRSGSLINFAAIFACASVILASPVVVDASSTPKTKNDNQLVITTKNEINTISSNDGKIFDVINTVLKRKAEINIKYDEDLNLYFFVIKTTSELFSSDYDVLDTLDNVLSDYKYMGKSVVATLGE
300	AMQ97660.1	ycaM	transporter	0.0282	54070	9.51	Membrane	488	MNNKQLRWFTVALIAFNMVWGMGNVVNNYAQQGVSVVTSWLLILAIYFIPYALIVGQLGSAFKDSKGGVSSWVENTTSNKRLAYYAAWTYWVVHIPYLAQKPQAILIAGGWAVQGNGNIVNTMSVQMVAVISLIIFLAFLYLSTKGLSTLKVIGGLAGTAMFVMSILFILLAVTAPFINPTMEFATPHMNQVKTYIPTFDFSYFTTVSMLVFAVGGAEKISPYVNSTRNPAKEFPKGMIFLAAMVGICAVLGSVAMGMLFASDNIPKDLMANGAYSAFQILGNYYGIGNSLMIIYALTNMIGQISALAFSIDAPLKILLADADPEFVPNWLRKRNRKGTLVNGYLLTGILVGIIILLPIFGIKDMNELVKWLTNLNSVVMPMRYLWVFLAYMMLNKAYK…
303	AMQ97157.1	AS238_02635	hypothetical protein AX771_06290	0.0282	15002	9.66	Membrane	128	MKTTFIRKTGFYGMGSSIQLRINNEKRSVLSHEQKITLDLEVPFTMQVTFYWLKSPVYTVKEAKPAYVITMNYLILQIYPFLFLATGLGAVFLQNLFFSFFAVIVLIAFFFYIKNRAYLIKEENYGKL
307	AMQ96512.1	graS	histidine kinase	0.0276	39343	5.95	Membrane	341	MNFFKYLKDQWTLILGWLFFIALTIFVMWLAPNIKVDLSTIAYLALIEGVFLIFYLLGGYLSKRRWWGKLADIQKTSPLQNYLSGGRTEEEKLVEEYINQLIREHQEVMQSAISNQQDQKDYIDSWVHEIKVPLSASKLLVRSIEFDIDDQKYTLLENELSKIDEYVEQVLYYARLDSFSRDYLIQEYGLKGIIQPVIRSQANYFIQKNIRYEIVGEDHTVLTDAKWIAFIFNQLLSNAIKYTPDHGNIIVSIEKEAQGVSLSVKDSGIGIPAEDLKRIFDKGFTGRNGRLSKTHSTGLGLYLAKNLAEKLGIHLTAESTEGKGTTMTLFFPILNFYNEKR
311	AMQ96478.1	AS238_06850	peptidoglycan-binding protein LysM	0.0265	32392	4.77	Membrane	298	MYDENEWGENVRMTRRRQQKQAARKRMIMIGAAVAVFLIIAGGVAGLYFHGKNSSEAKSTTITETTTKKTETKQTSESSTKTKETQTSEEKTANGLPEQLQAIVNDYSKKIEEKTPALIEEYQTEIQGNQEGIAGLSAVANQKARELQAISDEGIRKLRAAYQAAENKDGVDLDTLINQLSANYTNHVAKISDIYLQTSASLQAESTSTQDTTSSDSETAESVEASEMQARTTQDTTDSSETNTNSATSQAATTVVLEGEGPNQIAERTGVPVETILSLNGMSMENYFLTPGETLKLN
312	AMQ97104.1	glnP	glutamine ABC transporter permease	0.0265	23984	7.82	Membrane	215	MSELIQTYGPIFVDGFKITLFSSVLALVFSLIIGTLMAIFQLSKNKVVSALAKAYVEFFRNIPLLIIVMFFYVVVPIYWFNLDGFQAGTIGLTIYTSAFIAETVRSGIQTVPKGQTEAGLSSGFTYSEIMRYIVLPQAFKIVIPPLGNQFINLVKNSSILAIVAGLDLMYQGDLIASETFNTFDTYIIVGLFYLVITLPLSYLMVYLEKKWAVRS
315	AMQ97764.1	atpC	ATP synthase F0F1 subunit epsilon	0.0265	15551	7.03	Membrane	140	MDQYLTVNVVTPAGLVYDHHAAIVVARTTAGELGILPKHAPIIVPLTIDEVRVKRTDSDTHVDWIAVNGGIMEVRDNVVSIVADSAERERDIDVSRAERAKQRAERQIEEAKAKQDTNELKRATVALHRAINRIKVSKHS
317	AMQ98153.1	AS238_09285	hypothetical protein AX771_12180	0.026	24168	7.71	Membrane	214	MLLKTLVYKKKDLTTVTETSTLEEALKILETSGYRCVPILDSSGNIFRGNIYKMHIYRHKANGGDMTLPVTHLLKNATKFIYLDTSFFKVFFTIKELPYIAVLDSENHFYGILTHSTLLNMLSQSWSVEQGSYVLTIASTGKQGDLAAIAKIISKHSSIASCITLDIEKDEYIRRTLITLPANTEAKVCETIVNHLEKKNYKVVEIENLQNQEA
319	AMQ98273.1	A5836_000540	septum formation initiator	0.0254	16257	7.93	Membrane	141	MTKKSNKIAALDTEYAKKKYAEFQQQQRQLIFRRRRLAAIFVGALVIFAIIGVQIFHDMQRMHQLNELRVEANTEMKEVNADVDQLHQDVSLLKDDEYVAKLARSKFFYSKDGEKVYPILESNTDSSTNETDQSTSSTTAK
320	AMQ96810.1	ktrA	potassium transporter Trk	0.0254	24720	5.08	Membrane	221	MKQNFAIVGLGRFGGSICRTLIEAGQEVLAIDSNEDRVNEYMNIATHAVVANAQDEMTLRSLGIRNFDHVIVAIGEDIQASILVTLMVKEMGVPNILAKAQNEYHARVLEKIGADRVVHPERDMGIRIAHNLVSKNILDYLELSDKYSLAEIRVSNPKFFNKTLAELNFRQRFDLTVVAIRRVDQTVIASPAADEYVRENDNLLVIGETGDVDILDDKMNQ
324	AMQ98326.1	A5814_002601	hypothetical protein AX771_13340	0.0249	42554	6.94	Membrane	385	MQKRVITLLMIIVGASLGISFLPSAWQAIGQQSNGWLNNTFTNSLLGALIFFLLSLLLAKHISAIIKQVEQKLSEVSLTYLLFGAIGAIIGLTLGVVISTPLYNMEIPFVNSVLPILLMIILGYLGLRMGTTRIEEWKKVFGSRSKKIEQETASQVESQLLERKSGENFHKYKILDTSVIIDGRIYDITKTGFLEGTLMIPNFVLYELQYIADSGDSLKRVRGRRGLDILNALQKEEGISVEMYDGDFEDISEVDSKLIKLAKLLDGVIVTNDYNLNKVSEFQNVPVLNINALANAVKPVVIPGETMNVLVVKAGTERQQGVAYLDDGTMVVVEDGQHYMNERIEVVVTSALQTAAGRMIFAKPAHAGRGIDNKKETEKKTKQSK
326	AMQ97216.1	AWT83_12475	cation transporter	0.0249	34040	5.93	Membrane	311	MENFKKSGMFSVIAALGANILVAISKFVGYAISGSAAMLNESIHSIVDCSNQILLLFGDKQANKGQSELHQFGEGRAKYFFSTIVAMMLFFGGGALGVMEAFEKLTHPSHEVGNPIIVIAILLFGLVIEGSSLRVAMKEIKELNTEKLSTMRFLRESRHSEILIIFTEDLCAVIGLVLALAGTILTYATGIAAFDAISGLLIGFLLMGAAIFLAKEFYSLIIGESVTASDLSKIKLAFERPEISRLIDIKTVHLSPTEILVAAKADIVGNKENEAYSVINDIEKNMRQSLPDKKMYIYIETDKYDPNYSRK
329	AMQ96799.1	wcaJ	UDP-phosphate galactose phosphotransferase	0.0238	53335	9.31	Membrane	463	MNKNGEWNAARRIFIILMDVLVLNVSIYLSFLLKFQGEVPVRNLETFQHSAIFISIIFIALNILLGAYVFYNRMISDIVFITVIGQVLIALGIMVVTFAGRWFAFPRGVILISFILGTILLSVYRIVVYKLYLRVSRDKKVLIVGLEKDVAPAIQNFQSKKNNKHKVEAVAIDNYYENTKKLIDDMDIVYLASKIPEDEKINIYQLVTKKEKKLFLNTTFENLTMINPNIMNFEDESIIEASGFRIQPEYELFKRLFDIIVSLILLILASPFMLITAILVKTTSPGPIIYKQVRITKNQKEFSIYKFRSMSATAEAKSGPVLAKSNDARVTPVGKFIRAVRFDELPQIFNVLKGDMSIVGPRPERPFFVDQFNEENPYYYLRHNVRAGITGYAQVYGKY…
332	AMQ96587.1	AS238_10220	DUF305 domain-containing protein	0.0238	17089	9.43	Membrane	147	MKKYWKFLLMIGVSTVVMFGMMYLNVYALDHIFFSRTRVFMALMMGAVMAVIMLLFMWKMYENKKINVMILAASLLVFAGSLFMVRSQTTVNDTAWMKAMIPHHSIAILASKRADLKDPEVKKLAEEIIQAQEEEIDKMKKMIKEME
333	AMQ98641.1	CUM68_08355	hypothetical protein AX771_14730 (plasmid)	0.0232	17644	9.26	Membrane	154	MKKLIIVVTSLIAMIVILVGCSNEKNKQTNQDNGVLKSGTMWKEEVGGLVYNLKIIDETTWEYSESVWHPDPVQITVKRQKDYKGLERYKIVDSASVREFINKSDSLFIVVPYEKNGVKKIIFLGSSKDEKRTKEKLIHDGSQSNKYKLQKTSE
336	AMQ96689.1	manY	PTS mannose/fructose/sorbose transporter subunit IIC	0.0227	27238	4.58	Membrane	267	MSIISIILVVLVAFLAGMEGILDEFQFHQPLVACTLIGLVTGNLEAGIVLGGTLQMIALGWANIGAAVAPDAALASVASAIILVLGGQGVKGVPSAIAIAVPLAVAGLFLTMIVRTIAVPIVHLMDAAAEEGNIRKVEMWHIIAVCLQGVRIAVPAAALLFIPAQTVQSFLESMPAWLTDGMAIGGGMVVAVGYALVINMMATKEVWPFFVIGFVVAAISQLTLIALGALGVALALIYLNLSKMGGSSNNGGGSNSGDPLGDILNDY
339	AMQ96438.1	AS238_04660	permease	0.0215	67911	9.3	Membrane	600	MLWKLSLTGIKSRLRDYLVLFSGLVMASAIFYMFESMASNEAFLKSNTIVAATVIIFRFGSVLLGIITFVYILYANSFLMTMRQKDYAMFMMLGAKGRKIAQMIFSETFLVGIAATLVGSAVGVGLTSIVHRLLVDQLDLNISHFTPFSIHGLLITVLFFAVLFLLAAVVNAFSIVKKPILALIRADQTPTRIKQHKFLFFLEVVLGIAFLGCGYYMMKHVGTYQVFGIGVALVTIVLGTYFIFHSVIIFFLSLLKKSEQISLKKLNNFTLSQLNFRIREYTQMLSMVAMLFALALGALTVGLGFKNEIADLTENNSGYDLVMNNPRAEDQQKIKELSPTLSASYTQKEDAGTIYYNASEFAAQPLIMIKHEDGTPPKITKEKVPAKKMNELTVQEELR…
341	AMQ97804.1	ntpC	ATPase V	0.0215	38603	4.75	Membrane	328	MEYHELNPLIRGRELELLSNETFERMIQTNSVEALGEILKSTIYSPYIYDGYEYDFEQNLLKEQSRLFRWLKESAPEPEIVWIYTMRYTFHNLKVLTKAEMTNQNLDHLYIDDGFYSLETLKDAIHTQVSNELPESIMDSIREVRDYFEESTILQGIDVIYDRQFLTEQRRLADKLGYQELLTEVIAFIDLTNITTMARGILQKRTYGFMTTVLSSSGSIEKEVFLNFVDKDMEDYTNFLLETDYADFLRPVIREGNLDLVKLEQLKDDYLSSLYQEAQTQAFGPLPLLAFLNAKEVESKNLRLLVIGKRSHFEPETIRKRVRQVYDA
348	AMQ96433.1	AS238_04685	hypothetical protein AX771_01915	0.0204	30204	4.92	Membrane	276	MRLKHFLITGIGLMLTGGLLAGATYTLGAQKSLTWDNGPRLIDMVTETKKIKDANKIVIHAENQTVSVIRGLDFEIKTTYDKTEKPEIKEKNGVLTVNAVKKSTGAIISLEDTSAQITIVVPADHELSELTIEGNNSAIDINEVSIKKVNTKTHDGWVSFNEFTGGTITAKDELGSLRLDEANVDNLIVTGENSNFHLEDSLISKEGKVILNGGNLSLHEMENSGYTIQTSGESYIEKDYQPITNTLLEQGQKKLKITAKDTSINITTDQEDNETD
353	AMQ98449.1	yidC	hypothetical protein AX771_14135	0.0199	30926	10	Membrane	272	MKKYKRLLLMAGIVSLVIVLSGCGTGEVSAQSTGIWDRYIVYYFAEAIKALSFGNAGIGIILFTLIIRVILLPLMHFQTKSMRKTQELQPKLKALQQQYSSRDPETQSKLREEQQRLYAENGVNPYAGCLPLLVQMPILMALWQSISRVPELKQGHFLWLNLGNADPTFILPILAAIFTFASTYLSSMSQIESNASMKIMNFVMPVMILVMGVNLASGLSLYWVVSNAFQVVQTLLINNPFKIRKEREEEARRIRERERALKKAMNPKKKRK
356	AMQ96794.1	tagG	teichoic acid ABC transporter permease	0.0193	31399	9.19	Membrane	268	MFKDLYLFMKDIYQNRKLLLQFSINDFKSRYAGSFLGILWAFINPLFTVLIYWLVFGVGLKAQMIDAKYPFIVYLVTGMIPWFFFSDAFASTTVVFREYTYLVKKVVFNIRILPTTKILSNLYTHLFFILIGIAVALINGIYPSAMSLQLIYYLFCMCAFLTGLTWLTASIQPFLPDIMQLITIVLQLIMWTLPILWSPNQFDSGLVSILKLNPLYYVVQGYRESFLSEAWFWEHGTYTLYFWVFTLVMFVIGSAVFRRLKPHFSDVL
360	AMQ97744.1	pstC	phosphate ABC transporter permease	0.0188	32784	10	Membrane	306	MEDVKKVLLTKSKRSKMEQRGKLISFLCIALIVLVVLSIFYFVASKGLATFFTDKINVFDFLFGTDWNPSQIGANGKPMVGALPMITGSFIVTFLSAIVATPFAIGAAVFMTEISPKNGTKILQPVIELLVGIPSVVYGFIGLSVIVPFVRSIFGGTGFGILAGTFVLFVMILPTVTTMTVDALKAVPRHYREASLALGATRWQTIYKVVLRAAVPGILTAVVFGMARAFGEALAIQMVIGNAALMPTGLTTPASTLTSILTMGIGNTIMGTVENNVLWSLALILLLMSLFFNIVIRMIGKKGELK
361	AMQ96178.1	ecfA	energy-coupling factor transporter ATPase	0.0188	32389	4.79	Membrane	289	MDIRFEQVDFTYQPNTPFEQRALFDINMTIKENSYTALVGHTGSGKSTLLQHLNALVKPTSGTVHIGERDIQPDTDNKNLKPIRKKVGIVFQFPEAQLFEETVAKDIAFGPKNFGVSEEEALVLAKETLEQVGLDESYLERSPFELSGGQMRRVAIAGVLAMRPEVLVLDEPTAGLDPQGRKEMMEMFWRLHKEQQITIVLVTHLMDDVANFADYVYVLEKGRIVNSGEPQEVFQNIEWLKEKQLGVPTATEFAEELMAKGMNFATLPLTAEELADAIVHYAGGNAHDE
367	AMQ97025.1	AS238_11955	hypothetical protein AX771_05490	0.0177	22390	9.06	Membrane	200	MQFGRFRLGMRTIKSALAVFLCILFFHLTQRGIPMIAALSAVFSLRQDLTTTVSFGKSRIIGNTLGGTLAIIYFFVKSYFHNDFLVELILLPILVIIVIVVSDGINNNSGIISAIATLLLIALSIPQGESALYAIQRVLDTFIGTFIAIGINFFLRPPETEKKEELSEDLVELQKKERLLRTNLQEIEAKIQKQKKNSED
368	AMQ96624.1	AS238_12030	hypothetical protein AX771_03055	0.0177	22619	10.06	Membrane	210	MKNTKNFTLTAMFLAILILLAVTPLGFIPIGPINATTMHIPVIIASIVLGPRLGAFLGGTFGLISMIRSTVIQTPLSFVFSPFIPVIGTEHGSWKALLIAFIPRILIGVVPYFVYKGLRKLMKQKADSVSLFLAGLSGSLTNTILVMNMIYFLFQQDYAKVIGTNLNAVYSAILAVIFTSGIPEGIVAGLATAAVCNVLLRYFKHPSLTN
371	AMQ98688.1	HMPREF1359_02139	cadmium resistance protein CadD (plasmid)	0.0177	22524	4.86	Membrane	203	MLQNILSALAVYISTSIDYLFILLIIFSQNHTKKGLRQIFFGQYLGTGILVAISLFAAYVLNFIPQDWIIGLLGLIPIYLGIRVAFVGEEEEEEGEVVEKLGSRGTNRLFWTVSLITIASGGDNLGIYIPFFTSLSFSEIVTSLIVFAISVAVLCYISYKFAKISFVSETLEKYERIIVPIVFIGLGIFIMIENGTIQTILGL
372	AMQ96836.1	AS238_03670	1,2-diacylglycerol 3-glucosyltransferase	0.0177	46524	5.61	Membrane	407	MKIGFFTDTYFPQVSGVATSIKTLKQELERHGHEVYIFTTTDPNADKLEKDVIRMPSVPFISFKDRRVVVRGMWYAYLVAKELELDLIHTHTEFGAGILGKMVAKKLKIPLIHTYHTMYEDYLHYIGKGKVIRQSHVKYLSRLFANHTTGVVCPSERVIDTLRSYGVIAPLRVIPTGIDIEKFKRSDITQQDISKLRESLGLQENHLMILSLSRISYEKNIQALINGFPQVISAYPNARLVIVGKGPYVEELEELISELQLEEFVQFTGEVDNNDVALYYKAADYFVSASTSETQGLTYTEAMAAGTPCVVEGNAYLNRLFDHPSLGKTFETDEDFAPALIDYISSEVPKDPKVLEAKLYDISSTHFGEAMIEFYQDMVVYHEEEMRRKEEEDSIERIK…
377	AMQ97697.1	EFM1CSP_09995	UDP-galactose phosphate transferase	0.0166	23804	9.68	Membrane	205	MRKKTFYQLFGKRILDILLSGIALIVLSPIILIVGFLVRIKLGSPIIFKQERPGKSEKIFSMYKFRTMTDERDHNGEYLPDEIRLTKFGKMLRATSLDELPELWNILKGDMSIVGPRPLLVEYLPLYSEKQRKRHNVRPGLTGLAQVNGRNAISWEEKFDLDVYYVDKISFFNDLIIIIQTCKKVIKKENINTINNNIPEKFKGS
381	AMQ96331.1	B1P95_10225	hypothetical protein AX771_01320	0.0166	23642	9.12	Membrane	211	MDFLRKFGFFFLLLGVLSDFLTPYVLGLYYPELDQMKSVISVFGEVSSPVRKAFLIWSVVSGIFFILSLPALYAAFVSTSRVLATLVTAAIAFYGIGDCIFTGLFSINTHESSWNVSTWVHNIGSGLGYSGFLLFPVLLFLIYRKNGQMDVSHLYLGLSVISLLFAAIYGLARIPSINSWPLLNKIGFCQRISFFFNYVPIAWLSILHLKQ
382	AMQ96307.1	AS238_02015	glycosyl transferase	0.0166	36319	5.77	Membrane	315	MEQQEKIAVLIPCYNEEATISTVIADFKRELPEADIYVYDNNSTDRTYELAVQGGAIVKKEPRQGKGNVIRQMFFDIDADYYLMVDGDDTYPAEAVHGLLEKLRSGEADMVIGDRLSNGTYFDENKRPFHDFGNNLVRNTITRMYKTKILDVMTGYRGFNRIFVKSFPIMSSGFQIETELTIHALDKKFKFVEIPIDYRDRPEGSESKLNTFSDGFKVIMMIIKMFKDYKPLLFFGIWTIFFFLFGLVTGIPVIREYMLTSFITRIPSAILSTGLMTLALLSLVTGLILDTVVTNAKKEYELNLYHVYHEYHSRK
384	AMQ98115.1	AS238_09735	CAAX protease	0.0166	24193	9.35	Membrane	220	MSLKKYSFLSIFCYGLIFISPLILASIGLVKSTSELITATAVMYILGAVVLAIFYFKQREPLAIESAVKKASAPKIVIYGLVGIFVALILQSIAVMLESVLFGKATPSENTQNIIQMIMEAPAFILATTVAGPIMEEFVFRRSILGIISRYSNFWVGAVISSLLFAFAHNDGHLLIYFFLGFFFSLEYKATGRIWTSMITHVGMNTLVVLVQLAVQKGLV
385	AMQ97777.1	AS238_07000	alpha/beta hydrolase	0.0166	36652	8.58	Membrane	322	MVIFYFILILIIIGISYHFLSYFYAKKLVRAGVQRGYDWYEDTGHRLMDPAAVTSVEKKRQKLEEECESFWEQGTPKTIKSYDGLKLAGQMFIHPNKQNKWVICVHDYRSTGKRDMSHIGKRYAEKGFNVLVPDLRAHGESEGEIIGMGWLDRLDLIAWIQLILDEQPNASIILHGGSMGASTIMMASGEKLPSAVKGFILDSGYVSVYAEFRYMLSKITVFPKKMVMRYANHYAQKYAGYSLKQASATRQLGSNHLPLLVIHGERDHFVPTEAAYTIQNATAGDKALLLVPEAEHLEASMKDPKTYWTVIFSFIEQRITMN
388	AMQ96540.1	A5810_002709	methionine ABC transporter permease	0.016	24685	8.8	Membrane	228	MDKSFSETYLDFKQINPETMNQAILDTLYMTLISMVLVTIIGLVLGLILYSIGRKNKPYARIIYGIVSIISNIFRSTPFMILMVLIIPFTKAIVGTMLGAQAAIPALVLSAAPFYARLVEIAFREVSPGVLEAADAMGASYWEIIWKVLIPESIPALISGLTVTTISMIGFTAMAGAIGAGGLGGLAWQEGYQRGNLTVTFVATLIILLIVFIVQGIGDFLTKKTDKR
390	AMQ96601.1	AS238_12995	hypothetical protein AX771_02925	0.016	24499	9.1	Membrane	228	MENYLSLLGVLIVILGFAFKLDSILIVMVALVVTALTGGLGIQGMLELLGTSFVNNRGMAIFIIIMLATGTLERNGLKESAASLIKRFKKVSAGMIVDIYGIFRMIFAAFNVSFGGVAGFVRPIILPMALGTIESKGLEVHPKHEEELKGMASAMENVCWFFGQVLFIGGAGALLVQSTLKDLGYDVTLGQLALVEVPVAITALVVASVYFYLKEKKLAKKYYPGKGQ
391	AMQ98487.1	AS238_06215	ATPase	0.016	88277	5.73	Membrane	797	MFLILEHARLKHVIIFESWRKMEKKKMNGLTQQEVVQKMASGQQNDYQEDASKSTKQIFSDNILTLFNFLNFGIGICLLFVGAYSNMAYLAIIVVNIVIGIYQEIHARNLVRKLSIVSQSEVLVIRDGKEQSISTKELVLGDLVKIGAGEQIPADLQVISGRAEANEALLTGESDLIVKETGAELLSGSFLTSGSVMAEVIRVGADNYAVRLTSEAKTHKAIRSELVDSIRKVSKFTSFVIIPLGIILFLEALFIRDASIKISVIASAAALLGMLPKGLVLLISIALTTGVTKLAKKRILVQDMYSIETLAHVDTLCLDKTGTITEGKMSIQRVEALHPLYEKAIPEIMGTYLAESSDNNITMRAMRDYFELSNRYDVTNKVAFSSDRKWGAMEFPELG…
392	AMQ98646.1	HMPREF1359_00224	sortase (plasmid)	0.0155	25207	6.33	Membrane	223	MKKWLFGFLGVALIVFCSVFGYVSYQKHEGEVFKQNIEKKMPIDQINEHAKSYKEDATNVNNDMSLGQMLSIQKEAIEMGVNKQAFAQIQIPALGLTLPIFKGANQYTLSLGAATYFYEDAEMRKGNYVLAGHNMEIPGVLFSDIQKLSLGEVMDLVSNDGVYRYKVTRKFIVPEYFKLIDGVPEENSFLSLPKKGEKPLLTLFTCVYTSQGKERYVVQGELQ
393	AMQ98261.1	bcrC	phospholipid phosphatase	0.0155	25298	9.94	Membrane	218	MKYKTSFQVAGSFFLVLFFILGWIVKFHLSWLSGFDQWFTGIVRASYPDLNSYQLFMTKFGNPLTVIILFACAALWMWYKKKRAETFWFVSGFIVIAGIINPVIKLFFMRERPSLAHLVVETSYSFPSGHAAGSMILYGSLLFLLPAFVQKRTLRTLLQLLMMFIIVSVGISRIYLGVHFPTDIIGGYLLSLSWLCLTYPVYREKRKQIDNSYRKKDF
396	AMQ96308.1	AS238_02020	peptidase	0.0149	12806	6.14	Membrane	116	MYEESELSYFKGGLAVGIGLGLLSGVASTIWYHRKKVLSADQVLENIKSSFLKEGAIEGSWISFEKEPIRKFAVRSSAYRGGLSRIEDGETVYYEFLADAHTGTVLEISRKKGATD
399	AS238_05960	AS238_05960	hypothetical protein AX771_03620	0.0149	12712	5.04	Membrane	109	MIYFLGSLITVLSSFIYLKKKKQAEKSEGLSKYQGTWFFSDSQQKQQLQITSDYTFLINGQSLGTSVVEIDEYRLVVRDQYGFYLIFSYPEQTLYDESADTSYKLLSEK
400	AS238_04515	AS238_04515	ABC transporter substrate-binding protein (plasmid)	0.0149	40143	4.38	Membrane	366	MKMNEKIRNMTIGLFCAATVSILLTGCGSGEATKQSAAADDSLDTIIEKAKEEGEIASLGMPDTWANWVGTWNDLEKEYGLSHVDTDMSSAEELAKFESEGKNGTADIGDVGISFGPLAESKELTLPYKTNYWEEIPDWAKDDDGDWLLSYTGTISFITDKENVKQAPTSWKELQEGDYQVSVGDVTIANQAQFAVLAAAIANGGDEKDIQPGLNYYKKMAEKGRLSTVDASVANLEKGEIDVAVVWDFNGLNYRDQIDSERFEVTVPTDGSIISGYTTLINKNAPHPNAAKLAREYILSDEGQINLAKGYARPIRKVELPKEVAEKLLPEDAYEAAVPVEDNEAWNKTSVELPELWQAEVLTYAK
401	AS238_13420	AS238_13420	oxidoreductase	0.0144	40831	5.73	Membrane	370	MEKIAIIGGGIIGMTLASYLDTSKFNVALFDEGTGQATKASAGIISPWLSKRRNKQWYRLAKDGAAFFPKLIKDFQLDQTIYAQSGTLLLRPEKDLAELAVLAEKRKEEAPEIGNIEWLSPEQTSQALPLLKPAVSLRISGGGRLDGKAYLEHLGQRLAQKQMEQIQAKVTLHKKSDSWLIKGPFGEYTADRVILTPGPALKPLLQELGYAADIRPQKGQLLAFQTSYKMSQDWPVAMLDGEADFIPFMDGKILLGATHENDQGWDLAPTSEAYKGLTKSTEQFLTDPDQIKNWPYEFRVGTRAYTSDFSPFFGVLPDDPSLLAASGLGSSGLTTGPYIGYLLANFLNTGHWPTEDYQKDISTYITKNPS
409	AMQ98515.1	mdoB	phosphoglycerol transferase	0.0138	71589	4.88	Membrane	630	MMVIYFLLTLLVFSNVTYYREFTDFITINTILGAGKVASGLGESAIRLFRPYDVIYWIDFIILTVLLIAKKIKLDPRPIRARMAFAISTLAVMIFSGNLFMAEADRPELLTRTFSRDYLVKYLGLNAFMVYDGVQTYQTNQVRAEASPNDMKEVENYVKEHYAAPNDDLFGLARGKNVIYIHLESFQQFLIDYKLTDENGLQHEVTPFINSLYHSNSTFSFDNFFHQVKAGKTSDAETLMENSLFGLNQGSLFTQLGGKNTFQAAPDILSQTQGYTSAVFHGNAGTFWNRNETYKNLGYDYFFDSSYYDVNDDNSFQYGLHDKPFFQQSVQYLERLQQPFYSKFIAVSNHYPYSKFTNDEAGFPLANTNDETINGYFATANYLDTAVQEFFNYLKESGL…
413	AMQ96654.1	A5810_000365	hypothetical protein AX771_03235	0.0138	13582	6.71	Membrane	121	MKHVKALVVKAIMIWAILWVVLTGLYGVSFMDSTIVGVIIVVMIYVLGDLLILRKVGNIAATIADAGSAAVILWLYLYFMNDTVDIWMKVLIPALLIGVAEWFFHKWLLSQGIVPDERKME
414	AMQ97064.1	ftsW	cell division protein FtsW	0.0138	42535	9.59	Membrane	387	MPKKVKKRHLLDYSILIPYLILCVLGLIMVYSSTSYLLLENGQNPSASVINQSIFWVLSLIAIALLYKMKTDVLKNQRLIMAAIAVLTILLLIVVFFGKEINGAKGWLQIAGFSIQPAEYLKIISIWYLSLTLSKRQNSVQKDFLGTVKRPLAMVIGLTALVAILPDFGNAAVIFLIILVLLLASGVNYVYTLIVGVGGFCLSTFTIWLINITNGKILPGRLQYIYNRFAIYQNPFSDELNKGHQLVNGYYAMFNGGLFGRGLGNSIQKKGFLQEAQTDFIYAIVVEELGVIMGILILALLFFMIVRIVLVGIRSKDPFNSLLCIGIGAMFLIQVFVNLGGITGVIPLTGITFPFLSQGGSSLLMLSICVGFVLNISADEKRKSLGL
416	AMQ96536.1	ftsW	rod shape-determining protein RodA	0.0133	43703	9.24	Membrane	395	MEKKLKASNDNRIDYGVILPVFLLCLIGLLSLYVALSHDPNNPAVLKGVGMQVVWYLVGAAAIVVIMHLNSKWIWKLTPYLYGLGLVVMGLLLKFYDQNLAASTGSKNWFRFGAFTFQPAELMKIAYILMMALIVTKHNTQVKERTMKSDFWLIGKLLIVTIPVLALIMAQDDFGTMLVFLAIFGGIFLMSGISWRIIAPVVILAVVVGAGTIFLVTTEGGRDLLYKVGFKSYQFARIDSWLDPFHDTSGMSYQPAQGLLAIGTGGLFGKGFNVSNIYVPVRESDMIFTVIGENFGFIGGAFVIFLYFILIYRMIRVCFDTNNEFYAYIASGLIMMLLFHVFENIGANIGLLPLTGIPLPFISQGGSSILGNMIGIGLILSMRYQNEAPARSSRR
418	AMQ97622.1	AS238_12680	hypothetical protein AX771_09030	0.0133	29191	5	Membrane	263	MRKKMLFIPFALLLSACSSVTQESDNTHLSSSISETVTSPEKSSTKTASTTEQTMATSNNEKKTALDQLKEQQPNVPMPLDVPVSSGYLNIAATHTKQGYSILYYRTDRPLGLNADELNQETPIATYLYQYGFASSQETIQVLQPFEIDTNGQQVDLGSRITGYQQGAAGSSFLEWQEGNWRIRIRGNNIEGQDPLLLAKEIVAYLEENSLPAPEQFGKITVDMGDTTNRAVEVSWQEPKNAYTITHQDPMSALKMAVSMKRL
419	AMQ97547.1	AS238_14610	hypothetical protein AX771_08570	0.0133	14132	7.79	Membrane	128	MKKILGLIVIILIAFIGWKGWDYYQSTYVGKDYYAVVKAPMPAETDIKADNGEVIGRGFKYNVDAYAENGEKRQLDFDVITSGDSANGSAYPEGTILQLKASEKRIIEKKVITSDKVPSSVKEKLGLS
422	AMQ97429.1	cdsA	CDP-diglyceride synthetase	0.0133	29171	6.51	Membrane	266	MKQRVVTAAVALVLFIPIIWIGGIAVELTAAILAVIGVYELFRMKGLTLLSFEGVLSAVGAVLLVLPKERWFFFLPENVSTFMLFYLIVMILLGTSVISKNTYTIDEAGFPVLVSLYVGIGFQNFVNARTESLAVLIFGLFIVWATDIGAYMVGRRYGQHKLSPDISPNKTIEGALGGIGSAVVVAFLYLLLYPAKELFNHGMFVMLLMTIIFSAVGQFGDLVESAIKRHYDVKDSGNILPGHGGILDRFDSLLFVFPIMHLFGII
425	AMQ96205.1	lrgA	murein hydrolase transporter LrgA	0.0127	14940	4.72	Membrane	136	MKFFQEFFIIIFFSVLGEGIRIFAHLPIPGSILGILFLFLAFEMHLVDPEKIGATGDFLLNNLAILFVPAGVGLLEYFDDIASIWPVLLGAVVVCSIVTMVAAGKTAEGVEALLGYVRKKKAERVSVNEMEENQID
427	AMQ96816.1	AS238_10065	hypothetical protein AX771_04200	0.0127	30146	9.38	Membrane	267	MTTKQLIISSFIRFKDLKEARNVPFWKAIVYLLVLSIIMALPISFQVFQVLNNIQLDGQKIATRIPDFTIQNGQLQTEEKEGFIYQTNSIIFTFDPEGKRTEQDISTDLMGNFVSVGMLKNKLIIALPNTGTTSALLNNNQLELPYTNESLKNLTGKQLRSFLSEASIPLWIKVLTFIFSIYPSFLNLLITLLFTNIAAFLYARFRLTKATFLDCLKTLIYSISLPTIIATILMVFLPSFDTSAFIAFAGIFIFAQAVKGWAKISIN
428	AMQ96675.1	AS238_14825	hypothetical protein AX771_03370	0.0127	30490	6.58	Membrane	267	MNNRIPISEYRKKARVSLENQWGINTWLVFLSIIFTSVIQNFFDGFSPFPEESMQQHLLSFLVDNLLLFAFNYALFYIALVVVRGGRPKSNLLFSVFQRKYFGSILGINLINSVINWLLNSLIFLPMFLISGVSTYMQLLFSSNAVPTGVMPEDFLDISFVLSMIGMIFVSALIMSIVGGLFQFAAWTKFDYPDLSVIQCLKYGWFLLKDRIGTYILLQLSFIGWYLLGAIALFIGLLWVIVYVNVSVAEFYEQARIEKGGPDAYFT
430	AMQ96179.1	ecfT	cobalt ABC transporter ATP-binding protein	0.0127	30420	9.64	Membrane	265	MMNKLIFGRYMPGDSLIHRLDPRAKLLASFYFIGIIFLANNWETYLLLAFFTLLSVFLSKVDLKFFIRGIRPLIWLILFTVALQVLFTSGGETYWSWGVFHITEFGVMNGLFIFCRFVLIIFMSTLLTLTTPPLELSDAIEYLLRPLKAVRFPVHEISLMLSIALRFVPTLMDETEKIMNAQRARGVDFGEGNLVQKMKAVIPLLIPLFVSSFNRAEDLATAMEARGYKGGEGRTKYRVLHWHNRDTMVIIAFVLLTVLLIFLRG
431	AMQ96707.1	ftsQ	cell division protein FtsQ	0.0127	46031	4.99	Membrane	406	MSKKKEPKKLSHPSSDENNLTPWQKANRKYLAEQEMKNQEPKKEDITLDTPLSDSEEEKTVQEEQQEESQSEKKIEFFEEIKQKKNGGPYNGSFLNRLPNLKSQRHKVLFRRLALIITVLGIPLIFLIYYVSPYSKLQAVAVSGNKTVNSQEIISDTKLSLGENVWGQYFHRSTYIDRLKKAQPRIETANIHFKGMNEFDLDVTEYKEIALIAKNNQYYPVIENGTVLDEKVANPTKNLPILEEFKDSAKIKELTKQYNQLSSELQKAISEIKYTPRASNKNLIQLNMNDGNQVIVNINNLANQMKYYSQVAKDMDEKGVIDMEVGIFSHPYGSTQETEESGQSEETTESEENADQTNESSEEAETQKAQTPGSSSTNGSSDSNDSSETSQIEDNPSTT…
432	AMQ98480.1	ftsL	cell division protein	0.0127	15015	5.03	Membrane	133	MAELKKMQDYEYDLPELVDQPEQQMPDSSSNQEIILPQSPAKRLKQISALEKIAVASVAIAIVALCVLTVMLRTNISGAEKEITSIQTEINDKKQEKTSLEQEKNELSRTERIKQIAEEKGLSINDDNLRKVK
434	AMQ96264.1	HMPREF1359_01778	phage infection protein	0.0122	98970	4.78	Membrane	901	MQSIKNTLRLYLLDWKRIFKNPIATLLIIAIMIIPSLYAWFNIKALWDPYGNTGELPIAVYSADKPAEFQGKEVAIGEQVIESLHKNKQLGWQFVDSKEQLEDGVRSGKYYAGIYLPKDFSEDLLSFTSGDIKKPKIEYTVNEKINAIAPKITDKGASSIQSQITNEFIKTASSTLLKVFNEIGYDIDTNLVSINKVKDMILSTDENLDTIDGYTKQVLELQSQLPEIKEKLNKANEFVDYIPKVDEMGEKVVALNDKMPELKDQAKIILDLQEKIPEIQNAGKQLAEIDGDFASIQETMNQGIDEAKQGLTIIQQVQDILPDVKNLENQASDLANQTKSGASQLKDAIPSITNSVDVTLKSIGQVATTTGSLIDTVRTAIEVGKLTDDEKKNISNVLN…
436	AMQ97325.1	AS238_02810	hypothetical protein AX771_07255	0.0122	15508	4.26	Membrane	146	MRAIFSSISVVGLFFLLAGCGSADSNTGSVDSIDAGQTVKTSSTKTERQSIFVGTIESITQVEAEEETLQLKLVDVMAKEDPANMGTSFSNDGVILNATAEKISVDINELKIGDKVQFTLVEMPIMTMSIPPQVPGDSIIDVSLNK
437	AMQ96793.1	HMPREF1359_03109	hypothetical protein AX771_04055	0.0122	48513	5.62	Membrane	426	MKIIQAIVQKFVNKMSVGFLLLLLTLVFFVWTAGVGFPATLFIYNNSSLLIAFSVAILLILNVYKAKGVDFLYLGVALALFIFFSYFRELRNESLFGDLLFPLIILFCLVIKWIEWTKWDRGIYLIVFTVFLGITLYRVFTEIQVPEGQSIWAPGNSLSDIWINTNTIGSSLMTLALLISGFASSFERWYVRIIGGIAVVAAFLGIWVCQSRGALVALIVFAILDLLPKSLMRVIRAPFIAYTVTILLALPISYLAAVSEKVNLFTGREDIWHKFYQTLGEKSEQVLLGMKTFIFQRGNQFLGNHNSYNSILNIYGLIGFGIAALLLILFIGRLTLKADLSNGQMTFIWAFFAVMMQSFMEDTLTSYPWVPIIYILLAMAVHRYDEPEVTEEFYVMEEA…
440	AMQ96177.1	ecfA	energy-coupling factor transporter ATPase	0.0122	31143	4.75	Membrane	279	MEPIIELEKINYKYQPDDLRPALKDVSFTIDKGEWIAIIGHNGSGKSTLAKTINGLLLPESGIVKVGNQILDEENIWTIRQMVGMVFQNPDNQFVGSTVEDDVAFGLENQGIPREEMLVRVKDALEKVRMAEFASREPARLSGGQKQRVAIAGVVALRPDIIILDEATSMLDPEGREEVISTIKKIKEESQLTVISITHDIDEAANANRILVMRQGELVREGTPKEIFSAGPELIDLGLDLPFPEKLKSALKERGVDVPSEYMTEERMVDWLWTSVLNK
441	AMQ96708.1	ftsA	cell division protein FtsA	0.0122	47988	4.52	Membrane	441	MAKTEMYVGLDIGTTSVKVVVAEYIDSQMNIIGVGNAKSEGINRGIIVDIDKTVQAIQRAVRQAEEKAGIQIKGVSVGLPANMLEVENCQGMIAVNGDSKEITDEDVRNVASAALVRSIPPERQIVSILPQDFTVDGFEGIKDPRGMIGVRLEMYGLLFTGPKTIIHNIRKCVENAGLIVNEMVITPLALTESILSDGEKDFGTIVIDMGGGQTTTAVMHDKQLKFTNLDQEGGEFVTKDISIVLNTSFNNAEALKINYGDAYPERTSPDEEFPVDVIGQSEPVKVDERYLSEIISARMEQIFNKAKDALDQIEALELPGGVVLTGGAASLPGVVDLAQEIFGVNVKLYVPNHMGLRNPVFTNVISIVDYSANLSEVYQLAKIAVTGETSAARQMVVEQ…
444	AMQ98770.1	BU192_05695	hypothetical protein AX771_15430 (plasmid)	0.0116	15848	9.82	Membrane	145	MMSKTKKVTSAGSNGSGNPFGIKSGSGGFNIGQQMLKGKAGIKSTGDKRKSVRVPVELYDEVVKDLSYGAKYSLMTEILALFLKEFETHGNSIVTDFGKLKTRPVKISEEAFKVLKVIKFETDQSNTNIIASALTWYLDKRKGKA
445	AMQ98149.1	AS238_09265	hypothetical protein AX771_12160	0.0116	32513	5.02	Membrane	295	MTEPIKNLCKRATAAALVLISLFALSGCQTTKINTTEVSDKEKTAESSKVIEKTTIPTLFFHGYSGTENSFKGMLRRLEKNQQAVKELVLTVGTDGQIQATGDLSGKADNPMVQVLFEDNKNNEWNQAEWIKTCLLYLKENYGIDKVNIVGHSMGGVSALRYLGTYGQDTSLPQVQTLTAIGAPFNDFVDDSAQSLTDELAKGPAVVSNRYQDYQQMIGNIPITTRFFLIAGQLDETDLSDGTVPLNSALAVYALLKQRGNEIEEKVVTGENASHSMLHENQEVDQLVSRFIWKE
446	AMQ96406.1	AWT83_06205	hypothetical protein AX771_01760	0.0116	49315	5.32	Membrane	433	MEKKQKIILGATSALTIVILILSLFFVIRSSTKKEPIIPEKKITEKAKEPTDDKQQLVTQAKNLAQSYDYDQAIALLEKDSKNGSTETQQLLQTLKKEKEQLIDWSDPTQISHVFFHSLIVDPQKAFHSQQAQGYKDYMVTVEEFNRSIEQLYQNDFVLVNLNDLIQKDEQGNLSFNGLALPEGKKPLVLSQDDVSYYEYMDNSGFPSRLVVSNNNEIKNVYKEKDKEEIGDFDMVPLIDAFVKKHPDFSYRGAKGTLALTGYNGVLGYRTSKSQYGDNEKTKKEIKEAKKVAEQLKKDGWSFASHTWGHLNMTQASLEDVKKDNELWQQEVAPILGKTNILIYPFGADISDWQPYSAENQKFAYLKSQGFDIFCNVDASTPAWGQLGTDFYRNARINI…
448	AMQ97688.1	ptsN	PTS fructose transporter subunit IIA	0.0111	17202	5.42	Membrane	152	MTIIHEENIFLQQPLDNQEEAFKFLAKQTFCLGIAHDEKEVYQKLLEREKEGTTGIMSGFAIPHAKSQTINEPSLIIVTLKKGIEWNSLDRQSVDFIFALFIPDSEAGTTHLKLLSLVARSLMRKEVTEQLRAAKSKIEIATILTKEIGEDI
449	AMQ96221.1	treB	PTS beta-glucoside transporter subunit EIIBCA	0.0111	70652	5.4	Membrane	662	MAKYQADAEKLLHDIGGKENIAAVSHCATRMRFVLNDPGKADEKAIEDIPSVKGMFTNAGQFQVIIGNDVSTFYNDFVAVSGVEGVSKEQGKAAAKQNLHPVQRAIAVLAEIFTPLIPAIIVGGLILGFRNVLEGIQFESLGGTIVEHSKFWNGVNAFLWLPGEAIFHFLPVGITWSIAKKMGTTQILGIVLGITLVSPQLLNAYSVASTAAADIPFWDFGFAQVQMIGYQAQVIPAMLAGFMLAYLEIFFRKYIPQSISMIFVPLFSLLPTVLAAHVILGPIGWTVGSWISNIVNTGLTSSISWLFSAVFGFLYAPLVITGLHHMTNAIDMQLIADFGSTNLWPMIALSNIAQGSAVLAIIFLHRGNKKEEQISIPAMISCYLGVTEPAMFGINLKYV…
450	AMQ96422.1	emrB	multidrug transporter	0.0111	52683	9.48	Membrane	490	MSNNQPVDIYGKPYNRTLLVVVLLIGTFCTVLNQTLLTTAFPTLMKAFDISASDVQWLTTGFLLVNGIMIPITAWLINKFSSRNLYLSAMTIFLIGTITCFTAPNFSTLLIGRLIQACGVGVSMPLLQNIMLSIFPPEKRGSAMGMSGIVIGLAPALGPTLSGYIIDNYHWRDLFGMVLPIVVLVLVLAFFLMKSVIPLSNPSIDILSAILSTIGFGSLLYGFSSVGDDGWGSLKVIGFLVVGVIFIALFSWRQLHLEHPFLELRVFKSSTFTIAAVLAGVTNMAMVGAEMVVPLYIQNIRGESAFHSGLMLLPGALIMGAMMPVTGAIFDKYGAKRLAITGMFILTAATAPFAFLTKTTPVLYIVILYAIRMFGISMVMMPVTTSGMNALPNNLISHG…
453	AMQ98772.1	BU192_05685	CAAX protease (plasmid)	0.0111	17211	7.85	Membrane	147	MQILEDIKIYWKRIIGYTLVLLVVNLFLSMIALVFVNQRKDNVTELVTFISFFISGIFAPFFEETLMRGIIQNQLELKTNLSTRSIYIIVAILFSLSHLNLYFIPYFMTSLILSFVYDNSDKRLIVPVTIHCFYNLIVILLSVVFYT
454	AMQ96818.1	gtrA	teichoic acid glycosylation protein	0.0105	18126	6.11	Membrane	156	MKQYRQLKGYLEAKGYWEILVYLFFGGLATIVNFVSFALARQYFDLSMALSNSISWFCSVLFAFVTNKLWVFHSKSPNFTHALIECGKFFFYRILSYGLDMGAMVLLINVMNSNEYVAKIITQIIVILANYIFSKLFIFKETEVFEEEVGQSEKDD
456	AMQ97027.1	afr	oxidoreductase	0.0105	35676	5.02	Membrane	318	MKKYQWGIVGLGTIAHEFAESFNQETSELTAVASRTSEKAENFAHRYNIPKAYGSYQEMLDDAEIDIVYIAVPNRQHIDHILAALEAGKHVLCEKAITMNKKELADAMRLAEEKNLILAEAMTIFNMPLYQQLRSIMDTGKLGALKMIQAPFGSYKEPDPKNRFFNPELAGGALLDIGTYAVSFARFFLSSQPEVVASTMVPFETGVDEQSVTILRNKENELAAVSLTFQAKMPKVGIVAFENGYVTIADYPRADRAEILFTDGTKEFIESGNTSEAMNYEIKNMVHMIEGDLPNRSLFLTKDVIEILDQMQVLWKNM
459	AMQ98155.1	ytlR	diacylglycerol kinase	0.0105	36016	8.92	Membrane	321	MKFHYHILINPSAGSGNGYKVAERILPVLKNKHIDYTLHYSEYKGHDAEIAETLAKETLIPWIEEEQKTIDTFPLLIIVGGDGTLHQVLDTFYQMEVEFPVAYIPAGSGNDFARGAGLPKNPKKGLQLILAAQSPEKVHIMAYEEKISEKKGIAVNNFGIGLDAAIVHATNHSSTKKRLNKYNLGSFSYLFSILRALFTQKGFPILVDAGGKQLSFSNAFLCTATKHPFFGGGIAIVPTADASKPVIDFVVVERINFFKILWLILLLIQKKQLKSKYFHHYTTNRLRIVSTTPQHGQEDGEEMEKRPFDITITTTKQLFWC
461	AMQ96953.1	A5810_000041	arginine:ornithine antiporter	0.0105	54586	6.45	Membrane	507	MEQTKKKKFQMPSAYTVLFIIIAVIAVLTWFIPAGHYSVDDAGNIVAGSYERVQQNPQGLWDIFMAPINGMLGVPAGELTKETPAAIPISFFILVVGGFLGIINKTGALDAGIASVVKKFKGKEKMLIPVLMLLFALGGSTYGMAEETIPFYALLIPVMMAVGFDTVVAVAIVLVGSQVGCLASTVNPFATGVASQAVGISMGEGIGLRFLMFVILLAISIVYVYRYASKIEKDPTKSLVYNQRKEDMKHFDIEAIGRQEVITKKQKHVNVLFFITFGIMIISLIPWTTLNANFTIFESLTNWLTNLPVLGTVLGKSMLPLGDWYFPEITMLFLVMSIVVAITYGMKESEFVSEFLAGASDLIGVAIVVAVARGIQVVMNNGLITDTILHWGEQGLSSL…

## Sheet: MVsLIN
Number	Accession number	Gene name	Description	Mol%	MW	PI	Cellular localization	No. of amino acid	Sequence
1	AMQ96151.1	rplW	50S ribosomal protein L23	9.9026	11034	9.8	Cytoplasmic	96	MNLLDVIKRPVITEKSMLAMDDKKYTFEVDTRANKTLVKQAVEAAFDVKVKNVNIVNVRAKFKRMGKYAGYTKKRRKAIVTLTEDSKEIQLFEAAE
2	AMQ96148.1	rpsJ	30S ribosomal protein S10	5.7066	11687	9.99	Cytoplasmic	102	MAKQKIRIRLKAYEHRILDQSADKIVETAKRTGASVSGPIPLPTERSLYTIIRATHKYKDSREQFEMRTHKRLIDIVNPTPKTVDALMKLDLPSGVNIEIKL
3	AMQ96153.1	rpsS	30S ribosomal protein S19	5.2043	10515	10.04	Cytoplasmic	92	MGRSLKKGPFVDEHLMKKVEAQAGVEKKKVIKTWSRRSTVFPSFVGYTIAVYDGRKHVPVYIQEDMVGHKLGEFAPTRTYRGHAADDKKTKR
4	AMQ96166.1	rpsE	30S ribosomal protein S5	4.1917	17467	9.43	Cytoplasmic	166	MVYIDPKHLELEDRVVAINRVTKVVKGGRRLRFAALVVVGDKNGHVGFGTGKAQEVPEAIRKAIEDAKKNLVEVPMVGSTIPHEVIGAFSGGRILMKPAVEGSGVAAGGPVRAVLELAGVADITSKSLGSNTPINVVRATVEGLKQLKRAEEVAELRGKSVEELIG
5	AMQ98144.1	rplA	50S ribosomal protein L1	3.2079	24521	9.27	Cytoplasmic	229	MAKKSKKMQDALKKVDSSKVYPVAEAVALAKETNIAKFDATVEVAYRLNVDPKKADQQIRGAVVLPNGTGKTQTVLVFAKGDKAKEAEAAGADFVGDDDMVQKIQNGWFDFDVVVATPDMMATVGRLGRVLGPKGLMPNPKTGTVTMDVTKAVNEVKAGKVTYRVDKAGNIHVPIGKVSFDDEKLVENFAAIHDVLLKAKPSAAKGQYMKNVTITTTFGPGIHVDQASF
6	AMQ96152.1	rplB	50S ribosomal protein L2	2.6769	30277	10.53	Cytoplasmic	277	MAIKKYKPTSNGRRNMTGSDFAEITTSTPEKSLLQPLKNHAGRNNNGRITVRHQGGGHKRQYRVIDFKRNKDNVVATVQTIEYDPNRSANIALVHYEDGVKAYILAPKGLEVGMKLVSGPEADIKVGNALPLENIPVGTVIHNIEMKPGKGGQLIRSAGTSAQVLGKEGKYVLIRLNSGEVRMILAACRATIGSVGNEQHELINIGKAGRSRWMRKRPTVRGSVMNPNDHPHGGGEGKAPIGRKAPVSPWGQPALGYKTRNKKAKSDKLIVRRRKNK
7	AMQ96173.1	rpsM	30S ribosomal protein S13	2.3751	13526	10.78	Cytoplasmic	121	MARIAGVDIPRDKRVVVSLTYIYGIGNTTAKKILADAGVSEDVRVRELTNEQTDAIRAEVDKLKVEGDLRREVNLNIKRLMEIGSYRGIRHRRGLPVRGQNTKNNARTRKGPARAIAGKKK
8	AMQ96161.1	rplE	50S ribosomal protein L5	2.2687	20177	9.3	Cytoplasmic	179	MNRLKEKYLKEVTPSLMEKFNYSSVMQTPKVEKIVINMGVGDAVSNAKNLDKAVEELTLITGQKPMITKAKKSIAGFRLREGMPIGAKVTLRGERMYEFLDKLVSVSLPRVRDFHGVSKKAFDGRGNYTLGIKEQLIFPEVDYDLVDKVRGMDIVIVTTANSDEESRELLTQLGMPFQK
9	AMQ96149.1	rplC	50S ribosomal protein L3	2.2236	22764	10.16	Cytoplasmic	209	MTKGILGKKVGMTQIFTESGELIPVTVVEATPNVVLQVKTMETDGYEAIQVGYQDMREVLSNKPAKGHVAKANTAPKRFIREFKNVELGEYEVGKEITVDVFQAGDIIDVTGTTKGKGFQGVIKRHGQSRGPMAHGSRYHRRPGSMGPVAPNRVFKNKRLAGRMGGNRVTIQNLEVVRVDAERNVILIKGNVPGAKKSLITIKSAVKAK
10	AMQ96108.1	rpsR	30S ribosomal protein S18	2.0319	9106	10.98	Cytoplasmic	78	MAQQRRGGRKRRKVDYIAANHIEYIDYKDIELLKRFISERGKILPRRVTGTGAKNQRKITVAIKRARIMGLLPFVSED
11	AMQ96147.1	tuf	elongation factor Tu	1.9095	43198	4.79	Cytoplasmic	395	MAKEKFDRSKPHVNIGTIGHVDHGKTTLTAAITTVLSKKNGGQAMAYDQIDGAPEERERGITISTAHVEYETDTRHYAHVDCPGHADYVKNMITGAAQMDGAILVVSAADGPMPQTREHILLSRQVGVPYIVVFLNKVDMVDDEELLELVEMEVRDLLTEYEFPGDDVPVVAGSALKALEGDASYEEKILELMAAVDEYIPTPERDNDKPFMMPVEDVFSITGRGTVATGRVERGQVRVGDEVEVVGIAEETSKTTVTGVEMFRKLLDYAEAGDNIGALLRGVAREDIQRGQVLAKPGTITPHTKFSAEVYVLTKEEGGRHTPFFTNYRPQFYFRTTDVTGVVELPEGTEMVMPGDNVTMEVELIHPIAIENGTKFSIREGGRTVGAGVVTEIKA
12	AMQ96683.1	rplU	50S ribosomal protein L21	1.8226	11094	9.63	Cytoplasmic	102	MYAIIKTGGKQVKVEVGQAIYVEKLDVEAGEKVVFDEVILVGGESTKVGAPTVAGATVEGTVEKHGKQKKVVTFKYKPKKHSHRKQGHRQPYTKVVIDAINA
13	AMQ96212.1	rpsD	30S ribosomal protein S4	1.5655	23153	9.75	Cytoplasmic	203	MSRYTGPSWKISRRLGISLSGTGKELARRPYAPGQHGPNSRGKQSEYGMQLTEKQKLRHMYGMNERQFRNLFVKASKIKEGKHGVNFMILLEQRLDNVVYRLGLATTRRQARQLVNHGHILVDGKRVDIPSYHVEVGQVISVREKSQNIVTVKEAVEATVGRPAFVSFDAEKLEGSLTRLPERDELYPEIDEALVVEYYNQSL
14	AMQ96758.1	cps	phage capsid protein	1.4921	42551	5.07	Cytoplasmic	386	MTVKNLKGVTAASDQLMKAFKDGNEESFSAAMVSLSKEIQDKILEEATAKNQDQLVLMNRGQRVLTTQETKFYNEVVKNEGFAGVEELVPATVFERVFEDLEQSHPLLQKITFVNTTGVTEWIVSRGVNPAWWGKLCEAVKKVLDNGFDVINMKQFKLSGYIPVCKAMLDLGPVWLDRYVRTVLVESLRIALEQAIVDGTGKDMPVGMMRDMSKQTSGEYAEKKAEPITALDAVTMGGLMARLSKFNIEGVNDPIYRNVNPSDVVLIVNPTDYWSKVFPAKTVLTANGEYVQVLPVPVSDLQSTAVPEGKAVIGVASDYFMGVGSTLKIEASDEYHFVEDERIYLAKQYANGQPKRNDSFIVLDISALGTTTTTTKPTTTTTTTQA
15	AMQ97434.1	rpsB	30S ribosomal protein S2	1.2777	29312	4.93	Cytoplasmic	260	MAVISMKQLLEAGVHFGHQTRRWNPKMKKYIFTERNGIYIIDLQKTVKLVDAAYDYMKSVAEEGGVALFVGTKKQAQEAIKEEATRAGQYFVNHRWLGGTLTNWDTIQKRISRLKQINAMEEDGTFEVLPKKEVAGLNKERERLEKFLGGIADMPRIPDVMYIVDPRKERIAVQEAHKLNIPIVAMVDTNCDPDEIDVVIPSNDDAIRAVKLITSKMADAFIEGNQGEDQVVEEDFTEENTATSIEEIVDVVEGDNSSAE
16	AMQ97737.1	smc	hypothetical protein AX771_09720	1.2051	58654	4.81	Cytoplasmic	522	MKERERILDLVKKGILSTEEGLDLLESMATEKDEKQIKKEADKVTASHKEKDQASQLIDKLENGEEEISEPVDPKERERQDQENLEKILDELATEANKTSARLDEVNAQFADNKAARNEKQEALMQLNTKEELGELTEEELAQRQTLEADIKELEASGDTLLEEQLKLEAELKDIRKNQWSEKKETFTDKFELPDDWKDQATDTLNQVGEKMSEAGSQLGKFLKKTFQTVSETVNDNMEWKDVSLRVPGIATTKFEHEFYYEAPAASILDIKAANGNVTLKTWDSNDVKVEAKIKLYGKMGAEPFEAFSERSQIEVNEDHISFQIPNKRVRADLVFYLPKRVYDHAAIKLLNGNIMIETLEAKDIYTKSTNGNIIVDQLTATMLEVEGVNGNIDIRNGN…
17	AMQ96298.1	rpmI	50S ribosomal protein L35	1.184	7809	12.66	Cytoplasmic	66	MPKQKTHRGSAKRFKRTGKGGLKRFRAFTSHRFHGKTKKQRRQLRKASMVSSGDFKRIRQQLAKMK
18	AMQ98113.1	groEL	molecular chaperone GroEL	1.0426	57149	4.66	Cytoplasmic	541	MAKELKFAEDARAAMLRGVDKLADTVKVTLGPKGRNVVLEKSYGSPLITNDGVTIAKEIELEDHFENMGAKLVSEVASKTNDIAGDGTTTATVLTQAIVREGLKNVTAGANPLGIRRGIELATKAAVEELHNISTVVDSKEAIAQVAAVSSGSDKVGHLIADAMEKVGNDGVITIEESKGIETELDVVEGMQFDRGYLSQYMVTDNDKMEAVLENPYILITDKKISNIQDILPLLEQILQQSRPLLIIADDVDGEALPTLVLNKIRGTFNVVAVKAPGFGDRRKAMLEDIAILTGGTVITDDLGLELKDVTIENLGNASKVVVDKDNTTIVEGSGEKEAIEARVQLIKNQIAETTSDFDREKLQERLAKLAGGVAVVKVGAATETELKELKLRIEDALN…
19	AMQ97702.1	tagU	transcriptional regulator	1.0265	35339	5.8	Cytoplasmic	314	MARRRRKSRGKKIFLIILAVLIVLVLAIVGVGAKLYLDLSHSIEKTYESVERTQGERTKPVDLNKQESFSVLLMGIDTGDLGRVDQGRSDTMMVATVSPEDKQTTIVSIPRDTYVDIVGRDTKDKINHAYAFGGAAMAMDTVQKYVDIPIDHYVSINMKGLKELVDAVGGIEVNNDLTFSQDGYDFTIGKITLNGDQALSYSRMRYEDPNGDYGRQERQRKIVEGVAKKVLSLNGVSNYQSVLNALESNMKTDMSFDEMKKIALDYREAFGTIKQDQLQGEGFMQDNISYQKVSDQELDRVKKELKDQMNLENK
20	AMQ96299.1	rplT	50S ribosomal protein L20	0.9176	13613	10.71	Cytoplasmic	119	MARVKGGTVTRKRRKRVLKLAKGYYGSKHTLFKTAKEQVMNSYNYAYRDRRQKKRDFRKLWIARINAAARMNGLSYSKLMHGLKVAEIDINRKMLADLAVNDAAAFTALADQAKEALAK
21	AMQ96155.1	rpsC	30S ribosomal protein S3	0.8885	24333	9.76	Cytoplasmic	218	MGQKVHPIGMRVGIIRDWDAKWYAEKEYAEFLHEDLRIRKFISTKLADAAVSTVEIERATGRVNISIHTAKPGMVIGKGGSEVESLRKELNKLTGKRIHINIVEIKKPDLDAKLVGEGIARQLENRVAFRRAQKQAIQRSMRAGAQGIKTQVSGRLNGADIARSEGYSEGTVPLHTLRADIDYAWEEADTTYGKLGVKVWIYRGEILPTKKNTEKGGK
22	AMQ96851.1	yhbY	RNA-binding protein	0.8729	11778	9.3	Cytoplasmic	103	MSLRGKQKRFLRSKAHHLQPIFQIGKGGINSAMIVQIEEALEKRELIKVSLLQNTDEIAEEAAQVLEKEIDCEIVQIIGRVIVLYKPSTKEKYQRLSKEVKAI
23	AMQ96168.1	rplO	50S ribosomal protein L15	0.7918	15471	10.43	Cytoplasmic	146	MKLHELKPAEGSRQVRNRVGRGTSSGNGKTAGRGQKGQKARSGGGVRLGFEGGQTPLFRRLPKRGFTNVNRKDYAVINLDVLNRFEDGAEVTPVALVEAGIVKNEKAGIKVLANGELNKKLTVKAAKFSKAAQEAIEAAGGSIEVI
24	AMQ96145.1	rpsG	30S ribosomal protein S7	0.772	17801	9.98	Cytoplasmic	156	MPRKGPVAKRDVLPDPIYNSKLVTRLINRVMVDGKRGIAANIIYNAFDLIKESTGNDPLEVFEQAMKNVQPVLEVKARRVGGSNYQVPVEVRPERRVTLGLRWVVNYARLRGEHTMEERLAKEIMDAANNTGASVKKREDTHKMADANRAFAHYRW
25	AMQ98016.1	lepB	S26 family signal peptidase	0.6103	21651	5.36	Membrane	189	MKEFLKNWGILILVLAAILLARVYVFTPVTVNGHSMDPTLSDGQRLISSKISNYERMDIITTKEPGDEERMIVKRIIGMPGDTVKMENDQLTINGKKYDEPYLDEFKKEFSEDKLQGEYAYSSGFQAQAESSSTFTSDFEYTVPKGKYLVLGDNRLISKDSRMFGLVDKDMIQGKVVFRYWPLSEIKIM
26	AMQ96257.1	cshA	DEAD/DEAH box helicase	0.6074	56196	9.49	Cytoplasmic	503	MKFKELELSPELLKSVERAGFEEATPIQAETIPLALAGKDVIGQAQTGTGKTAAFGLPMLEKIDPDRHELQGLVIAPTRELAIQTQEELYRLGRDKKVRVQAVYGGADIGRQIRGLKDRPHIVVGTPGRMLDHINRHTLKLGTVQTLVLDEADEMLNMGFLEDIEKIISQVPDQRQTLLFSATMPPAIKNIGVKFMKNPHHVKIKAKEMTADLIDQYYVRAKEYEKFDIMTRLFDVQTPELTIVFGRTKRRVDELARGLEARGYRAEGIHGDLSQQKRMSVLRSFKSGHLDILVATDVAARGLDISGVTHVYNYDIPQDPESYVHRIGRTGRAGKGGMSVTFVTPNEMDYLHVIENLTKKRMTTLRPPTEKEAFKGQLGAAVEQIETKLAENGLDKYLQ…
27	AMQ96154.1	rplV	50S ribosomal protein L22	0.5732	12443	10.22	Cytoplasmic	115	MAEQITSAKATAKTVRTSPRKARLVIDLIRGKSVADAISILKFTPNKSAGIIEKVLMSAVANAENNFDLDVENLVVSEAFVNEGPTMKRFRPRAKGSASPINKRTSHITVVVSEK
28	AMQ96165.1	rplR	50S ribosomal protein L18	0.5107	12972	10.18	Cytoplasmic	118	MITKPDKNKTRQKRHRRVRNNISGTAERPRLNVFRSNKNIYAQIIDDVAGVTLASASTLDKEISGGTKTEAAQAVGKLVAERAAEKGIKVVVFDRGGYLYHGRVQALAEAARENGLEF
29	AMQ98310.1	recA	DNA recombination/repair protein RecA	0.4917	37491	5.11	Cytoplasmic	349	MADDRKAALDAALKKIEKSYGKGSIMKLGEKIDQQISTIPSGSLALDVALGVGGYPRGRIIEVYGPESSGKTTVALHAIAEVQKNGGTAAFIDAEHALDPQYAQKLGVNIDELLLSQPDTGEQGLEIADALVSSGAVDIVVVDSVAALVPRAEIDGEMGDSHVGLQARLMSQALRKLSGSINKTKTIAIFINQIREKVGVMFGNPEITPGGRALKFYATIRLEVRRAEQLKQGTDIVGNRTKIKVVKNKVAPPFKIAEVDVMYGLGISQEGELLDMAVEKDIVDKSGAWYSYKEDRIGQGRENAKIYMANHPEMMAEVSALVRAAYGIGEEVAVPEDEKGQEELPLVEE
30	AMQ97619.1	rplS	50S ribosomal protein L19	0.4888	13196	10.94	Cytoplasmic	115	MNPLIEELTKEQLRSDIPAFRPGDTVRVHAKVVEGTRERIQLFEGVVIKRRGAGISETYTVRKVSNGVGVERTFPLHTPRVAKIEVVRYGKVRRAKLYYLRALHGKAARIKEIRR
31	AMQ97250.1	HMPREF1359_02858	penicillin-binding protein	0.4858	73705	4.88	Membrane	679	MKRSDKHGKNRTGAYIAGAVILIAAAGGGYFYYQHYQETQAVEAGEKTVEQFVQALNKGDYNKAAEMTSKKAANKSALSEKEILDKYQNIYGAADVKGLQISNLKVDKKDDSTYSFSYKAKMNTSLGELKDLSYKGTLDRNDGQTTINWQPNLVFPEMEGNDKVSLTTQEAARGNIIDRNGEPLATTGKLKQLGVVPSKLGDGGEKTANIKAIASSFDLTEDAINQAISQSWVQPDYFVPLKIIDGATPELPAGATIQEVDGRYYPLGEAAAQLIGYVGDITAEDIDKNPELSSNGKIGRSGLEMAFDKDLRGTTGGKLSITDADGVEKKVLIEHEVQNGKDIKLTIDAKAQKTAFDSLGGKAGSTVATTPKTGDLLALASSPSYDPNKMTNGISQEDY…
32	AMQ97404.1	artM	peptide ABC transporter ATP-binding protein	0.4846	27448	4.92	Cytoplasmic	245	MAEKILVEHLVKKYGDNTVLNDINVSINEGDVVCIIGPSGSGKSTFLRCLNRLEEPSDGEIIIDGAHLMDKSTDINLVRQHIGMVFQHFNLFPHLSILENIILAPMDLKKESREEAEKKAIKLLQTVGLEDKKDMYPEMLSGGQKQRVAIARALAMNPDIMLFDEPTSALDPEMVGDVLNVMKKLAEQGMTMVIVTHEMGFAKEVANRVMFIDDGNFLEDGTPQQIFENPQNERTKDFLNKVLNI
33	AMQ96134.1	tmpC	hypothetical protein AX771_00205	0.4415	37775	4.58	Extracellular	360	MKKAKLFGLGAVALAAGLFLGACGNNGSTDSSGGKSSSDTTTAALITDTGGVDDRSFNQSAWEGLEKWGKDQGLSRGNDGFQYFQSSNESDYIPNIDQALNAGFKTIFGIGYKLKPAIQEQATNNTGTNFVIIDDVIDGLDNVVSATFKDNEASYLAGVAAAYTTETNVVGFIGGVKGEVIDRFDAGFKAGVDAGAKELGKEIKVLNQYAGDFSAPDKGRSIAQGMYAQNADIIFHASGGTGNGVFQEAKSLNESGDKKVWVIGVDRDQSDEGEYTLNGEKKNFTLTSTLKAVGTVVEDLAQKSADGKFPGGEHTVYGLKEDGVGLTEGQLSDEAKKAVDEAKEKIISGDVKVPETPEEN
34	AMQ96174.1	rpsK	30S ribosomal protein S11	0.4402	13727	11.28	Cytoplasmic	129	MAAKKVNRKRRVKKNIEAGIAHIHSTFNNTIIMITDTHGNALAWSSAGSLGFKGSKKSTPFAAQMAAETATKAAMEHGLKTVEVTVKGPGSGREAAIRSLQATGLEVTAIRDVTPVPHNGARPPKRRRV
35	AMQ98079.1	HMPREF1359_00603	hypothetical protein AX771_11770	0.4398	12442	6.82	Cytoplasmic	117	MVYVKKSETFKEINFLKSQQFISFTKQVDHTHAGVVNGVLPAGSVYPANDGKAEGITINDVDVSNGAQPVGVIIDGHILIERLPVKPSDAAQKAMREIKLYDASGKMIALPAAASGL
36	AMQ96144.1	rpsL	30S ribosomal protein S12	0.4322	15206	11.28	Cytoplasmic	137	MPTINQLVRKPRKSKVEKSNSPALNKGYNSFKKTQTNVNSPQKRGVATRVGTMTPKKPNSALRKYARVRLSNLIEVTAYIPGIGHNLQEHSVVLLRGGRVKDLPGVRYHIVRGALDTAGVNDRKQSRSKYGTKKPKA
37	AMQ98404.1	rpsI	30S ribosomal protein S9	0.3993	14336	10.55	Cytoplasmic	130	MAQVQYIGTGRRKNAVARVRLVPGTGKITVNKKDVEEYIPHADLREVINQPFAVTETKGAYDVFVNVNGGGYAGQSGAIRHGIARALLEVDPDFRLALKRAGLLTRDARMVERKKPGLKKARKASQFSKR
38	AMQ96159.1	rplN	50S ribosomal protein L14	0.3875	13066	10.27	Cytoplasmic	122	MIQAESRLKVADNSGAREILTIKVLGGSGRKTANIGDVIVATVKQATPGGVVKKGDVVKAVIVRTKSGARRTDGSYIKFDENAAVIIRDDKSPRGTRIFGPVARELRENNFMKIVSLAPEVL
39	AMQ98405.1	rplM	50S ribosomal protein L13	0.3638	16311	9.95	Cytoplasmic	147	MRTTYMAKPGEVERKWYVVDATDVPLGRLSTVVASVLRGKNKPTFTPHLDTGDFVIVINADKVKLTGKKATDKIYYRHSNYPGGLKSITAGELRAKNSRRLIETSVKGMLPKNTLGRKQFTKLNVYGGAEHPHAAQQPEVLDITNLI
40	AMQ96164.1	rplF	50S ribosomal protein L6	0.3634	19209	9.63	Cytoplasmic	178	MSRIGNKVVVIPEGVTVTQDGNNVTVKGPKGELTRTFSADIKMNIEGNEVTFTRPNDSKEMKTIHGTTRANFNNMVVGVSEGFQKALELIGVGYRAQLQGSKLVLNVGYSHPVEITPPAGVTVEVPANTQVIVKGANKEEVGELAANIRGTRPPEPYKGKGIRYVGEYVRRKEGKTGK
41	AMQ97781.1	eno	enolase	0.363	46482	4.61	Cytoplasmic	432	MSIITDVYAREILDSRGNPTIEVEVYTESGAFGRGMVPSGASTGEYEAVELRDGDKARYGGKGVTKAVDNVNNIIAEAIIGYDVRDQMAIDKAMIALDGTPNKGKLGANAILGVSIAVARAAADYLEVPLYHYLGGFNTKVLPTPMMNIINGGSHADNSIDFQEFMIMPVGAPTFKEALRMGAEVFHALASILKARGLATSVGDEGGFAPNLGSNEEGFEVIIEAIEKAGYVPGKDVVLAMDAASSEFYDKEKGVYVLADSGEGEKTTDEMIKFYEELVSKYPIISIEDGLDENDWDGFKKLTDVLGDKVQLVGDDLFVTNTQKLSEGIEKGIANSILIKVNQIGTLTETFEAIEMAKEAGYTAVVSHRSGETEDSTISDIAVATNAGQIKTGSLSRTD…
42	AMQ97094.1	yxeA	hypothetical protein AX771_05890	0.3508	13693	6.15	Cytoplasmic	123	MKVIKYLIGLAAISGILLFGLKYYTEGSYGEIPGILDQLNPLVEKGEVYVKTQKPEEVNEYGTARYVQKAADANGKERTVEFNGLSVLKENHYLKISNKGAHIETYEEVPREKVPEKALAIIG
43	AMQ96688.1	manX	PTS mannose transporter subunit EIIAB	0.3478	35640	5.14	Membrane	329	MVGIILASHGQFAEGILQSGSMIFGEQENVKAVILKPSEGPDDLRAKLEEAVASFDNQDEVLFLVDLWGGTPFNQSNTLFEEHKDKWAIVSGLNLPMLIEAYASRFSMESAHEIAAHIIETAKDGVKVKPEELEPAEAPKAAVEDAQPKGALPEGTVVGDGKIKYVLARVDSRLLHGQVATAWTKAVQPNRIIVVSDAVSKDDLRKRLIEQAAPPGVKANVIPISKMIEVAKDPRFGNTKALLLFENPEDVLTAVEGGVDIKELNVGSMAHSVGKVVVSKVLSMGQEDVEAFEKLEQKGVKFDVRKVPNDSRDNMDDILKKAKAELAKA
44	AMQ97671.1	dacA	D-alanyl-D-alanine carboxypeptidase	0.3406	47679	4.83	Membrane	435	MSIKKTRLVLLLASLILCLASFLPAVAVQAEDTFKVNAKAAFAVDAQSGKILYDQDGEKTMGIASITKIIGLYIVLDQVKEGKLSWDDKVSISDYAENLSVTPDLSNVPLHKENTYTVKELFDSAIIQSANASMVALAEKISGSEAKFTERMKEQLKDWGIKDATIVNASGLNNSYLGENRPEGTGENDENQMSAQDVAIVARHLILDFPEILDVSSTTTQMFGENTQSPVEMVNWNWMLPGFVNYKEGVDGLKTGTTELAGACFVGTITKNDQRIITVVLNADGHAENPSARFNETARLMDYCYDNWSEKELGKANASIPSLKTIDVKDGKESTVPVVLKSPVKVWVRNDMDTGKLTITPTLDKKQVTDNEIQAPMDKGTKIGTATITLAEDKLGYLE…
45	AMQ97535.1	acrR2	TetR family transcriptional regulator	0.3204	21810	5.88	Cytoplasmic	188	MRRKVYTKDQILKAAYDVVAKEGFKGFTARNIAKKMGISTQPIYLEFKNMEDLKNTLLDSIFEQLKEDVFPIERTGDKIIDLGLNYIYFAKKHHSLYMASYIDEHGDGKKMHDFSYNYFREIVKEDERYNQLSDEYVDALHTGTWVAVTGLASLMSSNIMHPTEEQIIALIKRTIDSILALDNPEIIR
46	AMQ98740.1	BU192_01090	hypothetical protein AX771_15245 (plasmid)	0.3187	32459	4.79	Membrane	288	MKKLRVIATIPMIFSFALLLSACGKEEAGAKSNEAHNISFIDSAEQKDSRCWLVVETSSKNKTPIDKNEYVKAVIQTKDGKAKVFKTDMEQLTLEKVSKMSDEEIIEQALNADKQKFNDKKKSDIDSYNATLDSVKTELENEEKQEFQNDQKIADFQDSIPKIQADIEEIDGVQYSEPEWKMVSATIKMDNENKSPSMETVKLSYKYLDSPIWNLNSFGEVSSEGELSYESTSMDLKLSIPVATTKVLDNFYSGYSNDELDQLLLTKVASKDNKVQLDSKGKNVSIVE
47	AMQ97350.1	AS238_11150	ABC transporter substrate-binding protein	0.306	46809	4.39	Membrane	428	MNIRKLIAGVVCLAAASGFLTGCGSASSTADKEEKVTVWAWDETFNIKAVNEAKKVYENEETEIEVVTMSQDDIVQKLNTALASGNTEGLPNIVLIEDYRIQGYLTSYPDAFANLSAIVKEDHFAPYKFAVNKVGDKIYGVPFDSGVTANFYRTDLMAEAGYTEEDMENLKWDEYIQVARDVKEKTGKKIAEVNPSDLGRVRMIMQQAGEWYTSEDGETVTIQDNASLKYGLELFATLLKEDLVEQTSDWNAGVTAIQSGAVASSPTGAWYSSTIQGAENQSGKWKIAPIPALPENLQKAQASNLGGAGWYVIKGVAGEDSAKDFLEATFASNEELMGTLAKEIGLVSTMLSANEQEAYQEASEFYSGQKIFDDFSTWTSEIPEVNYGHETYAIEAVVA…
48	AMQ96805.1	mltG	aminodeoxychorismate lyase	0.2993	44200	5.28	Membrane	391	MSGNKQHPSKDKKEASKAATADIIDKRRNLRKKEDKIVRKIILVIALTLLIIGGFLGFTVYRYVDSGLKPLDKSDDQLVQVEIPSGSSNKQIGEILEKDNIIKSGIVFNYYTKFKNLTGFQAGYYQLAPNMTLDEIGKQLQEGGTSEPTKVADGKIAIPEGYDIDQIAERVAKVTGKDKKEFLDLVNDETFFNELYQKFPELLESASKAENTKYRLEGYLFPATYDYYTSTSLKNLVIEMVNKTNTVMQNYYSAIKQKNLTVQEVLTLASLVEKEGVKENDRKNIAQVFFNRIKANMPLQSDISVLYALGEHKELVTYEDTAVDSPYNLYTNTGYGPGPFDNPSEEAIKAVLEPAENDYYYFVADTSTGNVYFAKTYEEHMELVQKYVNNS
49	AMQ98143.1	rplJ	50S ribosomal protein L10	0.2988	17763	5.21	Cytoplasmic	167	MSEAIIAKKAAIVDEVSEKFTAAASVVVVDYRGLTVDEVTRLRKQLRDANVEMKVIKNSILSRAAKKAGLEGMDEVFTGPTAVAFSNEDVVAPAKIMDEFAKEAKALEIKGGIIEGKVSSLEEITALAKLPNREGLLSMLLSVLQAPVRNVAYAVKAVADKEDGDAA
50	AMQ97748.1	ftsE	cell division ATP-binding protein FtsE	0.2959	25684	9.37	Cytoplasmic	228	MIEMKDVMKKYSNGTTAIRNLSIVIEQGEFVYVVGPSGAGKSTFIKLMYREEKASKGTLNVAGHDLIAIKNREVPYLRREIGVVFQDYKLLPRKTVYENVAYAMQVIGRKPRDIKKRVMEVLDLVGLKHKVRVFPSELSGGEQQRVSIARAIVNTPKVLIADEPTGNLDPENSWEIMKLLDRINAQGTTVVMATHNSTIVNTIRHRVIAIENGRIIRDQAEGEYGYDD
51	AMQ98527.1	HMPREF1359_02443	hypothetical protein AX771_10795	0.2959	24108	9.19	Membrane	214	MVQSLSTEQIKTKFSSNSSNLSAKDIQKNRLEYFKKNSDLIIGDIIFNDKDRAFLIKKSILMNRAQIIVKYDEIQTFTPIFLGGQIKKHHGITRALVGGALAGPIGALIGAGTGGKEWESINRLGIEIYLKDNRIIKYDLISNETKINSLIGKNSFDQYNHLSAKLESILSNQTSTSVEITSQIDEIRKYKELLDEGIISQKEFNEKKKELLNL
52	AMQ96163.1	rpsH	30S ribosomal protein S8	0.2887	14831	9.15	Cytoplasmic	132	MVMTDPIADFLTRIRNANMVKHESLEVPASKIKRDIAEILKREGFVRDVEYIEDDKQGVIRVFLKFGKNGERVITNLKRISKPGLRAYVKADEVPKVLNGLGIAIISTSEGVVTDKEAREKNIGGEVIAYVW
53	AMQ97714.1	rpsU	30S ribosomal protein S21	0.2874	6954	11.29	Cytoplasmic	58	MSKTVVRKNESLDDALRRFKRSVSKAGTLQESRKREFYEKPSVRRKKKSEAARKRKKF
54	AMQ96568.1	B4W81_01250	sortase	0.2765	26375	4.94	Membrane	237	MKKKGKAKRWLVNILLFLLLLVGLALIFNEQIKDYFVRETGDKYAIANVTKEDLKKNNDKDVSFDFDAVEPMTTEGVMRSQMRGTDLPVIASIAVPSVSINLPVFKGLDNTSLLYGAGTLSPDQEMGKGNYALASHRATNPELLFTPLENLEMGAKIYLTDLENVYTYKTFFKEKVAPTDTQLLNEVEGKEIVTLITCGDMDAVTRLVVQGELESVTSIKDATDDMRSAFNLETKTF
55	AMQ98074.1	CUS93_13145	phage tail protein	0.268	18637	4.34	Extracellular	170	MEALKGIDVILLYRLLKKETQEAAWKMAFQTEHENGLSRDSDSTVTKDGNVQSLSPVEYDFSATSIVAKGDSHVDEMKQALLNGDIIEIWEINKAEQGTDDNANKYKATYYQAYVSEFTPSAAAEDNVELNLSFAVNGVGQDGYATLTEDQADVVQYAFKDTVKATSTGA
56	AMQ96175.1	rpoA	DNA-directed RNA polymerase subunit alpha	0.2638	35148	4.99	Cytoplasmic	312	MIEFEKPRIAKIDEEKDYGKFIVEPLERGYGTTLGNSLRRILLSSLPGAAITNIQIDGVLHEFSTIKGVREDVTQIILNIKGLALKMYGQEEKTLEIDITGPATVTAGDIIVDSDVEILNKDMYICSVSEGATFHARLTVKPGRGYVQADENKKEDMPIGVLPVDSIYTPVRRVNYQVENTRVGHREDFDKLTMEIWTDGSIEPLEAMSLSAKIMTEHLDIFVNLTDEAKNAEIMVEKEETQKEKMLEMTIEELDLSVRSYNCLKRAGINTVQELTNKSEPEMIKVRNLGRKSLEEVKAKLHDLGLGLRKED
57	AMQ96157.1	rpmC	50S ribosomal protein L29	0.2613	7339	9.77	Cytoplasmic	62	MKVKEIRELTTAEMLDQEKQLKEELFNLRFQLATGQLENTARIKEVRKSIARIKTVLREQAK
58	AMQ96238.1	rpsO	30S ribosomal protein S15	0.2596	10616	10.12	Cytoplasmic	89	MAISKERKNEIINEYARHEGDTGSPEVQIAVLTEEINHLNEHARVHKKDHHSYRGLMKKVGHRRNLLAYLRKTDVQRYRELIKRLGLRR
59	AMQ96516.1	xpaC	5-bromo-4-chloroindolyl phosphate hydrolysis protein	0.2571	25633	6.01	Membrane	220	MIKRNWPWLLALVLLFLFVRNNSFSFVLGLLLIGVVLVLWGLFGSRRKKGKQEEIPALTDELETHYEKSGMTANEISFFRQTMNQTKNEINQLQMNMQQTAKLKAIDLRHDPVKAAKALFKELVKEPNRLHEASQFLYTHLPNLVDLTNKYNEINDHEIKNKQTYEKLEESAQIIDQLSALIAQDYQKFVAEDLDDIDVEISVAKQSLKRDNKYEPEQKD
60	AMQ97141.1	gpsB	cell division protein DivIVA	0.2541	15792	5.09	Cytoplasmic	139	MANLVYSPKDILQQEFKTKMRGYDPVEVDEFLDNIIKDYETYSKELLALQEENDRLSAKVAQLSKTQGAAQTRVQQTEAPKSAAVTNFDILKRLSNLEREVFGKKLDQQASAVKPAQPNPNNYTNADTSLDDNEKTRQF
61	AMQ97982.1	msmK	sugar ABC transporter ATP-binding protein	0.2486	41154	6.23	Cytoplasmic	369	MVEMALKNVYKKYDNAENYSVTDFNLSIKDREFIVFVGPSGCGKSTTLRMIAGLEDISEGELNIGGKVMNDVAPKDRDIAMVFQNYALYPHMTVFDNMAFGLKLRKYDKADIKKRVDNAAEILGLTEYLKRKPAALSGGQRQRVALGRAIVRDAKVFLMDEPLSNLDAKLRVAMRAEIAKLHQRLETTTIYVTHDQTEAMTMADRIVIMKDGFIQQIGTPKEVYDTPVNMFVAGFIGSPAMNFFNVTLKNGVITDGHGLKLRIPEGKNKVLVEKGYEGKEVIFGIRPEDIHSEQVALEASPEAVVKSEVVVSELLGAETMLYTKTGSTEFISKVDARDFHKPGEIVDLAFNISKGHFFDKETEQVIKLP
62	AMQ96843.1	fabG	beta-ketoacyl-ACP reductase	0.2478	26114	7.67	Cytoplasmic	245	MDVKGKNVFITGSTRGIGKAMALAFAKAGANIILNGRGEIPKEKIEEIEAFGVKCVGVSGDISDYEKAGQMIKEAEEKLGSIHVLVNNAGITNDKLVMRMDAEDFKKCLDINLIGTFNMTQHVLKKMMKQREGAIINLSSVSGLIGNIGQANYAASKAGVVGLTKSVAREAATRGITCNAIAPGFITTDMTEVLADKVKEQAEKQIPMQRFGQVEDIAQTAVFLAQNPYITGQVINVDGGLVMHG
63	AMQ97217.1	AS238_03415	hypothetical protein AX771_06615	0.2381	14556	6.59	Membrane	130	MKKIIYSLLAMSVSILILTSCSTTYTQSASNQKEEVKTSQKATITLQENGQNFSEKEVVFKKGDDLLSILKRNFEVKEDNGFITSLEGHSQDEKNQLYWMFTVDGKSATTGAKEIKLNDGQSVIFNLSKL
64	AMQ98300.1	prs	ribose-phosphate pyrophosphokinase	0.2359	35251	8.66	Cytoplasmic	323	MSKHYFDPRLKIFALNSNRPLAEKIAAAVGVELGKSSVTQFSDGEIQVNIEESIRGSHVYVIQSTSSPVNDNLMELLIMIDALKRASAKTINVVMPYYGYARQDRKARAREPITAKLVANMIQKAGATRMLTLDLHAVQIQGFFDIPVDHLMGAPLIANYFLEKGIKGDDVVVVSPDHGGVTRARKLAEFLKSPIAIIDKRRPKANVAEVMNIIGQVKGKTCVLIDDMIDTAGTITLAANALKEAGATSVYASCTHPVLSGPALQRIEDSAIERLVVTDSIYLPEDRKIDKIDEVSVGGLMGDAIKRIHENKPVSPLFETKNK
65	AMQ97180.1	msrR	Cro/Cl family transcriptional regulator	0.233	44170	9.53	Cytoplasmic	387	MSRMDRYKDIHKKAKPLKRDTGSIFARRERKRTRMENEEDATRIYEREQHSFEHLNQYEQQIYRDAPRAEEQQKNKKFFNRQKKNKPLKPRRKRSWKKIILSILLVLILYSGISFFIGKYVAEHDTSLEAATSETFHGQKATNGAHNILILGSDTRGEDAGRADTIMVLQLDGPSHKPKLISFMRDSFVTIPGVGQNKINSAYAYGGADLVRQTLVENFGIDCQYYAKVDFKSFEKVIDALFMNGVKIDAEKDLNLDGVDIKKGVQKMDGHVLLQYARFRMDEQGDFGRVRRQQQVMNAIFSQLKNPLNLIRAPYAAGKALGYTSTDVTAWFLTKNLFSIARGAGGIDRISVPVDGSWNYGQSDYAGSILEIDNQMNQSAITDFLNK
66	AMQ98797.1	ermB	SAM-dependent methyltransferase (plasmid)	0.2296	28751	9.8	Cytoplasmic	245	MNKNIKYSQNFLTSEKVLNQIIKQLNLKETDTVYEIGTGKGHLTTKLAKISKQVTSIELDSHLFNLSSEKLKLNIRVTLIHQDILQFQFPNKQRYKIVGSIPYHLSTQIIKKVVFESHASDIYLIVEEGFYKRTLDIHRTLGLLLHTQVSIQQLLKLPAECFHPKPKVNSVLIKLTRHTTDVPDKYWKLYTYFVSKWVNREYRQLFTKNQFHQAMKHAKVNNLSTVTYEQVLSIFNSYLLFNGRK
67	AMQ97111.1	fabI	enoyl-ACP reductase	0.2224	25668	5.19	Membrane	240	MGVANKKSIAWGCAEAMLKQGAEIIYTYQNERMKKSLVKLVGEEAFTVECDVSSDESIEKAMNAIGEYAGEIHGLVHAVAYANKEELSGNVSDISRDGYQLAQDISSYSLIAVSKYAQPFLAPNSGIVSMTYLGSERAIPNYNMMGIAKASLEAAIRYLAAEFSPKGIRVNGISAGAIKTLAVTGVKDYQKLIQLSESRTPDQQGVTIEEVGNACAFLISPLSSGIIGDIIYVDKGVHLS
68	AMQ97452.1	AS238_11750	sulfurtransferase	0.2203	15062	9.78	Membrane	131	MVLWVINIILLLIVLAIILWEVYLRVMAKRSATTLTEEEFREGMRKAQVIDVREKDVFDAGHILGARNIPYTVLKDSLGSIRKDQPVYIYDQKKSLSIRTANKLRKAGYQEIYLLKGGYDGWSGKIKSKKV
69	AMQ98284.1	mreC	rod shape-determining protein MreC	0.2174	31308	5.3	Membrane	284	MKKFNPNKNIIITLVIVIIVVTILSVTAAQRANEGKPNFFQSIVNDSVAMVDKTISAPVRWVRNGVASVHNLFSTYAENERLKEKIDSYDDVSQQNKNYEREIEALKKELELNQTLTSYEKVTANVITRSPDSWQDMLIVDKGSKDGIEANMAVMSQKGLIGRVIEVNTASSKIELLSSSNESSNHFPVRVSSANGEAFGLLKNYDEKLHALVVTQLTGDTDIKEGDVVQTSGLGGNSPANLPIGTVIKTKPDSYGLDREVYVKPYAEMYDVSVVTIVQRLAED
70	AMQ96150.1	rplD	50S ribosomal protein L4	0.2136	22530	9.99	Cytoplasmic	207	MPNVALFKQDGSQNGEITLNEEIFGIEPNESVVYDAIVMQRASLRQGTHAVKNRSAVRGGGRKPWRQKGTGRARQGSIRSPQWRGGGVVFGPTPRSYSYKLPKKVRRLAMKSVLSEKVAENNLVAIEGLNFDAPKTKEFKQVLANLSIDSKVLVVLEKGNDFAALSARNLPNVSVVTSDNVSVLDVVSNTKVLATQTALTQIEEVLA
71	AMQ98432.1	AS238_00635	FMN-binding protein	0.2102	33664	4.67	Membrane	311	MKKKRFVTGFAVLAFSALVLGACGADDNGSSNSSSESSTAQSSTAKSTTESSAKVVAGGDLQDGTYKLEEKNYSNGYRAVFEMVVKDGKITESKYDNVNENGESKTKDAEYNKNMEAKSGTNPEKYIPELNDQFLKAQSASGVEVVTGATHSSESFQNYAQQLIQAAQAGNTDTIEIDNGADLKDGTYKLEEKNYSNGYRVQFEMTVAGGKVTESNFDYIDKDGKSKQDDTEYNENMKAKSGTEPKTYIPTLNDEFVKAMGEEDGSPANVEVVTGATHSSHSFIMYAQQLVNAAEKGDTQTIEVDNIVTEK
72	AMQ96976.1	A5836_002410	lipase	0.2072	33806	5.29	Cytoplasmic	298	MKLTKRHLILVLFPLLIAIIIYAGLAASIPKAGPLMKPVTTVREDPNKKEKLHYIAIGDSLTEGVGDQTKQGGFVPLVANDLKDRYNLTAVETENYGVNGERSDQILKRVKTKEEIRNNIKTADFITLTVGGNDLMKVIQNNLFGLTVNSFKKPLKNYQENVTELLEEFRSLNKTAPIYILGIYNPFYLNFPEITDMQTIVNNWNKGTETVTKKMPNCYFIPINDLLYQGLNQEVGVTEEGTDQTTSTTENLNGIKNNVLYEEDHFHPNNLGYQLMANAVRDQLIETQNQWLEKEDDQ
73	AMQ96868.1	pfkA	ATP-dependent 6-phosphofructokinase	0.203	34191	5.34	Cytoplasmic	320	MKRIGILTSGGDAPGMNAAVRAVVRKGIYEGLEVYGINYGFAGLVAGDIRRLDVADVGDKIQRGGTFLYSARYPEFATEEGQLKGIEQLKKFGIEGLVVIGGDGSYHGAMALTKRGFPAVGIPGTIDNDIPGTDFTIGFDTAINTVLESIDRIRDTATSHVRTFVIEVMGRNAGDIALWSGVAGGADEIIIPEHDFDMASVAKKIQEGRDRGKKHCLIILAEGVMGGNEFAEKLSEFGDYHTRVSILGHVVRGGAPSARDRVLASKFGAYAVELLQEGKGGLCVGIHDNEIVASDIIDTLENNKHKPDLSLYDLNNSLSF
74	AMQ96158.1	rpsQ	30S ribosomal protein S17	0.2013	10245	9.93	Cytoplasmic	88	MTEGRNQRKVYQGRVVSDKMDKTITVAVETKKNHPIYGKRMNYSKKYKVHDENNTAKVGDIVRIMETRPLSATKRFRLLEVVEEAVII
75	AMQ96709.1	ftsZ	cell division protein FtsZ	0.195	44306	4.69	Cytoplasmic	413	MEFSIDNNINDGAVIKVIGVGGGGGNAVNRMIEENVKGVEFITANTDVQALKNSKAETVIQLGPKYTRGLGAGSQPEVGQKAAEESEQSLREALDGADMIFITAGMGGGTGTGAAPIVAGIAKELGALTVGVVTRPFTFEGPKRGRFAAEGIARLKENVDTLLIISNNRLLEVVDKKTPMLEAFREADNVLRQGVQGISDLITAPGYVNLDFADVKTVMENQGTALMGIGVASGEDRVVEATKKAISSPLLETSIDGAEQVLLNITGGLDMTLFEAQDASDIVANAATGDVNIILGTSINEEMGDEIRVTVIATGIDESKKERKSSRPARQAQMQSPAQKTVLDMDQAKPTSSEEENSFGDWDIRREQNVRPRVDDSNFDNIEKKEFDTFNREETKSHG…
76	AMQ96685.1	rpmA	50S ribosomal protein L27	0.1933	10421	10.28	Cytoplasmic	97	MLLSMNLQLFAHKKGGGSTSNGRDSESKRLGAKRADGQTVTGGSILYRQRGTKIYPGVNVGIGGDDTLFAKVDGVVRFERKGRNKKQVSVYPVAQEA
77	AMQ97460.1	feuA	ferrichrome ABC transporter substrate-binding protein	0.1925	35070	4.86	Membrane	318	MKLKTKVFTLSSILLLAGVLSACSPSSDKETATTANSTTSSNSTHTVTDTLGHKVEIPNAPKRIIGSYLEDYLIALGEKPIAQWTVGSGSIQDYLQDDLKDVPTISYDLPYEKVLSFEPDLLLISSSATVEGGKYEQYSKIAPTYVVKNGTDVTWEEQLKDVGKALAKEKEAEKIISDYQKSIKKTREELADKIENKTAAVLWVTNNSAFMVSKNRSSGRIVYDDLEFGVPDLVEEVSKKATSDWSAVSSEKLAELDADYIILVNSDKDAAMFNEPSWKNLKAVTDNHVLQFGPESSWLYNGPIASQEMVNDIKEKLN
78	AMQ96437.1	macB	bacitracin ABC transporter ATP-binding protein	0.1908	27619	6.23	Cytoplasmic	250	MNKIVEVQNVTKVYGKNNEKKTQALSGISFDVEKGEFIGIMGASGSGKSTLLNILSTLDKPTDGHIRINQKDVTTLKGNQLADFRANEIGFIFQDFNLLESLTAQENIAVPLSLQGVRPKEIKQRVQKIAERLSISHILESYPSEISGGQKQRVAAARALITQPTILLGDEPTGALDSKSARDLLDTMDELNTKDHVSILLVTHDPFSASYCQRILFIKDGGIHQEVKRGDQSRDSFYREILSILGNLEQ
79	AMQ96176.1	rplQ	50S ribosomal protein L17	0.1904	14306	9.97	Cytoplasmic	126	MSYRKLGRTSSQRKAMLRDLTTDLLINERIVTTEARAKEVRSTAEKMITLGKRGDLHARRQAAAFVRNEVASVREENEDIVIESALQKLFNDIAPRYAERQGGYTRILKTEPRRGDGAPMVVLELV
80	AMQ96560.1	prsA	peptidylprolyl isomerase	0.1899	33391	5.19	Membrane	303	MKKRFLALAIVLGTGLLSGCTNAGEKTAVSYKGGTISEQEVMDSLKKMQGADSAVQQLIVYQVFEDKYGDDVSTKEIDSQYDQTKKQLGDSFDSQLKSAGYTEQTFKDSIKQSLAFQEGLKKHIKLTDEDLKTAWESFHPEVEAQIIQVASEDDAKDVKKAADKGDDFSKLAKDKSTDTTTKEDGGKVKFDSTTTTVPAEVKEAAFKLKDGQVSDVITSTNASTYTTEYYVVKMVKNQNKGNDMDKYKKELKEIATDTKLSDSTFQNKVIGEVLKDANVKIKDKDFENVLSTFTSDSSTASSK
81	AMQ97103.1	peb1A	glutamine ABC transporter substrate-binding protein	0.1878	29802	5.13	Membrane	271	MRRLKKIRLIFLLGIAFLALAGCKGNGLANEDILERSKSTNEIIWGVKYDTRLFGMMDIESRTVQGFDVDIAKAITKKILGDNGKTEFVEVTSKTRIPLLKNGNIDAIIATMTITDERKKQVDFSDVYFDAGQALLVKKGSQIKSVDDLNASTTVLAVKGSTSAANIRQHAPDAKILELENYAEAFTALQSGQGDAMTTDNAILLGIADENPEYELVGGTFTNEPYGIAINKGQENFLKAVNQALEEMHADGTYDKIYQKWFPNETEGKVE
82	AMQ98633.1	AWT83_15985	hypothetical protein AX771_14680 (plasmid)	0.1866	24119	5.16	Extracellular	214	MENKTLKIVLTAAISVSLIGNIALFWQLKEEQATNTYKIEEVAKNASEKLKKNSSSAQAKIDKLNQTINEKNQEIDQLKQQDGTKAKEEVNEAQSKTAEEFGKLAIDKSLSRNELTEKLKDVATQEVIDKLSPADDDHQHDDYGSYSFTLGDVQTYAQTSSVKEEQNFVVFVDYTIGNPQFKDVKPQKIKGGLTVTEKQVDGQWKVTDFSYFTR
83	AMQ97376.1	engB	GTP-binding protein	0.1861	22146	9.34	Cytoplasmic	195	MKVHQAEIIISAVAPKQYPDTQLPEIALAGRSNVGKSSFINTLIDRKNLARTSGKPGKTQTLNFYLIENALHFVDVPGYGYAKVSKTERAKWGKMIETYLTTRDQLRAVVSLVDLRHKPSQEDIQMYQFLKYYDIPVIVVATKADKIPRGKWNKHESEIKKALDFDRNDTFILFSSVTKQGKEEAWAAIEQAIES
84	AMQ96135.1	yufO	heme ABC transporter ATP-binding protein	0.1819	57478	5.88	Cytoplasmic	520	MVQENIVIEMQNITKEFGTFKANDNINLQVKAGEIHALLGENGAGKSTLMNVLSGLLEPTSGKILMRGKEVKITSPTKANQLGIGMVHQHFMLVDAFTVTENIVLGSEPSRAGMLDHKKARKEIQKVSEQYGLSVNPDAYVRDISVGMEQRVEILKTLYRGADVLIFDEPTAVLTPQEIDELIVIMKELVKEGKSIILITHKLDEIKAVADRCTVIRRGKGIGTVNVKDVTSQQLADMMVGRTVSFKTMKKEAKPQEVVLSIENLVVKENRGLEAVKNLNLEVRAGEVLGIAGIDGNGQSELIQALTGLRKAESGHIKLKGEDITNKKPRKITEHGVGHVPEDRHKYGLVLDMTLSENIALQTYHQKPYSKNGMLNYSVMNEHARELIEEYDVRTTNEL…
85	AMQ96821.1	lytR	LytR family transcriptional regulator	0.1815	45793	4.56	Cytoplasmic	408	MKRWQKVLLTLLGVFVLLIAGLSAYGIRFMGEASQTVNKISKNSNRISSKRSERVSIDDKEPFSVLLLGLDTGGLGRTEQGRSDTMMVVTVNPKQKKSTIISLDRDIYTNIVGYGTVDKLNHAYAFGGVEMAMDSIEQLLDIPIDHYVTINLDGMEDLINAVGGIKVNNKIDFTLDGVHVPVGEQTLNGEKGLAYSRMRHEDPEGDIGRQRRQREVVTKIVNKVLSLDGVSNYRKILKAVENNVTTDLDWDDMLDVATNYTPAFETIKQDQLQGEGQMINDIYYQILGKNDLLSIQNELKKQLNIKTSDTLPNLKNENASMMFFDDSEDGDSTNGDGSNSEGYTDYSSYSENTYDQYQDPNTYYQQTEDTSQYYTPSQDTQSYDPYAGQEQNGYGYDQN…
86	AMQ96439.1	AS238_04650	N-acetylmuramoyl-L-alanine amidase	0.1735	76828	4.87	Extracellular	714	MKNKKTIRLLAATWLIAPSVLSTNTVFAVDNQIADQTVTTDTTTSSSATSETTDSFTEDPTGTTNSTTGSTEPTEIDPADPSENEKPAETYSLTIAPSLIGKIQLTASTADSPEQQPLDITESGTVEGLLAETKVTYTITPAEGEQIASVAVNGAKEVNYDAKTFTVGTNNLSITAEFKAGPDTSTEKPTDPSEEVPSTPDPETPNKPDVGNNNNNNGSNNSNNNNNNSNSGNSSNQTNPSGSNNNGNTQREPNHPNNGSSNGGTNNASSRPNTANQSGIENPSSASSDFVVKSPIDAVLPTNTTNVQQAIVREAFKHLGKPYVWGAKGPNTFDCSGLTYYVYMKATGHYIGGWTGEQQYAGTQIPVSQAQPGDLVFWGPSSGVTHHVGIYIGNGQFIH…
87	AMQ96541.1	metQ	methionine ABC transporter substrate-binding protein	0.1735	30966	4.78	Membrane	282	MKKKIFGFAAALLLTVGLAACGNNSDSKDSANKADDTTLKVGASPTPHAEILEHVKPLLKDEGIDLEIVKFDDYVLPNQSLEEGDIDANYFQHIPYLNKEIKEKGYDFVNAGAVHIEPMGLYSKKVKDVSELKDGATIITSNSESDWGRIITILQDAGLVKVKDGVDLETATFDDIEENPKNLKFNHTIDPSLLASTYQNDEGDLVAINANFAYGAGLNPLEDAVLLEKDNSPYVNIIATRKGDEDSDKIKKLIEVLHRKEVQEWITDKWGGSVKPVKADAK
88	AMQ97765.1	atpD	ATP synthase subunit beta	0.1722	51022	4.66	Cytoplasmic	468	MSSGKIVQVIGPVVDVEFSLDQSLPDINNALVVYKNDENKSKVVLEAALELGDGVIRTIAMESTDGLQRGMEVIDTGKAISVPVGKETLGRVFNVLGDTIDLETPFPEDAERSEIHKKAPAFDELSTSTEILETGIKVIDLLAPYLKGGKVGLFGGAGVGKTVLIQELIHNIAQEHGGISVFTGVGERTREGNDLYYEMKDSGVIEKTAMVFGQMNEPPGARMRVALTGLTIAEYFRDVEGQDVLLFIDNIFRFTQAGSEVSALLGRMPSAVGYQPTLATEMGQLQERITSTKKGSITSIQAIYVPADDYTDPAPATAFAHLDATTNLERKLTEQGIYPAVDPLASSSSALAPEIVGEEHYKVATEVQHVLQRYRELQDIIAILGMDELSDQEKVLVSR…
89	AMQ98821.1	vanA	D-alanine--D-alanine ligase (plasmid)	0.1693	37391	5.79	Cytoplasmic	343	MNRIKVAILFGGCSEEHDVSVKSAIEIAANINKEKYEPLYIGITKSGVWKMCEKPCAEWENDNCYSAVLSPDKKMHGLLVKKNHEYEINHVDVAFSALHGKSGEDGSIQGLFELSGIPFVGCDIQSSAICMDKSLTYIVAKNAGIATPAFWVINKDDRPVAATFTYPVFVKPARSGSSFGVKKVNSADELDYAIESARQYDSKILIEQAVSGCEVGCAVLGNSAALAVGEVDQIRLQYGIFRIHQEVEPEKGSENAVITVPADLSAEERGRIQETAKKIYKALGCRGLARVDMFLQDNGRIVLNEVNTLPGFTSYSRYPRMMAAAGIALPELIDRLIVLALKG
90	AMQ98400.1	AS238_11210	manganese ABC transporter substrate-binding protein	0.1671	35626	5.29	Membrane	316	MMRKWKAVLGSLGILIALFIFGACSTNSKDKDTVASNEKLKVVVTNSILADITENIAKDKIDLHSIVPIGKDPHEYEPLPEDVQKTSKADLIFYNGVNLETGGNAWFTKLVKNANKEENKDYFAASDGIDVIYLEGQSEKGKEDPHAWLNLENGIIYAKNIEKQLAEKDPDNKKFYKENLDKYIEKLDSLDKEAKSKFASIPNDKKMIVTSEGCFKYFSKAYNVPSAYIWEINTEEEGTPDQIKHLVEKLRTTKVPSLFVESSVDDRPMKTVSKDTNIPIYSTIFTDSIAEKGQDGDSYYAMMKWNLDKIAEGLSK
91	AMQ98441.1	HMPREF0351_12691	hypothetical protein AX771_14085	0.1663	25583	9.6	Membrane	231	MEPEQLRAIVKENNSLETKLTKRNQQYIFDLKKSLEAANLSEEEKVKALHDILPTLVAEQKGGRTARQLFGTVSERTEAIINKPAEVKNSSTPLLMWLDNTLLLLGLLSIMIAITGLFSRGTTPAYGFSTLVLGSAIGGWVFYMMYKYIYQYEYPGADRSKKPGMGKTLLILGGTTLLWVVLFSATTLLTPVINPVLDPVVVIIIGATALAIRYYLKKKYGIIGSLSVPRR
92	AMQ96186.1	oppF	peptide ABC transporter substrate-binding protein	0.1659	35720	9.15	Membrane	314	MTELITIKDLKVHYPIRSGFFNRVTDHVYAVDGVDFIIEKGKTYGLVGESGSGKSTTGKAVVGLEKVTAGQIMYEGKDVTKRSNRKKMGYNKDVQMIFQDSMSSLNPKKRVLDIIAEPIRNFERLSDQEEKKKVKGLLDIVGMPEDALYKYPHEFSGGQRQRLGVARAVATNPKLIVADEPVSALDLSVQAQVLNFMKRIQQEYGLSYLFISHDLGVVKHMCDNIAIMYKGRFVEIGTREDIYNDPRHIYTKRLLSAIPQIDVENRESHKENRRRVEQEYIQNQKEYYDATGRVYDLRTITTTHKVALKDGGAS
93	AMQ97801.1	atpB	ATP synthase subunit B	0.1595	51058	5.15	Cytoplasmic	458	MIKEYRTIGEVVGPLMAVEKVAGVKYEELIEVRMQNGEIRRGQVLEVQEDKAMVQIFEGTSGINLRDSSVRFLGHPLELGVSEDMIGRVFDGLGRPKDNGPEILPEKHLDINGEVINPVARDYPDEFIQTGISAIDHLNTLVRGQKLPVFSGSGLPHKELAAQIARQATVLDSSDDFAVVFAAIGITFEEAEFFMEDFRQTGAIDRSVMFMNLANDPAIERIATPRMALTAAEYLAYEKGMHVLVIMTDMTNYAEALREISAARREVPGRRGYPGYLYTNLATLFERAGRIRGLKGSVTQIPILTMPEDDKTHPIPDLTGYITEGQIILTRELYKSGIQPPIDVLPSLSRLKDKGTGPGKTREDHAATMNQLFAAYAQGKQAKELAVVLGESALSDVDK…
94	AMQ96156.1	rplP	50S ribosomal protein L16	0.1524	16135	10.44	Cytoplasmic	144	MLVPKRVKHRREFRGKMRGEAKGGKEVAFGEYGLQAVDSHWITNRQIEAARIAMTRYMKRGGKVWIKIFPHKSYTAKAIGVRMGSGKGAPEGWVAPVKRGKIMFEIAGVPEEVAREALRLASHKLPMKTKIVKREEMGGESNEG
95	AMQ98100.1	CUS93_13650	replication protein	0.152	33208	8.94	Cytoplasmic	283	MADNKRYYYLKLKENFFDSDEMVLLESMPDGYIYSNILLKLYLRSLKHEGKLMFNDRIPFNSTMLATITRHSVGVVEKAVQIFRDLQLIEVLDNGAIYMSDIQSFIGKSSTEADRKRKYRKEIEEAKQNLITSGQMSDKCPDKTTPELEIELEKDIELEKDIENVTPPKKSKAKPIRHKYGEYKNVLLSDEQMEKLKTEFPNDYQERIERLSEYCESSGKTYKNYLATIRSWARKEKSEPKNASGAYKRTGRREKLPEWAIDQEAYQKKKALERANRQSKAPF
96	AMQ96184.1	plsX	phosphate acyltransferase	0.1486	35744	6.15	Cytoplasmic	333	MKIAVDAMGGDHAPQAIVEGVALAQQDFPEVEFLLYGKEAEIKKYLTNEKNITIIHTDEKINSDDEPVKAIRRKKTASMVLAAQAVKNGEADAVFSAGNTGALLAAGLFIVGRIKNIERPGLMSTLPVVGKEGAGFDMLDLGANAENKPEHLLQYGILGSFYARKVRGIGRPRVALLNNGTEATKGSEVTKKAYELLQNETSLNFIGNVEARELLNGVADVVVTDGFTGNAVLKSIEGTAMNMMNLLKSAILNEGIKGKMGAMLLKDGLRSLKAEMDYSKHGGAVLFGLKAPVIKTHGATGPDAVRYTIRQIHTMLETDVVGQLVEQFEKSEE
97	AMQ98283.1	sagA	hypothetical protein AX771_13110	0.1465	55461	4.41	Extracellular	524	MKKSLISAVMVCSMTLTAVASPIAAAADDFDSQIQQQDQKIADLKNQQADAQSQIDALESQVSEINTQAQDLLAKQDTLRQESAQLVKDIADLQERIEKREDTIQKQAREAQVSNTSSNYIDAVLNADSLADAIGRVQAMTTMVKANNDLMEQQKQDKKAVEDKKAENDAKLKELAENQAALESQKGDLLSKQADLNVLKTSLAAEQATAEDKKADLNRQKAEAEAEQARIREQQRLAEQARQQAAQEKAEKEAREQAEAEAQATQASSTAQSSATEESSATQSSMTEESSSATQSSATEESTTPESSTEESTAPESSATEESTTAPESSATEESTTVPESSATEESTTVPESSTTEESTTPAPTTPSTDQSVDTGNGTGSSTPAPTPTPTPEQPKPVT…
98	AMQ96740.1	AS238_14015	hypothetical protein AX771_03765	0.146	29540	9.51	Extracellular	249	MTEHRSYYAIIPANVRYDKRLKPNTKLLYGEITALCNERGFCWAGNEYFADLYGVNKETISRWVSDLIKFGYLNREIIYKEGTNQIINRYLRINQYPIDEKRNTPIDEKVKDNNTSINNTFNNTKEYIRELPPSKKSKAKPVRHKYGEYKNVLLSDEQMEKLKTEFPNDYQERIERLSEYCESSGKTYKNYLATIRSWARKEKSEPKNASSGYKRTGRREKLPEWAIDQEAYLKKKALERANRQSKAPF
99	AMQ97138.1	ponA	penicillin-binding protein	0.1444	86528	5.03	Membrane	793	MANEQTRSSRRQKQPTPKKSVKKNSGKGSGKSSGTHKKGLFIKILLGILSFFCILFLAGVGLFWYYAKDAPELTDKKLDATVSSKLYTQDGELFEDLGAEKREKISANELPKTLEDAIVSVEDRRFYKHIGVDPIRIIGSALSNFTSGGLQGGSTLTQQLIKLSFFSTSAEDQTLKRKAQEAWMAVRLEQKKSKQEILTYYVNKVYMSNGLYGMETASEMYFGKKLSELSLPQTALLAGMPQAPSAYDPYVYPDQAKKRRDTVLYTMLQNEKISQTEYDQAVNVPVTDGLQELTQSDDNTKIVDNYVKEVINEVQEKTDKNVYTDGLEIYTNLDLDAQKKLYDIVNTDQYVSYPDDEMQVASTLIDTNTGKVKAQIGGRHIAEDVTLGNNLAVNTSRDF…
100	AMQ98433.1	apbE	thiamine biosynthesis protein ApbE	0.1431	40856	5.3	Cytoplasmic	367	MRKKLLFSLITLGISFMVLTGCSNSANKTTTESSAATKILKDPYSDEQFLLGTYVRIRVYDEGKESTLKPAFDRVKELGDKITINQKGSEIDEVNEQAGIKPVKVSDDVYTLVKRAYEYSQDSQGGFDMAIGAITQLWRIGFDDARKPSQEEIDQALKLVDYHKIELNDKEKTVYLKEKGMIIDLGAIAKGYITDEVVKVLKKQGVTTAIVDLGGNVYVLGHSPRGENQDWTVGIQDPNMARGSVLGSIKERNKTLVTSGIYERYLEVDGKKYHHLFDPKTGYPFDNDIASVTIITDKSIDGDGLSTAVFSMGVKKGLEYVESELNNGTEAIFVTKDDKVYVTDPIKDTFKLSEDSHYTMGDRSELK
101	AMQ97878.1	rnj	ribonuclease J	0.141	61105	5.67	Cytoplasmic	559	MKLSIKNNETGVFAIGGLGEIGKNTYGVQFQDEIILIDAGIKFPEDDLLGIDYVIPDYSYIIQNLHKVKALVITHGHEDHIGGIPYLLKQANIPIYAGPLALALITNKLDEHGLLRDAELHEINEDTIIRFRKTSVSFFRTTHSIPDALGIVVKTPSGNIVATGDFKFDFTPVGEPANLHKMARIGEEGVLCLLSDSTNAEIPTFTKSEKTIGHSILKIFSKIEGRIIFASFASNIFRLQQAADAAVATGRKIAVFGRSMENAIVNGQRLGYIKVPDGTFVDAHEINRLPANETMILCTGSQGEAMAALSRIANGTHRQIQIQPDDTVIFSSSPIPGNTTSVNHLINLLSEAGAEVIHGKINNIHTSGHGGQEEQKLMLRLMKPKYFIPVHGEFRMLKV…
102	AMQ97230.1	AS238_03490	lysis protein	0.1401	23480	4.4	Extracellular	215	MKKTVIYTSLFAALFLAACQSNTNQGTSGNTSSSSEQRSSQVSDSSTKASTSSSSQTKSSSEASTQSDIKVSAARAIELFQDKYPDTAITSLELDSDWGSYFYKIEGVDDQKEYEARIDAQNEKMETENPETLDRDEQNGQKKKEDGLDVDKLITIEEAAKIAVDKVGSGTATDWDLDKDLGTTYWEVKVKDGNQSTSVKINSQTGEVLSTEQDD
103	AMQ98419.1	rpoC	DNA-directed RNA polymerase subunit beta~	0.1401	136798	6.54	Cytoplasmic	1217	MIDVNKFESMQIGLASPEKIRSWSYGEVKKPETINYRTLKPEREGLFCERIFGPTKDWECACGKYKRIRYKGIVCDRCGVEVTRSKVRRERMGHIELAAPVSHIWYFKGIPSRMGLVLDMSPRALEEIIYFASYVVIEPGNTNLEKKQLLTEREYREKREQYGQEFQAAMGAEAIKQLLDNVDLDAEAAELKEELKSAQGQKRTRAIRRLDILEAFRASGNQPSWMVMDVIPVIPPDLRPMVQLEGGRFATSDLNDLYRRVINRNNRLKRLLDLNAPGIIVQNEKRMLQEAVDALIDNGRRGRPVTGPGNRPLKSLSHMLKGKQGRFRQNLLGKRVDYSGRSVIVVGPFLKMYQCGLPKEMAIELFKPFVMRELVQRELASNIKNAKRKIERQEDEVWD…
104	AMQ97116.1	AS238_08440	alpha/beta hydrolase	0.1368	35084	5.55	Membrane	311	MKLWMKILLGVALALIVALVFAGNYFYNYAVVPSEKDFLDEDTPGTTQTSKETDAHKWFSSKENRSDWTITSKDGLKLSAIYLPAETKSEKTALVAHGYMGNAETMTNYAKMFHDMGYNVLVPDARGHGKSEGDYIGFGWPERKDYVQWINKVLENNGKSQEIVLYGVSMGAATVMMTSGEKLPDNVKAIIEDCGYSSVHDELAYQLDDMFSLPAFPLMQVTSLVTKVRAGYFFGEANAVEQLKKNQRPMLFIHGDEDTFVPFEMLDKVYRATKGPKEKYVVKGAEHAEAYKTDPEKYQQVVQQFLSQYVH
105	AMQ98102.1	HMPREF1359_02615	topoisomerase	0.1359	28405	5.52	Cytoplasmic	244	MSEGTKRNDNKLFNSLYKITVNDVVEKRNKLTYLSWAWAWAEVSKICEEVDYEIYRDPETHRPYLFDEKTGYMVFTSITVNGVKRDMWLPVMDGANKAMKDKPYTYEVNDYQWNNETKKKEIVGKIEKRVEAATMFDINKTIMRCLVKNLAMFGLGLYIFAGEDMPEDVSMLEPATQRSKKLFLDALQLVANKYDKSIDEAIVALTDAASITADDSKWTKRDLGILKRGVNWLEDQYREETKEK
106	AMQ98337.1	AS238_11495	mannosyl-glycoprotein endo-beta-N-acetylglucosamidase	0.1346	46765	4.79	Membrane	422	MKAKNLLFSVILLGNLAVANTTVLAEESTETVATQTSSSSETGIENDTESTLQSATVSENTISTEEPTTETTEQTQTEDSTSAEAQNNPENAEEITNQLTDGQTLTHTHQADLSEFENYTGYAFYARSSANSQQAFIDSIASTAQSLASANDLYASVMIAQAIVESGWGNSTLASAPNYNLFGIKGSYNGQSVTMPTSEYVNGQWITVNAAFRKYPSYKESLQDNVTVLKTTSFQPGVYYYSGAWKSNTNSYKDATAWLTGRYATAPNYGSTLNNVIETYNLTQYDTAPTSTSPMYRLYNRHTGEHLYTLNAGEKNYLPTVGWEYEGIAWQAPNSGQPVYRLYNPYSGDHHYTMAQSEINSLTKIGWRYEGLSFYSGGSKPIYRLFNPNEKTGTHHYTL…
107	AMQ96842.1	fabD	ACP S-malonyltransferase	0.1325	33399	5.15	Cytoplasmic	305	MKTAFLFSGQGAQYQGMGKDLYEEAVVKQTFDEASEILGYDMAELCFTENERLDQTQYTQPAILTVSIAYYRLLKEHGIIPDAALGLSLGEYSALVASNALSFTEAVALVAKRGAYMTEATPAGSGKMVAVMNAPIETIEESCHEASKYGIVSPANYNTPQQIVIGGEEKAVDEAVLLLKEKGFKRMIPLNVSGPFHTAILEPAAKKLAKDLSQIQFSEPSFPIISNTTTEIMKKETIAGLLEQQVMQPVRFYESIHKLKTIGIEQVIEVGPGKVLSGFMKKIDKTIPVLRVENKQTFDETIAIL
108	AMQ97703.1	HMPREF1359_01862	hypothetical protein AX771_09520	0.1313	28970	5.23	Cytoplasmic	259	MEKPFVKSLTAVAVGAGAIAICLFGYHINNQRQHQQRINYAESAITNQKDTLTSLSKEVDKLYSTKEKIFLNPEITEETITSLSNKLSSVKLSADDYDIKESELPKEAVAIQDEKKAIVTQLDSAESKLKIQTAVNDLFTKNVSNWQQAVDDVIIKEKVTSADVARVRENMSFFKDSPWKTVVMQYLGFADTQIAQVTQLDQLFDTMLKDGQVTATATYDQYLTALSQIEQIRNEKISAAYATKAQTVAQQMGYSNISY
109	AMQ96764.1	tsh	phage tail protein	0.1313	22138	4.88	Cytoplasmic	202	MAKTKTVVTTFDNVSIKRIAFNFKNAGNAIATNCNGQLDGETEMQTVVKKCGATEVKSKSKPINMTVTITAHVPMEVYRRFNGLKQDGRIKPGIYSYGPDSVGEDFSLAAEIVDDFEENRKLVGMLACTSNTGLTFSIENGADEVAALELETKVMQDEFGKFYHEAIVAELEEDLTDQWMTNLSADVIKKTSVVTTTATQSQ
110	AMQ96790.1	rmlB	dTDP-glucose 4,6-dehydratase	0.13	38447	5.2	Cytoplasmic	342	MKNIIVTGGAGFIGSNFVHYVVNNHPEVHVTVLDKLTYAGNKENLAGLPSDRVELVVGDVADAELVDRLVKEADAVVHYAAESHNDNSLKDPFPFVQTNIIGTYTLLEACRKYDVRYHHVSTDEVYGDLPLREDLPGHGEGEGEKFTAETPYNPSSPYSSTKAGSDLLVKAWVRSFGLRATISNCSNNYGPYQHIEKFIPRQVTSILSGIRPKLYGEGKNVRDWIHTNDHSSAVWLILTKGRIGETYLIGADGEEDNKTVMELILEMMGQPKDAYDHVNDRAGHDLRYAIDSTKLREELGWQPEFTNFRDGLADTIKWYEEHEDWWKKEKEAVEAAYAKNGQ
111	AMQ97722.1	yneF	hypothetical protein AX771_09645	0.1275	8402	10.07	Membrane	74	MLSTGIVVLIAIIALLIGAVGGFFLARKYMKDYLEKNPPVNEDMLRSMMMSMGQKPSEKKIRQMMQQMKNQGKK
112	AMQ96977.1	AS238_14650	hypothetical protein AX771_05200	0.127	27241	5.3	Membrane	237	MKTRSDVSSNKTKKTNYWKFAFLILLGVVLGSTVFLGSRIFANREPELPEIPALTERQGDPVLTINSNKEKVNQIISFFLSEYQKDSDIEYKFYLENEALLNGTFEVLGFPIDFYLYFDPYVMENGNVQLKARSLSIGTLSLPIKDVMNMIKRNYKLPDWIEVNTDDLTIMLRLDQFRMQNGMYIKADKIDLVNDDIRFSLYLPKDTSDASNNSNTNKTSTSSTESKTKENKKSSDE
113	AMQ97962.1	rnj	Zn-dependent hydrolase	0.1258	62564	5.53	Cytoplasmic	559	MSTIKIIPLGGVRENGKNMYVAEVGEDIFILDCGLKYPENELLGIDVVIPDFTYLEENIDRVAGVFLTHGHADAIGALPYLLSKISVPVFGTELTIELAKLNVSRNEAAKGFKDFHVVDEHTEIDFGETVVSFFRTTHTIPDSVGINLKTKEGSIVYTGDFKFDQTAIPMYQTDYARLAEIGKEGVLALLSESANAENPQPVASEAQIADEVFDTIKYWEGRIIVACVASNLQRVQQVLDAAEKAQRKVVLTGQDFERIIRTAMRLEKLQLPSEDLLVTLKDMKNYDPEELIILETGRMGEPIKSLQKMANGTHRNVKIEEGDLVYITTTPSIAMETIVAKTEDIIYRAGGTVKLISENMRVSGHANPNDLQLMINLMKPTYFVPVQGEYRELAAHADL…
114	AMQ98211.1	prsA	peptidylprolyl isomerase	0.1249	36850	4.82	Membrane	336	MKKKSIILAATSALAVLTLAACSGDTNKDIATMKGGTITVSDFYDEAKLESSNQSLVQRMIIYKVFNNKYGDKVTDKQVDAEYDKQAKSLGDTFESQLEAAGYTKDTYKEYIRNNLAFEAGLKAHVDITDDDLKTAWKSFHPEVEAQIIKLSSEDEAKDVKKSADDGDDFSKLAKDKSTDTETKEDGGKVKFDSTTTTIPAEVKEAAFKLKDGEISDVITTTNPTSYATEYYVVKMVKNQNKGNDMDKYKDQLKDIATETKLSDNAFTTKVIGEELKDANVKIKDDAFENVLSAFTTTSSSTKDSSETTASTKSSDTKSTDSTKESSTEETTDSSK
115	AMQ97370.1	fruAB	PTS fructose transporter subunit IIC	0.1249	67578	5.33	Membrane	643	MNIKDLMVKEAMIMDLQATDKKGAIDEMVQKMFDAGRISDIETYKEGILAREAQTSTGLGDGIAMPHAKNSAVKEATVLFAKSQKGVDYEALDGQPTYLFFMIAAPEGANDTHLQALAALSRLLIDADFVGKLKEANTPEEVQDLFQTAEEQKEAEEKAEQETQAAEASAHPERKFVVAVTACPTGIAHTYMAEDALKKKAKEMGVEIKVETNGSEGIKNRLTAEDIARAEGVIVAADKKVEMNRFDGKELINRPVSDGIRKPEELINLALSGTAPVFHGDGKESSSEEGNADGTIGQRIYKDLMNGVSHMLPFVIGGGIAIALSFMIDQFIGVPHDQLSNLGNYNQAASWFNQIGQAAFGFMLPVLAGFIASSIGDRPGLIVGFAAGALANTGGAGFL…
116	AMQ97767.1	atpA	ATP synthase subunit alpha	0.1224	56420	5.01	Cytoplasmic	518	MAIKAEEISALIKEQIENYQNVLSVEEIGTVTYVGDGIARAHGLENAMSGELLEFSNGSYGMAQNLESNDVGIIILGDFESIREGDKVKRTGKIMEVPVGEALIGRVVNPLGQPIDGLGEIVTDKARPVEAMAPGVMQRKSVNEPMQTGLKAIDALVPIGRGQRELVIGDRKTGKTSIAIDTIINQKGQDMICIYVAIGQKDSTVRTQVETLKKYGAMDYTIVVNAGASQPAPLLYIAPYAGTAMGEEFMYNGKHVLIIFDDLSKQAVAYRELSLLLRRPPGREAYPGDVFYLHSRLLERAAKLSDDLGGGSMTALPFVETQAGDISAYIPTNVISITDGQIFLESDLFYAGTRPAVDAGLSVSRVGGSAQIKAMKKVAGTLRLDLASYRELEAFTQFG…
117	AMQ97057.1	pdhB	2-oxoisovalerate dehydrogenase	0.1186	35494	4.62	Cytoplasmic	325	MAQKTMIQAITDALALELENDENVVVFGEDVGKNGGVFRATEGLQEKFGEDRVFDTPLAESGIAGLSFGLALEGFRPVPEIQFFGFIFEAMDEVVAQMARTRYRMSGTRNLPITIRSPFGGGVHTPELHSDNLEGLIAQSPGIRVVIPSNPYDAKGLLISSIRSNDPVVFLEHMKLYRSFREEVPDEAYEVPLDKAAVTREGTDVSIITYGAMVREAIKAADNLAKENISVEIIDLRTVAPLDVETIIQSVEKTGRVVVVQEAQRQAGVAAQVVSEISERAILSLEAPIGRVSAPDTVFPFGQAENVWLPNAKDIEDKVKEIAEF
118	AMQ96690.1	manZ	PTS mannose family transporter subunit IID	0.1182	33185	9.26	Membrane	304	MAEEKIKLSKKDRLAVAWRSTFIQGSWNYERMQNGGWAFSMIPAIKKLYKTKEERSAALKRHLEFFNTHPYIASPILGVTLALEEERANGAPVDDVAIQGVKVGMMGPLAGVGDPVFWFTVRPMLGALGASLAMGGNILGPIIFFLGWNIIRWAFMWYTQEFGYKAGSKITDDLSGGLLQDVTKGASILGMFVLAALVQRWVSIKFLPVVSTVKLDKGAYIEWDKLPSGGEGIKSAFEQVNNGLALSPEKVTTLQDNLDQLIPGLAALGLTLLCMWLLKKKVSPIVIILGLFVVGVVGHVIGLL
119	AMQ96539.1	metN	methionine ABC transporter ATP-binding protein	0.1173	38158	7.68	Cytoplasmic	344	MSLIQLTNVKKTFNGKNGNIQAVNDVSLNVEKGDIYGIVGYSGAGKSTLVRLLNGLELPTSGEVIVNDQDITKLKNKELRTFRKKIGMIFQHFNLLWSRTVLENIQLPLELAGVPKSKRKERAEELLRLVGLEGRGQAYPSQLSGGQKQRVGIARALANDPEILLCDEATSALDPQTTEEVLDLLLAINKKLNLTIVLITHEMNVIRKICNKVAVMELGKVVEEGDVLTVFRQPKKEVTKRFVQQDIEPEADSTELLAELIKENPSGRLATLTFSERNANEPVISQAIRRYNIDVNVVYGKIKQVKEGSFGSLTVLMTGETKELDQAEVFIKEQGVGIEVIHRG
120	AMQ96713.1	divIVA	cell division protein DivIVA	0.1114	26712	4.6	Cytoplasmic	235	MALTPLDIQNKTFPTKMRGYNQDEVDDFLDLVVRDYEELTQRNRELEKAVKHSEEKLEYFNELKDALNQSIIVAQDTADKVKTSASKESEVIVTSAQNKADELVANAEKRAHQLTTDAEEKARKILTDATEKARQLATETEDLKKKTRVFHQRISLMLESQLEQVKSPEWDEILQPFSSYVTDSHEVIKEVLAKQLDNENDTDVNSDTGVIEAPMTAFDTQAIDISIVPGENENE
121	AMQ97401.1	AS238_11630	carboxylate--amine ligase	0.111	49549	5.33	Cytoplasmic	421	MMNSIENEEFIPILLGSDMNVYGMARSFNEAYGKICQAYASDQLAPTRYSKIVNVEVIPGFDKDPVFIETMLRLAKERYSDKSKKYLLIACGDGYAELISQHKQELSEYFICPYIDYSLFERLINKVSFYEVCEEYDLPYPKTLIVREEMLVNGHLEQELPFEFPVALKPANSVEYLSVQFEGRKKAFILETREEFDLILGRIYEAGYKSEMIVQDFIPGDDSNMRVLNAYVDEDHQVRMMCLGHPLLEDPTPASIGNYVVIMPDYNEKIYQTIKAFLEKIEYTGFANFDMKYDPRDGEYKLFEINLRQGRSSFFVTLNGLNLARFVTEDRVFNKPFVETTYGTNQSDKARLWMGVPKKIFLEYARENEDKKLAEQMIKENRYGTTVFYEKDRSIKRWL…
122	AMQ97731.1	galU	UTP--glucose-1-phosphate uridylyltransferase	0.1097	34653	5.33	Cytoplasmic	312	MKVKKAVIPAAGLGTRFLPATKAMAKEMLPIVDKPTIQFIVEEALKSGIEDILIVTGKAKRPIEDHFDSNIELETNLSEKGKTELLKLVEETTDVNLHFIRQSHPKGLGHAVLQARAFIGNEPFVVMLGDDIMEDEVPLTQQLIDDYERTHASTIAVMQVPHDETSKYGIINPGEVLEDGLYNVKNFVEKPDPSKAPSDLAIIGRYLLTPEIFDVLSEQQPGAGNEIQLTDAIDTLNKTQRVFARKFTGKRYDVGDKFGFMKTSIEYGLTHPEVGAPLREYILSLGKTLEAEGSKIDHNPKGITEIKEEKKK
123	AMQ96313.1	AS238_02045	serine protease	0.1093	44845	4.81	Membrane	429	MDRKNVTPKMKKSKNNSLWRKLGLGLVGGIVGGLLTAGIFYAAMGTGNNSSTATSGNQNSAGETVVENVKVNVDSDITKAVDKVQDAVVSVINLQSQNQSSGFGGLFGQQEESSSSDDSNLEAYSEGSGVIYKKDGNTAYVVTNNHVVDGQQGLEVLMKDGTKVKAELVGTDAYSDLAVLKINSDKVETVASFGDSSALKVGEPAIAIGSPLGSEYANSVTSGIISSLNRQVTSTNESNETVNINAIQTDAAINPGNSGGPLVNIEGQVIGINSSKIASTSESTSNVSVEGMGFAIPSNDVVNIINQLEKDGKVTRPALGITMVDLSAVSTQQQEQILKIPSSVTNGVIVTNVQTATPAEKAGLKQYDVITKIDDKEVSSGVELQSALYKKKVGDSVKI…
124	AMQ97433.1	tsf	elongation factor Ts	0.1089	32223	4.94	Cytoplasmic	293	MADVTAKMVKELREMTGVGMMDAKKALVEVEGDMEKAVDLLREKGMAKAAKKNDRIAAEGLASVAVKGNTAAIVEVNSETDFVSKNEMFQDLVKEIAELVAENKPADMEAAMKIKTDKGTIESDLIEATQVIGEKISFRRFEVVEKDDNAAFGGYLHMGGRIAVLTVLDGTTDETVARDVAMHVAAINPRYVNESQIPEAELEHEKTVLTEQALNEGKPANIVEKMVEGRLKKFKAEIALVDQPFVKDPDMTVEKYVASKGATVKTFVRFEVGEGIEKREDNFVEEVMSQVKK
125	AMQ96515.1	telA	tellurite resistance protein TelA	0.1085	45067	4.97	Cytoplasmic	398	MDHKPTETKDVTPVNDTLEDLLNNPFSTPTDTLTTSQQAEIDQLQEQQTAARLIDKLPAERQEQAKQLAAKIDANDAQSVISYGSAAQAKLSEFSQSMLNHVQAQDIGPVGDSLTELMYRLQEANPDELRAGEGNIFQRVFGKVKQSIYEVTAKYQKIGAQIDKISVKLDKEKDGLLKDNLMLEQLYQKNKDYFDALNIYIAAGELKMEELQTTIIPEAMKRAEETGDQMDVQIANDYTQFLDRLDKRTHDLRLARQITIQQAPQIRLIQNTNQALAEKIQASIATAIPLWKNQVVIALTLLRQKDAVTAQRQVSETTNDLLKKNSEMLKISAIETAKENERGIVDIETLQTTQNDLIETIQETLRIQKEGKEKRRHAEVELGHMEEDLKQKLLDLTQ
126	AMQ98017.1	AS238_05070	hypothetical protein AX771_11380	0.1076	29837	5.73	Membrane	255	MTFLLDLINGVHKFLGYLDISPKYLNRGYTILSVIPTLYLLRIVYGLWQNQNYLQFFLYGLAFLVLVYFTVLNVFYYFLDKNTKADVTQLFVKYLPDEAFNIQTEESIDNGNSIDKVNTQEVMVSYDEDYQLKLAENMRYLIGNGEIKTNELGRMDGFLVDRNTLYPYYYVKKTGEKEYVLNIGRSYSDMEKVGTIRLDSTEDTLEPVGLFIVGGDFVKDGLRYHEPYRLKLIAKKAQSQEEPVVYSRSQRRRHS
127	AMQ97113.1	AS238_08425	peptidylprolyl isomerase	0.1068	27430	4.8	Membrane	253	MKKNKVILSISLAAALLFAAGCSANNTTSSSSSTESSKSTSTAESTTASSVDLNALELPQLTKDVAENEDLVEMVTNKGTIKIKLFPEHAPKAVENFMTHAKDGYYNGLTFHRVIKDFMIQGGDPKGDGTGGESIWGEGFETEINNHLYNIRGALSMARSQDPNSNGSQFFIVQNTDDMHDGLLKDDYPQAIIDAYKNGGYPSLDGHYTVFGQVIEGMDVVDAIANIETDSSDKPKEEVKIDKINILQEAKQK
128	AMQ97736.1	AS238_07685	PspC family transcriptional regulator	0.1064	12021	9.33	Cytoplasmic	105	MKKKLTKSNKNVVLTGTLAGIGEYIGIDPTVIRVLYVFLSLVAFGSPIILYILLALIIPSARSARTNYGHNNAYYEKNNYREQTREQTKKRKEAEKIDDDEWSDF
129	AMQ97070.1	ylbL	peptidase	0.1059	37935	5.03	Membrane	347	MKAKQWLKTVLIIIFGMLIIGFVVVPLPYYVESPGATIDLKELITVNDKEDKGSGSFSLTSVGIRQATGFLALKAKMTPFEELISEEELTGGATNEEYNQMQQYYMDSSQNAAIEQALKLADKPYKMEFKGVYVMSVEKTSNFFGKLSVGDTVTKVDGKSFQSTEAFMDYVKSQKVGQTIEISYLHNGEEKTASGDLIELPTDKKAGIGITLTDHTEIESDTDVRINSGSIGGPSAGLMFTLEIYEQVTGKNLRHGKQIAGTGTINSEGEVGRIGGIDKKVASADKAGVEIFFAPDDTISDDVKKEYPEIKTNYEEAKAAAKKLNSSMKIVPVKTVQEALDYLEKMK
130	AMQ97432.1	pyrH	UMP kinase	0.0992	25941	5.66	Cytoplasmic	240	MVTPKYQRVVLKLSGEALAGDAGFGIKPPVIKEIIQEIKEVHELGVEMAIVVGGGNIWRGQIGAQMGMERAQADYMGMLATVMNALALQDTLENVGVPTRVQTSIEMRQIAEPYIRRKAERHLEKGRIVIFAGGTGNPYFSTDTTAALRAAEIGADVILMAKNNVDGVYSADPKVDANAVKFEELTHLEVIAKGLQVMDSTASSLSMDNDIPLLVFNLNEHGNIRRAILGENIGTTVRGK
131	AMQ98664.1	BU186_14090	sugar ABC transporter substrate-binding protein (plasmid)	0.0979	47826	4.38	Membrane	437	MKKRMLAIAAILALTAGGLAGCGSKEKSSGSSDPGEIKIWVQFSDETPEGKAWAEIVNNFNDEYEGEYKAVTEYIPRSGSGGGYEDKVNAAITTNTLPDVITLDGPNTAAYAHSGVIAPLDDYLKDADMDDVLDSIIQQGTYDGKMYAFGFSESSVGVYYNKSLFKDAGITEDQLPTLEDPWTWTEFQAICQKLTDKYKTPAIDMQMASGDEMLTYAYTPFIWSNGGDVVNADGTKAEDYFNGKKSVEALEFIQELVEKGYTTISPIEKGFETGKYAMMLSGSWTMADLEENYQEIDYGILPYPVSDATGELVSPTGSWQLAMTEKTEKKDASAAFIKFATSTESSRIMSLGNSVLPIRNSTVDLIKDEVSEGMQVLIKQNQLSGHARPVVVAYPQVSR…
132	AMQ98123.1	AS238_09695	fatty acid-binding protein DegV	0.0979	31626	5.1	Cytoplasmic	286	MKNNKIAILVDSGTDVPEELIKKYEMYMIPLKIIYKDQVYTDKIDITSEEIYQRLPEEIPGTSLPDGESITEIFEQIKKDGYEKVLAVTISSGLSGTYNVVRLIAQQQEELEAYVLDTKNIGIGAGFSAIQAAKWLEEGVEWDQLISNLNELVERTKVFFNVATLEYLQKGGRIGLVASIVGTALKLNPIISCNEEGIYYTVGKARGRKKSLDKTVAYVKEKIGNAKVFNLAVAHGDAKEEAIEMEARLKREFPQANQIYFGQISPALVVHTGPGLLGVGVQVLEG
133	AMQ97764.1	atpC	ATP synthase F0F1 subunit epsilon	0.0958	15551	7.03	Membrane	140	MDQYLTVNVVTPAGLVYDHHAAIVVARTTAGELGILPKHAPIIVPLTIDEVRVKRTDSDTHVDWIAVNGGIMEVRDNVVSIVADSAERERDIDVSRAERAKQRAERQIEEAKAKQDTNELKRATVALHRAINRIKVSKHS
134	AMQ96951.1	rsuA	pseudouridine synthase	0.0945	26742	9.62	Cytoplasmic	238	MERLQKVIAHAGITSRRKAEEFILAGRVKVNGQVVRELGIKVGKHDTVEVDEVPIYQEEYGYYLLYKPKGVISAVADDKGRKVVTDLLPMVKERIYPVGRLDYDTSGILLLTNDGDFAQRLTHPKHEVDKVYVAKVKGIATKSMLAPLTKGIKIEGRKTSPAKFQILSVDPKTNHSIVELTIHEGRNHQVKNMLQAVGLPVQKLKREKYGDLTLQGLRPGDYRELNKKEVSSLLNHSK
135	AMQ98071.1	HMPREF1359_02353	hypothetical protein AX771_11705	0.0941	65675	5.5	Cytoplasmic	585	MQETTSISKGGIVMAETQHKMVLSTTEPNNGINLVRIRQGDVLTQKFVVEVVEHGKLKTFEGLVPFFINTTKFGENQPVEQKVQEYSPAQARLVYTLSEPDWQWGGENTAHFSFRSLNGDGTWSEQFSTQDFTYRVISGISRSQLRDSGYVWTFEDLLRKFKDYMDQGKNDWEQWLEDNREILENIDPGGTIINILNEAKGDYESLADRLNQKYQVPVGSSQIRETTRFFDYDTMKYVDLVPRNLNTVVNSVNNSKFNFSFITDIHVDNHNLRIDGVGYKDASYLRHWRAIPQFQKLGNKTDVMIYGGDNIDGGLGSLGSDIGIIDEWSARHSMLGTLKRFTNAAVAGQEKPVIICKGNHDACFDPAWRKRKGMLCNADFEEYWNGLYGGVLFPDKNAA…
136	AMQ98706.1	AWT83_16455	multidrug ABC transporter ATP-binding protein (plasmid)	0.0937	24059	9.3	Cytoplasmic	218	MDILEIKNVAYSYANSKEKVLSGVNQKFELGKFYAIVGKSGTGKSTLLSLLAGLDKPQTGKILFKNEDIQNKGYSNHRKNNISLVFQNYNLIDYLSPIENIRLVNKSADESILFELGLDKKQIKRNVMKLSGGQQQRVAIARALVSDAPIILADEPTGNLDSVTAGEIINILKTLAKDRNKCVIVVTHSKEVADSADIILELSGKKLKKVNKMNLEVE
137	AMQ97363.1	aes	lipase	0.0924	38305	6.25	Membrane	337	MKKKILKFIGWFFGIILGIAFAIFLAFQLSPRPGAFLINHMFSNTVQITDKKTFDQAEKNVAKKTDLTYESKYKENTYDIYYPKNSKGPVPVLFWVHGGGFVGGDKSGVKEFATKLVSDANIAVVAMNYELAPDSEYPNQVLQVNELIKDLLAEEKDDKLLDMEQLFFGGDSAGSQIALQYAAIQTNDAYAKQMKIKQLLPKDSLKGTISYCGPVDLKLTAQQHSDDRFMKFFVKTVAWSLIGTKDWKTSEQLKEASVADHVSKEFPPTYITDGNAYSFQEQGQALENRLTELKVPVQSLFYTDTKKEITHEYQFDYTLKESQNCYQQTLDFVNKYK
138	AMQ97857.1	rex	redox-sensing transcriptional repressor Rex	0.0924	24363	5.43	Cytoplasmic	218	MKDHIIPKATAKRLPLYYRYLRILNNAGKKKVSSTELSEAVQVDSATIRRDFSYFGELGKRGYGYDVEDLMHFFAKTLNDDQLTNVALIGVGNLGSALLKYKFHQSNSIRISCAFDVNEEIVGRIVDGIPVYPMEDMSEQIKIQQIEVAILTIPAERAQEVVNQLTEAGIKGILNFTAARLNAPSDVLIQNVDLTNELQTLIYFLHSDANAHSENTAE
139	AMQ97700.1	HMPREF1359_01859	tyrosine protein kinase	0.0891	24831	9.42	Membrane	232	MARTQKQKATQTHAVSLITLTNPSSPIAEQYRTIRTNIQFASAAGQQIKTIVVTSSGPGEGKSTTAANIAVVFAKSGQRVLLVDADLRKPVVYKTFQLNNASGLSTALSSSGSVADVIQRTPVENLSILPSGPKPPNPSELLSSPRMDQVLAEARQLFDVVIFDMPPVVAVTDAQIMSSKTDGTLLVVRENTSRKESLTKAKELLEMVQARVLGVVYNGAEHSKDAGYYYGN
140	AMQ96309.1	pepA	glutamyl aminopeptidase	0.0882	39448	5.2	Cytoplasmic	359	MEEKTFQRIKELTELQGTSGFEQDVRAYMESHMEPLVDELQLDGLGGIFGLRHHEEADAPRVMVAAHMDEVGFMLTQIQENGLFKVVPLGGWNPYVVSAQRFTLKTSTGKNYPCISSSVPPHLLRGTSGQKSVEVTDILFDAGFESREEAMSYGVLPGDTIVPYAETIKTANGKNIISKSWDNRYGCTMVLEALEALQNETLGHTLIAGANVQEEVGLRGSKASVNKFKPDLFFAVDCSAADDTVTKNGTFGHLGEGTLMRIQDPGLIMLPRLREYLLDIAETNNIPYQYFVSKGGTDAGAAHTQNEGIPSTVIGVVGRYIHTHQTMFSIRDFEAAREMLIQTLKGLDKSTVNTIVYGK
141	AMQ97745.1	pstS	phosphate ABC transporter substrate-binding protein	0.0874	31018	4.77	Membrane	285	MKKLKLFLPIIGLAILLSGCSKWIDRGESITAVGSSALQPLVETVAETYQTENPGKFINVQGGGSGTGLSQVQSGAVDIGNSDLFAEEKSGIDASALVDHRVAVVGITPIVNKDIGVKDISMENLKKLFTGEIKNWSEVGGKDQPVVILNRASGSGTRSTFEKWVLDGETAVQAQEQDSSGMVRQIVADTPGAISYVAFSYVSDDVDTLNVNGVEPTDENVTTNKWTIWAYEHMYTRDHPKKLTKEFLDYILSDEVQDNIVGELGYIPVSHMKVERDWQGNIVKE
142	AMQ98271.1	ftsH	cell division protein FtsH	0.0869	77546	5.25	Membrane	703	MNKKNNGMMKNALYYVLVILAMVMVVYFIFGNNGQRSSDIEYSKFTEQLQAGKIKEFEVQPANGVYKITGEYKEQQTVANSGGLAILGSTDTTTTHFTTIILPNDTTLSQVTELAKENKVATTVKEESSSGIWVSLLLSFLPIVIIIFFFYMMMGQQGGGGGGGGRVMNFGKSKAKEADKKANRVRFSDVAGAEEEKQELVEVVEFLKDPRRFVELGARIPAGVLLEGPPGTGKTLLAKAVAGEAGVPFYSISGSDFVEMFVGVGASRVRDLFETAKKNAPAIIFIDEIDAVGRQRGAGMGGGHDEREQTLNQLLVEMDGFDGNEGVIVIAATNRSDVLDPALLRPGRFDRQILVGRPDVKGREAILRVHARNKPMADDVDLKVVAQQTPGFAGADLEN…
143	AMQ97741.1	pstB	phosphate ABC transporter ATP-binding protein	0.0861	28356	6.14	Cytoplasmic	252	MTKEIISSKDLHLYYGKKEALKGIDLSFNQGEITAMIGPSGCGKSTYLRSLNRMNDLIPNVTITGSVLYKDKDIYGPKTDVVELRKEIGMVFQQPNPFPFSIYENVIYGLKLKGEKDKKVLDQVVEESLKAASVWDDVKDKLHKSALSLSGGQQQRVCIARVLAVNPEIILLDEPTSALDPVSTGKIESMLLELRERYTMIIVTHNMSQASRISDKTAFFLDGHLIEYNDTKKIFMNPEKQETEDYISGRFG
144	AMQ96707.1	ftsQ	cell division protein FtsQ	0.0857	46031	4.99	Membrane	406	MSKKKEPKKLSHPSSDENNLTPWQKANRKYLAEQEMKNQEPKKEDITLDTPLSDSEEEKTVQEEQQEESQSEKKIEFFEEIKQKKNGGPYNGSFLNRLPNLKSQRHKVLFRRLALIITVLGIPLIFLIYYVSPYSKLQAVAVSGNKTVNSQEIISDTKLSLGENVWGQYFHRSTYIDRLKKAQPRIETANIHFKGMNEFDLDVTEYKEIALIAKNNQYYPVIENGTVLDEKVANPTKNLPILEEFKDSAKIKELTKQYNQLSSELQKAISEIKYTPRASNKNLIQLNMNDGNQVIVNINNLANQMKYYSQVAKDMDEKGVIDMEVGIFSHPYGSTQETEESGQSEETTESEENADQTNESSEEAETQKAQTPGSSSTNGSSDSNDSSETSQIEDNPSTT…
145	AMQ97909.1	B1P95_16910	toxin PIN	0.084	7942	9.63	Extracellular	67	MNTRHRRVAKLRKQELNVLKTKFEKEYGISAEETYKVASQFVADASDAIRKFGISILNDDRKWEEMR
146	AMQ96517.1	AS238_06165	hypothetical protein AX771_02420	0.0836	10999	10.37	Cytoplasmic	94	MAKGPLITRSELRKRQQAQASESLKKQRKAETAYQQEEKKIASFYRKESKKNKPITKTRISEREKTTKWNSFLMKSLIIVILMLCVVFLAIAFI
147	AMQ96277.1	yajC	preprotein translocase subunit YajC	0.0823	14091	4.49	Membrane	126	MGTLPMLVMFIALLAMWFFMSRSQKKQQQERQNLLDSMKPGDSVVTIGGLHGVVSEIDNDKRTVVLDCEGIFLEYDRAAIKTVKPGTVVTNDATTTVETTEEPAETVEVKTETTETLEETEEKEEK
148	AMQ98129.1	AWT83_01495	glycine betaine/L-proline ABC transporter ATP-binding protein	0.0815	44485	5.14	Cytoplasmic	397	MVKVEVKHLTKIFGKKTQAALDMMNDHQPKTEILKKTGATVGVYDVNFDVKEGEIFVIMGLSGSGKSTLIRLLNRLIEPTSGSIYIDGEDVSKLSKEELREVRRHKINMVFQNFGLFPHRTILENTEYGLEVRGVPKEERQEKAEKALENSSLLSFKDQYPSQLSGGMQQRVGLARALANDPEILLMDEAFSALDPLIRREMQDELLDLQANVQKTIIFITHDLNEALRIGDRIALMKDGEIMQIGTGEEILTNPANDYVREFVEEVDRSKVLTAQNIMVPALTTNIESDGPNVALTRMRNEEVSMLMAVDRKRHLKGIITADQALEARKQKRPLIDFLDENVTVIGKDMVVSDIFNIIYDSPTPLAVVEDGKLKGVVIRGSVIEALAETSEVSEHE
149	AMQ97784.1	gap	glyceraldehyde-3-phosphate dehydrogenase	0.0802	35741	5.26	Cytoplasmic	333	MTVKVGINGFGRIGRLAFRRIQDVDGIEVVAINDLTDAKMLAHLLKYDTTQGRFNGTVEVHEGSFNVNGKEVKVLANRNPEELPWGELGVDIVLECTGFFTSKSAAEKHLTAGAKRVVISAPGGNDVPTIVYNTNHETLTGKETVISGASCTTNCLAPMAKTLNDKFGVVEGLMTTIHAYTGDQMTLDGPHPKGDFRRARAAAANIVPNSTGAAKAIGLVIPELNGKLDGAAQRVPVPTGSLTELVTVLEKEVTVDEINAAMKEASNESYGYNTDEIVSSDIVGMTYGSLFDATQTKVMTVGDKQLVKTVAWYDNEMSYTAQLVRTLEYFANL
150	AMQ96728.1	B1P95_06695	hypothetical protein AX771_03700	0.0802	23521	5.27	Membrane	211	MDGIFGFTGIVLFIIGLIMLIVRFIKKTNKKTPMILLIIGIIFTTVGFSLSSSNEANDNNKQESSSSDTQTTTSNSSNKSLTQFEEFLETNNHDWGAFLDSYYSITPATEQNTAFTKYISGKTYTFEGTVIESMTTRIAIIADKEYDDKSWNDISATPKVSYVIFAKDLNNADTFTKGDKVTFTGEISSRGSNIEKSYAQWDMINSKVSKK
151	AMQ97054.1	guaC	guanosine monophosphate reductase	0.0794	35948	7.66	Cytoplasmic	325	MKVFDYEDIQLIPNKCIVNSRSECDTTVTLGKHTFKMPVVPANMQTIIDETIAEFLAENGYFYIMHRFDEAARIPFIKKMKKRGLITSISVGVKKEEYSFIEKLAEESLNPDYITIDIAHGHANSVIDMIQHIKKYLPETFVIAGNVGTPEAVRELENAGADATKVGIGPGKVCITKIKTGFGTGGWQLAALRWCAKAARKPIIADGGIRTHGDIAKSVRFGATMVMIGSLFAGHEESPGETKVENGIVYKEYFGSASEFQKGEKRNVEGKKIWIQHKGSLKDTLVEMQQDLQSSISYAGGRDLEAIRKVDYVIVKNSIFNGDTI
152	AMQ96599.1	AS238_13005	ABC transporter ATP-binding protein	0.0789	32930	5.21	Cytoplasmic	301	MKSLSVQELSKNFGHKQALSDVSFSLSPGKIVGLVGPNGAGKTTIMKAILGLIHYSDGTICIGENEISPSSHKGLEQVGALIEYPGIYPFLTGYDHLKLFSETNDVSAIDTIVNQLKMEKYIHKKAKSYSLGMKQKLGIALALLNHPSIVILDEPMNGLDPQATRDVRKIITDLATQGTSFLISSHLLSELEKMVDELILINQGKIIKQCTMAELNQTAQDFIVISTTNDLAARTILTEAGYTLEDPDKIKLLKENEELLGTVIQLLSAQNIHVTDVQHLTNDLESSLLEILDSVKGEEEK
153	AMQ97775.1	secG	preprotein translocase subunit SecG	0.0777	8436	9.99	Membrane	78	MYNLILGIVIVLSIVMVIAIMMQPSKQNSAASAFTGGADQLFGKQKARGFEAVMQRSTAVMGAIWMILLFVLAYLSSK
154	AMQ96955.1	AS238_06285	carboxymethylenebutenolidase	0.0777	27049	6.54	Membrane	245	MKIFRRILIGLVIILGLLGGAGYYYIQQNTYEPSSEAQVLVKEGKNKEDYLFFEGEKKNHGKSPLLIFYPGALVEPESYSIWAQDLAKNGFSVAIVKMPLDLAVMGGNKADKVKEDFPNSDYVIGGHSLGGVMASRYVNKNHSDKHLKGVFFMASYPDKKGTLTESAVPVLSITATKDKVLNQEAYQEAKQYLPERTEYVSINGGNHGGFGSYGEQKGDGEAEISNADQQTVIVNTLENWLKKLK
155	AMQ98277.1	AS238_03135	hypothetical protein AX771_13080	0.0777	52024	5.04	Membrane	466	MTRSSHRKKSKHVALLSVLGVLLVLISFYTYRSTYYTKHFLPNTEINGINVSNLTVEKANEKLKEAYSDKKLAIKEDGKVWQEVPKSELGYKDDFTSELSPILNEQNGWTWGMTYVSAAEKQEIDPVSQNHQKLDTTVQTLTTKLTDLNKDRTPTTDATIEKAGDSFVIKPEVNGNTIDVDAAVKQLKSAVNSGKDTIELTEFKEKPKVTSEDSSLKEQLASMNAIANVKATYSINGETFQIPSSDIMSWLTYNDGKVDLDTEQVRQYVTDLGTKYNTSTNDTKFKSTKRGEVTVPVGTYSWTIQTDSETEALKKAILAGQDFTRSPIVQGGTTADHPLIEDTYIEVDLENQHMWYYKDGKVALETDIVSGKPTTPTPAGVFYVWNKEEDATLKGTNDD…
156	AMQ97742.1	pstB	phosphate ABC transporter ATP-binding protein	0.0772	30311	6.92	Cytoplasmic	268	MKKYNWNETNVITMPKEKEVALYTDDLHVWYGDNEAIKGVDLEFEKNKITALIGPSGCGKSTYLRSLNRMNDGIANTKITGKIMYQGVDINAPQVDVYEMRKRIGMVFQRPNPFSKSIYDNITFALKQHGEKNKKKLDEIVETSLKQAALWDQVKDSLDKSALALSGGQQQRLCIARAIAMKPDILLLDEPASALDPISTGTVEETLVNLKEDYTIIIVTHNMQQAARISDYTAFFYLGKVMEYDKTNKIFTRPKIQATEDYVSGHFG
157	AMQ97747.1	ftsX	cell division protein FtsX	0.0772	33438	8.94	Membrane	297	MDTMIRTFFRHLLESIKSLKRNGWMTVASVSAVTITLTLVGVFMAVIMNATKLAQDIEGNVDVSVFVDIGTKDEEMKKLEKELNDLDHVKKVEFSSKEQELKKIQNEMGDSWKLFEGDNNPLYDVYVVSATDPSYTKQVAEEAADLKNVSRSDYGGASSDRIFQIAGAVRTWGLVAAALLLFVAMFLISNTIRITILSRQREIQIMRLVGAKNGYIRWPFFLEGGWIGLIGAILPILIITFGYAWFFQLINPSLLRSHYSLIHPQNIVWKINLLMVGIGVIIGSLGSIISMRRFLKF
158	AMQ96480.1	fhuC	manganese ABC transporter ATP-binding protein	0.076	27537	9.5	Cytoplasmic	248	MERTAIVIQDLSAAYQGKTVLKTINLTINPQKITGIIGPNGAGKSTFMKSLLELIPATTGKVTFSGQSVNSVRKKIAYVEQRSELDLSFPIDVLGVVLLGTYPSLRIGQRPGKKEKERARQALKKVGMEEYAKRQISELSGGQLQRVFIARALAQGAEWIFLDEPFVGIDALSERKIFDILQELKNSGKTILIVHHDLHKVEEYFDEVILLNKQLIASGPVQEVFTSKNLQLAYGEIIRHLVKGGEKK
159	AMQ96841.1	acpP	acyl carrier protein	0.076	8558	3.87	Cytoplasmic	74	MVFEKIQEIIAEELGKETEEIKLTTDIQEDLEADSLDLFQIINEIEDEFDVKIETEDGIKTVQDLVTYVEKQTA
160	AMQ97810.1	ecsA	sodium ABC transporter ATP-binding protein	0.0756	33959	5.57	Cytoplasmic	299	MLEVKDLVKTFGNYTAVDHVSFQIPDGKIMGLIGQNGAGKTTTFRLILDFLTQDQGEVLWNGHHLGEKDYDVIGYLPEERGLYPKVTIQDQLLYFAELRGKSRKEIEPKIDFWMEKFQVKGKKTDKVKSLSKGNQQKVQLIATLIHEPKLIILDEPFSGLDPVNAELLKDGILELKKHGSCVIFSSHNMDNVEKICDHLIMLRNGKMVLNGKVHEIRESFGRTKLFLESGLSQQEVEEIEGVKKVILHEDNTLEITLEDPEAGKEIFTRATQFGYIPMFNQQPPTLEEIFKLKAGEIDA
161	AMQ97366.1	gatB	glutamyl-tRNA amidotransferase	0.0743	53584	5.21	Cytoplasmic	476	MNFETVIGLEVHVELKTNSKIFSPAPAHFGAEPNSNTNVIDWGYPGVLPVMNKAALEFGMKAALALNCEISKDTHFDRKNYFYPDNPKAYQISQFDQPIGHDGWIEIEVEGKKKKIRIERVHLEEDAGKNMHGIGGYSYVDLNRQGTPLIEIVSEADMRSPEEAYAYLEALRSIIQFTEVSDVKMEEGSMRCDANISLRPYGQEEFGTKAELKNLNSLSFVKKGLAFEEKRQAKVLLSGGEIQQETRRFDETTNKTVLMRVKEGSSDYRYFPEPDIPKFVIDDEWIQKVKASLPEMPASRRERYIREFGLPEYDAMVLTLTKEMSDFFEAVLENGADAKQASNWLMGEVSAYLNSEKLELAETKLTPENLAGMIRLIADGTISSKIAKKVFRELITNGG…
162	AMQ97263.1	amaP	hypothetical protein AX771_06885	0.0734	21663	9.32	Membrane	188	MNKGLKIIGVIMSLLLLSVFLAIALINAPYIMPEQLERFRFFTLTNYYMQQYIFWAAVVFAVLAIIILLVVLFYPKSRGTFVMKREDGKLTIDKKAIEGLVRSHLHEEEFIHSPKVRIRSTKNRIHIHVNGDLKRTSSLVGKTGVLMQDIEEEVTKVLGTKETVKVAVTYSGYEEQEDTRDYKHSRVE
163	AMQ96275.1	AS238_01820	hypothetical protein AX771_00985	0.0722	25181	8.67	Membrane	232	MQSSAELKRQAKESLKGRWGQAVLLNLIPTLIGIATILLIMIPIILFATTIYDGSASVSEATTSGGGSSGGGGGIISSIISALFMSGISWTYLDILRGQKDQIEPFKDAFRGFKGLFIGGVISLAVLISIFTTLWGLLLVIPGIIKSYSYSQSYFIYYDIVQETGQTPKVLDTITASRKLMDGYKGQLFWLDLSFIGWHILALATAGIGYLWLSPYISATKAAFYEQLPKDI
164	AMQ97149.1	cshB	DEAD/DEAH box helicase	0.0722	51309	9.6	Cytoplasmic	449	MNNFDIFRFKPFINEALTAKGFKQPTEVQERLIPLIAKGKNIIGQSQTGTGKTHTFLLPLFEKINAEKEEVQVVITAPSRELAAQIYEAATQIAKFSTPEIRVSNFVGGTDKQRQLNRLHHQQPQVVVGTPGRILDMMNEQALKIHTAFAFVVDEADMTLDMGFLNEVDQIASRLPEKLQFLVFSATIPEKLRPFLRKYMENPIIEEIKPKAVISEDIENWLISTKGKDENQMIYQLLTIGHPYLAIVFANTKQHVDEIADYLKNQGLKVAKIHGDITPRERKRVMRQVQNLEYQYVVATDLAARGIDIEGVSHVINAEIPEDLDFFIHRVGRTGRNGLKGTAITLYSPNDEQAIDAIEKLGVSFEPKEIKNGEIVKTYDRNRRAKREKSKDVLDPTLI…
165	AMQ98646.1	HMPREF1359_00224	sortase (plasmid)	0.0722	25207	6.33	Membrane	223	MKKWLFGFLGVALIVFCSVFGYVSYQKHEGEVFKQNIEKKMPIDQINEHAKSYKEDATNVNNDMSLGQMLSIQKEAIEMGVNKQAFAQIQIPALGLTLPIFKGANQYTLSLGAATYFYEDAEMRKGNYVLAGHNMEIPGVLFSDIQKLSLGEVMDLVSNDGVYRYKVTRKFIVPEYFKLIDGVPEENSFLSLPKKGEKPLLTLFTCVYTSQGKERYVVQGELQ
166	AMQ97551.1	AS238_14580	SAM-dependent methyltransferase	0.0718	44867	5.99	Cytoplasmic	392	MKVKVKKRASNRLKKGYPLIQKEDLAHPQKETTQWVELVDSQNQFIAKGYLGKQNKGIGWVLSQQNIPFDQSFFEEFFVKSKEKRTFFFSDDSTTAFRIFNGEGDGIGGLIVDYYAGYAVFSWYNETLYAHRELLIQAFREIYPEIIGGYEKIRFESVNLPESQFIYGKEAPEPLIVKENGVKFAVYLNEGLMTGIFLDQKEVRGSLAEGFASGKTVLNMFSYTGAFSVAAAMGGAIETTSVDLAKRSLKKTQEQFEVNGLDVDQQKIIVMDVFEYFKYAKRKQFLYDMIVLDPPSFARNKKKVFRVAKDYGELVKDSLDILAEDGILIASTNAANVSIEQFQTMIEEEFHAKNVSFEQLALYRLPKDFQTTDTFLEGNYLKVFVYQIKNNH
167	AMQ98279.1	AS238_03145	hypothetical protein AX771_13090	0.0709	18842	9.64	Membrane	168	MNSSKKQMKNGNIYLVIALIVVIILFYSSSQTYGQQSQVSRLESWLPNQPFKDTLAGIRFNYGGSMVSIDHLGYAKFLEFFLRKGAHFGTYFILGGSLFLGVFPKLKIWWLTAILAWLSATGYAGLDEFHQMMTGGRTPMFQDVMLDSIGALTAVILCVLFAAFKKRL
168	AMQ98801.1	AWT83_17015	chromosome partitioning protein ParA (plasmid)	0.0701	29015	4.92	Cytoplasmic	262	MARILSVANQKGGVSKTTTSVNLAACLKFVYGKNVLLVDIDPQGNATDNVGFDIDGTNQPTIYEVLKGEADITDAILDYKGIDVLPADIALSSAEREFTQVGSEHRLKRVLQPIKDNYDYIIIDCPPSLGMLTVNAFTVSDEIIIPVEAAYFSLKGLIKLSETIETVKEYTNDKLEVRGVLFTKYNKRYNISKEMTSAATEISRVIGAKIFKTYIRRTITVDEAQAAGSDLINFNKPSTAEDDYKAFTEEYLKEVGDFDGRR
169	AMQ96674.1	dltD	D-alanyl-lipoteichoic acid biosynthesis protein DltD	0.0696	49172	9.41	Membrane	422	MKKKLFAIFGPVVLAVGLLFVFFTSSYQVDISNPETIRRASSSMSVNVLKGDAIKNYALSEKQYIPFFGSSELSRISPFHPSVLAEKYQRNYRPFLLGAPGTQSLSQYMMMRSAGDAMKNKKVVFIISPQWFVKNGVKTDYFNTYYSELQTYDWLFSMKKVTPADRYLARRLLTFSKVKENDTLTAILQTIKKGKLPLPESLNQLRSQWNMLKREDEVFSNIGLKDRQQKIDHESKRLPKQYQETELSILANQIGERETTNNPFGLKNDFYTHRIRAHEPELKQSQKNWDYRFSPEFSDFQLVLDQLAKNHNEVLFIIPPVNEKWSDYTGLSQEMLQGFAKKIKFQLNSQGFNRIADFVNQAGTNYFMEDTIHLGWKGWLAADQQIRPFLEENHITASK…
170	AMQ96576.1	AS238_10150	hypothetical protein AX771_02780	0.0696	15723	4.83	Extracellular	141	MKKLIVLFILSAGLLTLTGCDLFGGSDQSSDETTDSSVLKAEKADTTNSVYTLKVRKDMDLSAGQLTFTDKKMEWTRTYQTQGTDSSESSEEKTVLTDIKITTKDDEYIISGKENKKETTVIFTKIGNYRLKDEDGNIYSL
171	AMQ96478.1	AS238_06850	peptidoglycan-binding protein LysM	0.0696	32392	4.77	Membrane	298	MYDENEWGENVRMTRRRQQKQAARKRMIMIGAAVAVFLIIAGGVAGLYFHGKNSSEAKSTTITETTTKKTETKQTSESSTKTKETQTSEEKTANGLPEQLQAIVNDYSKKIEEKTPALIEEYQTEIQGNQEGIAGLSAVANQKARELQAISDEGIRKLRAAYQAAENKDGVDLDTLINQLSANYTNHVAKISDIYLQTSASLQAESTSTQDTTSSDSETAESVEASEMQARTTQDTTDSSETNTNSATSQAATTVVLEGEGPNQIAERTGVPVETILSLNGMSMENYFLTPGETLKLN
172	AMQ98142.1	rplL	50S ribosomal protein L7/L12	0.0696	12461	4.52	Cytoplasmic	122	MALNIENIVAELKEATILELNDLVKAIEEEFGVSAAAPVAVAAAGGAAAAEEQTEFTVELTAAGDQKVKVIKAVREATGLGLKEAKAVVDGAPAPVKEGVSKEEAEELKAKLEEVGASVTVK
173	AMQ96848.1	accA	acetyl-CoA carboxylase carboxyl transferase subunit alpha	0.0688	29287	5.7	Cytoplasmic	261	MDKTAHDVVQLARAKERWTSLDFFEEIFDSFEECHGDRLFADDEAIVGGIARLDGKPVTVIGIQKGRDLQENIRRNFGSPHPEGYRKALRLMKQAEKFNRPVITLINTAGAYCGVGAEERGEGEAIARNLLEMSDLKVPIIAIIIGEGGSGGALALGLADEVWMLEETIYAVLSPEGFASILWKDGSRAAEAAELMKITAPELRELGIVDRVIPETFNGEQLPRYKVAHIMKKALIERLTELVRLDQHKLLEKRYKRFRQY
174	AMQ97740.1	phoU	PhoU family transcriptional regulator	0.0684	26041	5.23	Cytoplasmic	225	MLRTQFEEELLNLHNQFYEMGMMVSSAVHKSVRAYIKHDKILAQEVIENDININNMETRLEKKSFEMIALQQPVTTDLRMIITVMKASSDLERMADHAVSVAKSTIRVKGQTRIPEIEKEISDMSDYVKKMVDNVLVAYVKTDEKDARTIANMDQRVNDYFNRIYNATIKNMQENPETVISGTDYLNVASYLERIGDYVTNICEWIVYLATGKITELNTNHNEIF
175	AMQ98070.1	HMPREF1359_02352	hypothetical protein AX771_11700	0.068	29539	5.74	Cytoplasmic	260	MLDFQSKPNIFEEMSYEEAVKWLLRQAAIHYDGSDHDAHVLATESNAGFATPETVMQARGRWLRDYKLPQKYPNILDIPPGKYATKAGWGANNPGGIEDDSFVEMMVFADHDLRKLIVAFARYSGEIYIKMTHNSDPVEGYNSLGWRRVYTTSVLFEGELRKGQSVNLPDDTFRYQTLRIHYTDGDGDFIEEIKRQRYARITKANLWNGDAGVTFIEFELTIEARKITMSNGRVLNISSGNVSNPAMSNDVKITKIEGVK
176	AMQ97485.1	prgP	chromosome partitioning protein ParA	0.068	36300	5.33	Cytoplasmic	317	MENLRTAFKTSDKLGKVVMLTGRKGGIGKTTDNDLLAIVSSQLFEKDVLLIDYDQQRNTTSNIGSTYQITSFDRSMSAAIKKGDWVSGITQVSPHLYIMAGSPGSEELNEYLSEKYPDRRKRSLAFIKPLEELRKNFDYIFIDCPPSTDNVVRAFLTAADYIIAMQELKRYAMEGTEDFINKVLVPIVTNFEESHLQIIGILPVLFSVRRSSQHANYQKTIDKYGESNIFKSIVKGSDRLEMYGENGIQLNDYVDRRWWAIFADIFTELEERIEYYEQHGDIEGFDYTPKYADSMANHILPLGKEIKLNGIITNEQR
177	AMQ96276.1	tgt	tRNA-guanine(34) transglycosylase	0.0675	43275	6.39	Cytoplasmic	381	MTQPAIRYRLIKKEKHTGARLGELITPHGTFPTPMFMPVGTLATVKTMSPEELKEMGAGVILSNTYHLWLRPGEDLVEEAGGLHKFMNWDQPILTDSGGFQVFSLSDMRNIEEEGVHFKNHLNGSRMFLSPEKAINIQNKLGSDIMMSFDECPPFDESYDYVKKSVERTSRWAERGLKAHANPDRQGLFGIIQGAGFEDLRRQSAKDLVGMDFPGYSIGGLSVGEPKSEMNRVLEFTTPLIPENKPRYLMGVGAADSLIDGVIRGVDMFDCVLPTRIARNGTCMTSQGRLVVKNAKYAHDFRPIDEKCDCYTCKNYTRAYIRHLIKCDETFGIRLTSYHNLYFLLNLMKQVRQAIMDDNLLEFREAFFEEYGFNKENAKSF
178	AMQ96645.1	glnA	glutamine synthetase	0.0667	50568	5.06	Cytoplasmic	446	MVKKQITGEEIKRIIEEENVRFLRLMFTDILGTIKNVEVPVSQIDKVLENKMMFDGSSIEGFVRIEESDMYLYPDLSTWMIFPWESAHGKVARLICDIYNPDGTPFAGDPRGNLKRALKDMRDLGFTSFNLGPEPEFFLFKLDEDGGITTTLNDKGGYFDFAPTDLGENCRRDIVLELESLGFEVEASHHEVAPGQHEIDFKYADVVDACDNIQTFKLVVKTIARKHGLHATFMPKPLFGINGSGMHCNMSLFNDEGNVFYDKDGELELSETAYHFLGGLLKHARAYTAVCNPTVNSYKRLVPGYEAPVYVAWSGRNRSPLVRVPESRGLSTRLELRSVDPSANPYLAMAVLLQAGLDGIRNQITPPAAVDRNIYVMDEEEREAAHIQDLPSTIHNAIK…
179	AMQ97122.1	AS238_08470	hypothetical protein AX771_06080	0.0663	16329	7.88	Membrane	144	MKKQSNVILGFVLVLIIVLFAVLNNKNVPVSFGFTSFSAPLILVIIGSALIGALIVFLTASATLWQQKKQIKQLTQEMSEYQTELQKKIEEAKEEQQREFRNERAELEAAYQAELQAKTAQISQLKAPEEQKTQSPKQSFNYFD
180	AMQ97665.1	AS238_12185	peptidase	0.0658	19835	9.52	Membrane	175	MKIKERRPLKKKQTKEKTINRVLLGLIVFLLAVIVISSIFYLRSSRPAVQAKKEAVEIAKKYANLEETDHFYWFTRKKTYFSLTGTNDKGKEIAVIIPKSGEKVKVLDQTKGLTENEAKQTIAAAHPEIQIEKAALGMYDDQPVWEVVGKETNGKLNYYLIGFESGDEVKTIKGI
181	AMQ96934.1	AS238_06165	hypothetical protein AX771_04955	0.0654	26847	5.76	Cytoplasmic	234	MKKKQKQKLLNQFRPSLDGVRGQLFRSLEEESLRRYGLPLQVMLDPKNRQILTIGLAGKTNEDTRINVPIDDNFNTVLKRIRSGENGIFERFRDNLLIEIVSYWNDQRLKNDEPTAQAVATPVTEETVSVPEEKTEKPKADTTENTRSTDTNAALSFADFSKAVAEYPKFYTEQNEHEVVINEKNADEPRKLATISMTTENEFVIEKALERKYKVKLTLIPLIEQFAATAITDR
182	AMQ98302.1	purR	transcriptional regulator	0.0654	30285	5.83	Cytoplasmic	272	MKVRRSERLVDMTQYLLNHPHELISLTSFAERYESAKSSISEDLGIIKKTFKERGYGTLETIPGAAGGVLFIPEISYEEAKKYIESLAERLSEQDRLLPGGYVYLSDLLGEPELLRQVGRIIASKYLGEKIDAVMTVATKGVPIAQAVSYYLNAPFVIVRRDSKITEGSTVSVNYVSGSSERIEKMELSKRSLKRGSRVLVVDDFMKGGGTVNGMKSLIEEFESELVGITVFAESKFNGHRAIDDYTSLLYVKDVDTQTKNITVVPGNYFSE
183	AMQ97056.1	pdhA	pyruvate dehydrogenase (acetyl-transferring) E1 component subunit alpha	0.065	40872	5.45	Cytoplasmic	369	MANKKAPIDFQALLDEVNADFPVYQALDQDGNVVNKDLVPDLSDDELVELMTHMVWSRVLDQRSTALNRQGRLGFFAPTAGQEASQLASAYAFDKEDVLLPGYRDVPQLVKHGLPLSQAFLWSRGHAAGNSYPEELKALPPQIIIGAQYVQAAGVALGLKKRNKKNVVFTYTGDGGSSQGDFYEAINFAGAYHANAVFYIQNNGYAISTPREKQTAAKTLAQKAVAAGIPGIQVDGMDPLAVYTVSKMAREWAISGNGPVLIETLTYRYGPHTLSGDDPTRYRTKDTDDDWQKKDPLIRFRKYLTEKGLWSEEKEEQVIEATKEEIKAAIAEADKVPKQKVSDFLKNMFEVSPQSIKEQIAIYEAKESK
184	AMQ96809.1	vraR	LuxR family transcriptional regulator	0.0646	23638	4.95	Cytoplasmic	210	MIKVLLVDDHEMVRLGVSSYLSIQEDIEVIGEAENGRQGYEKAMALRPDVILMDLVMEEMDGIESTKAILKDWPKAKIIIVTSFIDDEKVYPAIEAGAAGYLLKTSTAHEIADAIRATQRGERVLEPEVTTKMMEKMSRRNDPVLHEELTNRENEILMLISEGKSNQEIADELFITLKTVKTHVSNILAKLEVEDRTQAAIYAFKHGLVK
185	AMQ97464.1	asnB	asparagine synthetase B	0.0642	72882	5.39	Cytoplasmic	631	MCGIVGFVNDKDNKKTIINTMMDRIVHRGPNSSGEYIDKHVALGFRRLSIIDLEGGTQPIYNEDRTKIIIFNGEIYNYQPLREELIAAGHVFQTHADTEVLLHGYEEWGTELLQKIRGMFAFAIWDNEKNELFGARDHFGIKPYYYAEMNGTFMFGSEIKSFLPHPDFNKELNKEALKPYMTFQYSPLNGETFFKDVYRLPEGHYYTYKDGKIDIQQYWDADFETKETHSRQEWIEKIDETVQASIEAHTVSDVEVGSFLSSGVDSSYVTSVLKPDHSFSIGFDDKTYNEAIEARKLTELLDLDNTAAVIDGDMSFKAFPLIQYHLDEPDSNPSCVPLYFLANLASQSVRVVQSGEGADELFAGYQTYGFHTNSKFIRVIAQGLKKLPKGTRYNLGRKI…
186	AMQ96196.1	fetB	iron ABC transporter substrate-binding protein	0.0642	34302	4.52	Membrane	317	MKKLVVGILILASFGLAACGNSNNTSQADTKKSSTQTETTLTITDSNGDQIEVPNNPEKVVVFDNGSLDTMDALGVGDKVVGAATSSLPEYLSSYKKVESAGGIKEPDLEKINQLQPDLIIISGRQRDFQKDLSQIAPTIFLSLDAKNPWESFQQNVTALGEIFGKQEEAKTQLEELSSAIDQTKKKAEATDKKALVTLVNEGQLSAYGSGSRFGFIHDLFGFEQADDQIEASTHGQSVSYEYVLEKNPDILFVVDRTKAIGGDDSKDDISANELVAQTNAGKNQQIISLEPDVWYLSGGGLESMKLMIEDVNQAFK
187	AMQ97154.1	ebsA	ebsA protein	0.0637	16814	10.09	Membrane	143	MKKNIRWQPELAHTIIYWSLTLIILFFSLILSLENTGPYWKSNFVLGIFLVFLFLGLRRSFILKSNSVIIRYAAFWKDREISVGQIRSLTPTNTGVQMMLQDEKAPSVFMMRKKDQVVLFDHFEKNGPKSESIPYPYTKKRKS
188	AMQ97386.1	AS238_05360	hypothetical protein AX771_07605	0.0637	41365	4.79	Membrane	389	MISKEKRTSILYSFIALLFSIALYFNANGQSVPNTLSGNEAYNQTVTGVPIKISYDSKRYYIHGYENAVTVKLSSANRVQLNAEANEDTRMFRVTADITKLGEGTHEVPLKIQNLSSAVTAKIEPSTITVTVEKKVIKDFDVETLIPSTFTPSGYELDDTSVSPKKVSITTGDKTLAEIKRVVADVDASMVTDDGINSEVPIQALNAAGEVLSIVSDPVQVTVRADSIKPSKSVRLYGIQQGTPAAGVESYDFSFSKLEAEVSGSSDLLASIGDSIAVPINVSGINHRTTRKIEIPVEEGLSIKPESVSVEITPVLQTSSSSSASTSSRTQENTSTSRSISSADSGTEPSTTTISSSSESGTSSSTTSTEETSETSESTQMSRTNSSEN
189	AMQ97430.1	uppS	UDP pyrophosphate synthase	0.0633	31102	5.75	Cytoplasmic	270	MLRFFPQKNKYIQEKSEFQFNTDGPIPQHIAIIMDGNGRWAQNRRLPRVAGHKEGMETVKKVTKKASRLGVKVLTLYAFSTENWKRPKDEVSFLMQLPVDFFDTFVPELIKENVKVHVMGYENVLPEHTQDAVRRAIEQTKNNTGMVLNFALNYGSRAEIVTAVQEIAEEVAKGEIHAEEIDDELIAKHLMTGFLPKELQDPELMIRTSGEERISNFLLWQIAYSELYFTKALWPDFDGAHLEEAIASYQNRDRRFGGVKKTEDEKGDQS
190	AMQ96406.1	AWT83_06205	hypothetical protein AX771_01760	0.0625	49315	5.32	Membrane	433	MEKKQKIILGATSALTIVILILSLFFVIRSSTKKEPIIPEKKITEKAKEPTDDKQQLVTQAKNLAQSYDYDQAIALLEKDSKNGSTETQQLLQTLKKEKEQLIDWSDPTQISHVFFHSLIVDPQKAFHSQQAQGYKDYMVTVEEFNRSIEQLYQNDFVLVNLNDLIQKDEQGNLSFNGLALPEGKKPLVLSQDDVSYYEYMDNSGFPSRLVVSNNNEIKNVYKEKDKEEIGDFDMVPLIDAFVKKHPDFSYRGAKGTLALTGYNGVLGYRTSKSQYGDNEKTKKEIKEAKKVAEQLKKDGWSFASHTWGHLNMTQASLEDVKKDNELWQQEVAPILGKTNILIYPFGADISDWQPYSAENQKFAYLKSQGFDIFCNVDASTPAWGQLGTDFYRNARINI…
191	AMQ97664.1	asnS	asparagine--tRNA ligase	0.0616	49722	5.27	Cytoplasmic	432	MEQIQIIDSKNHVGETVTIGAWVANKRSSGKIAFLQLRDGTAFFQGVVVKSEVSEEVFQTAKNLHQETSVLVTGEIREDSRSKFGYEIGITNVEVVSESHDYPITPKEHGTDFLMDHRHLWLRSSRQHAIMQIRNEIIRATYEFFNQHHFVKIDPPILTGSAPEGTTDLFETNYFDQKAYLSQSGQLYMEAAAMAFGKVFSFGPTFRAEKSKTRRHLIEFWMIEPEMAFTHQEESLEVQEQYVAFLVQNVLDHCEYALDVLGRDKEVLKTYTKLPFPRITYDDAIELLKKNGFDDIEWGEDFGSPHETFIANSFEQPVFILNYPKAIKPFYMKPHPTREDVVICADMIAPEGYGEIIGGSERATDYDFLLEQIRNHGLDEKEYSWYLDLRKYGSVPHSG…
192	AMQ97428.1	eep	metalloprotease RseP	0.0616	46119	5.02	Membrane	422	MKTILTFIIVFGILVIVHEFGHFFFAKRSGILVREFAIGMGPKIYGHQAKDGTTYTLRLLPIGGYVRMAGNGDDETEMAPGMPLSLLLNSDGIVEKINLSKKIQLTNAIPMELSRYDLEDELTITGYVNGDETEVVTYPVDHDATIIENDGTEIRIAPKDVQFQSAKLWQRMLTNFAGPMNNFILAILLFIILAFMQGGVQVTNTNRVGEIMPNGAAAEAGLKENDEVVSVDGKEIHSWNDLTTVITKNPDKTLDFKIEREGQVQSVDVTPKSVESNGEKVGQLGIKAPMNTGFMDKIIGGTRQAFSGSLEIFKALGSLFTGFSLDKLGGPVMMYQLSSEAANQGVTTVISLMALLSMNLGIVNLLPIPALDGGKLVLNIFEGIRGKPLSQEKEGILTL…
193	AMQ96482.1	psaA	manganese ABC transporter substrate-binding protein	0.0612	35391	4.75	Membrane	316	MKTKKSLFLILAVSFLVLAGCGKQASDQADEGSKEKLSVVATNSILADMAKEVGTDQIDIHSIVPVGTDPHEYEVLPEDIKKASDADVILYNGLNLETGNSWFDNLMETAKKEEGKDYFAVSKNVEPLYLTSGEEHTKADPHAWLDLSNGIKYVEEIARIFSEKDAENATLYKKNAEAYVEKLKELDTQAKESFASIEENKKLLVTSEGAFKYFSRAYDLPAAYIWEINTESQGTPDQMKAIIDQIRAKEVPVLFVETSVDSRSMERVAKETGLKIYDKLFTDSIAKEGEQGDSYYQMMKWNIETIHEGLSQTKES
194	AMQ98107.1	BU190_10540	phage antirepressor	0.0612	28079	6.45	Cytoplasmic	248	MNTPQIFNFEQNEVRTFLENDIPYFVANDVAKTLGYKNPSDATNKHCKKAVKTWGSDSLGRRQSFKVIPESDVYRLIIKSNLPSAEKFEAWVMEEVLPTIRKTGSYSNVPQSFAQALRLAADLEEKNQLLEQQIAEYEPKISYLDTILSSTDTVATSQIAADYGMSAIALNKLLNELGVQHKVSGQWILYRKHMNQGYTKSHTSEIPKADGGTKVVMNTKWTQKGRVFIYNLLIAEGYYPQMDLEEIG
195	AMQ96531.1	AS238_09045	glucosyl transferase family 2	0.0608	35555	5.66	Membrane	315	MKVSIVVPCFNEEKTVPLFFDEVEKFKGAHEFEYLFIDDGSKDGTLAAIKKLASAYPYVRFVSFSRNFGKEAALYAGLQASTGDLVTVMDVDLQDPPELLPEMINRITTSDIDCVGTRRSTREGEPAIRSFFAKKFYQLINKISDTEMVDGARDFRLMTRQMVDAVLELTEYNRFSKGLFSWVGFKTEYISYENRERVAGETSWSFWKLFNYSIDGIVNFSDAPLTIASFIGALSCVGSGIAILFIILRALLFGDPTSGWPSMVSIFLFIGGIQLLCLGIIGKYIGKIFLETKQRPVYIIRETEKVKPNELKPHQ
196	AMQ96332.1	truA	tRNA pseudouridine synthase A	0.0604	28391	6.41	Cytoplasmic	246	MRNIKLTIEYDGKRYSGWQRLGDDDKTIQGKIEKVLHQMTNEEIEIIGSGRTDAGTHARGQVANFKTNTEIGLAEMIDFMNRYLPRDIVIKRIEEMPERFHSRYNAVGKKYSYYVWNNVIPSAFERNHSFYFPQELDMDKLNAACEKLVGTHDFIGFSALKKSKKSTVRTIDELSIERKGEMLHFTFVGDGFLYKMVRIIMGTLLEIGTGAMPIETIDEIFESKVRQHAGETVPAQGLFLDEVYYR
197	AMQ96810.1	ktrA	potassium transporter Trk	0.0604	24720	5.08	Membrane	221	MKQNFAIVGLGRFGGSICRTLIEAGQEVLAIDSNEDRVNEYMNIATHAVVANAQDEMTLRSLGIRNFDHVIVAIGEDIQASILVTLMVKEMGVPNILAKAQNEYHARVLEKIGADRVVHPERDMGIRIAHNLVSKNILDYLELSDKYSLAEIRVSNPKFFNKTLAELNFRQRFDLTVVAIRRVDQTVIASPAADEYVRENDNLLVIGETGDVDILDDKMNQ
198	AMQ97058.1	pdhC	dihydrolipoamide acetyltransferase	0.0599	57939	4.72	Cytoplasmic	547	MAYQFKLPDIGEGIAEGEIVKWFVKPGDTINEDDTLLEVQNDKSVEEIPSPVTGTVKNVIVPEGTVANVGDVLVEIDAPGHEDNEGDSGVAAESQTPAKPAAEPTVDTESAGSSSEGVFQFKLPDIGEGIAEGEIVKWFVKPGDTINEDDTLLEVQNDKSVEEIPSPVTGTVKNVIVPEGTVANVGDVLVEIDAPGHNSAPSTSAPSAEAPKEKVETSGSASVVEAADPNKRVLAMPSVRQFAREKDVDISQVTATGKGGRVTKEDIENFLAGGPSSAPAKSEAPEAAAPKEAAPAAESKPAAPAKPFKSNLGDLEERVAMTPTRKAIAKAMVNSKHTAPHVTLHDEVEVSKLWDNRKRFKEVAAANGTKLTFLPYVVKALTATVKKYPVLNASIDDAN…
199	AMQ96191.1	ftsY	signal recognition particle-docking protein FtsY	0.0582	36611	4.79	Cytoplasmic	332	MGFFDKIKRAFTGEEKTEEVEVQEKYDKGLEKTRKTFGERMNELFANFRTVDEDFFEELEETLIGADVGFETAIRITEALRQEVKLRNAKKSAEVQNAIIEKLVDLYEAEGINEVNELNIQEDGLTVILFVGVNGVGKTTSIGKLAHQFKNEGKKVLMAAADTFRAGAIDQLVVWGERAGVEVVRGNAGGDPAAVVFDALERAKTEQADVLLVDTAGRLQNKVNLMNELEKIKRVIQRELPEAPQETLLVLDATTGQNAMVQAKQFKETTDVTGLVLTKLDGTAKGGIVLAIRNELHLPVKLVGLGEGIDDLEPFDPNDFVVGLFKGLLKEE
200	AMQ96990.1	codY	transcriptional repressor CodY	0.0582	29067	5.13	Cytoplasmic	263	MTDLLTKTRKINTLLQQKNTFDMQADLPYDKMAVTLGGILDSNTYIIGSDGVLLGYNERHDVNNERIKTMFVEKQFPESYTDTVAQLMKTEANIPITSDITAFPVESREKYPFGLTTVVPIFGAGERLGTIILSRMEQSFADDDLVLAEYGATVVGMQILYQKSRSIEADVRSATAVQMAINTLSYSELKAVQAIFEALDGDEGRLTASNIADSIGITRSVIVNALRKLESAGIIESRSLGMKGTYLKVLNSRFKDELAKHSY
201	AMQ97547.1	AS238_14610	hypothetical protein AX771_08570	0.0582	14132	7.79	Membrane	128	MKKILGLIVIILIAFIGWKGWDYYQSTYVGKDYYAVVKAPMPAETDIKADNGEVIGRGFKYNVDAYAENGEKRQLDFDVITSGDSANGSAYPEGTILQLKASEKRIIEKKVITSDKVPSSVKEKLGLS
202	AMQ97624.1	rpsP	30S ribosomal protein S16	0.0582	10349	9.99	Cytoplasmic	91	MAVKIRLKRMGSKKSPFYRIVVADSRSPRDGRFIETVGTYNPLKDPAEVVLKEDLVLDWLSKGAQPSDTVRNILSKEGVMQKHHEAKFSKK
203	AMQ97387.1	dacA	hypothetical protein AX771_07610	0.0574	33065	5.5	Membrane	295	MSFQIGELFNLDYWQQMFSGDLFSLNFLVNILDILVVWYLVYKLIQLLRGTKAIQLLKGVAIFIVIRIVAEIIGLHTLSWLMNQVITYGVIAAIVIFQPEIRRGLEHLGRSSLFKQSKSEQQEDEKMILSFDKAIQYMSKRKIGALITIERHTGLDEYIETGIALDADITGELLINIFIPNTPLHDGAVIVKEGKIAVASAYLPLSESMLIPKEFGTRHRAAVGISEVSDAITIVVSEETGDVSITLDNELMAGLSQQEYLAILRRELIAEEKTKNKKNVIQSFLDGMTKGGDRK
204	AMQ98151.1	secE	preprotein translocase subunit SecE	0.0574	6618	9.78	Membrane	56	MKFLKSVKDEIKQVTWPSRKQLRKDTLVVIETSIIFGLMFYVMDTAIQSLFGWILK
205	AMQ97009.1	AS238_12545	ABC transporter substrate-binding protein	0.0574	36990	4.88	Membrane	330	MKKLWLLLPLLLLLSACGTAKETSSKQEIKDLKKVTLVLDYVPNTNHTGIYLAKEKGYYKEAGLNVQIIEPGDNSTSIGLVGADKAQFGVSYQEDVTYAHADGQNIPVKAIATVIKHNTSGFATLSDSNIHSPKDFEGKTYAGWQSPSEEAVLKAVMEKDGGDFSKLTMVGSNGEGPESLGKSSDIQWYFEGWDMIKAKEAGIELNYIPLKELDERLDYYTPVIITNDQLIKSDPELVQSFMDATKKGYQEAIKDPNDSAKLLQKYAKENDRTFLEESQAFLSKNYTDDPENWGLMEEKVWRNYTAFMQENGLIKQDVPSQELFTNQFIK
206	AMQ96629.1	potA	spermidine/putrescine ABC transporter ATP-binding protein	0.0566	41142	4.85	Cytoplasmic	361	MGKPIISFDQVVKRYDDETVLKKVSFEIEQGKFYTLLGPSGCGKTTILRIIAGFTEATEGDIYFEGKRLNDLPANKRQVNTVFQDYALFPHMNVFDNVAFGLKIKKMSKSDIEKKVKDALRMVQLPGYEKREISEMSGGQRQRVAIARAIVNEPKVLLLDEPLSALDLKLRTDMQYELRDLQQRLGITFIFVTHDQEEALAMSDEIFVMNKGKIVQSGTPVDIYDEPINHFVADFVGESNIVDGVMIEDNLVEFVGKQFECVDGGMRLNEPVEVVLRPEDLTITTPDKGKLVVTVDTQLFRGVHYEIICYDEQQNEWMVHSTKKAKEGSKVGLAFEPEDIHVMRFNESEEEFDARLDSYEE
207	AMQ97342.1	tcyP	sodium:dicarboxylate symporter	0.0566	48688	9.44	Membrane	463	MTTLITVLVVLVFAALLYVFYRMQKRHTKFSTRVFTALGVGIVFGGLLQLIFGVDDKVVTQSMEWIGIVGQGYVSFLQMLVMPLVFISIIGAFTKMKVSEKLGKISATVLTSLLGTTAIAALIGIGSTMLFGLQGAKFTQGAAETARISELATRQETVENLSIPQQILSFIPKNVFADLAGSRATSTIGVVIFAAFVGIAYLGVKRKAPKEAAFFSDLVDSLYKIIMRIVTLVLRLTPYGVFALMTNVLATSDFAAIVNLGKFVVASYVALLAVLIVHSLILIGAKVNPINYFKKAFPVLSFAFTSRSSAGALPLNIETQTKALGVDDATANFSASFGLSIGQNGCAGVYPAMLATIVAPAAGVNVFSLEFILMLVAIVTISSFGVAGVGGGATFASLI…
208	AMQ98824.1	vanS	histidine kinase (plasmid)	0.0561	41396	5.21	Membrane	364	MYIVAIVVVAIVFVLYIRSMIRGKLGDWILSILENKYDLNHLDAMKLYQYSIRNNIDIFIYVAIVISILILCRVMLSKFAKYFDEINTGIDVLIQNEDKQIELSAEMDVMEQKLNTLKRTLEKREQDAKLAEQRKNDVVMYLAHDIKTPLTSIIGYLSLLDEAPDMPVDQKAKYVHITLDKAYRLEQLIDEFFEITRYNLQTITLTKTHIDLYYMLVQMTDEFYPQLSAHGKQAVIHAPEDLTVSGDPDKLARVFNNILKNAAAYSEDNSIIDITAGLSGDVVSIEFKNTGSIPKDKLAAIFEKFYRLDNARSSDTGGAGLGLAIAKEIIVQHGGQIYAESNDNYTTFRVELPAMPDLVDKRRS
209	AMQ96107.1	ssb	single-stranded DNA-binding protein	0.0557	18441	4.89	Cytoplasmic	170	MINNVVLVGRLTKDPDLRYTASGTAVATFTLAVNRNFTNQSGNREADFINCVIWRKSAETLANYARKGTLLGVTGRIQTRSYDNQQGQRVYVTEVVADNFQLLESRSASENRQQSGGFQSSGQSAGGFGGNNNSNQTSQSSNGMPDFDRDTSDPFGSSSTIDISDDDLPF
210	AMQ96777.1	AS238_09895	hypothetical protein AX771_03970	0.0553	14639	4.76	Membrane	133	MLDIVPSNTHRSGSLINFAAIFACASVILASPVVVDASSTPKTKNDNQLVITTKNEINTISSNDGKIFDVINTVLKRKAEINIKYDEDLNLYFFVIKTTSELFSSDYDVLDTLDNVLSDYKYMGKSVVATLGE
211	AMQ96160.1	rplX	50S ribosomal protein L24	0.0544	10931	9.82	Cytoplasmic	102	MFVKKGDKVKVITGKDKNKEGVVLAAFPKKDKVIVEGVNVVKKHQKPSQAAPQGGIVEMEAPIHVSNVMVVDSTGVAGRVGYKEVDGKKVRVSKKTGEVLDK
212	AMQ97440.1	arcB	ornithine carbamoyltransferase	0.0544	38358	5	Cytoplasmic	339	MKESVFQGRSLLAEKDFTKEELQYLIDFSEHLKDLKKRGIPHHYLEGKNIALLFEKTSTRTRSAFTTAAIDLGAHPEYLGANDIQLGKKESTEDTAKVLGRMFDGIEFRGFSQKMVEELAEFSGVPVWNGLTDEWHPTQMIADFLTIQENFGTVEGITVAYCGDGRNNMANSLLVTGAILGANMRIVAPKELQPEEEIVKMAEGFAEKSGAQLMITDDVDKGVDGADVLYSDVWVSMGEEDKFEERIKLLKPYQINMEMVEKTHNTDRLIFLHCLPAFHDTNTVYGEQMKERFGITEMEVTDEVFRSKYARQFDQAENRMHSIKAIMAATLGNLFIPRV
213	AMQ98259.1	BU184_14325	ABC transporter	0.054	66108	7.66	Membrane	594	MEKKKTLNTRALIRFWKMIKPEHKYFYGLFLCSLFGNLLVVAMPLIMGIGIDDLLSEIRKTGIGQLSFSDIKQALLFPVLLLIGCSVLSSITSFIQERTMAALSEKITLRVRKEITKKFKTLPMSFFDNHQVGDIISRTTTGLNQLSQVLLTGINQFFTSVVTIAAAGLMLFYIESKLTLLVLLLIVGSSIVTTKIANKNKQISEQNQYELGVLNNRMEEILAGNLVVKTFNQQAHAEAAIHEVNKKQYNAFKRAQFMNFAIYPAIRFINQLAFIISAVFGAMLVLSGGVTIGFLQAYLQYINQISEPISTASYVINSIQSAMAAIDRIFEILDETDEIPDLPDARLLEQPKGKIAFKNVQFGYTSDKILMNQVDFSVKPKQTVAIVGPTGAGKTTLVN…
214	AMQ96181.1	rpmB	50S ribosomal protein L28	0.054	7015	11.48	Cytoplasmic	62	MAKVCYFTGRKTKSGNNRSHAMNSTKRTVKPNLQKVRVMVDGKPKKVWVSTRALKSGKVERV
215	AMQ98145.1	rplK	50S ribosomal protein L11	0.054	14838	9.52	Cytoplasmic	140	MAKKVEKIVKLQIPAGKATPAPPVGPALGQAGINIMGFTKEFNARTADQAGLIIPVVISVYEDRSFTFVTKTPPAAVLLKKAAKIEKGSGEPNKNKVAKVSSDQVREIAELKMEDLNAANVEAAMRMVEGTARSMGITVE
216	AMQ98790.1	aphA	aminoglycoside phosphotransferase (plasmid)	0.0532	30954	4.54	Cytoplasmic	264	MAKMRISPELKKLIEKYRCVKDTEGMSPAKVYKLVGENENLYLKMTDSRYKGTTYDVEREKDMMLWLEGKLPVPKVLHFERHDGWSNLLMSEADGVLCSEEYEDEQSPEKIIELYAECIRLFHSIDISDCPYTNSLDSRLAELDYLLNNDLADVDCENWEEDTPFKDPRELYDFLKTEKPEEELVFSHGDLGDSNIFVKDGKVSGFIDLGRSGRADKWYDIAFCVRSIREDIGEEQYVELFFDLLGIKPDWEKIKYYILLDELF
217	AMQ96844.1	fabF	beta-ketoacyl-[acyl-carrier-protein] synthase II	0.0523	43386	5.18	Cytoplasmic	411	MNRVVITGYGVTSPIGNDADSFLNSLKEGTNGIAPITKFDASETGITLAGEVKDFPYDKYFIKKDSKRMDMFSIYGIYAALEAMEMSGLDKEKMNQDRFGVIIGSGIGGLPTIENQVIRLHEKGAKRVSPMFVPMAIANMAAGNIALRVGAKGICTAIVTACASGTNSIGEAFRNIKHGYSDVILAGGTEATICEMGIAGFAALTALSESTDPNRGSIPFDENRNGFVMGEGAGVLVLESLEHAQARGAKIYGEIVGYGANCDAYHMTAPTPDGSGASKAMKLAMEEAGVQPEQVGYINAHGTSTPANDQAEAKAIQIALGENFRDTYVSSTKSMTGHLLGAAGGIEALATLLALEHQFIPPTINVEKQDPEIDLTVVKNESKPASFTYAMSNSLGFGG…
218	AMQ97730.1	AS238_07655	general stress protein	0.0519	15270	8.86	Membrane	146	MSGGEIAGLIAAIAFAILVVFIVRVLLQVSKTLEKVDQTVAEANTTIEIVTKDVDLLSRQVEGLLVKSNELLLDINGKVATIDPLFTAVADLSESVSELNHSSKNIATKVGGIGKTTAKATVAGKVGGTAMKFFKNKKHTETTGGK
219	AMQ97030.1	lytG	N-acetylmuramoyl-L-alanine amidase	0.0515	23481	5.95	Extracellular	205	MAKKKWKKQKRKNIRWPAVVAGVAVILLAFVFSLKNLSSPFTDNQQENEAQSHQQFIERLVPHAQELQDGYGVLPSIILGQAILESNWGKSTLASKYNNLFGIKAYGDQKKVSLETKEFVNEEWITIQGDFKVYDSWEQSMDDHTQLFVQGVDWNPALYEKVITATNYQEAAQALQDAGYATDPGYAQKIIQVIETYQLNQYDRR
220	AMQ96756.1	B4W81_00050	portal protein	0.0498	44902	4.96	Cytoplasmic	392	MGIFQKAVGYFTKKATVPLEEYFCKLQVDFVYRKFAIETCIDLIANAMSKAEFKSYEDGKNKKNDLYYRLNVAPNKKNNATEFRKKLIRRLIFYNEVLIVSPSNNSSEIFIADSWDVTEYALKDDVFSQVQINNIVLDREFLESDVIYIKYADQQIRQLVDAYYQAYGKLISSAMNVYKRSNARRYVLKGNLFRPQDNTTQDQINKMMTSQFKAFMEADNAGAVFQLQNEYTLEDFSGNFQSNSRDIKNLIDDIFEMTAAAFHVPKNLLKGDMSGLSDQVDAFLMFEIIPIAELIQDAFNASLYEVEEYLSGNFVRVDTTMIKITSFKDLVDAIDVGIRNGVFTINEGRERVGNDRSDKAMADEIFITKNNQQVSKGGEANDDNENISSSKE
221	AMQ97105.1	artQ	glutamine ABC transporter permease	0.049	24411	9.04	Membrane	218	MDFSGAFSWMNIRFLLEGLKVTVEVSLFSIIFSFLIGGLTGVIRFANIPFFSKILGVVIDIIRNLPLLLIIFFTYFALPQIGIQMNIFWSAVAALTIFESAMLSEIFRAGLNAVPKGQMEAGLSTGLTYVESMRTIVLPQAFKSMIPAIVSQLISLIKDTSLAVIISLPELSHQARIIYGQNTNYVLPMFIIMTLMYFVVCYALSLLSGYLEKRRYSY
222	AMQ97806.1	ntpK	ATP synthase subunit K	0.0485	16040	6.54	Membrane	156	MMDYLISQNGGMVFAVLAMATATIFSGIGSAKGVGMTGEAAAALTTSQPEKFGQALILQLLPGTQGLYGFVIAFLIFINLGNDMSVVQGLNFLGASLPIAFTGLFSGIAQGKVAAAGIQILAKKPEHATKGIIFAAMVETYAILGFVISFLLVLNA
223	AMQ97121.1	fabG	short-chain dehydrogenase	0.0485	28828	6.77	Cytoplasmic	262	MNLEDKVVLVTGSSGGLGAQICYEAAKQGAIVISCARRMAFVEGVRDECRRLSGKEAYAFKVDVSNPESVDELYEKVMEEVGRVDILVNNAGFGIFEDFLTFDLGKAYDMFEVNILGMMVLTQKFAIDMAERRQGHIINIASMAGKMATAKSTVYSATKFAVLGFSNALRLELKPLGVAVTTVNPGPIETNFFDKADPSGSYLEKVGQIVLEPAKLAKMIVRNMRHPKREINQPFILEVASKFYTLFPTIGDYLASGIFNKK
[truncated: 290 more rows]

## Sheet: Comparison between MVs
Table S1. Proteins identified in the membrane vesicles derived from E. faecium ATCC 700221 using 1-DE-LC-MS/MS analysis
[truncated: 648 more rows]
